# Supplementary material for: Uncovering shared and tissue-specific molecular adaptations to intermittent fasting in liver, brain, and muscle
Source: eLife. 2026 Apr 17;14:RP107332. doi: 10.7554/eLife.107332 (PMC13090031; doi:10.7554/eLife.107332)
Supplement: Supplementary file 1. [file elife-107332-supp1.xlsx]

## Sheet: Liver_raw
Uniprot ID	Genes	L1	L3	L4	L5	L6	L7	L8	L9	L11	L12	L13	L14	L15	L16
		AL	AL	AL	AL	AL	AL	AL	IF16	IF16	IF16	IF16	IF16	IF16	IF16
A0A075B5J9;A0A075B5K3	Igkv17-121;Igkv17-127	NA	377254	NA	NA	NA	NA	324243	1450000	1330000	651734	405242	NA	397868	376502
A0A075B5K0	Igkv14-126	NA	NA	NA	NA	NA	NA	NA	NA	NA	NA	NA	NA	NA	NA
A0A075B5K2	Igkv9-124	511521	930576	1270000	1210000	624245	800561	707975	1600000	836541	753381	759670	908612	1690000	1390000
A0A075B5L0	Igkv10-95	448410	369543	382890	912235	577236	363357	540702	1440000	1730000	505610	675617	486956	355196	198709
A0A075B5M1	Igkv4-63	647551	2440000	1710000	880945	219308	186897	341150	1160000	373295	NA	351055	377229	449947	3440000
A0A075B5M4	Igkv4-57-1	NA	NA	98104.7	NA	NA	NA	NA	165190	NA	NA	NA	NA	NA	262020
A0A075B5M7	Igkv5-39	3250000	2530000	2080000	985112	419191	447082	2440000	2430000	2320000	928250	647827	1160000	1610000	2110000
A0A075B5N3	Igkv8-28	NA	407705	302654	107208	320021	167400	461149	505992	509152	302141	654178	300898	460914	516310
A0A075B5N4	Igkv8-27	446832	258122	604108	514552	232937	458609	437351	413736	778859	575950	394217	495964	1160000	720651
A0A075B5N9	Igkv3-7	3040000	NA	1530000	801072	1280000	235824	1140000	3180000	1990000	1660000	1290000	1250000	2180000	2780000
A0A075B5P0	Igkv3-2	678357	124358	NA	288226	317725	169518	151476	1300000	941641	295807	311859	226550	374291	299847
A0A075B5P8	Ighv2-2	NA	NA	NA	NA	NA	NA	NA	NA	NA	NA	NA	NA	NA	NA
A0A075B5Q4;A0A075B5Q9	Ighv5-12;Ighv5-15	574542	258823	112499	140036	230484	150299	136641	296648	829085	118747	184952	147185	59650.8	268469
A0A075B5Q6	Ighv5-9-1	NA	NA	NA	NA	261272	NA	240899	NA	296195	NA	503942	NA	NA	NA
A0A075B5R0	Ighv5-16	NA	NA	263355	249163	NA	NA	188369	NA	602193	357742	221442	164432	245924	273791
A0A075B5R2	Ighv7-3	NA	NA	NA	NA	95444.6	NA	57529.9	256415	149459	84126.7	297358	141700	114679	1100000
A0A075B5R5	Ighv4-1	79920.9	119467	221175	221622	373135	429107	333841	422777	750692	227118	606027	761509	341152	1110000
A0A075B5T2	Ighv6-3	NA	NA	452727	NA	NA	NA	NA	NA	NA	NA	712969	NA	NA	NA
A0A075B5T5	Ighv1-5	NA	NA	45112.5	38542	43063.4	202218	168155	NA	175360	NA	NA	NA	NA	99481
A0A075B5T6;A0A0B4J1J6	Ighv10-1;Ighv10-3	304018	NA	NA	343031	NA	NA	198783	NA	NA	NA	NA	327332	NA	378158
A0A075B5U4	Ighv1-18	NA	NA	NA	NA	NA	NA	NA	NA	201042	NA	NA	NA	NA	80028.1
A0A075B5U6	Ighv1-20	NA	NA	NA	NA	NA	NA	NA	NA	NA	NA	NA	NA	NA	NA
A0A075B5V0	Ighv1-26	NA	NA	NA	NA	NA	NA	NA	NA	NA	NA	NA	NA	NA	NA
A0A075B5V1	Ighv1-31	3640000	3580000	4920000	3290000	2560000	4510000	3330000	773960	6290000	2230000	3260000	5380000	1180000	4220000
A0A075B5V8	Ighv1-47	NA	NA	NA	NA	NA	264941	NA	590806	NA	NA	515181	339680	319724	NA
A0A075B5W1;A0A075B5X7	Ighv1-50;Ighv1-69	NA	NA	NA	NA	NA	NA	NA	75946.9	NA	NA	NA	NA	NA	118019
A0A075B5W3	Ighv1-53	NA	NA	NA	NA	NA	NA	NA	NA	NA	NA	NA	NA	NA	63875.8
A0A075B5W5	Ighv1-54	NA	NA	NA	NA	NA	NA	NA	NA	NA	NA	NA	NA	NA	NA
A0A075B5W9	Ighv1-58	NA	NA	NA	NA	NA	NA	NA	NA	NA	143278	NA	NA	NA	NA
A0A075B5Y0	Ighv8-13	NA	NA	NA	NA	NA	NA	NA	NA	NA	140744	NA	NA	132550	NA
A0A075B5Y1	Ighv1-74	NA	NA	NA	NA	NA	NA	NA	NA	NA	NA	455938	NA	NA	NA
A0A075B5Y4	Ighv1-81	550827	NA	169905	NA	NA	105678	NA	767263	550613	NA	105243	NA	334280	327772
A0A075B677	Igkv4-53	NA	NA	NA	NA	NA	NA	NA	343152	42099.1	NA	146265	NA	753601	190503
A0A075B680	Ighv1-62-2	NA	NA	NA	NA	NA	NA	NA	806549	NA	802771	NA	NA	NA	NA
A0A087WQ44	Srcap	328781	336289	341171	288472	338856	248521	207603	291973	258336	357450	344777	162625	170442	261402
A0A0A6YXQ0	Ighv8-8	52401.6	109118	162702	116657	90792.4	87509.1	56861.7	NA	164899	NA	NA	NA	NA	184814
A0A0A6YXW6	Igha	15400000	36400000	14100000	29200000	9800000	18300000	11800000	18700000	15800000	15200000	13400000	20400000	21000000	13200000
A0A0A6YYE7	Igkv4-57	871145	458923	371954	477056	485535	524964	685846	1360000	1570000	479145	863518	335360	387368	2280000
A0A0B4J1H6	Igkv2-137	422898	220611	1250000	334198	NA	NA	330990	482134	330300	NA	NA	NA	362148	337337
A0A0B4J1H7;A0A0B4J1H8	Igkv1-133;Igkv1-135	426952	163401	319186	NA	335640	646894	294531	730690	334250	271434	372581	521662	487268	497409
A0A0B4J1I0	Igkv1-110	918996	406257	433960	532436	351278	629804	735382	765013	1240000	573072	901996	1260000	799711	1520000
A0A0B4J1I1	Igkv16-104	570354	NA	NA	NA	NA	571389	NA	120622	172797	NA	NA	NA	NA	272700
A0A0B4J1I5	Igkv4-70	NA	NA	NA	NA	NA	NA	NA	NA	NA	NA	NA	NA	NA	NA
A0A0B4J1I7	Igkv4-68	NA	NA	NA	NA	NA	NA	NA	NA	NA	NA	NA	NA	NA	NA
A0A0B4J1J5	Ighv9-3	NA	NA	NA	NA	NA	NA	NA	NA	NA	NA	NA	NA	NA	NA
A0A0B4J1N0	Ighv1-76	NA	NA	NA	NA	NA	NA	NA	410124	715695	NA	NA	NA	NA	NA
A0A0G2JDV3	Gbp6	567595	292561	386307	443764	537807	690479	712085	438886	481811	514897	458277	354562	375980	885007
A0A0G2JE99	Iglc1	580232	1260000	412042	629417	NA	645915	289140	535720	361662	417572	422922	633892	412892	390394
A0A0G2JG52	Crybg1	768919	1730000	759523	657201	655947	650382	493919	709164	784378	605659	743175	738762	854631	815220
A0A0N4SUJ3	Naaladl2	494404	376208	454615	268863	634335	451855	269905	256840	195475	340621	292896	262293	293794	483661
A0A140LIF8	Irgm2	NA	NA	NA	NA	NA	NA	275838	NA	NA	NA	NA	NA	NA	NA
A0A140LIS8	Gm4756	193719	275269	166540	280889	512622	161478	423759	184891	302582	260399	203963	95967.8	234304	166019
A0A140T8M1	Igkv10-96	382903	394178	508874	367188	NA	387963	498050	560819	885366	405635	NA	856075	478218	789756
A0A140T8M2	Igkv12-44	NA	NA	NA	NA	NA	NA	NA	NA	NA	NA	NA	NA	NA	NA
A0A140T8M5	Igkv6-15	510932	348091	220476	326131	139249	158836	NA	212818	332543	NA	167600	204313	315536	307254
A0A140T8N3	Igkv13-84	NA	NA	NA	NA	NA	NA	NA	NA	NA	NA	NA	NA	NA	NA
A0A140T8N5	Igkv6-23	346758	NA	105013	165785	NA	NA	NA	NA	210642	NA	NA	NA	110526	309719
A0A140T8N9	Igkv6-32	NA	NA	NA	NA	NA	NA	NA	250932	NA	NA	NA	NA	NA	176020
A0A140T8P6	Igkv12-46	552783	NA	231808	245942	NA	268707	242335	351269	176620	NA	NA	NA	571839	484587
A0A140T8P9	Igkv14-111	881907	753987	837030	733568	549628	573211	543849	263433	414172	625211	465450	830694	563422	792105
A0A140T8Q4	Igkv3-4	194036	NA	152129	NA	103578	NA	145922	256392	131431	NA	148665	NA	148041	100811
A0A1D5RLD8	Gm10358	NA	NA	276220	NA	353220	NA	NA	240308	NA	351515	345302	NA	NA	199625
A0A1L1SSC7	Ttc13	418478	612527	569575	626007	514148	763206	563621	642410	590028	409635	518406	737838	601257	655201
A0A1W2P7S8	Gm32717	NA	NA	NA	NA	NA	267533	NA	NA	NA	NA	NA	410433	NA	NA
A0A1Y7VJN6	Ighg3	2720000	1050000	2250000	2430000	2510000	3750000	4470000	15300000	2610000	3210000	3630000	3460000	2810000	5940000
A0A286YCV9	Kif13b	6040000	6480000	6220000	5130000	7950000	6210000	7740000	6000000	6740000	5890000	6300000	5510000	5750000	5470000
A0A286YCX6	Trappc8	619401	736085	1030000	738659	1090000	947452	742451	851131	737574	665260	853639	634060	720007	548413
A0A571BD48	Dnah7b	1340000	1380000	881410	828194	1070000	960113	706822	NA	605017	616200	416155	599534	658173	NA
A0A571BEN1	Mybpc1	178721	180786	NA	NA	NA	NA	NA	NA	125872	NA	NA	NA	NA	NA
A0A571BF58	Neb	NA	NA	NA	NA	220242	NA	196219	191856	203645	198661	167557	608180	323468	393350
A0A571BF69	Mgam	954455	1260000	831591	834655	808680	801259	992725	1080000	987702	927774	904743	1100000	1140000	1070000
A0A5F8MPH8	Tnxb	834081	1420000	904086	998403	2030000	1260000	1380000	1070000	1150000	1710000	1100000	1070000	1620000	1150000
A0A5F8MPI9	Rapgef1	708612	NA	689651	328582	825386	441150	668014	544057	734916	533990	730202	681347	589755	585139
A0A668KLU9	Cfhr2	NA	355364	205937	NA	429822	288569	227973	55613.6	391477	231991	81509.1	143482	174152	220624
A0A7N9VR94	Ahnak2	265003	584686	474821	499672	560569	334921	156755	198209	274467	415196	519309	338976	371724	191676
A0A7N9VSG0	Spata5l1	NA	NA	178829	NA	342285	377663	262887	357926	173097	NA	319522	195539	57183.3	NA
A0JNU3	Aspg	3620000	3260000	4750000	4710000	6070000	4370000	5590000	5050000	4910000	5700000	4110000	4790000	4980000	5860000
A1IGU4	Arhgef37	NA	NA	270681	116159	216873	NA	214796	118333	315309	258602	320776	156119	NA	139677
A1L314	Mpeg1	NA	NA	NA	NA	NA	NA	NA	NA	NA	NA	NA	NA	NA	NA
A1L3P4	Slc9a6	144916	84747.1	82226.9	102492	357763	223322	387476	168880	262577	177393	209409	96470.7	122317	47579.1
A2A432	Cul4b	415961	NA	461813	408724	343036	359840	169363	NA	463926	365242	146340	265610	NA	NA
A2A484	Zmynd8	441775	116894	255256	197536	263997	216175	124821	298797	207409	176793	222808	282268	211609	194497
A2A4P0	Dhx8	240481	198016	276703	335978	264850	325369	310146	172047	110252	NA	160024	149615	260947	259864
A2A5R2	Arfgef2	992678	1170000	972870	819689	955842	1150000	833598	643650	496186	511105	550436	678058	734940	636185
A2A654	Bptf	352164	467841	227132	215689	227113	117176	98029	216669	214427	220126	264294	115180	135548	119332
A2A6A1	Gpatch8	251322	NA	301808	218056	307438	179902	282324	298571	275162	303051	216884	292193	295329	212510
A2A7S8	Kiaa1522	835619	852656	793072	825553	925664	786880	648891	1250000	792246	696901	755393	837650	911244	937199
A2A8L5	Ptprf	1480000	1380000	1400000	1450000	2120000	1980000	2020000	1580000	1380000	1430000	1390000	1200000	1380000	1350000
A2A8U2	Tmem201	167438	208711	165866	300806	305616	176043	171546	NA	211044	173661	139525	141249	153923	115941
A2A8Z1	Osbpl9	157766	411853	272410	407359	469821	619632	576788	749013	419919	262040	413824	477254	393452	460571
A2A974	Cyp4a12b	22933.6	NA	49680	92959.1	137385	100552	159228	NA	89473.1	100264	NA	NA	NA	90326.7
A2A995	Fyb2	412438	460402	407767	473073	401217	NA	NA	225301	442115	NA	NA	287259	170266	259041
A2A9C3	Szt2	117726	176727	NA	NA	253078	NA	306604	NA	171069	211303	351933	NA	150786	262281
A2ACQ1	Dhx35	150881	NA	201223	119625	309662	326630	170127	186295	171458	NA	128816	NA	NA	149981
A2ADA5	Pusl1	NA	NA	NA	NA	NA	NA	157409	171258	296887	277890	238667	219511	210009	205343
A2ADY9	Ddi2	10200000	11000000	14400000	13800000	15900000	11200000	16000000	13100000	14800000	15700000	19400000	14500000	13100000	15800000
A2AGH6	Med12	NA	NA	NA	227941	437006	520813	503910	291368	251400	261688	563193	437662	611059	673576
A2AGT5	Ckap5	1710000	1170000	1520000	1320000	1840000	1670000	1830000	1920000	1510000	1350000	1560000	1320000	1410000	1570000
A2AHG0	Lzts3	542327	889328	469485	552806	313587	424262	788583	326940	720524	346313	558926	930437	637875	439906
A2AIG8	Accs	39478.8	NA	76268	NA	67816.5	48781.5	65754.3	66526.9	71516	77223.8	30899.9	NA	NA	54723
A2AIL4	Ndufaf6	272582	NA	334937	351647	252789	198215	247850	248279	376516	425451	543364	493496	439686	501291
A2AIV2	Virma	NA	NA	NA	NA	NA	NA	35226	NA	NA	NA	NA	NA	NA	NA
A2AJ72	Fubp3	2900000	3930000	3150000	3450000	2630000	2330000	2730000	2680000	2620000	2360000	3350000	3540000	3090000	2100000
A2AJ88	Pnpla7	252136	NA	311623	226480	301653	218421	304159	309192	359380	394664	309412	288650	310095	264661
A2AJI0	Map7d1	1070000	1530000	984982	1020000	822589	809035	349216	1250000	979096	1070000	872906	1240000	1120000	859793
A2AJL3	Fggy	1040000	615030	1220000	876005	1540000	1130000	1670000	1740000	1170000	1380000	1630000	1220000	1300000	1310000
A2AKK5	Acnat1	3890000	3730000	3650000	2480000	4680000	3120000	3650000	2550000	2230000	2080000	2250000	2650000	2240000	2080000
A2AKQ0	Slc35d1	NA	NA	NA	NA	NA	NA	NA	NA	NA	NA	NA	NA	NA	NA
A2ALU4	Shroom2	2160000	1880000	1550000	1610000	1720000	1490000	1380000	1610000	1400000	1380000	1550000	1370000	1160000	1180000
A2ALW5	Dnajc25	NA	NA	NA	NA	90865.6	254910	182784	NA	117354	NA	NA	83755.9	NA	NA
A2AN08	Ubr4	1280000	1250000	1000000	1170000	1190000	1200000	1030000	1210000	935480	845015	847319	797447	949208	980879
A2APT9	Klhdc7a	323754	274991	139815	199480	345997	180347	254479	235984	211324	162099	269943	135611	NA	NA
A2APV2	Fmnl2	1030000	NA	1210000	871712	1070000	1140000	1440000	799413	1780000	1870000	1750000	1550000	1380000	1550000
A2APY7	Ndufaf5	328834	541016	863545	540220	578519	479968	517627	454855	412015	835063	779907	788814	696247	623358
A2AQ07	Tubb1	260375	373094	NA	462997	312604	411041	480405	922651	524305	423172	740155	656787	442559	739398
A2AQ19	Rtf1	525490	449014	406753	621434	645767	550593	718434	NA	417218	NA	NA	435606	527307	555049
A2AQ25	Skt	795309	749508	717698	806097	991818	769067	720712	1110000	807857	813009	998329	722212	812503	837587
A2AR02	Ppig	1410000	2190000	2200000	1390000	4510000	3490000	3660000	1230000	1550000	2560000	2890000	1920000	1630000	1240000
A2AS37	AI182371	364764	146229	231364	156601	382045	370633	549245	601836	514796	560746	283384	288054	335876	359903
A2AS89	Agmat	7950000	6230000	14500000	7040000	8930000	6440000	15200000	22800000	18400000	24100000	34600000	12800000	13900000	20000000
A2ASQ1	Agrn	578638	612254	421645	430559	488436	412772	399145	296325	299770	230089	NA	197490	271813	274343
A2ASS6	Ttn	320290	81517.9	243289	255734	468096	562958	371743	212871	223636	232705	167481	382958	431943	427474
A2ASZ8	Slc25a25	NA	NA	NA	NA	350688	NA	314480	204957	296214	NA	429973	NA	318399	256917
A2AT37	Upf2	3180000	5440000	5270000	9710000	4440000	2930000	3230000	3790000	2920000	3930000	2760000	2620000	2380000	2380000
A2ATU0	Dhtkd1	1080000	971499	1770000	1000000	4390000	1700000	3380000	2700000	2820000	2950000	3040000	1850000	2300000	2480000
A2AUP5	Pfkfb3	267762	625535	434422	412668	422853	471904	606650	364624	469405	512822	363681	NA	451884	535717
A2AWA9	Rabgap1	489771	336608	459481	549590	718764	711729	540600	NA	578002	440271	467010	508777	441733	504898
A2AWP8	Arhgef10l	942912	405992	458452	600539	679491	917476	505409	719398	627841	606405	NA	588861	NA	533684
A2BDX3	Mocs3	1210000	1420000	1940000	1220000	1150000	1440000	1400000	1070000	1560000	1370000	1330000	1540000	1210000	1390000
A2BH40	Arid1a	1610000	1020000	920223	1120000	621423	649743	640084	826721	835358	695787	764048	603970	863433	604400
A2BIM8;P02762;P04938	Mup11;Mup18;Mup6	54200000	44400000	89100000	43000000	60300000	46100000	68200000	42700000	38100000	54400000	48300000	35600000	34100000	33400000
A2CEK7;E9PVW0	Mup14;Mup8	15900000	10500000	10400000	10200000	9360000	6660000	9650000	9360000	6920000	10700000	10800000	5180000	4930000	8180000
A2RSJ4	Bltp3b	402340	372091	452156	433749	621031	421802	529836	557872	546364	594478	527172	417849	605345	483841
A2RSQ0	Dennd5b	536751	464118	515966	399787	613646	527629	372233	484911	477545	495376	676404	626274	601664	540861
A2RSY6	Trmt1l	NA	NA	NA	NA	198845	NA	232566	NA	261290	NA	92997.8	NA	158883	NA
A2RT81	Rnf39	NA	NA	NA	NA	296116	NA	NA	447880	218043	187445	278613	246722	288066	NA
A2RTH5	Lcmt1	507211	347816	588281	372572	537704	404285	NA	448652	NA	387107	NA	386209	NA	NA
A3KGB4	Tbc1d8b	1500000	2620000	3340000	2630000	894168	1800000	1110000	1420000	791836	1000000	1290000	502953	896421	856319
A3KMP2	Ttc38	1280000	1310000	2610000	1650000	2140000	2070000	2580000	2240000	2320000	3050000	3130000	2610000	2120000	2160000
A4FUP9	Glt1d1	NA	NA	NA	NA	NA	NA	NA	NA	NA	NA	NA	NA	NA	NA
A6H584	Col6a5	339090	464690	358639	419199	481813	427935	312594	283810	403303	389313	256853	373314	416329	446126
A6H5X4	Phf11	68597.7	NA	NA	NA	NA	NA	NA	NA	NA	NA	100151	NA	NA	NA
A6H5Y3	Mtr	107524	NA	NA	211738	262116	239292	181173	276688	130143	263510	207042	211186	72452.3	131855
A6H5Z3	Exoc6b	586554	520844	650168	662982	548907	751109	605836	635908	530980	437490	374437	516668	480902	599449
A6H611	Mipep	496383	602298	488131	638067	486051	270521	471096	592368	432645	500808	495434	435174	379719	548414
A6H619	Phrf1	223278	NA	226996	181914	417617	447264	244741	288053	173689	226339	285247	248322	263867	253554
A6H6A9	Rabgap1l	250180	368217	219323	301933	183639	355541	197487	176602	167205	NA	NA	NA	141452	214105
A6H6E2	Mmrn2	116368	248010	142995	247476	172137	152553	150983	137948	168054	156110	99163	74936.5	188809	154636
A6H6J2	Cyp2b13	1020000	897308	1140000	921519	666918	876238	512296	626587	418609	393330	332100	306118	515852	522246
A6H8H2	Dennd4c	1010000	914318	1090000	945851	1140000	1040000	982178	1210000	1240000	1800000	810291	871552	842207	985901
A6X919	Dpy19l1	1740000	2610000	1430000	2630000	1940000	2330000	2430000	1800000	1490000	1340000	1420000	1820000	1580000	1840000
A6X935	Itih4	1230000	1090000	1080000	1200000	1040000	1030000	1070000	1350000	978183	1370000	1440000	1130000	1270000	1370000
A6ZI46	Aldoart1	244000000	127000000	240000000	114000000	157000000	148000000	189000000	8610000	206000000	17400000	227000000	7510000	9510000	1390000
A7MCT6	Etnk2	972908	881280	1070000	979712	1190000	519234	960299	1220000	1040000	1060000	1130000	908472	889635	733672
A8DUK4	Hbb-bs	78000000	47200000	76900000	72300000	58900000	71100000	66000000	95200000	88600000	115000000	103000000	231000000	147000000	183000000
A9R9W0	Mup15	2410000	1760000	1200000	3250000	604646	5680000	866582	NA	NA	1580000	279509	1950000	1040000	NA
B1AQJ2	Usp36	243105	103865	271867	102708	800573	241731	191109	408490	254065	304360	270387	233760	374745	288299
B1AR13	Cisd3	2280000	2500000	2770000	2680000	1160000	1730000	1490000	2350000	2250000	2760000	2270000	1950000	2020000	1900000
B1AR69	Myh13	NA	NA	NA	NA	NA	NA	174580	NA	NA	NA	NA	NA	NA	NA
B1ART2	Vps13d	472315	NA	310952	407591	792059	524198	563534	645236	865316	503460	443170	482175	647996	456108
B1AUE5	Pex10	226023	276559	175172	157353	322944	297716	308456	217374	141546	179147	119292	224783	228190	NA
B1AUN2	Eif2b3	3030000	2260000	2610000	2990000	2980000	2950000	2180000	2280000	2020000	2120000	1980000	2030000	1960000	2570000
B1AUY3	Arhgap4	NA	NA	NA	NA	NA	NA	NA	NA	NA	NA	NA	NA	NA	NA
B1AVZ0	Uprt	517573	NA	385856	NA	361326	488763	NA	NA	479749	NA	667541	NA	NA	NA
B1AY10	Nfx1	1020000	1120000	809791	1270000	1110000	688591	725484	1160000	751277	990090	815148	966939	892653	682055
B1AY13	Usp24	669680	902102	636237	400994	879326	875077	822751	706716	858563	832997	679303	576793	491059	549674
B1AZ99	Otud3	NA	NA	NA	NA	NA	NA	NA	NA	NA	NA	NA	NA	NA	NA
B1AZI6	Thoc2	831879	1540000	720065	800053	683173	871561	617843	740657	692979	773326	796442	821305	1040000	806604
B1AZP2	Dlgap4	859626	480077	644388	578473	657424	459549	368991	NA	587307	506462	346351	500869	465164	341675
B2KF50	Uhrf1bp1	419301	737374	449695	451648	606355	476889	476018	640011	494308	574999	455789	449687	676811	386987
B2RPV6	Mmrn1	451882	NA	NA	411715	377677	387246	447520	209067	452568	NA	447401	299041	252240	263096
B2RQC6	Cad	1730000	1860000	1610000	1440000	1720000	1580000	1990000	1780000	1820000	1740000	1410000	1550000	1820000	1700000
B2RQG2	Phf3	929466	989567	789274	1010000	904940	921621	742641	835399	798174	968050	1040000	1040000	1200000	886335
B2RRE7	Otud4	715091	939565	614435	650405	691124	526216	437950	528071	473994	538711	400383	463238	425619	466547
B2RS76	Cpb1	NA	NA	NA	NA	NA	NA	NA	NA	NA	NA	NA	NA	NA	NA
B2RT14	Ugt1a5	3260000	1750000	2690000	2620000	5350000	3220000	3970000	3650000	2310000	2520000	2290000	3230000	3560000	2070000
B2RT54	Apol7a	441354	775166	337616	486788	866343	498353	613437	639153	521419	792276	367028	393738	648165	339152
B2RT89;Q96LX3	Slc22a28;Slc22a30	1780000	2090000	1800000	2500000	2100000	2070000	1660000	991090	1090000	1210000	980783	1240000	1940000	1800000
B2RUR8	Otud7b	550019	1280000	416179	1260000	250058	301697	NA	NA	282372	310292	205368	371575	451795	216348
B2RVL6	Zcchc24	79677.4	NA	75341	NA	192149	NA	NA	54684	NA	NA	NA	NA	NA	NA
B2RWS6	Ep300	94723.9	44084.7	93085.7	63289.4	113035	132086	107306	NA	122720	103227	82345.8	89821.1	119627	109937
B2RX12	Abcc3	1410000	1750000	2060000	1710000	1830000	1620000	1360000	1550000	1350000	1900000	1190000	1450000	1580000	1420000
B2RX14	Tut4	340773	340276	360767	409927	414099	355850	257928	586296	390570	310216	417162	389672	330393	427621
B2RXC1	Trappc11	589147	473420	484058	490647	470413	488776	433352	506927	558043	464991	541697	464305	542282	416219
B2RXC2	Itpkb	595271	656170	457264	264637	364889	206445	138232	282880	217580	313723	342400	537570	406688	264941
B2RXC6	Polr3a	727990	919518	NA	450154	1150000	775332	NA	NA	477791	301156	NA	NA	NA	NA
B2RXQ2	Ppfia1	1140000	920541	1170000	1080000	1240000	1400000	1290000	965914	1230000	1450000	1290000	2030000	1660000	1850000
B2RXS4	Plxnb2	1750000	2030000	1670000	2020000	2040000	2180000	1770000	1830000	1870000	1870000	1380000	1460000	1670000	2100000
B2RXZ2	Cyp2a22	NA	NA	NA	NA	NA	735569	NA	NA	NA	NA	NA	NA	NA	NA
B2RY04	Dock5	443538	302261	406604	356988	346531	281667	211892	227950	182613	229631	308277	282711	215819	184616
B2RY53	Gm6133	373530	94945.4	562841	NA	NA	384201	5370000	1790000	NA	1670000	2750000	1990000	1610000	NA
B2RY56	Rbm25	3640000	3550000	3090000	2710000	4270000	3220000	3440000	3160000	3660000	3520000	4090000	3470000	3770000	2920000
B5X0G2	Mup17	563377	771149	1640000	1360000	944693	1160000	688108	287658	508885	1240000	790192	326278	785620	674314
B7ZMP1	Xpnpep3	1300000	1210000	1670000	1290000	1280000	1260000	1010000	1740000	1220000	1610000	2530000	1590000	1220000	1580000
B8JJ69	2310061I04Rik	124610	NA	NA	NA	158351	196688	204187	190371	129553	266225	155882	188089	NA	181157
B8JK39	Itga9	670225	627231	354739	377472	328521	648900	435901	458602	307190	367278	316927	373954	313802	360193
B9EJ54	Nup205	261553	267848	267590	338868	214315	426404	90006.6	NA	213367	360609	322921	528996	452903	317424
B9EJ80	Pdzd8	460138	452623	441079	362662	322659	317864	243621	356473	436544	526152	451759	297920	270518	183341
B9EJ86	Osbpl8	3180000	1920000	2520000	2210000	2880000	2900000	2150000	3040000	1910000	2560000	2290000	2600000	4020000	2820000
B9EJR8	Dnaaf5	NA	NA	36829.3	NA	142595	18337	237604	152560	152218	NA	77354.3	93985.8	138138	67743.5
B9EKI3	Tmf1	538723	505751	610746	572704	673248	773109	587092	467969	548911	539553	650105	651495	703106	785655
C0HKD8;C0HKD9	Mfap1a;Mfap1b	555287	692879	528251	511340	357757	642096	591778	696398	569945	611515	656652	619711	703517	550283
C0HKG5;C0HKG6	Rnaset2a;Rnaset2b	1390000	1640000	2720000	2210000	891233	2350000	1730000	1560000	2930000	2210000	2430000	2520000	2130000	1830000
D0QMC3	Mndal	609122	771398	578980	572071	517478	611620	514898	549800	491807	505524	331171	753667	643083	509921
D3YUP5	Exoc3l2	618765	484455	712079	788716	980574	824701	742723	726180	1160000	1010000	794209	1010000	832036	1260000
D3YW26	Tada2b	256787	77124.2	NA	247489	122284	264729	189605	100166	152152	236687	171909	229401	223581	204420
D3YXF5	C7	3540000	3770000	2590000	3310000	2740000	3240000	2260000	4390000	2630000	3280000	2020000	3650000	2890000	2900000
D3YXJ5	Lratd2	NA	185308	NA	NA	NA	192028	NA	NA	138669	152000	42867.2	159698	75371.3	111872
D3YXK2	Safb	5580000	4120000	3300000	4400000	4760000	4450000	3620000	4700000	3640000	3790000	3620000	3350000	4600000	3670000
D3YYY8	Arhgef26	358778	381177	111091	194791	177682	77497.9	228422	168901	175708	285405	122872	215046	228656	182696
D3YZP9	Ccdc6	1340000	1130000	1200000	1120000	1210000	1170000	1330000	1210000	1270000	1270000	1090000	1350000	1320000	1240000
D3YZZ5	Tmed7	881824	512151	652447	762996	679850	687545	618002	1090000	742285	603578	658935	353513	593977	570637
D3Z0K6	Rsbn1l	217387	185416	NA	146621	188319	170007	193901	191814	136525	94844.1	169529	111954	153106	61437.8
D3Z0M9	Ddx23	2110000	1990000	1980000	2180000	2940000	2820000	2910000	2290000	2910000	2760000	2660000	2680000	3110000	2930000
D3Z1W5	Sult2a3	1150000	NA	1130000	863027	280855	1080000	1670000	NA	822190	NA	726155	NA	NA	NA
D3Z2H9	Tpm3-rs7	24700000	46800000	20400000	34800000	13200000	34100000	18900000	14000000	16500000	21000000	9320000	34700000	24500000	27100000
D3Z3L3	Trim12c	NA	NA	NA	NA	364044	NA	248257	239053	228775	362793	124142	NA	749994	357709
D3Z3N4	Hnrnph3	741011	494699	655346	905093	908409	430229	891084	893574	994313	999520	914154	509429	692954	934279
D3Z423	Rnf212b	NA	NA	172175	198699	286774	261668	293813	298731	198552	232287	313453	373999	436410	364195
D3Z5G7	Ces1b	1380000	NA	304655	436174	496554	256609	686965	507156	409205	399369	341099	563723	359968	402483
D3Z6Q9	Bin2	NA	NA	NA	NA	NA	NA	NA	NA	NA	NA	NA	116874	NA	212186
D3Z7P3	Gls	NA	NA	82890.9	NA	91220.6	NA	NA	147726	90650.5	92314.8	86909.9	NA	NA	95338.2
D3Z7Q2	Smim20	475049	729880	525565	469700	713972	501977	904162	NA	592524	626919	642344	932138	642952	984841
D3Z7X0	Acad12	249508	357043	613362	452519	NA	231559	447057	411239	396745	570537	544215	442408	435087	530239
D4AFX7	Dnajc13	3400000	4080000	2880000	4440000	3860000	3920000	3470000	2940000	3360000	3460000	2520000	2830000	3120000	3170000
E0CZ22	Mroh1	148588	185532	302204	204004	274361	225397	187730	183659	104149	164701	117940	NA	182301	NA
E9PUR0	Ankhd1	724568	392198	725887	524347	718586	575094	460868	721474	504102	509716	517977	639279	386438	553451
E9PV24	Fga	38900000	33000000	29700000	32900000	23800000	35800000	35800000	43300000	39600000	44400000	46000000	60800000	53600000	51900000
E9PV38	Ces2g	2420000	1650000	2890000	3010000	3760000	3000000	3250000	3610000	2970000	2410000	3150000	1940000	2620000	1530000
E9PVA8	Gcn1	3590000	3280000	3700000	3500000	3740000	3770000	3350000	2730000	2630000	2710000	2550000	2240000	2680000	2750000
E9PVB5	Ttc17	335647	104168	354211	157426	693391	373543	600151	405004	512166	305889	354063	343521	469678	358274
E9PVZ8	Golgb1	1420000	1400000	1560000	1440000	1710000	1570000	1600000	1300000	1450000	1450000	1490000	1350000	1380000	1310000
E9PWH2	Card6	477379	854163	289049	764190	518950	656478	262299	444083	291200	427730	376242	443116	423897	NA
E9PWQ3	Col6a3	3260000	5350000	3520000	5410000	7140000	5300000	5040000	3420000	4630000	7250000	4260000	4370000	7000000	6860000
E9PWR4	Dip2c	485827	414387	582303	396547	539231	580418	421397	438515	375616	470300	382925	449320	513960	519340
E9PWW9	Rsf1	1170000	1520000	955471	1010000	653036	1010000	752355	955522	859012	896422	795876	857112	1040000	842806
E9PX68	Slc4a1ap	1120000	1560000	573096	794151	1010000	1160000	1080000	1190000	748081	880316	1010000	1050000	995344	1180000
E9PXC0	Srp54c	NA	NA	NA	NA	172830	119769	126907	NA	76488.2	NA	NA	88538.2	NA	NA
E9PXC3	Cyp2c69	1120000	NA	NA	NA	5940000	NA	6290000	4230000	5920000	4510000	3800000	NA	NA	3420000
E9PY03	Tstd1	245916	290264	186603	507806	340392	322739	330907	249661	399418	459909	599786	447286	447941	428416
E9PYD1	Fam98c	NA	NA	260247	NA	724317	131587	588822	268664	669176	240271	252029	527000	395822	379896
E9PYF4	Lmo7	1670000	2080000	1310000	1220000	1550000	1570000	1610000	1580000	1460000	1710000	1610000	1690000	1560000	1310000
E9PYF7	Ap1ar	NA	NA	302433	NA	384574	305837	536452	NA	554097	389752	366379	NA	348319	1280000
E9PYG6	Rasa1	682239	552299	576589	705408	922386	809113	739111	617427	895965	569507	679826	523902	486382	975890
E9PYH6	Setd1a	159353	215055	126797	106260	123304	62651.5	60961.5	87694.5	153549	119736	80131	NA	106580	61622.3
E9PYK3	Parp4	1390000	1480000	996631	1150000	1470000	1070000	1410000	1570000	1500000	1210000	853299	1230000	1040000	1250000
E9PYP1	Ces1a	2310000	2660000	1280000	1960000	680337	1310000	641678	2190000	936999	691651	670752	609547	NA	314926
E9PZJ8	Ascc3	507825	596201	503473	594115	531119	561926	506820	531520	469791	472951	372581	398689	532036	386904
E9PZM7	Scaf11	837444	896449	715791	817393	588678	582906	759976	599775	692759	799544	657620	473266	927695	480139
E9PZP8	Herc1	146451	NA	NA	129974	NA	NA	NA	210575	109860	NA	NA	NA	120611	105985
E9PZQ1	Ddx60	NA	NA	NA	NA	NA	NA	NA	NA	NA	NA	NA	NA	NA	NA
E9Q0F0	Krt78	576995	718536	218001	517995	476172	322077	578398	413059	587026	2000000	489323	639887	336918	440341
E9Q0S6	Tns1	3780000	4290000	3920000	2970000	3800000	2740000	2240000	3270000	2650000	3430000	3440000	3000000	2790000	2340000
E9Q137	Tex264	1290000	1150000	1250000	1190000	1170000	1240000	817809	649669	683686	546405	476333	614502	510447	368299
E9Q166	Atad2b	524427	1060000	417397	560782	434794	137337	299820	384300	189112	316979	366110	267216	242489	241435
E9Q1A5	Zfp384	158436	155945	98608.7	84015.5	174800	117388	72858.5	252830	214041	244374	198983	NA	182957	174597
E9Q1P8	Irf2bp2	135709	NA	132240	NA	361841	NA	167335	126009	212303	276668	271822	NA	152267	99658.7
E9Q238	Kank1	808852	722089	796914	837947	862291	885746	857351	820993	836882	725312	726478	771927	876962	701776
E9Q2C0	Cfap46	408661	NA	469373	30204.6	475870	635098	556508	572320	399540	827037	432881	749275	908708	724428
E9Q2E4	Hectd4	107508	159323	133618	80776.3	132010	92910.7	135919	88546.3	182678	111390	90558.9	143612	75479.7	133089
E9Q394	Akap13	897280	879568	844505	865784	999915	885580	797812	865462	801592	945224	949243	886666	789544	703011
E9Q3C1	C2cd2	2180000	2260000	2220000	2500000	2650000	2320000	2100000	2360000	2260000	2450000	2220000	2290000	2630000	2270000
E9Q3G8	Nup153	3280000	3790000	3000000	2980000	2470000	2230000	1930000	3170000	2970000	2840000	2900000	2950000	2730000	2090000
E9Q3L2	Pi4ka	497334	483023	451512	413871	522408	507566	227734	396509	NA	328062	NA	322684	435851	406905
E9Q3L4	Ifi207	205092	280676	319330	176865	119820	283227	268655	NA	273417	324777	231893	296966	287617	314973
E9Q3R9	Zbtb21	373157	494416	408378	496764	278034	59024.4	339737	186613	316442	262037	244392	161609	153278	223712
E9Q411	Nbas	305923	397774	378051	433598	456877	421174	460338	331210	408646	371442	451512	288376	297691	437434
E9Q414	Apob	6280000	6590000	5070000	5690000	6270000	6560000	6700000	7040000	6200000	5870000	4680000	5190000	6320000	6180000
E9Q4N7	Arid1b	298375	304025	117256	NA	106570	120349	134045	NA	144318	143077	109328	238908	174646	167498
E9Q4Z2	Acacb	2100000	1970000	1880000	1850000	3170000	2180000	1770000	1590000	1550000	1310000	1230000	1060000	1410000	1610000
E9Q512	Trip11	2120000	3030000	2680000	2640000	3110000	3080000	3530000	2570000	3610000	3140000	3160000	3440000	3590000	2980000
E9Q555	Rnf213	1710000	1690000	1380000	1750000	1450000	1450000	1070000	1170000	1070000	1080000	823774	870029	974324	1050000
E9Q557	Dsp	2310000	2570000	2730000	2850000	3050000	3240000	3230000	2920000	3170000	3160000	3090000	3330000	3830000	3220000
E9Q593	Cyp2b23	NA	NA	NA	NA	NA	NA	NA	76500.3	NA	NA	NA	NA	NA	119645
E9Q5C9	Nolc1	5840000	9290000	4390000	6550000	4380000	4800000	3200000	5030000	5060000	4470000	4820000	4820000	5290000	3830000
E9Q5K4	Cyp2c23	3660000	3950000	4400000	3900000	4310000	4520000	5390000	4540000	4990000	4220000	4200000	3610000	4390000	4150000
E9Q5K9	Ythdc1	521671	390513	318452	286754	565289	408464	235709	371524	399978	332716	266548	233668	347554	360340
E9Q616	Ahnak	4390000	5240000	4350000	4310000	6830000	4530000	4110000	4530000	5510000	6210000	5340000	5780000	5950000	5050000
E9Q634	Myo1e	1180000	1370000	1210000	1140000	1380000	1040000	1230000	1210000	1420000	1040000	1440000	974136	1120000	1080000
E9Q6B2	Ccdc85c	42245.3	NA	112848	157455	123134	134471	160074	NA	101839	116817	167777	122879	NA	NA
E9Q6D8	C6	8030000	3360000	6050000	5910000	4870000	6400000	7630000	5390000	6900000	5640000	5050000	5970000	4500000	6340000
E9Q6H8	Plekha5	1870000	1780000	1390000	1550000	1530000	1710000	1090000	1580000	1130000	1300000	1220000	1510000	1490000	1260000
E9Q6J5	Bod1l	464890	591702	330240	413686	275706	326360	274519	377753	369142	331590	330113	338467	394199	233953
E9Q6R7	Utrn	1500000	1550000	1630000	1460000	1900000	1790000	1800000	2040000	2020000	1920000	1910000	1950000	2010000	2090000
E9Q735	Ube4a	1180000	1180000	1140000	1200000	1320000	1110000	1120000	1100000	980484	1040000	768789	707556	1080000	979154
E9Q784	Zc3h13	210553	341384	173754	301295	157179	448697	NA	286206	NA	NA	171054	NA	NA	NA
E9Q7D5	Arhgef5	307601	339882	332087	231156	486382	249935	248445	185529	331631	NA	324011	NA	NA	NA
E9Q7F2	Rnf169	412086	344422	281354	274409	386583	382548	422511	282043	521717	403854	440734	493092	555887	488222
E9Q7G0	Numa1	2370000	2220000	2210000	2060000	3060000	2660000	2500000	2860000	2730000	2450000	2700000	3060000	2800000	2580000
E9Q842	Nav2	207848	299977	216623	121741	193102	125179	142382	163387	NA	131434	222227	NA	NA	137294
E9Q8B5	Cfhr4	2100000	2150000	1630000	2040000	1950000	2680000	2260000	1860000	1940000	1570000	1140000	1200000	1310000	1240000
E9Q8D0	Dnajc21	698264	788391	852813	734471	835327	730240	855889	554593	524569	489410	426182	524751	683270	448968
E9Q8I7	Nfxl1	243059	277732	138729	151768	180563	397546	NA	NA	176022	NA	NA	198186	294523	NA
E9Q912	Rap1gds1	NA	300967	293713	NA	304662	365393	376838	199682	286893	372002	447197	243012	453409	329830
E9Q9B7	Kidins220	323108	431078	431753	335523	285605	342970	355651	337823	317927	337613	371603	304967	374995	349729
E9QA15	Cald1	13100000	16900000	9730000	13600000	7920000	10700000	7660000	9850000	8720000	8630000	8770000	9770000	10000000	9950000
E9QAE3	Btaf1	258775	299779	366454	319335	301771	305122	319823	434025	322165	329701	185399	378283	393887	322223
E9QAM5	Helz2	1340000	1110000	982940	1010000	1470000	1320000	1360000	1140000	1240000	1070000	872992	1100000	930528	1040000
E9QAP7	Taf4	443121	581864	469880	647419	302605	536486	238767	213578	323250	301634	400295	533825	377228	390477
E9QAT4	Sec16a	4260000	3100000	3580000	3040000	3230000	3010000	2240000	3800000	3140000	3200000	3450000	2860000	2950000	2630000
F2Z3U3	Raph1	2000000	1890000	1440000	1560000	1570000	1210000	752730	1670000	1010000	1110000	1160000	1080000	850778	851730
F2Z472	Svs3a	NA	243896	NA	NA	NA	572543	NA	NA	NA	NA	279827	928777	290987	NA
F6RWR5	Gstp3	NA	NA	NA	NA	NA	NA	NA	NA	NA	NA	NA	NA	NA	NA
F6TQW2	Ighg2c	4550000	1390000	2660000	2000000	2180000	1670000	2940000	9800000	6260000	1730000	1410000	1640000	3050000	5240000
F6TUL9	Vsig4	NA	NA	NA	NA	NA	NA	NA	NA	NA	NA	NA	NA	NA	NA
F6U5V1	Larp1b	1180000	1050000	714987	784814	886950	598583	498538	1020000	672259	703247	701952	642396	599399	693685
F6XJP7	Pcsk6	1420000	1570000	908037	848159	1110000	1220000	1050000	804762	872484	550192	699461	988550	758772	1110000
F6Z9B9	Ces2h	544563	538567	650078	771557	231829	752818	210077	219915	310647	426146	206024	679586	801125	569806
F6ZDS4	Tpr	2450000	2290000	2350000	2180000	2580000	2520000	2670000	2800000	3420000	2980000	2890000	3180000	3260000	3050000
F7ABZ6	Dnah10	431731	392454	325316	486498	284231	378925	333457	404502	417886	469478	471562	458004	555064	597833
F8VPK0	Ttc37	535094	1050000	611689	502225	544431	415710	553796	369835	386117	489675	445767	309276	421783	335745
F8VPN4	Agl	11600000	11300000	11400000	10600000	15200000	10700000	11700000	12900000	12400000	12500000	9440000	7660000	11700000	7240000
F8VPP8	Zc3h7b	623112	285648	357106	651470	527588	715126	580949	435747	403931	410602	641866	696242	455936	502725
F8VPU2	Farp1	1150000	1340000	874625	682082	1240000	1260000	1090000	1370000	1400000	1170000	767232	1170000	844637	1010000
F8VPX2	Fbxw9	130947	NA	116332	167855	NA	187802	NA	NA	199413	NA	NA	NA	NA	100428
F8VQ05	Fryl	375269	341234	351213	345657	318133	290487	195714	228145	232584	552149	496799	210554	251845	354020
F8VQC1	Srp72	2520000	1760000	3050000	2220000	4260000	2510000	3350000	2850000	2660000	2700000	2610000	2350000	1850000	2750000
F8VQG7	N4bp2	119360	NA	100502	114048	119203	203575	46815.4	89655.6	63386.9	125750	101384	103746	139306	75644.7
F8VQK3	Gucy1a2	118094	114144	86966	NA	78584.1	74260.9	89686.8	87125.1	32763.4	NA	NA	NA	NA	114648
G3UW40	Mcc	496519	438107	476840	241921	424621	568674	494247	399512	524684	566917	486057	609465	711688	592921
G3UW82	Myh2	NA	NA	NA	NA	NA	NA	NA	NA	NA	NA	NA	NA	NA	NA
G3X8U3	2210016F16Rik	1800000	1350000	2100000	1500000	2190000	1500000	1920000	1880000	1400000	2070000	2430000	2230000	2020000	2130000
G3X8X0	Dhx16	NA	NA	NA	NA	NA	NA	68193.7	109334	NA	126846	NA	NA	66475.2	NA
G3X972	Sec24c	9730000	6970000	6560000	6870000	7590000	7610000	8440000	6260000	7260000	6570000	6240000	6040000	6260000	6130000
G3X982	Aox3	27600000	28500000	25700000	30500000	27200000	33400000	27600000	19300000	19200000	17800000	13400000	15300000	18600000	18200000
G3X9B1	Heatr1	NA	129259	152281	319448	NA	NA	NA	NA	NA	NA	NA	NA	NA	NA
G3X9C2	Nccrp1	NA	NA	NA	NA	NA	NA	NA	NA	NA	NA	NA	NA	NA	NA
G3X9D6	Apon	444484	404337	182419	397774	293575	324320	NA	NA	140133	168553	185953	197250	159099	150275
G3X9K3	Arfgef1	230145	288499	305520	450042	451241	440941	617905	574992	363385	410014	390673	243747	383771	446846
G3X9V8	Serpinb3a	NA	NA	NA	77896.5	458794	NA	NA	NA	NA	NA	NA	NA	NA	NA
G3X9Y6	Akr1c19	621434	757187	1780000	530065	1530000	882643	1780000	1530000	1780000	1890000	2320000	1350000	1280000	1340000
G3X9Z4	Pcf11	1690000	1700000	2500000	1770000	1970000	1120000	NA	2250000	1950000	2080000	2120000	2210000	2240000	1570000
G5E829	Atp2b1	839679	725255	657509	732549	681512	737840	651306	932748	665517	811730	483501	556132	811333	761576
G5E870	Trip12	596065	911785	670452	716910	524537	445951	279650	444061	501093	411323	472276	559738	525938	353711
G5E897	Poglut3	552728	510303	528754	607814	885540	469289	828031	506031	776862	646132	678235	478843	515436	600729
G5E8K5	Ank3	1900000	1810000	1810000	1710000	2090000	2210000	2120000	2360000	2460000	2400000	2540000	2040000	2090000	2380000
G5E8P1	Brd1	NA	NA	32344.1	NA	92179.2	28862.8	93670.9	56219.2	96453.9	86789.4	73704	89031.7	142398	132820
G5E8Q8	Adgrf5	208872	147077	185191	213936	231138	279015	307591	249411	182527	148513	253943	169409	323642	162612
G5E8V9	Arfip1	299963	361684	663769	390362	445023	404966	332104	399335	358687	419095	673445	373935	367994	401987
G5E904	Sult3a2	NA	NA	NA	NA	NA	NA	NA	NA	NA	NA	NA	NA	NA	NA
J3QNH8	Gm7694	867505	272509	447653	686732	985165	974073	490916	950398	501676	517309	927913	1190000	893235	987234
K7N6C2	Cyp2c68	576093	574528	270088	485934	399009	507653	487911	446254	474474	379144	469727	383104	494724	454196
K7N6K9	Sult2a5	NA	NA	NA	NA	NA	NA	NA	NA	NA	NA	NA	NA	NA	NA
K9J7B2	Ugt1a6b	2990000	3130000	2600000	3930000	4170000	3840000	3370000	2840000	2770000	2760000	2370000	1920000	2620000	1820000
L7N463	Cyp2d34	NA	NA	NA	NA	55497.2	NA	NA	46069.5	70193.2	74102.6	NA	33176.6	58910.2	NA
L7N466	Mthfsl	571877	489472	900815	782250	249504	576362	299324	701987	554922	916032	937186	1180000	830213	1120000
O08528	Hk2	NA	NA	NA	NA	NA	NA	NA	NA	NA	NA	NA	NA	NA	32122
O08529	Capn2	1730000	1450000	1680000	1650000	2060000	1680000	2030000	1810000	1520000	1640000	1120000	764959	1540000	1380000
O08532	Cacna2d1	NA	NA	NA	NA	NA	NA	NA	NA	NA	NA	NA	NA	NA	NA
O08539	Bin1	1620000	2000000	1340000	1730000	1440000	1440000	1380000	1750000	2280000	1890000	2340000	1620000	1590000	1930000
O08547	Sec22b	8480000	7640000	6550000	8450000	12000000	8210000	7900000	7800000	6410000	6420000	7150000	6710000	5710000	7100000
O08550	Kmt2b	193988	193810	183680	171674	155209	80574.2	139139	NA	209075	189300	191870	199894	226670	NA
O08553	Dpysl2	3330000	3010000	3080000	3630000	4800000	3810000	4400000	3700000	3820000	3570000	3840000	3650000	3560000	3910000
O08573	Lgals9	4990000	3300000	5240000	4770000	4970000	4690000	4970000	4770000	4820000	5030000	7080000	4320000	5100000	3180000
O08579	Emd	389475	353668	274008	332676	319542	195524	295454	219852	377375	240640	359945	183910	184520	357087
O08580	Esrra	NA	NA	NA	NA	120600	NA	134982	NA	NA	NA	NA	NA	NA	NA
O08582	Gtpbp1	669777	451836	432624	527732	618749	520942	605605	737740	489734	446297	467346	335906	503519	633019
O08583	Alyref	2160000	3330000	4060000	3930000	3660000	3520000	2500000	3440000	3100000	3930000	3960000	3160000	3820000	3190000
O08585	Clta	9110000	11400000	16000000	11800000	6000000	8900000	9780000	3660000	10100000	7130000	12100000	6550000	4660000	8520000
O08586	Pten	412195	261208	190540	324757	445774	399240	555503	446181	394941	420374	258274	NA	393251	399378
O08599	Stxbp1	271379	376693	327811	270320	415218	334693	398375	430398	405460	500871	524608	397618	377367	479706
O08600	Endog	5830000	6460000	6730000	7490000	5290000	5970000	6540000	6220000	6180000	9200000	10100000	11400000	10000000	8330000
O08601	Mttp	45100000	39400000	37500000	46900000	71700000	56700000	57300000	56000000	52200000	48000000	36100000	33800000	41000000	44800000
O08605	Mknk1	443816	307334	346107	370296	377843	655490	458621	342338	NA	357133	454629	475713	172656	345577
O08609	Mlx	409613	225073	395562	193090	720683	344146	627411	355293	501795	440179	393268	365637	435720	459725
O08638	Myh11	2280000	3830000	2960000	4240000	2430000	6280000	2180000	2280000	3150000	2740000	3160000	4580000	3660000	4150000
O08663	Metap2	2610000	2200000	2220000	2050000	2980000	3030000	3240000	2830000	2640000	2460000	1900000	1870000	2470000	2580000
O08677	Kng1	9340000	8810000	6470000	7040000	7170000	7820000	8250000	13100000	11000000	10300000	7360000	8050000	7670000	8100000
O08692	Ngp	2140000	3280000	1440000	3470000	1200000	2640000	2390000	1750000	2520000	1970000	3440000	3060000	3370000	3300000
O08705	Slc10a1	436639	227908	NA	110112	144556	NA	NA	NA	66650.2	NA	86618.4	NA	NA	NA
O08709	Prdx6	15200000	17600000	27800000	16900000	10400000	12500000	11400000	12200000	10700000	16100000	15500000	23000000	22100000	16600000
O08715	Akap1	7560000	6490000	7220000	6220000	6900000	5650000	3980000	5210000	4700000	4270000	4480000	4860000	3880000	3700000
O08717	Inhbe	329306	392085	441430	312494	147698	344518	269410	NA	NA	118872	NA	NA	85643.1	286810
O08738	Casp6	870601	1450000	1260000	1430000	1480000	970402	1130000	1060000	1350000	1470000	1600000	1320000	1180000	1330000
O08749	Dld	37300000	32300000	34600000	30500000	44600000	37700000	38900000	46500000	50700000	34900000	36000000	31100000	35100000	39000000
O08756	Hsd17b10	4790000	4870000	6090000	4910000	5510000	4560000	5430000	6040000	5030000	5790000	6480000	4830000	4070000	4760000
O08759	Ube3a	610969	806482	644907	959859	831131	882794	965528	463765	705237	701476	631274	548743	729579	454603
O08784	Tcof1	2230000	2950000	895877	1780000	1750000	1610000	961302	1740000	1380000	1650000	1590000	2560000	1630000	1470000
O08788	Dctn1	3230000	2930000	2950000	3250000	3570000	3460000	3390000	3360000	3150000	3570000	3440000	2910000	3440000	3520000
O08795	Prkcsh	36200000	37900000	34000000	35500000	25300000	38900000	29900000	20800000	29300000	22700000	21700000	31100000	33400000	26300000
O08796	Eef2k	NA	NA	NA	NA	749226	399636	687624	NA	267649	NA	NA	222075	355377	NA
O08797	Serpinb9	311993	426041	562135	588105	241931	351276	NA	122991	284905	487848	241070	NA	231662	149533
O08800	Serpinb8	NA	NA	151744	NA	NA	NA	NA	NA	NA	NA	NA	NA	NA	NA
O08807	Prdx4	5210000	3740000	6790000	5180000	6290000	5480000	7150000	8010000	5720000	8420000	8580000	5400000	6740000	7830000
O08808	Diaph1	1390000	1090000	1250000	1050000	1250000	867849	993600	1150000	918843	1070000	1120000	1190000	887938	914520
O08810	Eftud2	1990000	2100000	1810000	2200000	2090000	1710000	2120000	2110000	2030000	2580000	1920000	1910000	2480000	2250000
O08848	RO60	NA	NA	156862	NA	NA	82616.8	78142.5	64879.3	70330	NA	NA	NA	NA	NA
O08856	Ell	371094	478713	256628	292931	419972	506357	167345	380723	361136	346212	214074	588834	316812	354465
O08908	Pik3r2	NA	NA	NA	NA	76865	NA	60189.7	NA	104599	92068.3	54184.4	33956.8	41929.4	29244.4
O08911	Mapk12	NA	NA	NA	NA	NA	NA	NA	NA	41046.2	NA	NA	NA	NA	NA
O08914	Faah	6930000	5410000	6420000	4840000	6450000	6590000	6580000	5710000	5390000	4960000	3330000	4090000	4800000	3800000
O08915	Aip	1730000	1220000	2500000	1680000	1080000	1380000	1990000	2070000	2150000	2290000	2520000	2590000	3100000	2620000
O08917	Flot1	1390000	1300000	1710000	1710000	1580000	1320000	1580000	2310000	2300000	2210000	2360000	2600000	1920000	1980000
O08966	Slc22a1	3230000	3350000	3070000	3130000	2450000	3160000	3210000	2190000	1760000	1560000	1550000	2050000	2230000	2710000
O08967	Cyth3	1310000	785713	656745	1300000	1620000	1220000	NA	1490000	948755	903104	1050000	1070000	1050000	1260000
O08983	Hps1	803632	570330	616959	683116	930143	581657	411626	1130000	1390000	965019	1750000	1020000	1130000	1490000
O08992	Sdcbp	112344	178398	87459.3	133582	180458	202098	197486	299476	143320	136331	NA	142286	116626	175763
O08997	Atox1	1480000	1370000	1980000	988625	2360000	1510000	2610000	1590000	2930000	3420000	1940000	2290000	2290000	1920000
O09000	Ncoa3	64751.2	NA	NA	48558.7	53402.1	NA	NA	NA	105751	73029.3	NA	NA	NA	NA
O09012	Pex5	2200000	2950000	3310000	2470000	3420000	2680000	2530000	2670000	2320000	3050000	2920000	2040000	1620000	2490000
O09043	Napsa	529176	NA	177258	188949	278188	349400	343245	291837	483251	402001	215728	529502	483355	271377
O09044	Snap23	1040000	853426	865700	840339	1100000	893970	839425	882038	863567	950730	805236	626790	810780	761984
O09061	Psmb1	3270000	3350000	4370000	3340000	4190000	2600000	3690000	3460000	2740000	3280000	3650000	2900000	2920000	3590000
O09106	Hdac1	536578	941132	407867	330810	510302	580024	829020	286569	687194	572969	341934	347769	536209	607273
O09110	Map2k3	886707	826275	741727	740532	858982	1000000	807317	377972	625908	601654	538750	670919	494481	417149
O09111	Ndufb11	2130000	1570000	1810000	2000000	1180000	1850000	1340000	2160000	1390000	1810000	2040000	1640000	2410000	1220000
O09112	Dusp8	565829	244231	159296	655076	248754	558952	340769	186289	211652	250635	212813	510631	353153	372048
O09114	Ptgds	NA	NA	88247.4	NA	NA	NA	147520	198805	260496	145607	218284	158848	NA	153503
O09130	Nfatc2ip	350834	287676	419835	368687	185038	292907	211739	301338	NA	302510	277111	231302	335558	319544
O09131	Gsto1	13600000	15100000	20700000	14500000	10600000	11400000	11000000	10400000	13100000	13500000	17400000	14900000	12400000	10300000
O09158	Cyp3a25	1650000	1720000	1370000	1280000	1580000	1250000	1310000	1690000	1400000	1410000	1380000	1290000	1690000	1380000
O09159	Man2b1	2150000	2220000	2020000	2240000	2550000	2330000	3090000	3460000	3730000	3540000	3580000	3320000	3780000	3850000
O09164	Sod3	874416	1390000	622312	984508	755573	990669	983714	695490	942395	1200000	970063	999396	1330000	1220000
O09167	Rpl21	149000000	157000000	123000000	126000000	63200000	145000000	97200000	84900000	89400000	103000000	69900000	129000000	140000000	132000000
O09172	Gclm	2440000	1930000	3860000	1490000	3700000	2420000	4310000	4280000	4160000	3330000	4770000	3770000	3630000	4240000
O09173	Hgd	31600000	20000000	30100000	26200000	40500000	30800000	39900000	31000000	28200000	30700000	28200000	20300000	26200000	25100000
O09174	Amacr	27300000	24500000	41900000	23900000	31500000	26700000	36700000	34300000	28000000	40500000	34700000	38600000	29400000	38300000
O19441	H2-Q1	NA	1940000	NA	547515	NA	NA	NA	NA	NA	NA	NA	NA	NA	NA
O35071	Kif1c	712118	1100000	783525	1270000	1150000	1290000	1310000	823069	1360000	659203	905369	1140000	1180000	966524
O35074	Ptgis	NA	NA	NA	NA	NA	96858.7	NA	NA	NA	NA	NA	NA	NA	NA
O35075	Vps26c	209428	150721	261604	146290	531271	337115	400110	382544	247065	322659	406941	339976	301346	322036
O35083	Agpat1	133722	195493	105734	140108	129704	190472	92938.2	141329	115475	75793.9	118944	NA	NA	108532
O35099	Map3k5	330459	NA	142081	139774	486606	383377	484614	827336	223563	280457	310644	348043	220661	382117
O35114	Scarb2	2870000	2960000	2460000	3210000	2440000	2500000	2780000	2560000	2790000	3170000	1920000	2010000	2730000	2060000
O35129	Phb2	3570000	2440000	9540000	4390000	4770000	3850000	7020000	4450000	5990000	8220000	8680000	8250000	7560000	5440000
O35134	Polr1a	506259	138537	NA	284768	340724	300017	345405	431181	370658	354594	329221	444258	434562	537354
O35143	Atp5if1	NA	19405.7	NA	58557.1	NA	NA	NA	NA	NA	NA	NA	7182.11	9844.39	NA
O35144	Terf2	173288	294692	598843	95995.6	201826	298318	226110	213027	275664	271552	274835	292289	320893	275886
O35153	Bet1l	446509	569106	524325	350728	424199	475996	NA	647747	345707	NA	357619	429690	336161	516437
O35166	Gosr2	1220000	1000000	1320000	1260000	1420000	1450000	1590000	1030000	1230000	1410000	1510000	1280000	1580000	1630000
O35206	Col15a1	NA	NA	NA	NA	NA	NA	NA	NA	NA	NA	NA	NA	NA	NA
O35215	Ddt	15100000	12100000	14500000	12600000	9110000	11900000	12000000	13800000	17100000	15000000	17100000	24300000	20500000	15400000
O35218	Cpsf2	899339	829344	597842	684735	1150000	1060000	982285	878596	821477	640680	636349	760945	902891	1030000
O35226	Psmd4	5990000	6040000	7720000	7160000	7930000	5480000	5500000	4790000	5730000	6350000	5900000	6250000	5140000	5970000
O35231	Kifc3	238937	NA	46223.4	267455	204073	181358	178144	70412.1	194827	NA	90906.4	NA	81239.8	134265
O35239	Ptpn9	307532	NA	405970	468639	441373	NA	390617	454438	479771	525791	356832	433877	426084	276517
O35250	Exoc7	611247	365679	612028	620031	953736	630415	884545	722025	667440	979401	820498	844332	479587	818549
O35286	Dhx15	3080000	3050000	2230000	2910000	3260000	3090000	3050000	3370000	3260000	2550000	2800000	2970000	3320000	2380000
O35295	Purb	1320000	1830000	1460000	1430000	1530000	1560000	1270000	1350000	846093	1180000	916142	1000000	1230000	1190000
O35309	Nmi	475642	641361	1200000	1450000	1140000	586229	1070000	774074	902554	947447	821227	651595	450169	934642
O35326	Srsf5	2650000	2420000	1850000	2450000	2420000	3160000	2580000	2830000	2270000	2800000	2530000	2410000	3550000	2390000
O35343	Kpna4	NA	NA	171979	NA	249874	NA	253533	NA	163556	94744.4	69267.7	75286.3	49369	51454.1
O35344	Kpna3	1170000	4670000	1350000	1790000	1870000	1390000	1760000	1140000	1470000	1510000	1520000	1040000	1180000	1790000
O35345	Kpna6	372788	NA	660151	568118	418127	545349	637068	616784	578925	504981	613938	529796	545800	414240
O35350	Capn1	2430000	1990000	2550000	2350000	2650000	2780000	1950000	2090000	1900000	1680000	1630000	1650000	1930000	2180000
O35381	Anp32a	7070000	7640000	7500000	6760000	9710000	8230000	9530000	7950000	11800000	11000000	6610000	7250000	10600000	8800000
O35382	Exoc4	760730	680977	772651	897199	999387	805360	864790	732919	904998	727289	815949	888959	873667	1030000
O35386	Phyh	4960000	4090000	7890000	5510000	7230000	5520000	7290000	6050000	6150000	6290000	6270000	5410000	5310000	5610000
O35387	Hax1	1940000	1030000	1040000	874358	1240000	1440000	1900000	1590000	1800000	1600000	933011	1840000	1330000	2420000
O35403	Sult3a1	NA	NA	1260000	NA	NA	NA	NA	NA	4380000	NA	2290000	NA	NA	3910000
O35405	Pld3	1690000	2030000	1390000	1750000	996225	1120000	1440000	2660000	2410000	1840000	1630000	1670000	1740000	2390000
O35423	Agxt	13100000	15200000	16000000	16000000	20700000	14000000	19800000	10400000	16800000	18500000	19800000	15200000	13600000	12000000
O35425	Bok	NA	241018	196231	150564	112985	NA	NA	NA	148315	143335	103352	110360	198192	255688
O35435	Dhodh	277721	NA	596398	378976	201463	605634	299986	405753	472541	434013	637736	606972	703624	508870
O35448	Ppt2	NA	NA	NA	NA	140658	NA	74549.6	243738	234186	245057	198110	342208	NA	145142
O35450	Fkbpl	NA	168591	237575	NA	NA	NA	NA	136023	NA	NA	NA	NA	86306.1	NA
O35453	Hpn	755957	820686	843404	735684	1010000	803273	1240000	1080000	972405	693758	602968	495821	687563	695624
O35459	Ech1	7380000	7550000	12300000	8980000	10900000	9090000	12200000	13300000	15500000	18800000	20100000	14200000	15000000	15500000
O35465	Fkbp8	2990000	2270000	3690000	3090000	4110000	3940000	4820000	3210000	3330000	4450000	4820000	4120000	3810000	4210000
O35488	Slc27a2	14000000	14400000	12000000	15000000	11600000	15100000	9910000	9930000	8780000	8440000	6500000	6680000	9770000	6820000
O35490	Bhmt	583000000	392000000	698000000	576000000	530000000	517000000	508000000	394000000	401000000	452000000	416000000	295000000	325000000	349000000
O35492	Clk3	NA	NA	NA	NA	NA	NA	NA	NA	NA	NA	NA	NA	NA	NA
O35516	Notch2	56629.6	37047.6	68694.1	NA	124454	70112.3	113725	NA	84739.4	171053	249545	74192.3	60924	NA
O35551	Rabep1	329207	291509	482723	280551	625134	520132	564629	NA	560027	579079	764825	463754	NA	500248
O35593	Psmd14	492252	570005	643526	525371	880544	402808	775697	958191	582602	901860	1300000	1080000	898434	570871
O35598	Adam10	638953	657791	582742	551684	779351	701444	690111	827992	813517	667433	541827	602985	982604	726788
O35601	Fyb1	318648	454096	276194	204483	344944	209881	312369	410392	360867	309969	157535	263020	231162	553597
O35604	Npc1	1680000	795934	1120000	1430000	1920000	1560000	1530000	1630000	1710000	1400000	1240000	1490000	2000000	1220000
O35609	Scamp3	5490000	3250000	3500000	3720000	4760000	4390000	3040000	3300000	3730000	2790000	2570000	2780000	2590000	2400000
O35613	Daxx	NA	NA	171212	NA	119275	NA	NA	355749	85227.8	314286	156324	173271	233347	215009
O35615	Zfpm1	316290	309289	234035	295491	291313	306633	225524	239568	177773	242137	179752	223742	191906	217220
O35623	Bet1	195690	209206	204064	300380	368759	400071	434604	519323	386220	297426	253769	269977	346859	425940
O35632	Hyal2	NA	NA	NA	NA	NA	NA	NA	NA	NA	NA	NA	NA	NA	NA
O35638	Stag2	NA	NA	NA	NA	NA	NA	NA	NA	NA	NA	NA	NA	NA	NA
O35639	Anxa3	3170000	2720000	3640000	4040000	4540000	3370000	4460000	4310000	4900000	4300000	5010000	4950000	3750000	4910000
O35643	Ap1b1	1820000	1300000	2100000	1610000	2550000	2050000	2260000	2200000	2040000	1660000	2060000	1610000	1570000	1730000
O35654	Pold2	NA	NA	158289	NA	NA	NA	107402	NA	233675	225481	168582	218771	294101	NA
O35657	Neu1	1090000	2330000	1500000	928209	1460000	1800000	1620000	1990000	4070000	2910000	3210000	4000000	2460000	3930000
O35658	C1qbp	4790000	2930000	4180000	2940000	5460000	4730000	8530000	8470000	11300000	8770000	6150000	6340000	6500000	6690000
O35660	Gstm6	1980000	2200000	3810000	3300000	2520000	2080000	2570000	2270000	1800000	3150000	4630000	3640000	2160000	2460000
O35678	Mgll	1100000	887206	1370000	903498	1580000	1210000	1640000	825794	1050000	1090000	975342	703345	859929	985212
O35680	Mrps12	621031	2780000	453788	5530000	573488	664663	1880000	1520000	1360000	935342	746520	744050	770229	605213
O35683	Ndufa1	475147	NA	337888	191075	216904	233948	330802	393864	452883	620432	445970	505501	532555	803927
O35685	Nudc	1120000	1320000	1150000	1210000	1180000	1130000	985436	1280000	1230000	1090000	1220000	951058	1150000	1140000
O35691	Pnn	785809	570463	479088	412358	950684	760182	1110000	1010000	886232	1200000	995113	987018	996821	899072
O35704	Sptlc1	NA	260784	NA	219110	504591	406036	522054	341612	252473	583886	524539	262746	423705	551093
O35711	Ppfibp2	1240000	1040000	1170000	938867	1110000	1060000	1090000	1060000	1040000	1180000	1260000	1350000	1310000	1220000
O35728	Cyp4a14	9470000	6410000	9890000	8630000	13700000	8750000	8280000	23300000	22300000	16900000	12500000	17300000	20700000	17300000
O35730	Ring1	1530000	662700	732935	810034	914850	1010000	596067	602842	688784	623963	739467	1340000	857140	696943
O35737	Hnrnph1	3800000	2220000	1970000	2810000	2580000	2830000	2720000	3270000	2990000	2730000	2810000	2680000	2920000	3130000
O35738	Klf12	94677.4	NA	NA	NA	158437	79393.2	NA	219840	222166	107178	153102	NA	NA	NA
O35744	Chil3	NA	304479	NA	NA	208774	NA	NA	NA	390059	NA	427043	439054	356719	474953
O35841	Api5	1160000	905034	1010000	810478	1150000	803731	832068	1140000	1160000	1390000	1130000	1310000	1080000	1020000
O35855	Bcat2	NA	NA	NA	NA	NA	NA	NA	NA	NA	NA	NA	NA	NA	NA
O35857	Timm44	2530000	2260000	2840000	2380000	3700000	3290000	3770000	3160000	4270000	4120000	3670000	3770000	3700000	3720000
O35864	Cops5	231369	NA	642857	468792	671668	426191	743113	491958	649283	360483	646965	802851	607287	490041
O35887	Calu	2150000	1680000	1980000	1990000	2760000	2700000	2940000	2830000	2900000	2710000	2500000	1120000	2090000	2100000
O35892	Sp100	540208	NA	340317	483314	327742	540938	381550	371637	500203	328864	NA	491304	735393	717681
O35900	Lsm2	NA	NA	NA	NA	NA	NA	NA	NA	NA	NA	326694	274975	NA	378854
O35930	Gp1ba	531106	733360	221688	644939	334593	313729	223754	987620	364068	576700	540199	932826	604507	571065
O35945	Aldh1a7	20500000	17500000	32800000	20500000	30900000	23700000	31900000	27600000	23400000	33300000	31100000	23800000	22200000	26900000
O35955	Psmb10	766011	920886	901740	766076	540481	832800	700127	NA	548221	611126	739470	614467	620400	1460000
O35963	Rab33b	6520000	4630000	3890000	5090000	3540000	3760000	4690000	4730000	2980000	2240000	2730000	1230000	3220000	2490000
O35969	Gamt	431162	NA	837778	516748	1180000	1050000	1120000	1440000	1190000	1340000	1510000	965804	1470000	1260000
O35972	Mrpl23	926856	1310000	1140000	475367	587924	451708	676747	623626	964328	1680000	1630000	1540000	972096	966335
O35988	Sdc4	1880000	2670000	2390000	3210000	1680000	2470000	1470000	1170000	2060000	2850000	1170000	1600000	2030000	1180000
O54692	Zw10	487552	300937	503097	403958	679564	264452	537966	477936	490501	486813	411415	528352	479378	553872
O54724	Cavin1	720754	1210000	1090000	970134	682181	1450000	1220000	735814	1040000	1020000	1060000	2120000	1130000	1250000
O54734	Ddost	21500000	20800000	14500000	21800000	14500000	17400000	20100000	17400000	16100000	19100000	14000000	16100000	18900000	16300000
O54749	Cyp2j5	4960000	4040000	5400000	5700000	5660000	5410000	4770000	3640000	3540000	3690000	3360000	3500000	4060000	3420000
O54750	Cyp2j6	1380000	1430000	1640000	1580000	1720000	1860000	1300000	2190000	1000000	1530000	1580000	1410000	1620000	1570000
O54754	Aox1	2290000	2320000	2370000	2940000	3370000	2340000	3290000	2350000	2200000	1950000	1630000	1560000	1810000	1940000
O54774	Ap3d1	944809	592664	1180000	1160000	1370000	1290000	1180000	1030000	1200000	1040000	1230000	1110000	1160000	1650000
O54781	Srpk2	819200	1290000	936983	1120000	476593	523773	NA	429308	NA	594649	528415	609448	520227	555037
O54782	Man2b2	1890000	1660000	2240000	2040000	1760000	2000000	1930000	1700000	1840000	1920000	2040000	2860000	2010000	2170000
O54784	Dapk3	1040000	NA	NA	1230000	1200000	NA	NA	NA	1330000	NA	NA	1570000	NA	2160000
O54786	Dffa	583721	331053	551367	359822	664627	523006	583505	625014	525116	745263	575721	492285	477246	662865
O54790	Mafg	NA	NA	15600000	NA	11200000	NA	NA	NA	16300000	NA	NA	NA	NA	NA
O54824	Il16	372626	449878	387869	539912	496525	399506	443813	448748	565143	444318	555792	347122	498606	486477
O54825	Bysl	400973	854200	647836	485532	686963	603313	463436	558486	308986	421137	451090	311794	320558	349226
O54833	Csnk2a2	383322	274252	497881	319985	455808	339363	547947	274790	438797	399625	596760	461350	342931	481499
O54834	Arhgap6	716164	747872	707504	723337	671620	834424	568378	643562	756195	825129	898742	1120000	897178	833949
O54865	Gucy1b1	267726	NA	443714	NA	629143	515806	520335	NA	280782	NA	621844	NA	422692	404750
O54879	Hmgb3	5540000	5240000	3810000	4460000	4030000	5350000	4500000	5080000	4100000	5670000	4530000	5390000	6190000	5610000
O54890	Itgb3	361782	NA	NA	92802.7	402821	133920	622970	189778	399485	268662	401070	161272	186200	344707
O54909	Rdh16	3200000	3580000	3290000	3430000	6370000	3990000	5420000	4270000	3240000	4140000	2300000	2280000	3000000	2840000
O54916	Reps1	1090000	831980	777955	550677	551693	810450	568455	787711	545071	1170000	774743	942163	843963	878201
O54931	Akap2	1040000	986290	759873	894266	842846	1030000	711627	563144	837649	847699	771574	1130000	1070000	883863
O54941	Smarce1	596852	583981	665042	722013	885902	808104	776200	721571	1160000	636433	906643	608919	833215	925721
O54946	Dnajb6	3490000	4040000	4140000	3010000	2380000	4380000	2210000	3220000	2800000	2320000	2370000	3160000	3010000	3880000
O54950	Prkag1	NA	NA	NA	NA	NA	NA	NA	154229	NA	NA	NA	NA	NA	116533
O54962	Banf1	231373	23995.9	84553.4	199236	252041	141468	297999	282331	458385	315189	338475	318332	294707	322194
O54967	Tnk2	577957	799568	243349	369791	274548	317566	113194	251622	137692	208628	244760	289172	140702	137842
O54983	Crym	NA	NA	NA	NA	NA	NA	NA	117359	NA	NA	NA	NA	349394	NA
O54984	Get3	1720000	1460000	1930000	1780000	1620000	1860000	2230000	1660000	1790000	2400000	2740000	1720000	1800000	1520000
O54988	Slk	1240000	1350000	1060000	1270000	1110000	1490000	1180000	1120000	1070000	1120000	1140000	1170000	1200000	1100000
O55022	Pgrmc1	37300000	41900000	40400000	44500000	40100000	47200000	34500000	36400000	31400000	36600000	30500000	27500000	34100000	32200000
O55023	Impa1	3260000	3480000	4060000	4550000	4130000	3500000	3860000	3240000	2960000	3470000	2970000	2650000	3170000	4130000
O55028	Bckdk	219659	NA	509853	253144	247111	217479	274862	198624	249277	331029	440100	318510	145447	368463
O55029	Copb2	3460000	3250000	2470000	3070000	3120000	3560000	3050000	3350000	2660000	2300000	2180000	2240000	2680000	2690000
O55042	Snca	3870000	1600000	4290000	4820000	6610000	4350000	6490000	15800000	7200000	9240000	12200000	13800000	8970000	9040000
O55060	Tpmt	3200000	3650000	4410000	3950000	5160000	3840000	4150000	3950000	2800000	3330000	3550000	2810000	3100000	2340000
O55071	Cyp2b19	NA	NA	NA	NA	NA	NA	NA	NA	NA	NA	NA	NA	NA	NA
O55091	Impact	231790	315779	371925	298057	305436	362116	240452	171721	140023	404723	189005	174268	124520	189493
O55106	Strn	1140000	1220000	1030000	1180000	1170000	1240000	1220000	1040000	1170000	964253	965448	1060000	913399	903648
O55111	Dsg2	2500000	2780000	2530000	2910000	2990000	3230000	3240000	3230000	2870000	3000000	2600000	2790000	3500000	2870000
O55125	Nipsnap1	10000000	13200000	18500000	11000000	9320000	8320000	11400000	11600000	13400000	14400000	14500000	15000000	10800000	12400000
O55126	Nipsnap2	609554	458509	423519	412628	NA	457885	296137	345109	318934	443292	512701	927230	355811	648168
O55127	Cyp26a1	326518	401958	325590	426443	NA	152458	NA	173961	NA	NA	NA	NA	241503	130648
O55128	Sap18	592494	1570000	NA	396978	NA	2360000	2070000	NA	NA	NA	NA	1530000	452633	NA
O55131	Septin7	1660000	1420000	1600000	1440000	1730000	2000000	1960000	1150000	1540000	2340000	1350000	2050000	1840000	1710000
O55134	Pcdh12	NA	NA	204160	NA	99711.2	123884	NA	189034	NA	86466.4	214310	95625.1	123274	107419
O55135	Eif6	1350000	1010000	1240000	1520000	1250000	1270000	1040000	1240000	1230000	918531	1160000	824414	1440000	1320000
O55137	Acot1	2430000	1470000	3630000	1790000	4000000	3270000	4160000	3900000	5090000	6240000	3660000	4580000	3470000	3720000
O55142	Rpl35a	48200000	55700000	36300000	53400000	26000000	47200000	31300000	30200000	28100000	37100000	35000000	41800000	52500000	44200000
O55143	Atp2a2	4690000	4640000	4480000	4990000	5590000	5320000	4890000	3800000	3740000	3370000	3010000	3090000	3820000	3530000
O55176	Pja1	1190000	944153	1190000	1140000	813538	1020000	963852	595351	626673	968192	1110000	1190000	1130000	1100000
O55187	Cbx4	349017	305612	199187	216120	278292	527805	NA	NA	138981	204396	NA	425436	450083	369102
O55201	Supt5h	1520000	1040000	1470000	1670000	1410000	1520000	1660000	1020000	1200000	1260000	1060000	1470000	1500000	1320000
O55222	Ilk	1890000	5500000	2960000	1280000	3790000	2100000	2980000	3230000	2650000	4810000	3850000	3480000	2910000	2540000
O55229	Chkb	2820000	1910000	2010000	2410000	3430000	1240000	2450000	1710000	1940000	1630000	1790000	1990000	2280000	1640000
O55234	Psmb5	2240000	1720000	3480000	1880000	2970000	1960000	3140000	2300000	2450000	2720000	3320000	2390000	3380000	1720000
O55239	Nnmt	120677	213346	209168	225645	199186	183943	212706	NA	NA	79263.9	64338	58431	NA	NA
O70131	Ninj1	NA	NA	NA	NA	NA	NA	NA	NA	NA	NA	NA	NA	NA	NA
O70133	Dhx9	2460000	2630000	2400000	2290000	2950000	2690000	2600000	2310000	2480000	2470000	2120000	2160000	2660000	2650000
O70145	Ncf2	215127	149532	142675	123771	245008	133938	115319	164154	230566	241245	117836	165908	150556	208527
O70152	Dpm1	458158	205344	381335	456121	389149	705842	367106	278125	499354	498896	465513	421602	399228	358600
O70161	Pip5k1c	465674	NA	1580000	444720	467036	870952	580462	1090000	559719	NA	NA	752245	731930	630204
O70165	Fcn1	NA	NA	NA	NA	NA	NA	NA	NA	NA	NA	NA	NA	NA	NA
O70172	Pip4k2a	887636	484167	677552	588041	764039	919023	823987	743526	554345	959636	715697	957301	968587	1140000
O70194	Eif3d	3130000	3210000	3310000	3110000	2900000	2950000	3150000	2780000	2740000	2270000	2350000	2100000	2860000	2960000
O70200	Aif1	NA	NA	73623.4	NA	NA	NA	NA	NA	NA	134944	NA	NA	NA	203341
O70209	Pdlim3	131006	236873	NA	305134	89711	389404	NA	NA	156647	231941	132808	300822	190569	229697
O70250	Pgam2	NA	NA	NA	NA	NA	NA	NA	NA	NA	NA	NA	121207	NA	NA
O70251	Eef1b	8080000	11900000	8610000	8910000	9920000	6990000	8740000	11100000	7370000	7290000	11300000	6510000	5550000	6090000
O70252	Hmox2	1150000	1390000	1670000	1040000	1280000	993051	1140000	1240000	1150000	914751	1370000	1430000	1250000	1380000
O70281	Tpst1	429395	205201	246115	242980	413038	487032	344531	256913	315956	377786	334280	352752	477385	339426
O70293	Grk6	503792	366404	323027	302300	495188	445228	445174	664429	493414	488993	NA	NA	293277	NA
O70303	Cideb	265324	NA	NA	294848	NA	NA	NA	NA	NA	NA	NA	NA	203162	NA
O70305	Atxn2	3410000	6510000	3430000	3450000	3610000	2830000	1910000	3040000	2290000	3120000	2450000	2220000	2080000	1780000
O70309	Itgb5	346963	354557	161667	158689	279342	256603	71582	137406	184951	78663.3	NA	NA	136319	NA
O70310	Nmt1	6910000	9510000	7560000	9670000	8480000	8120000	10200000	7760000	6460000	7560000	5960000	9370000	6850000	8820000
O70311	Nmt2	1200000	897633	751051	757175	843972	708816	749355	1110000	605065	960811	926112	755897	620805	660306
O70318	Epb41l2	2520000	2690000	2420000	2610000	2640000	2400000	2450000	2000000	2490000	2640000	2320000	2380000	2860000	2930000
O70325	Gpx4	6670000	6330000	10300000	6710000	8180000	6150000	6710000	8470000	7050000	8070000	9560000	6350000	8030000	9020000
O70338	Rnaseh1	NA	228573	NA	279924	186794	241411	261820	NA	268197	249833	261424	287654	267359	NA
O70348	Dxo	1050000	673860	981272	683098	971468	1180000	792276	1100000	1240000	791213	661135	1320000	1310000	1200000
O70362	Gpld1	2470000	2410000	2300000	2310000	2270000	2340000	2840000	4010000	3070000	3410000	2860000	3020000	3170000	3850000
O70370	Ctss	1670000	2490000	1290000	2200000	1640000	2150000	1790000	1580000	1600000	1420000	887353	1280000	963307	2150000
O70378	Emc8	612771	NA	345377	387883	655193	341678	799466	546479	530828	639077	822537	667130	623946	688468
O70400	Pdlim1	7420000	5450000	5840000	4320000	6250000	4410000	4150000	7010000	7210000	8550000	7690000	7740000	6540000	6790000
O70404	Vamp8	NA	NA	NA	NA	NA	54336.5	227893	34748.8	136509	88327.9	49718.6	191857	NA	250570
O70423	Aoc3	NA	248694	155046	107898	168425	636297	NA	NA	68535	271715	NA	NA	208712	133420
O70435	Psma3	2460000	2950000	3570000	2600000	4870000	2900000	3930000	3750000	3000000	3960000	4460000	2250000	2480000	2970000
O70439	Stx7	3120000	2410000	1900000	2170000	2420000	2360000	1890000	2320000	2140000	1520000	1200000	2380000	2390000	2840000
O70475	Ugdh	15500000	12500000	19800000	15300000	22200000	15800000	25800000	18700000	22100000	20400000	21200000	17200000	16500000	27400000
O70492	Snx3	3080000	3670000	3600000	2340000	1630000	2320000	2330000	2880000	2400000	2730000	3660000	3760000	2660000	2650000
O70493	Snx12	1660000	2020000	2480000	2010000	1590000	1360000	1650000	1690000	1950000	2370000	2580000	1720000	1500000	1660000
O70496	Clcn7	679071	637726	273618	447473	331156	190798	375340	410565	373983	330550	345500	266778	372305	293806
O70503	Hsd17b12	2280000	2410000	2770000	2820000	2650000	2280000	2400000	2040000	1720000	2010000	1800000	1390000	1790000	1860000
O70566	Diaph2	404135	487961	522810	717393	407240	526870	286338	365579	445873	522794	480867	380516	596993	364267
O70570	Pigr	10200000	10000000	7630000	7530000	10600000	11200000	9860000	7090000	7360000	5940000	5320000	5580000	4230000	8070000
O70572	Smpd2	494544	400296	459568	602951	771576	708195	638227	314185	415843	544808	505654	405127	478248	621987
O70579	Slc25a17	NA	472982	NA	NA	303511	NA	50911.1	NA	NA	NA	NA	NA	NA	NA
O70585	Dtnb	456765	259865	342069	369463	205103	282639	272644	345940	360774	193562	285032	377707	223159	337096
O70589	Cask	847887	818225	933887	961402	1530000	1100000	1250000	938199	1120000	1080000	1070000	938792	1130000	886017
O70591	Pfdn2	611462	585388	1500000	864230	560070	599028	548914	686177	784708	865323	1060000	763401	578307	838540
O88207	Col5a1	NA	525532	104229	216647	1160000	404540	1490000	NA	848338	977052	361892	723413	747733	350256
O88271	Cfdp1	2950000	3460000	3370000	2530000	2380000	2100000	1110000	2530000	1680000	1990000	1750000	2220000	1920000	1880000
O88286	Wiz	170449	56577.8	181309	110633	158922	92991.8	NA	124217	299202	160949	262120	156589	139261	NA
O88291	Znf326	1440000	1340000	1260000	1290000	1180000	1200000	1130000	1140000	1330000	1040000	1030000	1260000	1150000	1190000
O88322	Nid2	1190000	1130000	902571	1090000	1210000	1360000	1130000	961558	1210000	1210000	1050000	992610	1240000	1380000
O88325	Naglu	1100000	1330000	940332	1040000	1020000	1320000	1180000	1280000	973824	1070000	1090000	880822	980917	937716
O88342	Wdr1	15500000	13800000	14400000	16700000	20300000	19200000	18600000	19100000	19500000	17700000	14800000	15700000	18100000	19300000
O88343	Slc4a4	258154	303121	258707	370174	213015	236451	306147	78986.3	374444	188247	356657	291430	293588	312540
O88351	Ikbkb	778987	712394	738796	658838	868869	978053	785870	804144	723976	714835	735559	605679	715292	792496
O88384	Vti1b	1580000	1440000	2130000	1890000	1850000	1850000	2400000	1500000	1820000	1420000	2530000	1930000	1310000	2440000
O88428	Papss2	9540000	7520000	9110000	7340000	13700000	9430000	11400000	9470000	8890000	8860000	7990000	6290000	7280000	8090000
O88441	Mtx2	NA	NA	NA	NA	NA	NA	562542	NA	510440	NA	NA	NA	NA	NA
O88447	Klc1	258214	325448	324971	175799	407201	339229	397531	448663	401803	407325	447712	374648	416512	360775
O88448	Klc2	297393	151088	427059	204563	468548	298009	359436	282762	368426	405292	400135	361289	293795	301594
O88451	Rdh7	18100000	21300000	18900000	19800000	25800000	21300000	22400000	18000000	19200000	18600000	14000000	11300000	19500000	12100000
O88455	Dhcr7	NA	NA	NA	NA	249413	NA	213901	NA	NA	NA	NA	NA	NA	NA
O88456	Capns1	339362	401911	327731	356052	NA	241619	156567	307972	138776	183243	279273	NA	41233	NA
O88487	Dync1i2	2520000	1850000	1590000	2300000	3160000	2390000	2370000	2060000	1840000	2320000	1370000	1480000	2470000	2210000
O88520	Shoc2	720090	191268	521860	241613	698633	378503	378945	653937	701682	585204	771818	504985	554237	327117
O88522	Ikbkg	897545	751092	1400000	997873	1000000	1120000	752776	978019	900202	1100000	1300000	1290000	937882	925076
O88531	Ppt1	6770000	5260000	5090000	6180000	3860000	4990000	4830000	5370000	6230000	6300000	5370000	5640000	5340000	5320000
O88532	Zfr	1070000	1000000	1150000	981447	1230000	1210000	1400000	1040000	1160000	1170000	864254	1120000	908192	1180000
O88533	Ddc	1160000	1240000	1230000	1340000	1050000	1000000	1230000	1040000	885977	1170000	895948	1020000	988021	892250
O88543	Cops3	1400000	915879	862687	1080000	1370000	1330000	1450000	1490000	1300000	1280000	1430000	1340000	1100000	1330000
O88544	Cops4	153992	NA	291887	218774	233035	195547	169651	270500	200339	279903	322492	236692	288940	278149
O88545	Cops6	NA	NA	NA	NA	NA	479394	698079	513592	NA	459631	719922	536138	NA	NA
O88554	Parp2	NA	NA	NA	NA	NA	NA	NA	NA	NA	NA	NA	NA	NA	NA
O88569	Hnrnpa2b1	25900000	31500000	25800000	25400000	23500000	27600000	23600000	31900000	31000000	29100000	32700000	26400000	35000000	30800000
O88587	Comt	3830000	2040000	2540000	2750000	3930000	3610000	4200000	3310000	2990000	2850000	2670000	2750000	2620000	2230000
O88623	Usp2	66820.3	NA	NA	NA	200090	99390.1	147175	125302	235795	144209	212604	142925	NA	210047
O88630	Gosr1	749208	399547	470266	625891	406280	499768	175210	425203	271530	532197	281302	368164	376986	445085
O88643	Pak1	155011	116254	174837	186810	243285	144973	81175.4	96977	NA	238766	154536	220638	NA	151146
O88653	Lamtor3	NA	NA	NA	NA	NA	NA	NA	40457.7	33977.8	38760.2	NA	NA	38434.9	26768.5
O88668	Creg1	10600000	14300000	7050000	8130000	5170000	6780000	8290000	7130000	11300000	9810000	9030000	9790000	11800000	10000000
O88685	Psmc3	6550000	7530000	8060000	6660000	9040000	7040000	9890000	7950000	7390000	8090000	7860000	6580000	5790000	8250000
O88696	Clpp	1460000	761668	1890000	1340000	1740000	1130000	2890000	2400000	2400000	3840000	5860000	3030000	3000000	3230000
O88697	Stk16	NA	122473	211447	NA	289006	229620	298583	NA	222686	224335	189672	179973	36433.8	NA
O88712	Ctbp1	NA	47133.3	361853	243720	293926	202388	377144	302083	313207	644203	489803	468979	286506	426323
O88735	Map7	1730000	1930000	1140000	956374	1140000	822226	498768	1190000	908514	843472	1030000	872708	755298	766295
O88736	Hsd17b7	1180000	935426	985042	887092	1380000	950577	1170000	725689	989551	978020	539910	533630	659406	504194
O88738	Birc6	835146	793189	845645	877423	1260000	900910	1110000	895770	984466	747806	751322	676139	827261	888574
O88746	Tom1	910716	755035	1310000	1100000	1040000	840729	553170	814693	718626	1060000	1050000	437587	424008	620050
O88783	F5	1830000	1930000	1660000	1670000	1490000	2160000	1570000	2160000	1880000	2080000	1510000	2070000	1800000	2220000
O88792	F11r	NA	NA	NA	431164	360316	302713	277689	NA	NA	NA	390491	542805	502721	260587
O88796	Rpp30	NA	NA	NA	NA	NA	NA	20303.5	NA	75885.4	NA	NA	NA	NA	153904
O88803	Lect2	1340000	2650000	1110000	1440000	898285	1610000	970493	937305	664195	620172	797461	1540000	2010000	1360000
O88811	Stam2	283626	272853	297206	508644	625804	390727	459834	561480	396572	258655	389835	494377	382983	567706
O88822	Sc5d	NA	53596.7	NA	NA	NA	NA	NA	NA	NA	NA	NA	NA	NA	NA
O88829	St3gal5	NA	NA	NA	NA	64590.8	NA	44186.1	NA	42476.7	NA	NA	NA	NA	NA
O88833	Cyp4a10	1190000	2090000	2530000	1760000	2660000	2170000	2060000	1550000	2420000	1910000	1700000	2270000	2490000	2040000
O88844	Idh1	136000000	123000000	150000000	146000000	230000000	158000000	233000000	183000000	178000000	174000000	177000000	152000000	163000000	157000000
O88851	Rbbp9	2340000	1870000	2030000	2560000	2080000	2270000	2430000	2270000	2020000	2280000	3020000	3420000	3220000	2150000
O88856	Tpst2	453010	643228	563717	371502	636130	772041	775810	605134	533920	517451	379217	717843	585796	841533
O88874	Ccnk	804593	632998	966495	549573	875113	753919	735680	605996	820058	752407	892214	710530	1150000	405567
O88876	Dhrs3	365009	256874	404608	335006	277125	386766	578901	436132	353159	269857	401099	428027	460633	395141
O88879	Apaf1	NA	NA	NA	NA	NA	NA	NA	NA	NA	NA	NA	NA	NA	NA
O88908	Soat2	1370000	1830000	1350000	2130000	1990000	1480000	1580000	1950000	1990000	2610000	1690000	2030000	3530000	1700000
O88942	Nfatc1	492456	493921	439851	429549	444323	567517	644492	356025	605174	457340	500356	542369	451121	500501
O88947	F10	890174	1040000	805321	995891	1050000	967340	862477	1000000	882586	909533	1110000	876016	947806	975620
O88952	Lin7c	1560000	1830000	2490000	2170000	1460000	1540000	918472	1660000	1740000	1770000	2400000	2480000	1130000	1740000
O88958	Gnpda1	711031	647659	925743	974071	439604	377591	770891	680282	475552	522726	696946	912430	929358	818193
O88962	Cyp8b1	3680000	5620000	4850000	4270000	5100000	4560000	3860000	2720000	3380000	3700000	3010000	2190000	2530000	2250000
O88967	Yme1l1	1650000	1730000	1840000	1850000	1800000	1680000	1880000	1400000	1710000	1340000	1830000	1590000	1500000	1770000
O88983	Stx8	600447	445561	545868	565359	646103	694907	346769	479938	492533	400666	511808	549380	680761	742253
O88986	Gcat	9420000	7210000	11300000	7590000	11700000	8860000	13900000	15500000	21100000	16800000	18200000	13900000	14900000	16600000
O88990	Actn3	NA	NA	NA	NA	NA	NA	NA	NA	154173	92301.5	NA	NA	NA	NA
O89017	Lgmn	9730000	2110000	2740000	4000000	5550000	2300000	5550000	NA	4240000	2160000	1750000	5570000	12200000	9630000
O89020	Afm	2990000	2160000	2560000	3060000	2830000	3110000	2670000	5460000	3740000	4500000	4260000	4860000	3820000	5310000
O89023	Tpp1	5080000	939666	5350000	4850000	4790000	4220000	5440000	5290000	6750000	7390000	6530000	6010000	6950000	6220000
O89026	Robo1	107350	191585	91209.3	116090	182447	NA	157782	NA	185311	NA	148432	135833	127849	66002.8
O89032	Sh3pxd2a	309658	278242	305726	510520	310848	323457	261778	281823	221602	309636	248986	288386	286088	387001
O89050	Mkln1	NA	NA	NA	NA	NA	NA	166100	NA	110014	NA	NA	NA	NA	NA
O89051	Itm2b	352541	255741	330929	260977	532355	422868	416135	NA	293756	NA	258487	286213	320975	281987
O89053	Coro1a	2160000	1660000	1620000	1890000	1990000	2730000	2000000	1880000	1750000	1760000	1570000	1970000	2550000	4670000
O89079	Cope	481862	253810	608543	313911	498574	459117	767819	968139	690444	1110000	1210000	837858	781134	759270
O89086	Rbm3	977701	1170000	462398	1140000	592507	605172	1020000	1750000	972290	1350000	931673	1320000	1670000	1650000
O89090	Sp1	1970000	1390000	1800000	1640000	2600000	1160000	2700000	2000000	1510000	1760000	1700000	1770000	1600000	1090000
O89106	Fhit	203373	193427	268329	389067	219558	303619	401634	433882	380573	447165	408650	279091	444666	346563
O89110	Casp8	2200000	1880000	1980000	2450000	1920000	2490000	2170000	2920000	1830000	2230000	1900000	1890000	1780000	2120000
O89112	Lancl1	1030000	781211	951760	732082	744797	935115	815884	NA	1050000	964939	662098	NA	811550	1140000
P00186	Cyp1a2	19400000	13300000	15000000	17200000	15800000	17900000	19000000	15500000	14800000	14700000	14700000	11000000	14000000	14300000
P00329	Adh1	186000000	209000000	163000000	305000000	251000000	228000000	237000000	159000000	225000000	160000000	145000000	149000000	143000000	200000000
P00375	Dhfr	5550000	4810000	5300000	4560000	4920000	4130000	5160000	5850000	5330000	5570000	6250000	4290000	5120000	5510000
P00405	Mtco2	23200000	23800000	24600000	24600000	20200000	36700000	20900000	32100000	21200000	19100000	28300000	27200000	33200000	21000000
P00493	Hprt1	2180000	1830000	3590000	2410000	2620000	2110000	3210000	3270000	2120000	2250000	2450000	2770000	2660000	3250000
P00520	Abl1	558350	373580	491584	598811	333481	446480	262287	416895	348318	230645	254980	460319	335589	370000
P00683	Rnase1	NA	NA	NA	NA	NA	NA	NA	NA	NA	NA	NA	NA	NA	NA
P00687	Amy1	173934	811640	979084	579491	1000000	969281	1080000	665310	1050000	958096	948014	739349	710785	671707
P00688	Amy2a5	NA	NA	NA	NA	244287	NA	NA	NA	NA	NA	NA	NA	NA	NA
P00920	Ca2	5580000	4050000	8020000	7260000	6670000	7240000	5460000	15600000	6490000	7630000	12000000	10200000	6870000	9970000
P01027	C3	7890000	8480000	7580000	9380000	9000000	9630000	9070000	10100000	8390000	9460000	8990000	9350000	9320000	11700000
P01029	C4b	2680000	2640000	2310000	2950000	3090000	2780000	3010000	2390000	2390000	2770000	2530000	2010000	2470000	2700000
P01592	Jchain	2280000	2610000	1880000	2310000	1590000	2100000	1940000	1010000	1860000	2450000	1740000	1980000	2310000	1870000
P01631	NA	1310000	NA	NA	NA	520171	NA	662988	582770	620689	383037	588102	441719	383338	723970
P01635	Igkv12-41	591017	828591	532460	842467	261871	587910	459273	2300000	678222	396275	279778	2160000	809230	954215
P01639	Igkv9-120	165190	259725	378606	161318	216578	135358	389773	609489	423528	269887	402842	316588	506703	262621
P01642	Gm10881	366902	115067	170205	NA	163688	134276	133345	398263	137436	163045	147702	255094	328043	674276
P01643;P01644;P01645;P01646;P01647;P01648;P01649	NA	674459	667310	NA	391585	NA	507887	436138	NA	302414	NA	NA	850090	NA	NA
P01654;P01656	NA	NA	NA	NA	232463	271306	NA	NA	923626	710274	NA	NA	NA	NA	143925
P01667	NA	NA	NA	NA	NA	NA	NA	NA	NA	NA	NA	NA	NA	NA	NA
P01831	Thy1	678939	804341	390154	910528	520823	658463	NA	NA	532365	741310	NA	547560	492921	NA
P01837	Igkc	3200000	1270000	1790000	2230000	1460000	1650000	2450000	3560000	3450000	2780000	1980000	1860000	3970000	3400000
P01844	Iglc2	561927	294397	420853	422387	329144	471840	249573	1020000	479395	500988	721843	675948	557612	790683
P01867	Ighg2b	29500000	21900000	31100000	24200000	16900000	16200000	20400000	87300000	24000000	19500000	22700000	17900000	19900000	30200000
P01869	Ighg1	4040000	5200000	4390000	5680000	4490000	4540000	3750000	6020000	9330000	5610000	6150000	4110000	3740000	5210000
P01872	Ighm	10000000	8570000	9060000	11100000	8560000	6870000	11300000	19800000	8940000	8630000	5020000	7440000	8020000	15600000
P01897	H2-L	2070000	1530000	1990000	2420000	2790000	2540000	2860000	1640000	2330000	2000000	1380000	1600000	1640000	3640000
P01898	H2-Q10	3040000	4070000	2220000	4820000	3580000	4510000	3660000	3670000	3430000	4450000	5450000	2960000	4710000	4440000
P01901	H2-K1	6680000	3950000	5000000	7250000	6420000	5970000	6800000	5490000	6410000	5190000	4620000	3450000	4280000	6810000
P01904	H2-Ea	NA	649977	NA	828770	NA	NA	NA	NA	NA	NA	NA	NA	NA	NA
P01921	H2-Ab1	97637.4	NA	NA	436817	374318	269845	404698	NA	300650	223443	NA	NA	139606	635161
P01942	Hba	369000000	334000000	298000000	335000000	294000000	256000000	249000000	923000000	399000000	550000000	699000000	1150000000	455000000	950000000
P02089	Hbb-b2	NA	NA	423209	NA	NA	430170	NA	1250000	261226	NA	NA	943862	407992	1100000
P02104	Hbb-y	747876	832165	759071	732358	634964	776266	697687	1180000	880781	938396	1310000	1590000	1180000	1470000
P02301;P68433;P84228;P84244	H3-3b;H3-5;H3c11;H3c15	29800000	22800000	29400000	40600000	24300000	16200000	26600000	22000000	23800000	28300000	43400000	49100000	26800000	26900000
P02463	Col4a1	574110	NA	552425	NA	1060000	598339	880996	945944	1320000	1120000	809934	647526	822222	1210000
P02468	Lamc1	2100000	2760000	2240000	2690000	2980000	3200000	2340000	2410000	2620000	2920000	2800000	2970000	4310000	4030000
P02469	Lamb1	NA	NA	NA	NA	NA	NA	NA	NA	NA	NA	NA	NA	NA	NA
P02535	Krt10	258384	NA	NA	576684	NA	513947	NA	NA	NA	NA	NA	2010000	794809	NA
P03888	Mtnd1	NA	NA	NA	NA	NA	NA	NA	NA	NA	NA	NA	NA	NA	121014
P03911	Mtnd4	153232	157133	60194.4	140077	NA	244987	182747	135975	178891	165053	109601	NA	79342.6	76342.5
P03921	Mtnd5	NA	NA	NA	NA	NA	NA	NA	NA	NA	NA	NA	NA	NA	NA
P03930	Mtatp8	57700000	22300000	30300000	35300000	28600000	47900000	31800000	16400000	33900000	24600000	27200000	42500000	52500000	28700000
P03953	Cfd	391154	628755	140894	369154	473487	430908	751072	1070000	669106	705193	690102	594174	463551	1050000
P03958	Ada	887382	1250000	1210000	981078	1020000	968347	1150000	1460000	1210000	1440000	1710000	1020000	1250000	1440000
P03995	Gfap	NA	NA	NA	NA	NA	NA	NA	NA	NA	433562	NA	NA	NA	493400
P04104	Krt1	741700	1020000	1170000	367139	374765	429668	378462	302364	267024	582261	318453	337564	404291	459477
P04117	Fabp4	1680000	2090000	1820000	1810000	1850000	2230000	2140000	2620000	1830000	2210000	2410000	2400000	2780000	2380000
P04186	Cfb	3720000	4110000	3160000	3890000	3240000	3900000	3220000	3830000	3530000	3310000	3050000	4860000	4390000	4880000
P04202	Tgfb1	331423	344741	133217	568111	155508	207852	234209	566100	239194	274440	474348	437460	236734	576638
P04247	Mb	NA	NA	NA	NA	NA	NA	NA	NA	NA	NA	NA	NA	NA	NA
P04441	Cd74	1680000	2230000	1070000	3130000	1160000	1810000	1160000	1260000	786914	1160000	1150000	1040000	519555	3630000
P04443	Hbb-bh0	5590000	3310000	3690000	4270000	NA	NA	3170000	7720000	NA	5990000	6970000	15800000	6400000	9820000
P04627	Araf	3260000	1270000	2040000	1590000	1970000	1900000	1420000	3480000	2330000	1680000	2040000	2430000	1760000	1990000
P04919	Slc4a1	7570000	5360000	7230000	9270000	11800000	10800000	7550000	25300000	7820000	11900000	15600000	14500000	10900000	17000000
P04939	Mup3	26700000	49800000	33500000	47700000	49900000	41100000	53900000	39800000	47800000	42400000	44100000	36200000	27100000	38900000
P04945	NA	NA	854322	550151	830908	256802	775710	1710000	2380000	1220000	425249	257015	717955	1180000	1220000
P05017	Igf1	1810000	2750000	1740000	1720000	1100000	1590000	1120000	1440000	1290000	1310000	959056	1310000	1390000	1500000
P05063	Aldoc	514597	1020000	699367	739374	1270000	532087	1220000	587127	1180000	1480000	993131	898529	1100000	914447
P05064	Aldoa	8650000	7980000	9600000	6960000	5860000	8110000	9020000	6840000	8400000	9020000	8060000	11900000	9890000	8700000
P05132	Prkaca	787130	924362	1050000	1070000	730680	974612	913403	817133	734403	839364	686642	783877	1250000	937311
P05201	Got1	42900000	42200000	49300000	60600000	71400000	54500000	76800000	35400000	54300000	57300000	45100000	62300000	59400000	67200000
P05202	Got2	170000000	125000000	158000000	147000000	159000000	177000000	231000000	144000000	199000000	185000000	178000000	218000000	178000000	200000000
P05208	Cela2a	622421	NA	NA	NA	370504	284835	NA	NA	NA	NA	NA	NA	NA	NA
P05555	Itgam	NA	NA	NA	NA	NA	NA	NA	85997.4	NA	NA	NA	NA	NA	64721.8
P05622	Pdgfrb	NA	NA	NA	NA	176134	NA	NA	NA	NA	NA	NA	NA	195477	304480
P05784	Krt18	19000000	19700000	29900000	23400000	36500000	33200000	42500000	33000000	31900000	40100000	29300000	31200000	29500000	38500000
P05977	Myl1	NA	NA	NA	NA	NA	NA	NA	NA	NA	NA	NA	NA	NA	NA
P06151	Ldha	30400000	21700000	36400000	25700000	39700000	29900000	40500000	36600000	26200000	45100000	37100000	34200000	32400000	38600000
P06330	NA	NA	91524.7	123009	140367	68020.3	92261.6	NA	NA	134081	NA	67311.4	235261	212409	209270
P06339	H2-T23	393689	304093	261506	559702	418141	360683	430547	NA	240902	302998	NA	NA	NA	388328
P06344	NA	NA	NA	NA	259782	235095	NA	266129	NA	233074	645735	410004	166691	NA	454887
P06537	Nr3c1	531514	1100000	591515	520297	1030000	518371	366877	521238	451005	322416	535462	312182	478085	343454
P06683	C9	2970000	3280000	1880000	2280000	1490000	2610000	1950000	2060000	1320000	1410000	998235	1230000	986940	1790000
P06684	C5	633466	1150000	550801	926675	696033	795934	794531	908546	764973	888995	760487	892407	700681	875384
P06728	Apoa4	4530000	4330000	7700000	5040000	4890000	3750000	3820000	4840000	4770000	7090000	10200000	8690000	3810000	7210000
P06745	Gpi	4250000	3310000	4950000	4140000	6440000	4970000	6150000	5730000	7050000	5260000	4460000	5100000	5170000	6030000
P06797	Ctsl	1010000	1400000	760919	1080000	791607	781651	663073	681542	710255	816750	768073	1170000	866447	1000000
P06800	Ptprc	340059	629280	463052	232970	472609	515261	463898	324537	320081	686293	382653	332032	272652	738144
P06801	Me1	22400000	16200000	38500000	19500000	38700000	20400000	28700000	22500000	17900000	25600000	23700000	17100000	18900000	16400000
P06802	Enpp1	618047	708312	405051	513491	819553	564987	712775	581760	868211	815026	714893	517573	499392	629818
P06909	Cfh	5000000	3750000	3180000	3260000	2420000	3980000	2540000	3060000	2310000	2070000	1200000	1910000	1600000	2060000
P07146	Prss2	NA	NA	NA	NA	NA	NA	NA	NA	NA	NA	NA	NA	NA	NA
P07214	Sparc	NA	NA	NA	172321	342296	348685	240088	207259	232526	304136	228248	226354	243467	369283
P07309	Ttr	2120000	5120000	1970000	2180000	1740000	2090000	2230000	1440000	1570000	3010000	3140000	4580000	2620000	3830000
P07310	Ckm	NA	869255	986732	2130000	1360000	776527	979583	206136	1040000	985980	597338	1310000	1250000	845305
P07356	Anxa2	1800000	1660000	1850000	2160000	5100000	3050000	4050000	2780000	3260000	4080000	2960000	3240000	3400000	4160000
P07724	Alb	486000000	299000000	422000000	379000000	334000000	384000000	421000000	709000000	574000000	614000000	457000000	594000000	399000000	666000000
P07742	Rrm1	396331	228008	245833	450411	284750	477177	711216	517514	244461	462726	308681	602628	520779	533834
P07759	Serpina3k	19400000	22200000	17200000	16500000	16000000	16800000	20600000	25700000	21400000	24600000	23100000	22300000	20500000	24700000
P07901	Hsp90aa1	16100000	17800000	15100000	17700000	18500000	19600000	18900000	15500000	17900000	17400000	14300000	10900000	16400000	15700000
P08003	Pdia4	22200000	20500000	18700000	21100000	20700000	21200000	21700000	19500000	21800000	18400000	17800000	14400000	14600000	15400000
P08030	Aprt	1620000	1330000	2350000	1830000	1070000	1320000	1390000	2340000	2550000	2290000	3410000	1240000	2590000	2440000
P08032	Spta1	3380000	2480000	2830000	3640000	4370000	3290000	3340000	8580000	3820000	3640000	6250000	6270000	3960000	6740000
P08071	Ltf	660773	648893	445912	479220	529995	580338	464743	233515	431170	393963	431446	560034	545751	632143
P08101	Fcgr2	3450000	4010000	3280000	3900000	3700000	3250000	4300000	3360000	5590000	3180000	3160000	2050000	3440000	4060000
P08103	Hck	246326	211564	NA	435278	462072	384897	NA	NA	348042	NA	NA	NA	NA	555596
P08113	Hsp90b1	58300000	52000000	52300000	63100000	53300000	72500000	67800000	53400000	51500000	53700000	47900000	52700000	57900000	67800000
P08122	Col4a2	4800000	7380000	5190000	6370000	4130000	5690000	3240000	3120000	3530000	3980000	3260000	3800000	4650000	4260000
P08207	S100a10	NA	431572	NA	546405	152079	118303	NA	95053.7	NA	312501	NA	288041	213579	148635
P08226	Apoe	13800000	14900000	20000000	19600000	16800000	14200000	15800000	11000000	14700000	17000000	18600000	17200000	11300000	19100000
P08228	Sod1	355000000	650000000	312000000	451000000	328000000	495000000	430000000	294000000	302000000	309000000	441000000	441000000	494000000	291000000
P08249	Mdh2	84100000	70900000	88600000	76900000	55600000	65800000	73700000	77800000	80400000	93500000	94000000	109000000	93600000	83300000
P08553	Nefm	NA	NA	NA	NA	NA	NA	NA	NA	NA	NA	NA	NA	NA	NA
P08607	C4bpa	1870000	1090000	1120000	946745	1110000	1410000	1290000	739855	554548	619663	294055	369780	405431	559711
P08680	Alas2	97878.3	NA	279871	NA	284955	127889	415294	316905	339854	414795	255847	166649	215711	218862
P08752	Gnai2	1020000	883730	1790000	993941	1900000	1410000	1150000	1070000	1230000	1220000	1320000	1470000	1210000	1440000
P08775	Polr2a	1260000	1070000	970159	1240000	960864	1010000	990483	969120	1180000	955541	946123	1020000	1160000	954074
P08905	Lyz2	1000000	1330000	447850	1310000	365982	810886	517351	690621	619414	886370	521674	928350	359717	670319
P09041	Pgk2	NA	NA	191475	NA	223640	NA	220583	216214	246737	209817	310510	NA	284921	210956
P09055	Itgb1	9310000	7910000	7270000	6980000	6990000	8840000	7130000	8480000	6500000	9270000	5900000	5590000	7600000	5740000
P09103	P4hb	65900000	78600000	73700000	90400000	73100000	78300000	78700000	68600000	66000000	68800000	59900000	67200000	63400000	72900000
P09405	Ncl	7420000	6020000	5940000	6990000	7890000	8090000	8530000	7460000	7270000	8030000	5920000	7390000	9410000	8470000
P09411	Pgk1	63000000	55800000	77300000	57700000	58900000	67100000	78200000	60900000	60100000	60700000	62300000	56400000	55900000	57300000
P09528	Fth1	2800000	3700000	2310000	3440000	3220000	2530000	3010000	4620000	8620000	7680000	6500000	5450000	7520000	4560000
P09542	Myl3	NA	NA	442857	542931	NA	200337	465975	NA	NA	867671	NA	355788	376511	455444
P09671	Sod2	6910000	14800000	11300000	11800000	5590000	8070000	7100000	4320000	7160000	11000000	11600000	10100000	11800000	9440000
P09803	Cdh1	712939	650826	598480	677578	630692	741200	588764	572035	726987	662849	490077	541795	749913	862868
P09813	Apoa2	NA	NA	NA	NA	NA	206246	NA	282441	NA	197154	245834	664021	1030000	791346
P09925	Surf1	657912	NA	200870	527693	459910	377090	509241	652844	755921	660263	896291	702120	630666	705776
P09926	Surf2	NA	NA	129563	NA	NA	NA	NA	NA	NA	NA	114526	NA	NA	NA
P0C0S6;Q3THW5	H2az1;H2az2	14900000	7590000	30800000	17300000	20100000	14800000	15000000	1890000	19000000	22900000	12200000	23200000	21200000	4210000
P0C7L0	Wipf3	874687	999245	945888	731657	330737	640117	254610	315924	NA	150475	416214	474417	387961	254981
P0DN34	Ndufb1	3870000	5020000	4830000	3760000	3430000	4910000	5260000	3410000	5430000	4040000	4290000	8180000	6190000	5060000
P0DOV1	Mnda	194786	102389	NA	222995	348782	263487	352243	NA	306317	NA	NA	246857	303929	354874
P0DOV2	Ifi204	510896	567718	420892	368676	452957	489109	522873	282050	471766	463098	341666	472837	586445	650665
P0DP26;P0DP27;P0DP28	Calm1;Calm2;Calm3	5650000	6450000	7620000	5070000	5730000	5730000	5470000	5440000	4240000	6560000	5820000	4230000	3610000	4530000
P0DW87	Zftraf1	NA	NA	NA	NA	NA	NA	121465	NA	124636	135597	NA	NA	NA	NA
P10107	Anxa1	411374	NA	855501	577243	934513	648219	664423	609082	715344	1400000	977507	962672	741567	1090000
P10126	Eef1a1	405000000	430000000	366000000	344000000	447000000	385000000	401000000	331000000	431000000	357000000	308000000	382000000	404000000	421000000
P10493	Nid1	677405	676098	421606	617718	840391	609373	866943	782049	881649	775024	738356	621096	983312	832524
P10518	Alad	7140000	5540000	8060000	7740000	7290000	6290000	7610000	7780000	6990000	7430000	7250000	6920000	7380000	6550000
P10605	Ctsb	9000000	13100000	8820000	10900000	8700000	10600000	11400000	12800000	10300000	11500000	9440000	9170000	13600000	13800000
P10630	Eif4a2	5400000	4370000	10500000	6620000	8210000	5910000	7810000	6090000	4600000	7340000	8750000	4180000	4050000	4980000
P10637	Mapt	1080000	1160000	854785	788050	676047	992455	515789	819725	715794	724428	715014	958148	763811	701907
P10639	Txn	5100000	7220000	6330000	5960000	3580000	3600000	4890000	4150000	3930000	5080000	3430000	2840000	3680000	3270000
P10648	Gsta2	7100000	4820000	12100000	5970000	3990000	3990000	5890000	13400000	9720000	10800000	14100000	11200000	9120000	14500000
P10649	Gstm1	94900000	85600000	145000000	92900000	106000000	79900000	119000000	110000000	140000000	143000000	136000000	147000000	130000000	176000000
P10711	Tcea1	3720000	5770000	3260000	4070000	3310000	4750000	3450000	3640000	3670000	3750000	3800000	5070000	5020000	3100000
P10810	Cd14	NA	NA	NA	178209	NA	NA	NA	268225	444177	NA	NA	NA	NA	NA
P10833	Rras	307265	436482	238473	308077	368076	236733	393858	299079	481938	318378	294590	188866	286360	389914
P10852	Slc3a2	2120000	2650000	2150000	2880000	2910000	2120000	2730000	2530000	2260000	2160000	2330000	1760000	1940000	2770000
P10854;Q64478;Q64525;Q6ZWY9	H2bc14;H2bc8;H2bc9;Hist2h2bb	93200000	103000000	57300000	104000000	63900000	83700000	76600000	51400000	67700000	68900000	75900000	113000000	121000000	102000000
P10922	H1-0	124000000	175000000	89400000	163000000	37600000	149000000	47500000	35500000	47100000	55300000	27900000	171000000	197000000	97800000
P11031	Sub1	333071	258125	184473	254835	459226	393778	503171	358918	471335	463932	346032	349957	513325	349876
P11032	Gzma	NA	NA	NA	NA	NA	NA	NA	NA	NA	NA	NA	NA	NA	578842
P11087	Col1a1	14100000	40300000	15600000	24800000	22300000	25900000	18400000	17600000	22300000	37600000	29700000	21200000	33400000	18000000
P11103	Parp1	2260000	2460000	2170000	2220000	2800000	2100000	2740000	2280000	2840000	2710000	2180000	2400000	2660000	2720000
P11152	Lpl	NA	NA	NA	NA	118107	NA	NA	NA	77559.6	45631	NA	NA	NA	NA
P11247	Mpo	332614	394765	464604	500808	498115	572001	382993	454969	467639	449913	404113	704541	603805	869825
P11276	Fn1	12800000	10600000	9920000	11700000	11500000	12900000	12000000	11500000	10600000	9390000	7860000	9510000	11600000	11500000
P11352	Gpx1	55100000	60500000	63900000	54100000	31700000	36800000	44800000	57900000	41100000	51200000	58500000	53600000	46400000	45600000
P11404	Fabp3	NA	NA	NA	NA	NA	NA	NA	NA	NA	NA	2670000	NA	4250000	NA
P11438	Lamp1	765259	567061	228196	568460	401139	1070000	863875	NA	208138	351561	NA	657016	1110000	388059
P11499	Hsp90ab1	72800000	71900000	66900000	81400000	73500000	82100000	82900000	58600000	55600000	55700000	42000000	46100000	54400000	56100000
P11531	Dmd	1270000	943947	880062	874945	1150000	777048	945327	603714	999760	1080000	659593	1030000	785744	895695
P11589	Mup2	2130000	2650000	5760000	1450000	1950000	1810000	4150000	1860000	3800000	2780000	2200000	3250000	1760000	2670000
P11609	Cd1d1	1180000	997562	970443	985638	1210000	1160000	1160000	1140000	1310000	1320000	1100000	1000000	1460000	868314
P11679	Krt8	77200000	98200000	78100000	100000000	85200000	88900000	72400000	74500000	74100000	94000000	70200000	82700000	98100000	85800000
P11680	Cfp	567974	681238	287943	428762	332457	364134	537950	809396	576009	846864	498459	739948	577591	560387
P11688	Itga5	1340000	1580000	999791	1240000	1410000	1550000	1240000	1180000	1130000	1310000	898472	1050000	1060000	1230000
P11714	Cyp2d9	80400000	54800000	67700000	66900000	95400000	76600000	87800000	119000000	67700000	88800000	70400000	51700000	72300000	72900000
P11725	Otc	37700000	31800000	41600000	35200000	33800000	35700000	39800000	39600000	46600000	54300000	61600000	48400000	43600000	43400000
P11835	Itgb2	414194	394104	NA	373968	290724	476293	NA	348098	296539	369136	NA	416563	524434	502480
P11859	Agt	1180000	695571	1340000	1270000	995713	779579	1210000	1700000	957332	1700000	1740000	1170000	1180000	1580000
P11862	Gas2	4080000	3670000	3260000	3510000	3430000	3110000	3520000	2970000	2640000	2220000	3500000	2920000	2330000	3300000
P11881	Itpr1	644619	583009	616927	620472	823129	804805	698572	639318	499537	690340	609773	723004	572534	615509
P11928	Oas1a	150668	NA	170894	NA	222345	133345	361875	198413	NA	144113	182946	136537	108541	288256
P11930	Nudt19	2130000	2460000	3400000	1820000	2450000	2870000	2560000	2260000	2240000	3010000	3090000	2120000	1680000	2370000
P11983	Tcp1	3050000	2510000	5550000	3310000	3980000	3060000	3620000	3030000	3510000	3920000	4710000	3540000	3080000	3860000
P12246	Apcs	NA	619626	NA	912493	NA	NA	NA	NA	655990	NA	NA	NA	NA	721759
P12265	Gusb	1720000	1530000	1470000	1220000	1480000	1630000	1580000	2350000	2170000	1750000	1740000	1590000	1910000	1810000
P12367	Prkar2a	1600000	1930000	1900000	2480000	2690000	2020000	2100000	2130000	1990000	1860000	1970000	1720000	1880000	2020000
P12382	Pfkl	2030000	2000000	1850000	2060000	2640000	2420000	2740000	1850000	2190000	1730000	1900000	1580000	1630000	1830000
P12710	Fabp1	660000000	682000000	617000000	684000000	243000000	540000000	366000000	223000000	322000000	393000000	255000000	697000000	643000000	447000000
P12787	Cox5a	11400000	10200000	12600000	11000000	5590000	6010000	6290000	8460000	5270000	8630000	9520000	14300000	13000000	9830000
P12790	Cyp2b9	279165	637303	391117	NA	334998	313006	354045	219912	NA	NA	NA	NA	1630000	NA
P12791	Cyp2b10	923487	722485	1270000	1110000	841085	1070000	792509	907366	712225	831934	470987	403318	854489	1100000
P12815	Pdcd6	310336	423588	484961	510134	547279	495058	460366	501811	253574	667275	646215	387367	428157	402244
P12970	Rpl7a	152000000	123000000	108000000	131000000	99300000	145000000	133000000	95900000	118000000	106000000	97500000	117000000	126000000	99400000
P12979	Myog	478082	571552	330775	765238	209112	742050	352030	290675	367445	NA	242975	780548	1600000	623262
P13020	Gsn	4350000	3020000	2720000	3490000	4360000	3750000	4680000	6280000	5120000	4460000	5060000	4490000	4180000	6270000
P13412	Tnni2	NA	140507	NA	250005	NA	259772	167472	NA	NA	NA	NA	NA	NA	NA
P13439	Umps	NA	360606	624085	NA	692912	663590	588186	537650	409097	558923	761982	465883	401308	380935
P13516	Scd1	1510000	1010000	1850000	1010000	5490000	2960000	2260000	1330000	1900000	1410000	921204	780219	922772	1140000
P13542	Myh8	639744	394109	NA	NA	NA	NA	NA	784065	NA	NA	NA	353689	NA	629973
P13597	Icam1	2050000	2430000	2050000	1950000	2250000	2360000	2290000	3150000	2540000	2390000	2220000	2680000	3180000	4330000
P13634	Ca1	4780000	5780000	5010000	7300000	4440000	3720000	5150000	14600000	3810000	7060000	12000000	12100000	6750000	10900000
P13707	Gpd1	15300000	12500000	19700000	14800000	19500000	14900000	21400000	17900000	13300000	18100000	15700000	13100000	19700000	13200000
P13864	Dnmt1	NA	NA	270327	NA	185259	245019	NA	213933	NA	NA	NA	377870	249962	315503
P14094	Atp1b1	18600000	17400000	14200000	15500000	14700000	15300000	11100000	9810000	13400000	12100000	8790000	9150000	12700000	10500000
P14106	C1qb	294027	672946	559576	855611	533512	533066	415412	427261	516393	470003	583472	NA	419623	686310
P14115	Rpl27a	135000000	97500000	126000000	91400000	109000000	141000000	116000000	111000000	115000000	137000000	122000000	124000000	124000000	143000000
P14131	Rps16	36700000	46400000	49800000	44600000	29100000	38200000	36400000	24300000	35800000	35900000	30100000	40000000	39100000	39200000
P14148	Rpl7	45600000	23900000	56600000	29300000	41500000	50800000	52200000	38000000	42900000	48100000	46800000	58200000	47800000	51500000
P14152	Mdh1	71900000	74900000	158000000	152000000	88100000	89500000	101000000	66900000	76900000	94100000	81100000	93300000	98500000	111000000
P14206	Rpsa	3750000	2770000	6550000	3860000	3490000	3670000	4590000	4170000	4950000	5790000	8980000	8030000	7300000	5910000
P14211	Calr	25600000	19000000	24300000	19700000	22300000	27000000	25400000	21800000	19500000	20700000	13700000	13200000	19200000	19000000
P14246	Slc2a2	3880000	3750000	2150000	2950000	2830000	2840000	2850000	2250000	2950000	2400000	1880000	2190000	3130000	1930000
P14429;P14431	H2-Q7;H2-Q9	NA	177734	NA	230062	NA	NA	NA	NA	NA	NA	NA	NA	NA	353702
P14576	Srp54	2610000	1720000	3660000	2430000	2950000	3830000	3050000	2080000	2620000	2440000	2610000	2830000	1900000	2120000
P14602	Hspb1	652089	1340000	766403	763231	510111	652194	872909	5910000	4450000	3010000	2430000	3930000	3790000	7960000
P14685	Psmd3	4450000	4520000	4900000	4250000	6210000	4260000	5360000	4330000	4690000	5300000	4800000	3720000	4650000	4160000
P14733	Lmnb1	2530000	1310000	2170000	2300000	3460000	3120000	3460000	2560000	3930000	3170000	2850000	3560000	3200000	3850000
P14824	Anxa6	12900000	13000000	16600000	15400000	21000000	15600000	19400000	16700000	19900000	19300000	18400000	15100000	15100000	15500000
P14869	Rplp0	16900000	16800000	23900000	15600000	16900000	15000000	24100000	16000000	17300000	20600000	19500000	17100000	15500000	19800000
P14901	Hmox1	288246	232517	223782	259722	293850	206582	342496	274032	233693	235321	301535	189167	254514	449524
P15066	Jund	NA	183616	158230	120543	48892.6	NA	NA	NA	58207.2	NA	NA	69690.6	NA	NA
P15089	Cpa3	NA	NA	NA	NA	NA	NA	NA	NA	NA	NA	NA	NA	NA	NA
P15105	Glul	136000000	98700000	163000000	97000000	139000000	127000000	178000000	118000000	147000000	138000000	114000000	128000000	101000000	139000000
P15116	Cdh2	2750000	4540000	3500000	4280000	5280000	4700000	4890000	4710000	3700000	4340000	4730000	3120000	3920000	3060000
P15208	Insr	325854	544661	415723	414752	557602	455583	540790	600775	498152	627055	623585	606248	572269	559013
P15307	Rel	328921	200860	236315	263149	301042	185080	281180	249440	258762	239612	256971	154762	NA	NA
P15327	Bpgm	1300000	1170000	1700000	1770000	1270000	1040000	1030000	4020000	1470000	2590000	5010000	2730000	1650000	3180000
P15379	Cd44	619776	459269	475643	513493	735385	916801	1050000	690805	478034	959472	468195	853850	515134	2080000
P15392	Cyp2a4	850762	4190000	10300000	10600000	4340000	NA	4890000	NA	NA	4430000	2980000	NA	NA	1970000
P15508	Sptb	1610000	1180000	1580000	1850000	2010000	1840000	1800000	4510000	1840000	2570000	3520000	3520000	2300000	4040000
P15532	Nme1	3630000	4600000	3430000	4510000	1420000	3350000	2150000	3600000	3760000	4500000	3320000	3250000	2800000	5450000
P15535	B4galt1	478707	423172	395971	419310	629099	551171	694473	407249	401484	360027	428036	175652	227952	276114
P15626	Gstm2	988192	1280000	1810000	1150000	1340000	979891	1530000	1580000	1380000	2300000	2230000	1790000	1570000	2110000
P15864	H1-2	576803	2370000	460237	3970000	134078	1080000	84119.9	NA	NA	202579	119822	596152	422511	250220
P16015	Ca3	128000000	83200000	205000000	95700000	92500000	109000000	137000000	75100000	56200000	96400000	96900000	66900000	73400000	55400000
P16045	Lgals1	16700000	26500000	31300000	27400000	16700000	13300000	22100000	11500000	9430000	14200000	11800000	13500000	15900000	16100000
P16056	Met	266776	275245	229375	357226	232920	206079	296214	277934	490518	319530	302424	218126	338742	338146
P16110	Lgals3	248895	355383	327374	NA	197716	198624	241076	235887	183819	323745	335793	380254	504932	748240
P16125	Ldhb	470323	359366	NA	609906	411496	405266	533827	666693	636640	597942	551316	453467	469991	551271
P16254	Srp14	5450000	4800000	5110000	5830000	4470000	5770000	5100000	5200000	5700000	5350000	4820000	5250000	5330000	4990000
P16294	F9	1440000	1210000	1170000	1110000	1180000	1370000	1040000	1300000	979817	800737	653740	682993	853431	889109
P16301	Lcat	886297	891892	1050000	1370000	1290000	1200000	1910000	1130000	1500000	1010000	1100000	1220000	1080000	1610000
P16330	Cnp	139084	262159	206335	127876	325515	180030	250745	267321	349859	334718	310529	176644	192488	234409
P16331	Pah	91100000	74400000	99800000	79500000	134000000	95500000	134000000	84400000	98400000	110000000	91600000	83100000	69900000	95100000
P16332	Mmut	10900000	7760000	10700000	9800000	14100000	11200000	14500000	11900000	14900000	15700000	14100000	11300000	14400000	11500000
P16406	Enpep	2850000	3150000	2470000	2940000	3020000	3210000	2530000	4100000	3000000	2770000	2750000	2700000	3530000	3220000
P16460	Ass1	338000000	265000000	368000000	280000000	365000000	266000000	365000000	283000000	351000000	353000000	345000000	294000000	254000000	371000000
P16546	Sptan1	9960000	10100000	9680000	10100000	10900000	11700000	11200000	10700000	11800000	12100000	10400000	12100000	11500000	11900000
P16627	Hspa1l	NA	NA	NA	NA	473098	225462	830778	547940	787247	761526	1480000	994046	1100000	807356
P16675	Ctsa	1420000	2040000	1320000	1450000	1110000	1200000	923200	1300000	1840000	1780000	1970000	1700000	1520000	1510000
P16858	Gapdh	57400000	45000000	53600000	47400000	65700000	59800000	80500000	68600000	72100000	57000000	50100000	48800000	57400000	64000000
P17047	Lamp2	5560000	9000000	4310000	6300000	5830000	5660000	5890000	5720000	5710000	7000000	4950000	5330000	5800000	5850000
P17095	Hmga1	3230000	5860000	2520000	4150000	1580000	2570000	1900000	NA	3120000	2380000	2770000	2320000	2640000	2020000
P17156	Hspa2	8770000	10300000	8440000	9750000	12800000	9260000	11400000	11000000	10900000	9380000	9300000	12400000	10600000	10400000
P17182	Eno1	111000000	95600000	112000000	119000000	134000000	89900000	148000000	108000000	129000000	124000000	126000000	111000000	123000000	121000000
P17183	Eno2	NA	NA	NA	NA	NA	NA	NA	NA	NA	NA	NA	NA	NA	NA
P17225	Ptbp1	5390000	4540000	6390000	4890000	5460000	5150000	3730000	2780000	4980000	5280000	6610000	5220000	3830000	4020000
P17426	Ap2a1	2270000	1700000	1960000	2080000	2400000	2120000	2170000	2460000	2170000	1860000	2250000	1970000	1520000	1500000
P17427	Ap2a2	4780000	4760000	4990000	5190000	6190000	5890000	5290000	4680000	4380000	3920000	3490000	3470000	4240000	4410000
P17439	Gba1	1250000	1120000	753121	1440000	1030000	968431	1200000	1830000	1180000	1250000	1250000	1280000	1420000	1040000
P17563	Selenbp1	138000000	133000000	106000000	154000000	84500000	157000000	129000000	67600000	71400000	84900000	51900000	50200000	71700000	54500000
P17665	Cox7c	1530000	1440000	1050000	1120000	487733	1610000	1160000	469853	1060000	1070000	646113	1960000	1750000	1630000
P17710	Hk1	1310000	1490000	1100000	1360000	1310000	1330000	1330000	1540000	1440000	1290000	1640000	1240000	1270000	1560000
P17717	Ugt2b17	20200000	16500000	16100000	16200000	13200000	16800000	15500000	11000000	12700000	9390000	7920000	8950000	16200000	11500000
P17742	Ppia	225000000	335000000	221000000	248000000	147000000	227000000	191000000	210000000	193000000	207000000	214000000	241000000	256000000	206000000
P17751	Tpi1	30000000	21200000	36400000	30400000	17800000	20500000	22000000	25700000	23800000	29100000	30500000	28000000	22900000	25600000
P17879	Hspa1b	5070000	4980000	4330000	4860000	4140000	5490000	6110000	10200000	8180000	8660000	7730000	6820000	7310000	13100000
P17918	Pcna	303244	386563	592361	493478	580358	430199	619103	575275	446403	525703	426905	449190	487980	584431
P18052	Ptpra	818344	619056	521097	554177	971509	865029	795710	864611	715015	568591	502280	567471	990054	715383
P18242	Ctsd	10800000	11500000	10500000	11800000	12600000	10500000	13100000	22700000	19200000	21600000	17200000	15200000	18800000	20700000
P18528	NA	374597	360809	398757	506496	396281	435886	548780	856207	390134	487253	644735	423113	579363	801629
P18531	Ighv3-6	207155	325385	130974	NA	164702	142725	98439.3	NA	195728	58731.3	NA	138132	NA	279269
P18572	Bsg	14900000	21400000	16100000	18600000	14900000	13400000	13700000	2710000	13900000	11100000	18800000	12600000	12500000	15600000
P18581	Slc7a2	1140000	637194	1060000	518326	1070000	1090000	679622	1620000	2690000	2250000	1420000	1830000	1920000	3480000
P18653	Rps6ka1	711169	1010000	955954	872204	857745	698944	759223	743290	693713	1260000	737597	736763	782992	894888
P18654	Rps6ka3	434227	NA	NA	NA	288302	NA	169982	50119.6	113614	98122.9	76712.9	NA	NA	NA
P18760	Cfl1	15900000	13200000	22700000	18200000	11700000	15500000	13700000	15000000	17300000	17900000	16000000	19200000	16200000	19500000
P18826	Phka1	510802	253743	768021	156232	538065	638503	464073	537854	666852	504279	391522	531789	566859	170685
P18828	Sdc1	700970	1160000	NA	514533	557678	633585	315857	312288	177395	356080	257244	235718	324267	167872
P19001	Krt19	846035	1280000	663577	1160000	1280000	1020000	656317	635458	613516	1120000	1210000	859481	2110000	439184
P19096	Fasn	26400000	20300000	22600000	22800000	40600000	22100000	25600000	22000000	23200000	19000000	17000000	13000000	18500000	15900000
P19157	Gstp1	106000000	97900000	116000000	82000000	76100000	76700000	140000000	185000000	169000000	178000000	201000000	120000000	152000000	111000000
P19221	F2	3250000	3560000	3760000	3790000	4270000	3460000	4030000	5100000	3970000	3450000	2860000	3480000	3680000	3640000
P19253	Rpl13a	90100000	54000000	52900000	55000000	49000000	82300000	64700000	35700000	53300000	54400000	48700000	64900000	68800000	55800000
P19258	Mpv17	184056	NA	NA	200184	386061	282121	NA	NA	359300	258189	307390	NA	301378	635606
P19324	Serpinh1	2050000	2180000	2260000	2190000	3390000	3040000	3500000	2590000	2920000	3080000	3050000	3810000	2330000	4370000
P19426	Nelfe	916268	1160000	876243	888318	687791	740556	601046	794123	603077	879115	1060000	930114	951929	639838
P19536	Cox5b	8940000	10100000	5340000	6650000	8010000	11100000	12100000	5660000	11300000	7730000	6830000	16400000	12500000	10000000
P19639	Gstm3	766432	844591	1300000	745305	1310000	1170000	1610000	1790000	1920000	2350000	1960000	2230000	1860000	3130000
P19783	Cox4i1	65400000	53300000	55700000	52100000	47900000	62000000	58200000	55700000	62400000	59000000	45200000	52000000	80900000	65700000
P19973	Lsp1	1120000	1800000	1110000	3300000	1820000	1800000	1080000	1320000	1010000	1490000	962107	1350000	1650000	4930000
P20029	Hspa5	120000000	104000000	109000000	136000000	110000000	137000000	142000000	106000000	124000000	129000000	109000000	114000000	132000000	139000000
P20060	Hexb	526505	486367	451561	498011	535319	572395	545630	975905	772555	545104	544021	984888	618939	642152
P20108	Prdx3	1830000	3020000	1340000	4080000	1900000	2780000	2420000	4640000	3490000	2960000	2680000	4110000	4160000	3700000
P20152	Vim	6170000	8360000	7880000	10800000	13900000	12900000	9990000	8080000	9700000	17100000	11800000	10300000	12700000	14800000
P20444	Prkca	340102	175762	435610	377450	768171	518674	420869	563340	704876	830109	649753	705180	659964	481377
P20801	Tnnc2	NA	NA	NA	NA	NA	NA	NA	NA	134038	NA	NA	104047	NA	NA
P20852	Cyp2a5	7740000	8260000	14000000	10200000	10300000	10800000	12300000	18700000	15600000	15700000	15000000	13200000	15900000	18600000
P20918	Plg	5950000	4660000	4740000	4640000	4620000	5710000	4760000	6270000	5360000	4470000	3820000	3950000	3640000	4580000
P21107	Tpm3	289354	348844	312592	386847	357435	661609	493953	636446	385532	536682	727386	494672	703189	439848
P21126	Ubl4a	383225	370346	NA	NA	NA	NA	NA	NA	NA	NA	NA	NA	NA	NA
P21180	C2	445232	400819	259840	210899	323576	345352	392734	319686	284528	167200	192791	249781	277426	269363
P21271	Myo5b	255790	219314	184602	244784	356143	313687	347432	184833	312170	282525	305956	190598	283099	254054
P21278	Gna11	4020000	3270000	5070000	3840000	5140000	4370000	3760000	3970000	5790000	4790000	4060000	3630000	3870000	4750000
P21279	Gnaq	829735	1070000	1320000	1010000	1450000	1210000	1030000	1110000	1340000	516824	1360000	983354	880467	1080000
P21300	Akr1b7	152424	59828.8	387291	140676	350473	260242	487860	519804	531402	553898	683349	562887	177000	NA
P21440	Abcb4	10400000	9750000	10900000	11200000	12400000	12800000	10300000	12700000	12600000	10800000	9360000	9010000	11300000	13300000
P21447	Abcb1a	NA	NA	NA	NA	NA	NA	NA	NA	NA	NA	NA	NA	NA	NA
P21460	Cst3	995564	870251	826570	900251	913484	835739	987775	1100000	1110000	1400000	1500000	1020000	1020000	434867
P21550	Eno3	9140000	1620000	5420000	2190000	10600000	4290000	10300000	5870000	9440000	6670000	6410000	4510000	3920000	5450000
P21570	Ang	NA	140717	136252	141022	NA	177523	277493	NA	237143	231460	274534	141463	205510	193370
P21614	Gc	14500000	11900000	12000000	13700000	15100000	14400000	15200000	14200000	17300000	14700000	12100000	15000000	11700000	15000000
P21619	Lmnb2	5250000	3830000	4560000	4650000	4890000	5940000	5800000	6080000	6980000	6180000	5490000	7640000	6230000	7810000
P21812	Mcpt4	NA	310810	NA	424607	NA	706077	NA	1350000	NA	NA	NA	NA	NA	NA
P21844	Cma1	NA	NA	NA	NA	NA	NA	NA	NA	NA	NA	NA	NA	NA	NA
P21958	Tap1	114157	302084	NA	111625	125913	214467	151495	287269	NA	NA	NA	NA	NA	113312
P21981	Tgm2	11000000	12500000	12400000	13700000	12500000	14000000	12300000	11500000	12200000	12500000	9090000	10800000	13700000	17100000
P21995	Emb	4710000	3850000	5010000	4390000	5930000	5200000	4670000	5120000	4320000	5110000	6820000	4320000	4460000	5160000
P22315	Fech	2330000	2850000	5190000	2800000	3230000	2530000	4190000	4450000	5020000	5540000	7480000	3550000	3770000	3580000
P22361	Hnf1a	703853	760704	865390	790036	916289	660276	782748	405436	677918	697570	715612	752713	544726	634706
P22437	Ptgs1	1780000	4330000	NA	1930000	1450000	1310000	1330000	NA	1510000	1400000	1350000	NA	1050000	NA
P22599	Serpina1b	9840000	6460000	9870000	8410000	7940000	6000000	6900000	21000000	9030000	17000000	8120000	11300000	5450000	14600000
P22682	Cbl	404342	488313	270299	271455	320497	304421	153959	278792	161058	192519	65350.8	304559	259191	322997
P22892	Ap1g1	1050000	1180000	1610000	1500000	1730000	1330000	1390000	1030000	1080000	1210000	1150000	889337	1050000	1140000
P22907	Hmbs	1110000	984101	687147	1550000	831367	445518	1010000	665458	800762	1110000	642081	787398	679489	779023
P23116	Eif3a	10400000	9110000	10000000	9530000	11200000	9860000	12000000	10000000	10100000	9100000	10400000	8420000	9700000	8640000
P23198	Cbx3	1570000	1780000	1450000	1810000	1430000	1830000	1560000	1570000	1650000	1840000	1540000	1600000	1880000	1470000
P23249	Mov10	2370000	1840000	2410000	2200000	2880000	2700000	2510000	2490000	3020000	2910000	2440000	1660000	2320000	2990000
P23475	Xrcc6	1730000	1820000	1860000	1720000	1910000	2500000	2490000	2280000	2170000	2430000	2300000	2610000	2670000	2410000
P23492	Pnp	2680000	1520000	3280000	2330000	2670000	2410000	3430000	4220000	2940000	3760000	3850000	3150000	3550000	3640000
P23506	Pcmt1	324572	281191	736552	380993	652952	278027	894057	711683	680963	823476	1080000	788188	684805	769113
P23589	Ca5a	7340000	6290000	10700000	8930000	11600000	7250000	10300000	8410000	8290000	13100000	15600000	7380000	8900000	8630000
P23591	Gfus	7670000	8570000	7650000	6910000	7810000	6750000	8330000	8260000	8410000	8570000	9630000	7060000	7510000	7590000
P23708	Nfya	NA	NA	NA	NA	NA	NA	NA	NA	NA	19999.8	28250.5	NA	NA	NA
P23780	Glb1	1110000	1180000	1000000	971874	1340000	1040000	1370000	1750000	2390000	1820000	1530000	1530000	1580000	1630000
P23881	Tcea3	2920000	2770000	2430000	2730000	3310000	3440000	2740000	1130000	1930000	2070000	1970000	2420000	2460000	1830000
P23950	Zfp36l1	NA	171621	284325	151218	229334	222923	217796	234709	221567	273549	158433	217309	NA	141462
P23953	Ces1c	1710000	1770000	1790000	2410000	1920000	1650000	1630000	3060000	2060000	3370000	2220000	2020000	1990000	2290000
P24063	Itgal	691974	779937	627191	773059	1100000	784913	1110000	823898	1330000	1330000	1130000	1550000	1250000	1620000
P24270	Cat	429000000	452000000	434000000	406000000	377000000	424000000	380000000	294000000	348000000	306000000	254000000	332000000	297000000	324000000
P24369	Ppib	60700000	55000000	52400000	56600000	36700000	54300000	48600000	53300000	48000000	44200000	47100000	50500000	54200000	48400000
P24452	Capg	2520000	2420000	2180000	2940000	1780000	2860000	2290000	1460000	2120000	2830000	1380000	2750000	2630000	4710000
P24456	Cyp2d10	106000000	132000000	133000000	130000000	130000000	171000000	129000000	101000000	109000000	115000000	84700000	98200000	114000000	113000000
P24472	Gsta4	3920000	3520000	5860000	3660000	3600000	2950000	4470000	5650000	5270000	4530000	5120000	4420000	4000000	5170000
P24527	Lta4h	4000000	3310000	4730000	3760000	4830000	3420000	4460000	4580000	4250000	4180000	4170000	3520000	3680000	3280000
P24547	Impdh2	3150000	3480000	3820000	4400000	4210000	3090000	4550000	3870000	3880000	4110000	3950000	3810000	3750000	3800000
P24549	Aldh1a1	178000000	169000000	399000000	223000000	289000000	216000000	367000000	243000000	240000000	330000000	331000000	222000000	236000000	246000000
P24638	Acp2	2880000	2750000	1670000	2170000	1420000	2420000	2000000	875308	2320000	1860000	1470000	2200000	2670000	2880000
P24668	M6pr	5120000	4950000	4480000	4090000	4450000	4720000	7050000	5530000	4070000	3200000	2310000	3000000	2860000	2300000
P24721	Asgr2	391374	610641	346018	379750	395043	364431	181678	340121	240793	334136	198987	132664	300635	232093
P24788	Cdk11b	546796	575526	567286	670946	712391	610943	786122	583342	747068	497087	574683	439605	608772	720803
P24815	Hsd3b1	1670000	830855	1070000	1300000	3760000	1970000	1480000	2920000	2340000	1760000	1620000	1070000	1150000	1420000
P25206	Mcm3	261028	148897	370050	318918	170396	NA	229755	NA	NA	293676	193429	NA	NA	614952
P25425	Pou2f1	39414.8	47875.4	31570.4	NA	24178.1	NA	NA	NA	NA	NA	63555.7	NA	NA	NA
P25444	Rps2	7000000	6750000	9650000	7470000	7490000	9100000	10300000	6670000	7930000	9430000	8430000	9020000	6980000	6870000
P25446	Fas	NA	NA	115149	NA	105109	155850	236284	90045.1	NA	NA	NA	NA	NA	NA
P25688	Uox	180000000	129000000	221000000	165000000	220000000	162000000	212000000	125000000	165000000	170000000	153000000	140000000	125000000	131000000
P25799	Nfkb1	168044	NA	241304	271092	454754	399661	367544	133257	359473	171718	211633	52135	NA	248507
P25911	Lyn	2400000	2000000	1920000	2590000	2120000	2310000	2200000	2380000	2780000	2280000	2310000	2340000	2380000	1810000
P25976	Ubtf	2320000	2170000	1830000	1910000	2010000	2100000	2100000	2230000	2560000	2620000	2420000	2510000	2880000	2280000
P26039	Tln1	10000000	6620000	10400000	8140000	10200000	8700000	10200000	10900000	10500000	11800000	11700000	11000000	9390000	12300000
P26040	Ezr	1950000	1970000	2040000	1560000	3240000	2840000	3080000	2430000	2010000	3940000	2340000	3730000	3070000	3610000
P26041	Msn	4140000	3550000	2910000	4350000	3750000	4770000	4070000	3320000	3750000	4370000	3200000	4960000	5000000	6830000
P26043	Rdx	30000000	31200000	32000000	30600000	29600000	32900000	31500000	30600000	27000000	28500000	27000000	33200000	36200000	33100000
P26150	Hsd3b3	8420000	6890000	7180000	6760000	8700000	12300000	11300000	9020000	7740000	8460000	6900000	6470000	7850000	6780000
P26187	Mgmt	473783	349189	427891	513006	303770	310236	340145	483988	431445	462521	485445	333155	404536	311545
P26231	Ctnna1	4230000	3300000	4270000	4200000	4400000	4230000	5090000	4720000	4430000	4740000	3610000	4980000	5030000	4610000
P26262	Klkb1	2530000	2590000	2250000	2260000	2100000	2800000	2300000	2240000	2120000	2100000	1750000	2030000	2030000	2200000
P26350	Ptma	2160000	9620000	1330000	5600000	358489	752161	203777	359312	352469	581198	382473	3110000	2380000	400880
P26369	U2af2	2880000	2500000	2300000	3230000	2610000	2660000	2840000	2830000	2350000	2950000	2890000	1990000	3160000	2550000
P26443	Glud1	234000000	129000000	204000000	178000000	228000000	225000000	288000000	243000000	272000000	252000000	243000000	258000000	229000000	309000000
P26450	Pik3r1	708839	355417	563366	691717	731535	783351	590061	588656	565467	513926	620160	852887	941812	821130
P26516	Psmd7	3320000	3920000	3660000	3880000	3600000	3830000	3020000	2570000	2890000	3380000	3100000	3860000	4720000	5170000
P26638	Sars1	8830000	7440000	7250000	6780000	10500000	9500000	9220000	10700000	9690000	9480000	8970000	9690000	11200000	12100000
P26883	Fkbp1a	1880000	3250000	2120000	2430000	1440000	1860000	1580000	2160000	2240000	2540000	1890000	2050000	2440000	1390000
P26928	Mst1	958655	1810000	1010000	1180000	526312	638839	750717	680080	481130	579466	412128	457774	520077	447915
P26952	Il3ra	650986	173217	905032	386773	1420000	1100000	1270000	833337	1690000	1140000	810556	800912	1070000	884538
P27046	Man2a1	1070000	942203	1140000	1210000	1510000	1620000	1430000	980987	1270000	1010000	906570	1000000	1040000	1210000
P27048	Snrpb	2880000	2620000	4040000	3710000	2610000	2680000	2800000	3430000	3560000	3810000	4580000	4090000	3650000	3500000
P27546	Map4	2710000	3070000	1750000	2040000	1520000	977962	692116	1880000	1250000	1610000	1540000	1370000	979473	875088
P27600	Gna12	479793	NA	411249	304883	469955	346870	417297	312476	370381	474466	437893	422105	283511	422487
P27601	Gna13	17900000	11900000	21800000	21100000	22400000	17200000	22500000	22800000	25300000	19700000	27000000	30400000	21700000	24200000
P27612	Plaa	1470000	1550000	1540000	1580000	1910000	1840000	2010000	1960000	1380000	1470000	1350000	1130000	1460000	1620000
P27641	Xrcc5	1560000	1500000	1320000	1670000	2450000	1750000	1980000	2320000	2300000	1380000	2240000	1840000	1850000	1860000
P27656	Lipc	814903	563230	546234	525195	798262	527175	660293	597694	442924	476311	515902	451071	470566	579829
P27659	Rpl3	80100000	84500000	68400000	80200000	102000000	95300000	99300000	57100000	84800000	67600000	72400000	71900000	69800000	81300000
P27661	H2ax	2200000	NA	4870000	465666	5030000	969308	8650000	NA	5090000	3150000	3500000	4630000	3580000	3280000
P27773	Pdia3	135000000	107000000	133000000	113000000	141000000	128000000	156000000	137000000	162000000	126000000	128000000	113000000	113000000	131000000
P27786	Cyp17a1	NA	NA	NA	NA	209006	NA	NA	NA	NA	NA	NA	NA	NA	NA
P27808	Mgat1	312931	300568	399858	361112	445767	405664	431401	492618	422634	366567	433695	227869	367395	476453
P27870	Vav1	172986	109602	130838	190012	119140	238749	261824	82023.9	107582	139682	170189	197145	NA	130497
P28028	Braf	581542	66861.5	474079	135220	687816	237412	281153	570148	464935	539483	572809	527313	611681	488553
P28033	Cebpb	NA	370216	NA	NA	203872	NA	NA	NA	268162	NA	NA	603457	397371	NA
P28063	Psmb8	2230000	3120000	1400000	2330000	2560000	3800000	3190000	2250000	1180000	1790000	2580000	2080000	1490000	3450000
P28076	Psmb9	NA	954457	670981	745658	428559	542730	NA	362286	678977	555994	NA	551125	NA	NA
P28230	Gjb1	1410000	735979	1190000	2430000	3720000	2940000	3120000	1570000	2600000	3390000	2270000	1860000	3780000	1180000
P28271	Aco1	27000000	17500000	24500000	22600000	35500000	25500000	34600000	25900000	27700000	26400000	27000000	22400000	23700000	24700000
P28352	Apex1	8640000	12000000	5510000	7620000	7240000	7180000	6500000	6940000	7100000	5310000	4080000	7650000	7250000	5620000
P28474	Adh5	35700000	32400000	33100000	40400000	50500000	41800000	40400000	34500000	44300000	36000000	32900000	21100000	34600000	31600000
P28574	Max	NA	51373.8	NA	NA	NA	NA	NA	NA	NA	NA	NA	NA	NA	NA
P28650	Adss1	2440000	1230000	2220000	876821	4580000	2010000	3250000	3080000	4490000	3070000	3380000	3410000	3620000	3090000
P28651	Ca8	1730000	3520000	2590000	1730000	3420000	2680000	2810000	2380000	1910000	1860000	3180000	2130000	2540000	2580000
P28653	Bgn	2500000	3550000	2350000	2660000	6460000	3640000	3390000	2680000	3240000	4470000	2720000	3070000	4650000	3850000
P28654	Dcn	1230000	2790000	1790000	1960000	2800000	3030000	1600000	1180000	2040000	2280000	1590000	2470000	2980000	2130000
P28656	Nap1l1	4140000	4590000	4460000	4910000	5570000	4720000	5010000	4630000	4120000	4620000	3890000	3510000	5630000	4410000
P28658	Atxn10	404923	480850	134484	567551	754848	573585	844169	1010000	771360	712441	919666	590342	704002	819997
P28659	Celf1	1110000	1310000	1490000	1110000	1070000	1080000	1010000	1420000	1170000	1190000	1280000	1060000	1040000	952058
P28660	Nckap1	315041	231495	364852	482967	262892	467600	306415	130175	227004	333362	230624	403714	391657	163844
P28661	Septin4	829443	1850000	1050000	1790000	1710000	2120000	1400000	1240000	959320	1520000	1290000	1490000	1820000	1520000
P28665	Mug1	13800000	12700000	10600000	12200000	15400000	12800000	18100000	25000000	21800000	20600000	18400000	17700000	18900000	23300000
P28666	Mug2	1320000	1510000	1460000	1850000	1930000	1570000	1750000	1700000	1600000	1440000	1160000	1070000	1190000	1230000
P28700	Rxra	1120000	1160000	NA	1370000	1490000	881305	NA	1740000	944780	742043	NA	1040000	610068	1570000
P28740	Kif2a	625202	542311	595580	677004	781698	787333	546894	650173	678141	603965	654199	665059	487808	570134
P28798	Grn	2430000	751924	970457	1020000	1420000	1800000	1810000	1890000	1770000	2180000	1040000	1630000	2360000	3040000
P28843	Dpp4	3160000	4970000	3190000	4940000	3840000	4090000	3690000	3860000	3580000	4330000	3430000	2890000	4520000	3420000
P29341	Pabpc1	56900000	42700000	37000000	37900000	35100000	44500000	36700000	40300000	33700000	36000000	33000000	41600000	34800000	38500000
P29351	Ptpn6	1870000	2060000	1820000	2020000	2060000	1800000	2030000	1670000	1420000	1790000	1400000	1350000	1450000	2090000
P29391	Ftl1	4660000	4680000	4670000	4700000	5380000	4430000	5110000	10200000	12000000	12000000	9010000	8360000	10600000	6700000
P29416	Hexa	1070000	533062	805881	728883	902850	980127	1410000	1100000	1070000	1070000	1560000	1380000	1530000	1360000
P29452	Casp1	181925	292808	240884	205690	123206	229578	176857	326038	221332	361534	253726	300035	195833	278972
P29533	Vcam1	319480	291618	384070	416212	279226	NA	440272	360165	337069	226090	311661	410412	256177	472863
P29595	Nedd8	630611	400828	225311	301010	650466	826089	862720	736444	1200000	925730	782420	868711	490343	1350000
P29699	Ahsg	10400000	9800000	7970000	8640000	13000000	9510000	12000000	18800000	15500000	17500000	12100000	12600000	9910000	16400000
P29758	Oat	10200000	10000000	31000000	20600000	25500000	16800000	27100000	17500000	17900000	25100000	31800000	22200000	16900000	30900000
P29788	Vtn	3400000	2680000	2350000	2890000	2080000	2700000	2570000	2880000	2140000	1920000	1630000	1850000	2030000	2620000
P30115	Gsta3	84400000	83100000	123000000	76000000	63200000	62000000	75100000	66100000	67700000	65200000	76200000	94600000	57500000	62300000
P30204	Msr1	NA	NA	78648.7	NA	NA	NA	80318.6	61673.9	NA	NA	205487	NA	98808.5	191195
P30275	Ckmt1	NA	NA	NA	NA	NA	NA	NA	NA	NA	NA	NA	NA	NA	NA
P30285	Cdk4	NA	24667.3	67698	NA	NA	NA	61844.5	87963.7	87330.3	100599	144025	NA	NA	147370
P30412	Ppic	NA	NA	NA	NA	NA	NA	NA	NA	NA	NA	NA	NA	NA	NA
P30416	Fkbp4	9110000	9010000	11400000	11600000	11400000	11400000	11900000	8900000	9840000	8110000	7770000	7770000	8360000	8040000
P30681	Hmgb2	1920000	1890000	1520000	1910000	1790000	2000000	1850000	2100000	1870000	2260000	2250000	1720000	2510000	2540000
P30933	Svs5	NA	NA	NA	NA	NA	NA	NA	NA	NA	NA	NA	290869	NA	52953.2
P30999	Ctnnd1	7030000	6870000	6670000	6970000	9130000	7080000	7830000	5450000	8970000	6720000	7830000	8310000	6420000	7350000
P31001	Des	1160000	2080000	1120000	2290000	2160000	2380000	2000000	1790000	2010000	2820000	1900000	1880000	2320000	2700000
P31230	Aimp1	15200000	13800000	12600000	16100000	11100000	13800000	12300000	12200000	11500000	12300000	11300000	12200000	13100000	10400000
P31266	Rbpj	111906	57606.1	26547.2	54049.1	NA	95812.3	93816.3	73101.1	114313	60664.3	97611.1	86366.7	55723.5	99026
P31428	Dpep1	304302	700316	429429	510051	373054	549412	156532	265636	192719	597795	269216	422753	615202	181678
P31649	Slc6a13	2130000	1980000	1590000	1150000	1400000	1180000	1520000	3870000	2240000	1440000	1070000	836672	1300000	1410000
P31651	Slc6a12	1310000	1930000	1740000	1340000	1950000	1250000	1540000	1550000	1330000	1470000	1500000	743040	702235	624586
P31725	S100a9	1390000	655762	791041	697627	1590000	1880000	1520000	948225	1120000	1770000	1990000	1930000	2280000	3940000
P31750	Akt1	150329	42364.7	384834	265023	490719	296278	333510	542012	NA	429412	345095	242745	214341	341636
P31786	Dbi	33800000	53600000	38700000	43300000	23100000	39200000	22900000	32600000	28700000	27600000	29400000	52400000	38800000	34900000
P31809	Ceacam1	1690000	2200000	1750000	2100000	1850000	1690000	1110000	1900000	1350000	1550000	1070000	1220000	1830000	1190000
P31938	Map2k1	2210000	2580000	1800000	2000000	3180000	1940000	2620000	1950000	1850000	2090000	2350000	1880000	1870000	2160000
P32020	Scp2	188000000	159000000	170000000	193000000	138000000	154000000	163000000	114000000	116000000	133000000	112000000	146000000	165000000	138000000
P32067	Ssb	4320000	4330000	4410000	3010000	4640000	3880000	5330000	4810000	5110000	5220000	4990000	4300000	4160000	4620000
P32233	Drg1	1790000	1200000	1740000	2050000	2730000	1850000	2640000	1480000	2030000	1520000	1610000	1650000	1400000	1190000
P32261	Serpinc1	30800000	25200000	18400000	22700000	20300000	23200000	19500000	23400000	21300000	20700000	17000000	22300000	20700000	26100000
P32507	Nectin2	3070000	1430000	1600000	2260000	1710000	2500000	2320000	2090000	2550000	1940000	1850000	2320000	2460000	2020000
P32848	Pvalb	NA	NA	NA	NA	NA	NA	232994	287523	NA	NA	NA	NA	NA	NA
P32883	Kras	10300000	7780000	8090000	9060000	9180000	10600000	9640000	8330000	8820000	9570000	9450000	12000000	12300000	14400000
P32921	Wars1	2120000	2630000	2810000	2680000	3560000	2230000	3010000	3010000	3070000	2860000	2750000	2770000	2500000	3840000
P33267	Cyp2f2	39800000	30200000	29500000	34600000	21000000	32000000	28300000	25500000	24200000	24000000	17800000	20700000	21600000	23800000
P33587	Proc	163396	179526	148882	214834	230652	314339	245281	298969	193201	139881	175172	271759	318573	219598
P33622	Apoc3	339115	103144	308074	99939	461391	330432	1180000	779912	685085	1110000	310124	982143	613063	546072
P34022	Ranbp1	5920000	6960000	4580000	5600000	4770000	5700000	5540000	7940000	5440000	5650000	6420000	7410000	7710000	8570000
P34152	Ptk2	905433	855612	762447	735130	583032	531920	596829	624466	549062	498417	635967	651398	595979	596416
P34884	Mif	12100000	7890000	17000000	11500000	11800000	9670000	16100000	21800000	23700000	22200000	31100000	27900000	27000000	26300000
P34914	Ephx2	23600000	23700000	28900000	23300000	29000000	24300000	37100000	26800000	25400000	27600000	28200000	23100000	23600000	23700000
P34927	Asgr1	16100000	14500000	18200000	12400000	18900000	14400000	13100000	16100000	16900000	13700000	13000000	8220000	11300000	10100000
P34928	Apoc1	2070000	2140000	1440000	2060000	1210000	1280000	944351	2250000	1620000	NA	2050000	2690000	2070000	2060000
P35123	Usp4	819013	888787	798048	781467	866656	747037	744004	630341	737156	599091	633037	406865	532620	520121
P35235	Ptpn11	3200000	2880000	3110000	3100000	3020000	2850000	3220000	2810000	3140000	2620000	2280000	2360000	1780000	2320000
P35278	Rab5c	1430000	1630000	1800000	1620000	1860000	1650000	2360000	1490000	1860000	1810000	1960000	1880000	1980000	2870000
P35279	Rab6a	635718	766251	352235	641956	727832	706610	899073	639053	637354	542281	689144	646918	719479	326951
P35282	Rab21	736608	600119	800536	777450	1500000	1050000	1650000	686336	1110000	870948	780755	827840	1050000	1060000
P35290	Rab24	281974	NA	204234	271553	257897	214113	171327	137564	248680	127602	59053.4	NA	NA	NA
P35292	Rab17	516616	NA	483719	345197	290808	417749	441982	194348	508593	464746	532661	449457	392688	453052
P35293	Rab18	1900000	1640000	1890000	1700000	2530000	1880000	2300000	2110000	1610000	2140000	1770000	1300000	1570000	1370000
P35295	Rab20	1430000	717524	NA	NA	NA	NA	618060	NA	2160000	3710000	1170000	1320000	1570000	NA
P35330	Icam2	588188	765233	121610	656479	1690000	847250	907936	342719	991989	584549	642170	1030000	673306	1200000
P35441	Thbs1	1050000	1170000	852236	1210000	1310000	1420000	1420000	2180000	1020000	1660000	1120000	1710000	1430000	2340000
P35486	Pdha1	16100000	12700000	14200000	12400000	17400000	14500000	14700000	15200000	19000000	17900000	16400000	17400000	14700000	16300000
P35492	Hal	10300000	8560000	15900000	9120000	20600000	11300000	18100000	12200000	22600000	16000000	13700000	10800000	9300000	11300000
P35505	Fah	79300000	86800000	107000000	89300000	92500000	77500000	114000000	87900000	114000000	113000000	118000000	70400000	80900000	76400000
P35550	Fbl	4380000	4440000	4860000	4280000	4650000	4470000	5340000	5480000	5450000	5960000	5410000	4690000	5130000	6610000
P35564	Canx	12600000	10900000	9910000	12600000	11700000	12000000	12100000	8530000	9950000	9850000	7510000	5180000	8270000	7680000
P35569	Irs1	1030000	1550000	609145	751796	844538	667144	252977	741573	297011	480356	631849	586486	622101	411505
P35576	G6pc1	NA	NA	308066	NA	565206	411491	233640	NA	NA	129344	NA	NA	NA	NA
P35582;P35584	Foxa1;Foxa3	208160	211565	157905	187351	163369	177310	NA	NA	NA	113886	189872	130720	118773	91563.7
P35585	Ap1m1	2530000	1720000	2270000	2230000	2370000	2730000	2320000	2400000	2320000	1950000	1850000	2240000	2140000	2520000
P35601	Rfc1	519199	760412	452583	511826	181162	310983	348138	276370	414927	276039	323923	233427	385521	293130
P35689	Ercc5	177876	313845	NA	342594	271179	271221	229790	417048	160107	254706	NA	NA	308440	NA
P35700	Prdx1	115000000	144000000	151000000	146000000	94200000	106000000	115000000	122000000	108000000	138000000	138000000	136000000	141000000	137000000
P35762	Cd81	796447	830744	NA	1100000	659516	933705	448297	149627	189740	405772	56554.7	48134.8	NA	NA
P35821	Ptpn1	921836	919881	1090000	703948	1200000	907911	913409	756685	619630	852666	1250000	930355	970991	1160000
P35822	Ptprk	387194	577302	289721	326976	372225	394463	472056	365510	298646	264808	252297	411189	361690	473540
P35831	Ptpn12	784524	689156	553516	526985	489114	515164	475823	546967	567924	523065	512084	722249	635589	554768
P35917	Flt4	265932	405004	NA	238362	408209	543270	848176	NA	662164	178168	NA	NA	494607	662828
P35922	Fmr1	NA	NA	186214	659286	786457	311533	206451	244618	213776	282730	349566	432374	161750	314308
P35951	Ldlr	628841	882303	670981	642110	630753	722687	871155	627629	692418	637146	444999	522786	833507	598622
P35979	Rpl12	17800000	19100000	26600000	19400000	16000000	15900000	18000000	13900000	16800000	25400000	29400000	26000000	21400000	16600000
P35980	Rpl18	181000000	154000000	183000000	159000000	89700000	194000000	162000000	60200000	108000000	138000000	80100000	198000000	220000000	186000000
P36371	Tap2	159301	264511	74245.6	NA	198802	159397	271631	NA	144995	152605	NA	107320	102338	159445
P36536	Sar1a	NA	NA	NA	NA	NA	NA	96432.8	NA	103990	86904.2	NA	NA	NA	81305.9
P36552	Cpox	11200000	12500000	11900000	11300000	14600000	14900000	16400000	13700000	16500000	14000000	17100000	15000000	15600000	13500000
P36916	Gnl1	1230000	1790000	1400000	1570000	2280000	1660000	1740000	1500000	1990000	1750000	1440000	1220000	1460000	1550000
P36993	Ppm1b	4090000	5060000	4240000	4460000	5370000	5350000	5390000	4660000	5660000	4980000	3640000	4530000	5110000	5160000
P37040	Por	16900000	13500000	18300000	17800000	21200000	16300000	20100000	18800000	18800000	17000000	15800000	12300000	15700000	16100000
P37804	Tagln	NA	NA	242571	385329	NA	NA	NA	NA	NA	338220	467335	429365	409479	NA
P38060	Hmgcl	2190000	2020000	3050000	2410000	3850000	2090000	4720000	4730000	4510000	6700000	6790000	4060000	3680000	3910000
P38647	Hspa9	192000000	179000000	172000000	180000000	184000000	174000000	234000000	219000000	247000000	228000000	237000000	216000000	234000000	238000000
P39039	Mbl1	2620000	1690000	3700000	2270000	1730000	3780000	5190000	2160000	4090000	4170000	3220000	4580000	3650000	4260000
P39053	Dnm1	840067	860945	NA	936666	821797	1190000	1800000	1650000	2060000	1360000	765015	781813	968709	NA
P39054	Dnm2	2880000	2650000	2960000	3240000	3490000	3250000	3390000	3170000	3780000	4100000	3850000	3460000	3230000	2760000
P39061	Col18a1	5130000	4520000	5610000	4430000	5390000	5020000	5690000	5600000	5850000	6280000	5690000	5670000	6320000	6500000
P39098	Man1a2	2960000	2190000	1530000	2400000	1730000	1740000	1090000	2250000	2180000	1800000	NA	1640000	2400000	1970000
P39447	Tjp1	3550000	4180000	3110000	3580000	4030000	3390000	3390000	3460000	4010000	3930000	3310000	3300000	3670000	3380000
P39655	Alox12	NA	NA	NA	NA	NA	NA	NA	203988	NA	NA	NA	NA	NA	17571.9
P39688	Fyn	237994	400640	NA	398948	NA	278978	256156	430370	422092	637584	433743	NA	430607	541124
P39749	Fen1	720600	374188	903659	505371	657890	698506	435620	631148	731547	608780	756324	885350	590437	700760
P39876	Timp3	NA	NA	NA	NA	95910.7	79249.3	85145.1	160988	104790	118317	209455	177901	118098	240371
P40124	Cap1	6910000	5670000	7010000	6480000	7590000	6250000	6910000	7900000	7830000	6450000	8690000	6880000	6430000	8620000
P40142	Tkt	51100000	56400000	62500000	59700000	58600000	53100000	66900000	61200000	66000000	65400000	54800000	64400000	65100000	63300000
P40237	Cd82	418745	NA	155683	177922	267343	510461	373584	341820	276021	NA	NA	120307	NA	NA
P40336	Vps26a	1550000	3140000	2110000	2250000	2030000	2110000	1660000	1800000	923183	1630000	1540000	1790000	1510000	1250000
P40630	Tfam	11100000	9830000	8530000	8820000	7770000	9750000	8520000	8200000	10800000	10900000	11100000	13900000	13000000	9320000
P40694	Ighmbp2	360495	830315	218669	379313	266111	357070	102276	285416	230051	229089	284207	349931	NA	270560
P40936	Inmt	4650000	5090000	4920000	9330000	5350000	6170000	4690000	2330000	3850000	4760000	3150000	4660000	3530000	3230000
P41105	Rpl28	49300000	49900000	39600000	55500000	25900000	45000000	29700000	40500000	35200000	34400000	29500000	42900000	63300000	45700000
P41216	Acsl1	46800000	41100000	44800000	42100000	47300000	53700000	50700000	40600000	40500000	37200000	29000000	31400000	39600000	34100000
P41230	Kdm5c	79804.9	163998	241855	149366	246736	195505	183586	NA	NA	NA	NA	169621	NA	268520
P41233	Abca1	122660	106668	120829	162431	165200	143492	NA	125240	NA	NA	NA	NA	128197	77457.3
P41241	Csk	1630000	1360000	1950000	1590000	2210000	1430000	1900000	1700000	1500000	1690000	1810000	2410000	1760000	1870000
P41317	Mbl2	3120000	3010000	2950000	3070000	2570000	3010000	2840000	4270000	2310000	3000000	2480000	2730000	2830000	3440000
P42125	Eci1	25200000	19400000	29900000	19100000	29400000	24700000	40400000	48800000	45700000	62300000	64300000	60400000	56900000	49700000
P42128	Foxk1	601065	487340	482199	479060	553598	488528	369342	418494	425857	455678	557207	640704	511849	423504
P42208	Septin2	2380000	2420000	2360000	2190000	3110000	2250000	2460000	3680000	2660000	3260000	3300000	2010000	2010000	2720000
P42209	Septin1	460430	336828	704106	596805	411107	622012	434084	274267	293967	671329	1020000	385749	361628	1080000
P42225	Stat1	1060000	752376	1240000	1430000	1630000	1200000	1350000	799918	832857	1110000	725326	679414	896307	1770000
P42227	Stat3	877322	912406	1030000	827599	1190000	944564	1030000	904700	862269	839859	863843	561557	771701	860301
P42230	Stat5a	NA	NA	NA	NA	NA	72063	NA	NA	NA	NA	NA	NA	21871	NA
P42232	Stat5b	274165	473867	336571	556409	629997	484132	532446	436949	572737	364806	525048	390313	497322	521758
P42567	Eps15	788767	770262	723730	780589	734153	846649	1040000	1200000	756816	980009	870742	736013	659625	687587
P42669	Pura	3910000	3120000	3250000	2890000	3540000	3360000	3710000	3400000	3390000	3810000	3540000	3500000	3960000	3900000
P42703	Lifr	1200000	790737	839100	1010000	1250000	1390000	1310000	788630	682561	623679	566701	800390	783985	889935
P42859	Htt	662876	NA	271757	326969	505722	255876	328194	281110	335347	175902	216773	145321	327787	239562
P42925	Pxmp2	345598	332255	NA	935347	465669	778897	256942	406726	448300	214181	426418	NA	852626	NA
P42932	Cct8	7650000	8020000	8770000	9510000	12100000	9090000	10100000	9390000	8110000	8390000	8610000	6830000	8070000	8430000
P43006	Slc1a2	NA	NA	NA	NA	NA	NA	NA	NA	NA	NA	NA	NA	NA	NA
P43024	Cox6a1	NA	NA	464721	NA	NA	245184	343848	NA	NA	492412	568962	600973	1210000	988390
P43025	Clec3b	NA	NA	NA	NA	NA	NA	177881	146703	180590	NA	344988	NA	298758	130655
P43247	Msh2	249634	NA	307578	135572	404059	304007	321091	272077	303989	350436	440985	447638	402091	448695
P43274	H1-4	219000000	354000000	146000000	172000000	142000000	194000000	163000000	226000000	214000000	204000000	202000000	213000000	265000000	193000000
P43275	H1-1	6230000	2020000	3780000	6080000	4630000	4060000	5260000	3700000	3760000	4330000	4330000	4690000	6050000	7250000
P43276	H1-5	30800000	57600000	23300000	34200000	20100000	32700000	22400000	35600000	24200000	32400000	30000000	33700000	45000000	35700000
P43277	H1-3	183000000	281000000	119000000	197000000	88400000	168000000	127000000	191000000	125000000	166000000	186000000	191000000	213000000	224000000
P43406	Itgav	697984	589234	475143	573952	868864	770568	715872	891580	727726	674201	749882	514082	629871	520204
P43883	Plin2	5170000	4150000	9200000	5220000	10200000	6260000	8140000	7390000	5470000	7540000	6460000	7450000	5450000	7590000
P45376	Akr1b1	1290000	1500000	1640000	1520000	1610000	1530000	1950000	2170000	1780000	2240000	2360000	1980000	2130000	2860000
P45377	Akr1b8	712463	1290000	1000000	824008	645848	572559	800397	1060000	887157	881511	1070000	1000000	1210000	769782
P45591	Cfl2	1050000	1320000	1100000	1210000	947090	762383	890310	1080000	1080000	1280000	1140000	1340000	1220000	1340000
P45700	Man1a1	3660000	2880000	3000000	2810000	4200000	3650000	3580000	3440000	3550000	2900000	3590000	2510000	3330000	3440000
P45878	Fkbp2	17600000	17800000	20900000	21200000	11300000	14700000	13900000	15400000	12900000	15400000	14900000	17600000	14000000	14400000
P45952	Acadm	30800000	27900000	49300000	38900000	26700000	33700000	30700000	34100000	35000000	42600000	40900000	48300000	41300000	38700000
P46061	Rangap1	990854	1190000	809008	967250	786739	871822	923141	830968	1080000	837540	630439	842118	955468	723494
P46062	Sipa1	607476	706565	532330	731537	897548	610736	626492	579463	861706	498998	745884	494788	639430	1010000
P46412	Gpx3	NA	665125	166458	136423	257225	232916	222771	498398	279508	373557	471500	366824	385438	387374
P46414	Cdkn1b	927544	804096	886331	1010000	579634	753135	373740	529718	543765	581923	376431	701948	555739	442462
P46425	Gstp2	661972	NA	495767	159424	322749	219752	479629	839550	687418	464999	731061	410222	333621	376046
P46460	Nsf	1830000	1340000	2390000	1750000	2210000	1960000	1720000	2280000	2030000	2350000	2580000	2120000	1760000	2590000
P46467	Vps4b	2460000	3320000	2550000	3580000	3660000	3140000	4250000	3000000	3130000	3660000	2580000	3150000	2930000	2570000
P46471	Psmc2	9630000	7400000	11400000	9620000	16300000	12600000	14400000	12600000	12100000	12300000	14200000	11700000	9150000	11700000
P46638	Rab11b	913152	710459	1330000	1120000	989854	1030000	1040000	1010000	1040000	1310000	1420000	1040000	1080000	1060000
P46656	Fdx1	2430000	1720000	2580000	2890000	1550000	3360000	2890000	2380000	1890000	3390000	2760000	4450000	3330000	4150000
P46664	Adss2	3530000	2620000	3960000	3940000	3340000	3720000	3290000	2850000	3150000	3040000	3520000	2810000	2980000	3340000
P46718	Pdcd2	728887	NA	648153	1010000	912309	754283	1090000	667591	546301	722632	936175	848452	997082	750718
P46735	Myo1b	5290000	4130000	5400000	4780000	6110000	5680000	6380000	5840000	6560000	5880000	4890000	5280000	5180000	5310000
P46737	Brcc3	526517	466272	571529	726544	693712	613723	409531	545754	373855	436758	344156	361167	460451	382436
P46935	Nedd4	2580000	2600000	2010000	2210000	2520000	2610000	2460000	3090000	2280000	2660000	2130000	2470000	2590000	2560000
P46938	Yap1	NA	219965	530236	285631	183692	NA	NA	NA	114575	145296	175434	NA	NA	NA
P46978	Stt3a	3970000	5010000	2520000	4440000	3940000	4740000	2860000	1990000	2080000	2090000	1800000	1350000	2280000	1490000
P47199	Cryz	22700000	15900000	28000000	16900000	35200000	23300000	32000000	33500000	34800000	28100000	32100000	26300000	30700000	28700000
P47738	Aldh2	181000000	127000000	190000000	172000000	179000000	174000000	212000000	197000000	206000000	197000000	176000000	209000000	203000000	215000000
P47740	Aldh3a2	17200000	15100000	19400000	18400000	26700000	18800000	22600000	19800000	16100000	18500000	12900000	9510000	15900000	15000000
P47753	Capza1	1620000	1230000	2380000	1370000	1880000	1640000	2120000	2040000	2040000	2030000	1570000	1700000	1840000	2640000
P47754	Capza2	7180000	6280000	10600000	7250000	10400000	7720000	11000000	9860000	10400000	10300000	9060000	5920000	8370000	8860000
P47757	Capzb	6110000	5030000	6010000	4690000	7510000	6980000	8470000	8310000	7130000	7390000	5900000	6000000	5540000	6970000
P47758	Srprb	418667	501394	608199	497086	670152	651866	677542	632379	681613	579464	492457	330428	393286	423286
P47791	Gsr	5330000	3700000	5040000	4980000	6630000	5130000	6030000	6220000	6500000	4930000	5100000	4510000	5090000	6870000
P47802	Mtx1	1220000	1070000	1220000	1640000	1060000	1570000	1380000	1140000	1290000	955659	1150000	810603	1260000	991755
P47809	Map2k4	1630000	1230000	1440000	1630000	1090000	1390000	1050000	1100000	1070000	1170000	922367	1070000	1140000	1200000
P47811	Mapk14	1110000	1130000	1570000	1640000	990616	1390000	933318	1330000	1000000	1330000	1140000	983516	864293	609832
P47856	Gfpt1	1590000	1440000	1430000	1580000	1790000	1730000	1350000	1090000	1610000	1060000	1560000	966261	1280000	1080000
P47857	Pfkm	2840000	2380000	2190000	2570000	3310000	3180000	3240000	3110000	2980000	2160000	2400000	2810000	2670000	2710000
P47877	Igfbp2	1460000	1830000	1130000	1650000	1200000	995445	894458	3320000	3250000	2890000	2180000	2740000	1670000	2160000
P47878	Igfbp3	1170000	1110000	894202	794941	555862	1400000	1210000	655502	731353	826426	850428	905367	1000000	988819
P47879	Igfbp4	2750000	4110000	3260000	3700000	2210000	3470000	2040000	2350000	2660000	2000000	2080000	4120000	2440000	4060000
P47911	Rpl6	116000000	108000000	95400000	94100000	74300000	143000000	108000000	78300000	74100000	68200000	69200000	128000000	101000000	125000000
P47915	Rpl29	918127	1430000	586110	504679	399575	727311	956283	411489	478750	429066	467502	622285	531355	421319
P47934	Crat	1830000	1910000	2730000	1580000	3990000	2220000	3000000	2660000	2070000	2570000	2820000	2430000	2220000	2440000
P47941	Crkl	2250000	3050000	2700000	2380000	2040000	2040000	1770000	2090000	1490000	2040000	1930000	2280000	1940000	1860000
P47955	Rplp1	1510000	NA	2310000	659325	5560000	902018	6330000	5850000	3280000	5020000	3840000	4390000	4990000	5220000
P47962	Rpl5	15500000	12400000	11500000	10400000	14600000	14700000	19200000	15300000	16700000	15200000	11800000	12000000	15000000	15600000
P47963	Rpl13	250000000	327000000	245000000	297000000	169000000	302000000	212000000	213000000	207000000	213000000	176000000	282000000	310000000	235000000
P47964	Rpl36	31600000	37300000	27000000	34500000	7000000	28900000	11300000	8420000	9970000	12300000	7950000	25800000	22800000	18000000
P47968	Rpia	134290	NA	266605	NA	323792	220925	281465	589322	NA	154930	301815	532622	315695	201345
P48024	Eif1	723309	589748	814189	584060	642849	729681	834581	951628	830298	1090000	938326	889776	965670	497783
P48025	Syk	NA	NA	NA	13100000	338498	NA	468690	NA	NA	740678	NA	NA	NA	345404
P48036	Anxa5	7970000	9640000	12800000	12500000	10200000	7470000	7370000	7690000	9410000	10800000	11600000	9320000	10800000	11000000
P48193	Epb41	2670000	2590000	2280000	2390000	2740000	2570000	2480000	4200000	2810000	2730000	3700000	2820000	2690000	3440000
P48377	Rfx1	158513	129652	138011	NA	221266	NA	68193	143142	123664	97570.8	169993	NA	106468	NA
P48410	Abcd1	634005	807335	644811	920205	742158	689486	495307	119506	185433	776724	NA	778513	734993	785447
P48428	Tbca	386307	553439	620420	817593	291205	603464	302111	204228	286841	58393.9	204651	290843	183189	206856
P48437	Prox1	1530000	1360000	1390000	1390000	872806	1870000	876939	1070000	924106	1490000	1230000	1070000	1220000	1080000
P48453	Ppp3cb	NA	NA	NA	NA	NA	NA	NA	113136	NA	168145	306593	95406.4	185028	NA
P48678	Lmna	17700000	15800000	15700000	18000000	20400000	20100000	18800000	16900000	20000000	18200000	17200000	24300000	21600000	20600000
P48722	Hspa4l	3340000	2850000	3310000	3220000	3320000	3630000	4060000	4020000	3490000	3590000	3240000	3490000	3230000	3400000
P48758	Cbr1	12700000	11700000	18700000	15300000	13600000	11600000	12200000	13400000	16100000	17200000	17700000	16800000	15700000	15900000
P48760	Fpgs	570268	NA	583946	NA	351644	NA	382583	NA	NA	257745	NA	NA	24600	NA
P48771	Cox7a2	809070	812767	834611	1380000	837934	918957	753588	1470000	1190000	1110000	1200000	769931	1050000	881910
P48776	Tdo2	3250000	3390000	3100000	4160000	3230000	3590000	4370000	2850000	2330000	2980000	2690000	1950000	2600000	2540000
P48962	Slc25a4	2250000	2110000	1310000	1700000	1650000	1460000	1410000	1140000	1170000	1440000	942133	428550	1040000	1160000
P49070	Camlg	469806	NA	244204	404180	242187	405699	520789	311442	257814	463661	290733	443690	376257	416466
P49138	Mapkapk2	1300000	822469	1130000	953084	1180000	1040000	928939	1080000	527250	889368	913629	1190000	765471	951578
P49182	Serpind1	1760000	1710000	1290000	1690000	1700000	1780000	1570000	2030000	1850000	1460000	1300000	2590000	1850000	1730000
P49222	Epb42	407920	524044	375475	462816	682295	325245	437274	1050000	421814	342288	472960	659790	374785	781176
P49290	Epx	441378	757096	517366	911055	668043	716501	437353	279138	292612	654945	511518	632823	692658	635720
P49312	Hnrnpa1	1390000	1310000	1660000	1670000	2210000	1790000	2040000	2580000	2980000	2050000	2430000	1880000	2070000	2640000
P49429	Hpd	83700000	62300000	115000000	82400000	160000000	110000000	170000000	117000000	126000000	123000000	129000000	108000000	112000000	118000000
P49442	Inpp1	438893	449539	472286	547453	457098	314724	557593	466531	555346	422485	444262	365551	366873	317365
P49443	Ppm1a	2850000	2320000	3140000	2730000	4400000	3060000	4180000	2850000	3440000	3400000	2740000	2590000	2940000	2790000
P49586	Pcyt1a	3490000	3670000	4770000	4710000	4170000	4510000	4470000	4510000	7430000	5050000	4690000	5590000	5680000	6570000
P49615	Cdk5	616349	553223	398966	669704	625251	631153	782169	377397	778271	1050000	783318	818425	975007	581388
P49698	Hnf4a	340821	449845	375704	456634	383138	372141	241996	418111	343855	385173	407158	278202	340721	323015
P49710	Hcls1	1580000	1770000	1210000	1900000	881064	900030	755598	715430	764752	1170000	738240	1050000	875276	1540000
P49717	Mcm4	NA	NA	NA	NA	97360.6	45238	NA	114048	NA	NA	170415	NA	NA	341010
P49718	Mcm5	NA	NA	NA	NA	NA	80330.9	345530	402163	215505	361665	82813.3	NA	88933.1	321532
P49722	Psma2	1890000	1070000	2380000	1480000	2630000	1680000	2970000	2220000	2830000	3060000	3180000	1860000	2200000	2590000
P49769	Psen1	NA	NA	157947	168690	172174	259365	214033	114655	NA	195113	NA	NA	161515	152548
P49813	Tmod1	NA	85963.5	162736	NA	NA	60783.4	NA	413263	NA	145153	347020	440723	53000.8	373500
P49935	Ctsh	2270000	1900000	2580000	2270000	1810000	1730000	2210000	2910000	2470000	2530000	1840000	2230000	2390000	2360000
P49962	Srp9	549190	1230000	604810	267972	604547	590913	526408	490091	406276	462371	611279	799756	542967	699391
P50096	Impdh1	NA	NA	178667	NA	703150	57737	596323	320648	757850	402343	347574	142463	238989	254308
P50136	Bckdha	12000000	13400000	9380000	11300000	13500000	10500000	12900000	12300000	16900000	14900000	13900000	13100000	12900000	12200000
P50171	Hsd17b8	12400000	8940000	11900000	13500000	11400000	13000000	14700000	12400000	12700000	14700000	17300000	16600000	20000000	17700000
P50172	Hsd11b1	11300000	8290000	12100000	9440000	14000000	14500000	13500000	11100000	12900000	10400000	8180000	8270000	12900000	11800000
P50247	Ahcy	144000000	73300000	186000000	138000000	161000000	157000000	204000000	143000000	149000000	171000000	156000000	164000000	181000000	133000000
P50285	Fmo1	12400000	16300000	11600000	16500000	15000000	16500000	13800000	10800000	11700000	9170000	6050000	6640000	9200000	9860000
P50295	Nat2	1500000	1540000	2170000	2070000	1890000	1980000	2320000	1500000	1480000	1720000	2540000	1260000	2220000	1460000
P50396	Gdi1	3630000	3320000	3250000	4330000	3760000	3670000	3700000	3450000	2350000	3110000	2220000	2380000	2110000	2250000
P50427	Sts	17000000	13500000	12200000	14200000	18500000	16200000	16000000	16900000	18500000	19500000	15500000	16700000	16200000	18400000
P50428	Arsa	186695	238619	120357	137309	194449	239691	248193	452894	130346	280866	384336	283748	182814	207392
P50429	Arsb	11000000	9480000	7420000	5920000	5550000	7420000	8070000	13900000	12600000	11800000	8740000	11300000	13300000	11700000
P50431	Shmt1	9700000	8660000	13400000	9190000	19600000	10900000	17100000	11800000	13000000	12600000	14600000	11400000	8980000	10500000
P50446	Krt6a	658683	135227	495715	357471	676384	651378	428099	479798	633439	7260000	621266	1350000	987564	557921
P50462	Csrp3	2420000	3960000	2130000	2290000	2780000	2190000	1160000	1290000	1010000	898257	1210000	1180000	1380000	1040000
P50516	Atp6v1a	4680000	4330000	3810000	4050000	4020000	3990000	3820000	4170000	3200000	4420000	3820000	4430000	2900000	4230000
P50518	Atp6v1e1	382056	690941	661706	426764	426915	260117	498119	288262	578551	437439	765454	701401	523794	628539
P50543	S100a11	NA	NA	NA	NA	NA	NA	NA	NA	NA	NA	NA	NA	NA	NA
P50544	Acadvl	11600000	10800000	18100000	11700000	18100000	11700000	17900000	22300000	23400000	25200000	23900000	22400000	23300000	21400000
P50580	Pa2g4	8660000	7070000	7500000	7340000	11700000	9100000	12900000	9740000	10700000	8180000	8770000	8290000	8280000	7140000
P50608	Fmod	621196	932874	734581	768230	302221	775516	328795	367633	510023	482262	466573	537969	610896	431171
P51125	Cast	2530000	1990000	2250000	1570000	3150000	1890000	2710000	2480000	2890000	2860000	2260000	2380000	3120000	1960000
P51141	Dvl1	542163	408761	272903	214607	331808	157553	188756	312222	208863	176251	287520	269611	187274	538135
P51150	Rab7a	10100000	8720000	6610000	8030000	7300000	7450000	6030000	6630000	6300000	6970000	6060000	5500000	6610000	5440000
P51163	Uros	NA	NA	415525	129071	54390.6	147824	189874	233407	237302	211196	424080	414905	250555	523183
P51174	Acadl	37300000	31800000	47800000	45500000	40200000	40400000	40900000	51700000	48100000	58900000	59400000	55300000	49400000	59900000
P51175	Ppox	882320	1070000	1150000	790846	1240000	769709	1360000	1520000	1480000	1500000	2030000	1630000	1180000	1310000
P51410	Rpl9	3840000	3440000	4150000	4620000	5190000	3110000	5500000	5320000	6280000	5400000	5010000	3990000	2910000	2760000
P51432	Plcb3	1180000	1020000	1290000	944090	1470000	1190000	1310000	1180000	1280000	1220000	1180000	1350000	1110000	1300000
P51437	Camp	571822	200988	286169	707625	472756	801935	238520	NA	319299	305034	666514	484431	439159	762647
P51655	Gpc4	245897	269355	231009	228406	398900	314561	334701	209038	283849	310244	194458	253441	385212	417281
P51658	Hsd17b2	4780000	4840000	5780000	5750000	4010000	6810000	6260000	4610000	4350000	4890000	3140000	2940000	3920000	4390000
P51660	Hsd17b4	38800000	29200000	50600000	35800000	69000000	44900000	67700000	55600000	50100000	42800000	39800000	35000000	35600000	46600000
P51830	Adcy9	281334	367793	381367	209813	365672	304401	433329	237654	411574	357239	381448	282747	283166	261739
P51855	Gss	4470000	2440000	6220000	4430000	6010000	3920000	7480000	6950000	6750000	8660000	14000000	7220000	7250000	7450000
P51859	Hdgf	9890000	8750000	5680000	7410000	7900000	10700000	11300000	10200000	8740000	12000000	9470000	9730000	8380000	10100000
P51863	Atp6v0d1	1590000	1240000	1130000	2100000	713396	1560000	1200000	1950000	1370000	1010000	1580000	2120000	2350000	1650000
P51880	Fabp7	439653	287996	820024	381770	323499	310971	651036	405018	375649	251533	348598	352069	282305	452454
P51881	Slc25a5	95600000	52200000	86700000	68300000	96600000	96300000	105000000	98000000	116000000	92400000	73600000	78000000	97100000	106000000
P51885	Lum	3090000	6630000	4420000	5990000	6430000	6530000	3990000	4280000	4560000	6260000	5300000	5580000	6680000	6180000
P51910	Apod	411575	261167	NA	354745	321294	264461	430187	479158	511040	363156	332889	260194	410690	245600
P51949	Mnat1	NA	168194	149933	NA	309202	416479	434959	153475	200265	136067	267467	394227	308787	279750
P51954	Nek1	118377	NA	118573	NA	524085	164776	371123	545374	701579	550788	457133	191900	334193	315869
P52019	Sqle	99692.8	NA	74974.9	NA	155383	NA	142157	137549	NA	NA	NA	NA	120552	59663.6
P52196	Tst	49500000	54700000	69300000	53600000	76300000	51600000	97500000	70400000	78100000	88100000	94400000	73500000	50900000	66800000
P52293	Kpna2	685176	684182	927135	815018	889828	955372	1010000	1260000	658647	964849	1040000	815199	788507	805464
P52332	Jak1	1220000	2640000	1370000	2160000	1340000	1300000	1210000	1110000	1370000	1380000	837271	1240000	1650000	1600000
P52430	Pon1	16500000	16900000	20000000	19600000	12400000	15400000	11400000	14400000	12100000	10900000	11000000	11000000	13700000	10300000
P52431	Pold1	NA	160237	132801	211863	265808	179359	231393	114236	223500	194098	149921	138136	192253	335424
P52479	Usp10	4070000	3310000	3150000	2750000	4390000	3060000	3320000	3950000	3970000	3500000	3050000	3490000	3420000	3480000
P52480	Pkm	6300000	5390000	7830000	8550000	9300000	6630000	9190000	7820000	7620000	7130000	7920000	6710000	5050000	10700000
P52503	Ndufs6	1890000	4730000	561407	1790000	642850	1570000	856231	606543	785266	697078	702430	1060000	680838	1420000
P52623	Uck1	730918	432238	969171	545740	752865	490060	718239	537767	437756	488404	618727	604307	364142	417613
P52633	Stat6	NA	NA	NA	NA	NA	NA	131913	129435	NA	142503	153015	NA	219404	144774
P52760	Rida	29300000	51300000	34700000	40900000	23700000	29700000	34400000	28700000	33400000	32200000	34100000	48400000	43600000	38200000
P52792	Gck	4650000	3570000	5240000	3630000	6430000	5250000	10500000	5650000	5480000	6790000	6680000	5820000	5100000	4410000
P52795	Efnb1	1360000	1840000	1270000	736788	771528	1470000	926572	548623	992102	848523	620573	1080000	1180000	1100000
P52825	Cpt2	39600000	27200000	43900000	37900000	46700000	40700000	42900000	55600000	61400000	53600000	55100000	46900000	42300000	54800000
P52840	Sult1a1	3620000	4320000	6260000	3750000	6180000	4250000	6130000	5760000	6970000	7300000	8010000	5040000	4740000	4820000
P52843	Sult2a1	1560000	4180000	NA	NA	NA	NA	NA	NA	161995	NA	NA	4490000	NA	2650000
P53026	Rpl10a	17500000	11700000	31500000	16900000	21900000	17000000	23700000	17100000	22200000	19600000	22300000	24300000	18500000	23600000
P53395	Dbt	10200000	5500000	10300000	7570000	10500000	9790000	12100000	17800000	12200000	13700000	14100000	11100000	10700000	10600000
P53564	Cux1	681220	414110	623299	613458	447136	572178	454280	NA	432208	508419	401582	669734	464671	549934
P53566	Cebpa	453661	880782	937764	723043	549460	538356	348875	615534	385974	754766	682337	796159	683501	298348
P53569	Cebpz	477191	NA	374583	500830	409561	457607	594050	310804	311441	455223	360894	308311	448428	331290
P53612	Rabggtb	1090000	1010000	855614	963271	829007	987857	842244	837126	576038	762255	707119	462897	788445	476503
P53657	Pklr	32400000	23500000	26100000	26000000	50000000	31300000	48900000	27500000	37400000	27400000	21400000	23200000	29900000	27700000
P53702	Hccs	298585	420460	341708	404009	160377	420351	401671	363080	342599	384366	352102	278566	255225	259023
P53762	Arnt	229603	321499	24049.1	172796	199008	146225	166665	98493.9	129959	NA	141626	58003.2	NA	NA
P53798	Fdft1	343649	377519	275784	284096	290448	423630	336293	NA	279417	169657	NA	211189	183873	NA
P53808	Pctp	2670000	3610000	4480000	3960000	4800000	3860000	4150000	3040000	3520000	3720000	3660000	3470000	1740000	2110000
P53810	Pitpna	1880000	971830	1740000	1500000	1910000	1150000	1880000	1940000	1910000	2050000	1850000	852550	955543	1670000
P53811	Pitpnb	2610000	1410000	2400000	2010000	3250000	2410000	2430000	2820000	2490000	2280000	2170000	2280000	2310000	2240000
P53986	Slc16a1	66515.1	138771	95869.4	126845	144938	92069.6	NA	77071.9	73033.3	56249.2	58767.5	56245.8	106655	91509
P53994	Rab2a	2340000	1860000	2360000	2090000	2160000	2440000	2650000	2760000	2010000	2370000	2390000	2320000	2420000	2330000
P53995	Anapc1	61995.6	135767	79719.8	100063	91351.9	121390	72209.3	72689.5	NA	80444.1	82736.8	84152.1	90002.2	NA
P53996	Cnbp	2400000	2150000	1940000	1510000	1380000	1450000	954120	957680	1380000	919098	1240000	1340000	1450000	847267
P54071	Idh2	11500000	9180000	14000000	11700000	18100000	11700000	20000000	25400000	28300000	25500000	31400000	20100000	20100000	21500000
P54103	Dnajc2	3420000	3530000	2300000	2370000	2190000	2470000	2240000	2890000	1880000	1600000	1940000	1810000	2300000	1820000
P54116	Stom	866675	893746	843774	693877	1530000	1270000	1570000	2120000	1250000	1060000	1680000	1410000	1490000	2060000
P54227	Stmn1	3240000	4220000	1890000	2700000	1400000	1940000	1280000	2990000	1360000	1760000	1570000	1940000	1550000	2710000
P54254	Atxn1	945272	1140000	874901	529202	624268	725471	414671	579966	448989	456837	700638	828152	718715	551496
P54276	Msh6	839449	726882	972799	934365	698644	1390000	1100000	693766	985707	891090	1470000	1110000	856303	1140000
P54310	Lipe	433799	570060	511765	782127	654498	609339	587263	664755	489312	584721	532572	1580000	960004	639291
P54726	Rad23a	283121	521523	530666	331298	210644	367674	468019	263173	NA	463945	447325	641329	606129	297689
P54728	Rad23b	983875	1150000	1580000	1170000	1180000	867428	1270000	1480000	1280000	1340000	1520000	979239	1280000	941670
P54729	Nub1	376462	439470	485246	686895	854836	558079	810058	449470	700567	676684	461659	611105	429940	632689
P54731	Faf1	1240000	1040000	1270000	1150000	1230000	1200000	1180000	779821	1100000	820525	1290000	1190000	1020000	1180000
P54751	St3gal1	282573	254913	270776	416147	444868	392444	394730	NA	302408	285467	296859	176802	189527	343100
P54775	Psmc4	5080000	4050000	7830000	5940000	7700000	5480000	7980000	6170000	5520000	7410000	8120000	6030000	4130000	5730000
P54797	Tango2	945551	915416	967587	1170000	1180000	1110000	1140000	914856	1260000	1200000	1320000	1030000	919208	1230000
P54822	Adsl	1090000	706551	1570000	2010000	1560000	1270000	1520000	1840000	1270000	1710000	2130000	1660000	1770000	1440000
P54823	Ddx6	4710000	2980000	4300000	3430000	4040000	2940000	2400000	4680000	3800000	3790000	4180000	3700000	3760000	2820000
P54869	Hmgcs2	184000000	152000000	226000000	189000000	259000000	223000000	256000000	286000000	253000000	252000000	269000000	297000000	318000000	262000000
P54987	Acod1	NA	NA	NA	NA	NA	NA	NA	NA	NA	NA	NA	NA	NA	NA
P55012	Slc12a2	571113	477292	863983	1100000	491286	675635	NA	437717	877041	332529	603839	570254	738586	NA
P55050	Fabp2	6010000	5300000	6110000	6620000	6790000	7420000	6130000	3710000	3100000	5140000	3080000	5210000	6540000	5920000
P55065	Pltp	660375	NA	831925	509079	1010000	603545	696866	632374	495838	1220000	956254	1220000	917489	1100000
P55096	Abcd3	11200000	10300000	14800000	13600000	21600000	15800000	15600000	12800000	8860000	10400000	7510000	7000000	11300000	8460000
P55104	Inhbc	854956	1680000	1190000	579607	735238	1370000	902274	715473	695081	569123	436995	810314	982404	1050000
P55258	Rab8a	2460000	656476	2660000	2100000	4310000	2490000	2790000	3880000	3570000	2530000	2740000	3720000	3190000	3910000
P55264	Adk	25800000	27300000	31800000	23600000	34500000	29400000	30800000	23500000	29600000	25800000	18500000	19700000	21900000	19300000
P55284	Cdh5	200720	277332	NA	141436	NA	NA	NA	190233	180539	247213	124355	NA	NA	221787
P55292	Dsc2	269562	167398	345523	332190	588649	362136	520915	467261	369870	459297	411930	325671	489101	327939
P55302	Lrpap1	5870000	8590000	5390000	5330000	5090000	6470000	5600000	4650000	5830000	5830000	5200000	7550000	8510000	6740000
P55937	Golga3	639021	562747	759488	600616	756321	607674	896699	692152	753242	835215	891401	789353	891286	852225
P56135	Atp5mf	123000000	84000000	76700000	75600000	63200000	99900000	94000000	121000000	98200000	92800000	94600000	98700000	113000000	107000000
P56183	Rrp1	986995	1040000	608274	1240000	763270	1110000	715729	745264	774997	971840	824274	1000000	1190000	1050000
P56212	Arpp19	390244	341432	539505	433204	429710	280872	299359	390510	435499	321042	272721	282233	498274	314583
P56213	Gfer	25100000	30500000	17600000	25200000	12800000	17100000	12600000	22500000	20400000	15500000	16900000	17500000	19100000	17100000
P56375	Acyp2	NA	NA	NA	188404	246115	NA	191958	NA	NA	NA	NA	383405	294491	391886
P56376	Acyp1	1230000	991014	1200000	942236	1160000	824805	1270000	841203	1380000	992011	886306	1260000	1340000	1050000
P56379	Atp5mpl	432761	2220000	1420000	1400000	1380000	1530000	801887	1980000	897846	1330000	1060000	1660000	1040000	1420000
P56380	Nudt2	608220	565202	485246	536725	290555	228451	349731	439938	303372	192648	410018	436897	313778	302048
P56382	Atp5f1e	215617	570082	132243	109404	NA	180083	NA	NA	69194	160867	NA	341122	217243	189150
P56389	Cda	705849	749378	892922	821363	839869	633622	671272	829892	645344	957081	911049	965218	1260000	1040000
P56391	Cox6b1	32400000	37500000	22600000	28900000	15600000	23300000	21900000	27900000	24000000	27000000	22600000	36800000	31900000	24500000
P56395	Cyb5a	48100000	49600000	50400000	51900000	25900000	44000000	28800000	29100000	35600000	45200000	40300000	52000000	50000000	53700000
P56399	Usp5	6670000	9420000	6640000	8740000	6410000	6480000	6930000	5550000	6260000	6440000	5480000	6000000	6300000	5740000
P56400	Gp1bb	317112	NA	NA	118674	198510	225018	234269	721985	431082	574283	527513	968317	522539	858376
P56480	Atp5f1b	89200000	76300000	154000000	95500000	76100000	75500000	114000000	108000000	114000000	132000000	138000000	114000000	123000000	114000000
P56528	Cd38	1960000	1770000	1850000	1470000	1580000	2050000	1870000	2320000	1660000	1580000	1320000	946538	1360000	1490000
P56542	Dnase2	223069	NA	NA	NA	NA	197478	NA	272316	NA	260035	NA	186975	259745	219527
P56593	Cyp2a12	29400000	22200000	25700000	25800000	22600000	28200000	27100000	26500000	21300000	21500000	16900000	13800000	17600000	17500000
P56654	Cyp2c37	6860000	9190000	9810000	8870000	7410000	7880000	8190000	7530000	7280000	7420000	5510000	4150000	6340000	4630000
P56655	Cyp2c38	285731	323923	1230000	827142	1210000	483329	1950000	NA	NA	NA	NA	NA	1360000	317139
P56657	Cyp2c40	7610000	9510000	4390000	8350000	6640000	7060000	6810000	6220000	6300000	6020000	6140000	4180000	6080000	5060000
P56695	Wfs1	1580000	1590000	941360	1560000	1410000	2020000	1670000	902800	2030000	1020000	1450000	1080000	1470000	939271
P56812	Pdcd5	2000000	2480000	3480000	2450000	2020000	2000000	1960000	2130000	1830000	1580000	2790000	2540000	1870000	2020000
P56959	Fus	5590000	5920000	3380000	6790000	5390000	4900000	3900000	5780000	6410000	6190000	5680000	5230000	8680000	5690000
P56960	Exosc10	885725	946597	826242	942074	941207	775502	772188	817824	1030000	1090000	1090000	1280000	1150000	1070000
P57016	Lad1	1010000	1420000	875254	1160000	625170	897794	622358	706629	455704	598774	723083	618748	868625	656430
P57080	Usp25	NA	NA	NA	326674	NA	NA	NA	NA	NA	NA	NA	NA	2690000	NA
P57716	Ncstn	903410	1220000	763918	1150000	954280	1030000	821974	1530000	819644	1170000	1130000	1110000	1100000	1410000
P57746	Atp6v1d	1400000	1540000	2480000	1680000	1800000	1720000	1970000	1910000	1560000	2000000	3080000	2810000	1960000	2330000
P57759	Erp29	6700000	7950000	10900000	9730000	4010000	5680000	5090000	6050000	5550000	6050000	7340000	6750000	5460000	6890000
P57776	Eef1d	22400000	23300000	20700000	23400000	18400000	22700000	19700000	19000000	21300000	23200000	21900000	22300000	18200000	21600000
P57780	Actn4	14700000	13700000	13500000	14900000	19000000	16300000	18800000	17500000	18800000	21500000	16000000	15800000	18600000	17000000
P57784	Snrpa1	808784	959685	1730000	1050000	930459	750809	754557	843573	955235	1260000	1550000	1140000	903835	820244
P58021	Tm9sf2	721425	771652	526344	635187	691600	732717	433593	NA	NA	685238	NA	NA	548622	545093
P58044	Idi1	380249	115701	500099	293843	250414	285880	545195	216895	286791	223446	492864	351311	494011	408382
P58058	Nadk	1770000	1470000	941703	1180000	1470000	1390000	1060000	1680000	1410000	1320000	954210	1040000	1010000	1370000
P58059	Mrps21	1700000	1480000	3180000	4990000	1660000	2090000	2370000	1580000	2660000	4410000	1870000	3720000	5130000	4400000
P58064	Mrps6	1310000	3980000	2050000	1500000	481283	972782	648921	1140000	778243	1650000	1620000	1470000	1890000	1480000
P58137	Acot8	3060000	2960000	3410000	2650000	5370000	3320000	4250000	3810000	3550000	2780000	2910000	2690000	2670000	2920000
P58158	B3gat3	338271	NA	252721	NA	610128	373390	853267	833192	857939	604338	501035	703209	738479	729164
P58252	Eef2	148000000	143000000	126000000	125000000	169000000	155000000	194000000	166000000	151000000	141000000	125000000	105000000	124000000	122000000
P58269	Dpf3	NA	NA	NA	NA	97997.3	95541.6	114859	72096.8	361970	299788	117807	187026	102426	112628
P58281	Opa1	3730000	2690000	4050000	4310000	6070000	4850000	6620000	5530000	6720000	6560000	6170000	5470000	5450000	4490000
P58389	Ptpa	1840000	1360000	2110000	2000000	1170000	1890000	1540000	2220000	1640000	1430000	2200000	2790000	2260000	1650000
P58404	Strn4	564418	635908	501188	705464	665482	677884	574599	385986	432639	699404	536741	618024	926153	1120000
P58462	Foxp1	418562	267060	190716	483766	403342	341792	265527	442863	246040	484248	366596	458540	432164	271593
P58466	Ctdsp1	267889	202402	254817	204673	NA	439585	204066	158668	225523	182707	NA	467851	639943	472451
P58468	Slx9	2150000	859329	1600000	1970000	814337	2470000	NA	NA	NA	568613	1330000	1830000	3000000	3950000
P58501	Paxbp1	337774	683781	NA	NA	332046	264870	339246	485136	407936	234635	470402	324958	NA	NA
P58710	Gulo	8440000	7850000	8670000	7570000	11000000	9670000	9790000	8580000	6960000	6930000	4630000	5910000	8440000	7250000
P58735	Slc26a1	1820000	2090000	2060000	2470000	1700000	2160000	1580000	896831	1270000	1420000	1120000	1360000	1850000	1530000
P58742	Aaas	197011	164078	280092	228526	275646	444682	171505	455217	266389	293898	395493	413590	451183	357898
P58771	Tpm1	13600000	18700000	11700000	19100000	13900000	30300000	16300000	15600000	15000000	25700000	14200000	27100000	24700000	35900000
P58774	Tpm2	1300000	1710000	1370000	2550000	2030000	3390000	1960000	1070000	1260000	1420000	1720000	1900000	2110000	2360000
P58802	Tbc1d10a	680155	342223	1110000	443814	1330000	856141	1230000	1630000	1230000	1700000	2250000	1070000	1180000	1560000
P58854	Tubgcp3	415309	153966	NA	193330	255780	216895	NA	335006	192307	196684	247145	216906	366651	183964
P58871	Tnks1bp1	19500000	18500000	13600000	15100000	18900000	17700000	14600000	17300000	14800000	16300000	14900000	17700000	15700000	14000000
P59016	Vps33b	357471	290038	445198	275799	485131	658509	527799	340901	590695	521362	416426	766225	571551	315125
P59017	Bcl2l13	599957	573393	454278	407169	364470	521020	407069	522596	277071	356999	423604	580685	547451	615555
P59034	Lrrc3	NA	NA	NA	NA	NA	NA	NA	NA	NA	NA	NA	NA	NA	NA
P59041	Dnajc30	133718	NA	NA	NA	NA	172040	NA	106931	96712.2	NA	NA	120993	NA	153817
P59048	Pdrg1	222694	343951	444556	363424	204564	188142	NA	195920	151223	187092	247821	327968	290021	353018
P59108	Cpne2	NA	NA	64305.7	NA	289435	NA	321106	185038	283716	129024	193196	118344	139941	267339
P59114	Pcif1	247661	194053	384418	269657	440448	367542	252973	321572	500148	414136	324875	441424	350635	368109
P59222	Scarf2	NA	667797	431706	504408	NA	575840	NA	NA	NA	603819	NA	636996	631891	NA
P59235	Nup43	237453	306873	641738	519439	507230	383955	575338	644741	346586	686197	636471	482922	510615	299176
P59242	Cgn	7950000	7330000	7300000	7000000	7570000	9220000	8330000	7510000	8210000	8110000	8060000	9180000	8930000	9200000
P59325	Eif5	10200000	15200000	10600000	10800000	11200000	12300000	9830000	15000000	12700000	11200000	13200000	11800000	11100000	13300000
P59438	Hps5	NA	NA	NA	NA	283447	138997	280871	344181	317020	342401	310468	NA	162155	379889
P59672	Anks1a	1650000	1470000	1380000	1180000	1180000	1740000	1340000	1270000	1240000	1220000	1370000	1560000	1150000	1080000
P59729	Rin3	448017	334114	553615	380113	421576	490516	348177	535579	426653	478272	478071	426375	540514	442126
P59759	Mrtfb	588042	598500	543745	460681	541759	361677	419462	494406	480677	571731	553465	410471	328628	431459
P59764	Dock4	620541	948151	409025	427034	267433	NA	184190	165783	207285	288094	NA	NA	150172	NA
P59808	Sash1	389665	560375	182228	164494	132445	126727	46474.7	166131	105817	77102	107268	180648	95577.3	81713.1
P59913	Pcmtd1	1680000	1310000	1330000	1160000	2860000	1040000	2840000	1950000	1620000	2710000	2190000	1760000	2310000	1690000
P59999	Arpc4	2700000	2410000	3080000	3590000	4910000	3240000	3780000	5260000	4040000	4920000	6850000	4430000	5230000	5870000
P60122	Ruvbl1	1620000	1650000	2000000	2280000	2780000	1880000	2920000	2130000	2060000	2530000	2830000	1930000	1790000	2070000
P60229	Eif3e	2020000	1980000	2560000	2380000	2200000	1860000	2500000	1550000	1880000	1720000	1630000	1720000	1800000	1400000
P60334	Cdo1	265992	438509	456787	460824	253661	320908	284197	65872.7	222002	250393	NA	167356	596865	592383
P60335	Pcbp1	11100000	13100000	12600000	9140000	9140000	8360000	11700000	14300000	11400000	11100000	15000000	9160000	11200000	9750000
P60521	Gabarapl2	561212	1040000	504082	416622	NA	436765	364208	528242	185210	392156	337335	349961	340671	429856
P60603	Romo1	4400000	3440000	4440000	3910000	1810000	3390000	2260000	428119	3040000	2540000	1590000	2280000	2330000	1890000
P60670	Nploc4	3570000	3770000	3680000	3860000	4100000	3330000	3820000	3130000	3370000	2420000	2540000	2520000	2540000	2430000
P60710	Actb	65700000	72600000	66800000	75000000	29200000	67200000	44800000	40200000	40800000	62400000	38700000	75000000	62600000	69200000
P60762	Morf4l1	221429	447817	112468	374853	318423	242946	247181	160954	250995	238091	186040	222190	277511	NA
P60766	Cdc42	2830000	3870000	2420000	1980000	3340000	2290000	2740000	2540000	2850000	2490000	1050000	1610000	2850000	2320000
P60824	Cirbp	NA	NA	NA	NA	486588	NA	502190	673086	664799	717573	458817	420176	497597	549336
P60843	Eif4a1	8610000	8450000	14000000	8740000	10300000	7700000	10800000	7700000	10400000	13400000	13200000	8880000	9120000	8170000
P60867	Rps20	35800000	45000000	36800000	41400000	9940000	32200000	15200000	32800000	10700000	12400000	4800000	33100000	37400000	24500000
P60904	Dnajc5	179291	109827	NA	168801	118633	207515	175339	93448.2	NA	95653.5	NA	177280	159002	144498
P61021	Rab5b	530808	840982	859309	922330	1040000	560401	896925	931833	1080000	801708	1030000	643558	906685	859040
P61022	Chp1	312578	360098	607345	411307	286543	400887	289433	348995	186067	400412	617847	440689	316394	191886
P61027	Rab10	1300000	435682	967812	1680000	907506	697618	1620000	1180000	727472	876225	1040000	1500000	1190000	1420000
P61028	Rab8b	1830000	1670000	2310000	1840000	2720000	2170000	2720000	1730000	2610000	2410000	2790000	2130000	2370000	2420000
P61079	Ube2d3	NA	NA	413269	303772	237835	NA	330544	560837	312574	436525	501698	490379	570318	330043
P61082	Ube2m	4060000	5760000	5440000	4550000	3800000	3590000	3380000	3380000	2950000	3740000	3530000	3200000	3330000	3190000
P61087	Ube2k	424875	148833	343382	369359	254662	406623	302190	382647	577578	476681	600361	350670	NA	NA
P61089	Ube2n	3840000	7190000	3600000	4450000	3150000	3980000	2890000	4760000	2630000	3450000	3410000	5240000	4670000	3370000
P61148	Fgf1	471689	504535	516598	485837	312921	388942	409514	376682	414813	385000	386726	381124	414136	399633
P61161	Actr2	5450000	5160000	5570000	6040000	6470000	5490000	6740000	5830000	5380000	5580000	5450000	4460000	5690000	6200000
P61164	Actr1a	1150000	685547	2250000	900244	1060000	860489	1210000	961238	980505	1190000	1500000	1130000	684289	1010000
P61202	Cops2	1330000	964716	1520000	1290000	2150000	1770000	1990000	1430000	1610000	1470000	1720000	1480000	1340000	1680000
P61205;P84078	Arf1;Arf3	2340000	1850000	1750000	2110000	2080000	2210000	1970000	2220000	1930000	2040000	2130000	1540000	1570000	1730000
P61211	Arl1	NA	NA	NA	NA	265963	NA	335249	664255	255919	NA	NA	85658.7	215978	198323
P61222	Abce1	1630000	1400000	2000000	2080000	2480000	1880000	3200000	2240000	2520000	2260000	2290000	2000000	2030000	2140000
P61226	Rap2b	NA	NA	NA	NA	NA	NA	88025.7	NA	73758.8	NA	NA	NA	114854	NA
P61255	Rpl26	69300000	78200000	55500000	68400000	29100000	65900000	43000000	37500000	48600000	51400000	47000000	64600000	80100000	54000000
P61290	Psme3	135481	NA	794816	639257	NA	244680	699447	612929	453476	658902	511643	546586	612906	556535
P61327;Q9CQL1	Magoh;Magohb	NA	NA	NA	NA	NA	NA	NA	NA	NA	NA	NA	NA	NA	NA
P61358	Rpl27	94300000	98100000	68300000	83600000	72900000	82100000	73200000	87400000	91600000	89600000	81200000	79100000	106000000	81100000
P61406	Smg6	86826.2	209184	183835	159563	147132	123298	128909	73863	61075.1	40267	71518.3	206200	194280	NA
P61458	Pcbd1	19700000	23800000	19100000	16700000	14000000	18400000	18500000	11700000	20200000	19300000	23000000	27900000	22800000	17800000
P61514	Rpl37a	39500000	49900000	19500000	32300000	25600000	27700000	22200000	10200000	30800000	22000000	11700000	14000000	27300000	17900000
P61620	Sec61a1	NA	NA	96194.1	NA	605813	NA	429883	NA	198743	364815	NA	NA	151540	NA
P61759	Vbp1	597649	819272	1260000	1010000	777267	438141	486501	466765	787779	719408	807122	634047	365003	626153
P61922	Abat	15000000	9080000	13900000	10900000	17300000	11400000	15200000	15400000	16000000	13300000	14300000	10400000	10800000	11400000
P61924	Copz1	1090000	2240000	889048	979022	1730000	884792	1660000	1080000	1310000	2510000	1320000	1100000	1580000	1680000
P61961	Ufm1	3200000	2110000	2330000	3520000	4560000	3460000	3700000	2780000	3380000	5830000	5020000	4430000	4390000	2900000
P61963	Dcaf7	363872	103683	342451	NA	171594	247005	190326	304855	167391	135651	134405	143026	262218	232404
P61965	Wdr5	590793	527686	560763	520676	726752	503677	564822	624785	749861	659569	651743	411654	587058	597024
P61967	Ap1s1	442993	741467	1140000	976345	1280000	1540000	1000000	765405	725837	1240000	767348	767273	1100000	1030000
P61971	Nutf2	NA	NA	NA	NA	NA	NA	46557.5	122167	51587.1	95431.9	109619	NA	136574	52101.4
P61979	Hnrnpk	10100000	6250000	11200000	12100000	16300000	10900000	11200000	14800000	11900000	12700000	10400000	10200000	11700000	7900000
P61982	Ywhag	1920000	2090000	3150000	3040000	1640000	3700000	1540000	2340000	1870000	1760000	1310000	4250000	3230000	3260000
P62046	Lrch1	229285	101421	296239	NA	342107	184852	286702	285217	278081	295276	477571	319148	321551	527360
P62071	Rras2	140762	78563	211752	160180	339413	266546	745122	608582	523134	541389	354499	307881	372510	176460
P62073	Timm10	968317	1050000	803704	914727	822225	914983	973938	1330000	964554	877094	675388	835509	437396	NA
P62075	Timm13	4420000	3100000	3820000	5430000	4320000	3720000	3280000	9990000	5720000	8070000	15100000	7920000	7550000	8940000
P62082	Rps7	24700000	14000000	19600000	21800000	16600000	24400000	18900000	20300000	25400000	18100000	20500000	27200000	24500000	27000000
P62137	Ppp1ca	888905	778169	2420000	1120000	1750000	1450000	1200000	1230000	1340000	1490000	1650000	1670000	1530000	2350000
P62141	Ppp1cb	886424	730091	1010000	894714	878650	1300000	534053	708648	743004	550040	664427	1370000	550501	410589
P62192	Psmc1	6830000	9200000	9710000	7590000	11200000	7520000	9570000	11200000	11700000	9480000	10500000	9810000	9450000	11000000
P62196	Psmc5	6220000	5080000	8800000	5880000	8150000	6290000	8030000	6120000	6770000	8570000	10000000	7720000	5860000	6990000
P62242	Rps8	48300000	43000000	38800000	46400000	46400000	54200000	48500000	32700000	42000000	31200000	33400000	49100000	46500000	39900000
P62245	Rps15a	8840000	12100000	13100000	14200000	7910000	9270000	12700000	10800000	11200000	14900000	14900000	15200000	16100000	13200000
P62254	Ube2g1	743818	715722	1180000	895936	503189	1060000	973305	993226	460613	747135	1060000	1170000	781102	722958
P62257	Ube2h	206289	NA	156743	NA	181353	54995.3	184990	219064	102805	109629	220245	107429	118181	78572.4
P62259	Ywhae	11200000	16400000	19300000	17000000	13900000	17000000	16100000	11700000	18100000	19700000	16400000	18300000	15800000	22100000
P62264	Rps14	53500000	106000000	62900000	86700000	27800000	45600000	33400000	42300000	35000000	36000000	32100000	48000000	55900000	45700000
P62267	Rps23	126000000	179000000	183000000	233000000	48400000	226000000	40200000	41000000	45200000	78600000	57900000	201000000	218000000	75300000
P62270	Rps18	27000000	13900000	35400000	19300000	23900000	28400000	30700000	19700000	32600000	38400000	37100000	38700000	31100000	36500000
P62274	Rps29	21000000	42800000	21900000	26900000	8170000	16800000	5620000	8000000	6630000	6420000	7000000	19800000	15400000	14100000
P62281	Rps11	47600000	66200000	52100000	51500000	29900000	54100000	39100000	28600000	30400000	32900000	28500000	48800000	48700000	38000000
P62301	Rps13	15100000	14700000	35200000	22200000	23100000	15000000	29600000	9450000	22400000	18400000	16300000	21700000	12900000	17300000
P62305	Snrpe	194914	876826	110000	1060000	154900	516461	197632	214007	156676	165570	500979	372969	600471	415656
P62311	Lsm3	105429	116004	88544.5	35107.1	26072.4	37473.4	NA	155341	25911.7	50446.7	65938.5	49006.8	66507	73601.8
P62315	Snrpd1	1210000	1610000	2060000	2320000	1380000	2040000	1470000	1210000	2120000	1930000	1880000	1670000	1450000	1410000
P62317	Snrpd2	10700000	12100000	12500000	15400000	8390000	9990000	9520000	11000000	11300000	13400000	11400000	15300000	13500000	11500000
P62320	Snrpd3	2760000	3140000	2920000	2890000	2830000	3370000	3580000	4430000	4390000	4460000	4140000	5010000	4660000	4180000
P62331	Arf6	542036	326035	343292	315124	598447	466348	672102	532750	564795	414924	1030000	629941	715716	578852
P62334	Psmc6	7680000	5660000	15400000	9370000	10500000	6700000	10300000	8840000	8250000	10600000	13500000	10300000	5640000	10100000
P62342	Selenot	56196.7	124281	26577.8	94237.7	108365	100642	54406.7	NA	79528	NA	NA	56865.1	67090	59747.3
P62627	Dynlrb1	662107	1060000	953378	635305	354817	727583	582461	911629	780152	721522	588555	977123	743121	885595
P62631	Eef1a2	4150000	3870000	3920000	3910000	3290000	4090000	2790000	4230000	4130000	3020000	1990000	3090000	890397	3500000
P62700	Ypel5	550199	NA	464774	397745	NA	227299	NA	NA	NA	NA	NA	165141	511237	NA
P62702	Rps4x	70400000	62200000	51200000	44100000	59900000	55000000	66800000	57800000	63600000	62500000	55500000	62300000	53400000	50600000
P62715	Ppp2cb	NA	NA	NA	NA	NA	NA	239261	NA	NA	NA	737509	NA	NA	NA
P62717	Rpl18a	36000000	20900000	27500000	22900000	16800000	26000000	24600000	17900000	23400000	22500000	16100000	24200000	22300000	25400000
P62737;P63268;P68033	Acta2;Actc1;Actg2	NA	NA	253127	197628	NA	281804	NA	208960	203536	NA	285065	215689	NA	349167
P62743	Ap2s1	4300000	3430000	2580000	2920000	2830000	2910000	3480000	NA	3370000	3360000	NA	NA	NA	NA
P62746	Rhob	666013	770780	491184	457967	408166	775070	398236	169233	431016	490682	321397	NA	484588	176992
P62748	Hpcal1	726499	365567	923635	869652	417402	690228	524478	286167	450636	415224	435595	589469	594914	443302
P62751	Rpl23a	78500000	62300000	72500000	54100000	59200000	73000000	67200000	83900000	85700000	82200000	57700000	81700000	73600000	65600000
P62754	Rps6	146000000	127000000	116000000	128000000	89500000	132000000	111000000	88700000	121000000	120000000	110000000	136000000	139000000	92100000
P62774	Mtpn	995085	1180000	1020000	880948	1170000	1040000	1160000	1370000	1170000	1340000	1930000	1950000	1460000	1220000
P62806	H4c16	80500000	78100000	169000000	84400000	95900000	88500000	115000000	94800000	139000000	133000000	196000000	174000000	131000000	134000000
P62814	Atp6v1b2	3790000	3420000	4840000	3320000	5130000	4030000	6320000	5400000	5150000	5120000	5460000	4950000	5220000	6130000
P62821	Rab1A	10900000	4940000	9630000	9230000	14000000	8990000	12600000	10900000	9120000	8880000	11200000	6710000	8580000	10800000
P62827	Ran	3140000	2150000	5120000	2360000	4950000	3530000	5240000	3980000	4400000	3930000	4740000	5210000	3650000	4830000
P62830	Rpl23	41400000	45200000	42200000	50000000	33900000	44800000	51100000	40700000	55600000	60100000	57700000	53100000	66400000	50600000
P62835	Rap1a	2020000	2310000	1540000	971557	1800000	1470000	2040000	1420000	1430000	1460000	1280000	1100000	1300000	1010000
P62843	Rps15	1670000	11500000	3780000	6930000	730721	4430000	1410000	908749	915130	1220000	671046	1320000	1230000	1080000
P62849	Rps24	16300000	14200000	13000000	13100000	13200000	17100000	15900000	16700000	15600000	19300000	16800000	17700000	20000000	15600000
P62852	Rps25	373000000	600000000	373000000	528000000	236000000	399000000	239000000	265000000	270000000	263000000	182000000	446000000	404000000	395000000
P62855	Rps26	4450000	4170000	6940000	2370000	6810000	7430000	10100000	5060000	2200000	4370000	9000000	5260000	7210000	7430000
P62858	Rps28	11100000	13000000	6180000	10200000	4310000	7200000	6610000	4810000	6320000	14800000	6510000	8880000	12300000	11100000
P62869	Elob	140300	569050	389026	441722	114604	392807	303479	NA	NA	157330	320586	NA	315297	557838
P62874	Gnb1	4160000	1570000	3380000	2810000	4670000	5170000	5230000	3170000	3220000	3900000	5210000	6970000	3420000	5010000
P62880	Gnb2	6820000	6130000	5670000	6820000	6980000	6330000	7960000	13400000	11500000	7000000	12600000	6890000	9220000	14400000
P62889	Rpl30	44000000	48000000	50300000	56200000	27900000	37400000	37200000	31800000	40100000	40600000	31600000	43000000	47700000	41900000
P62892	Rpl39	640813	NA	NA	NA	NA	NA	NA	NA	NA	606852	NA	NA	NA	NA
P62897	Cycs	49100000	49000000	48200000	51100000	29800000	41400000	36500000	28600000	41400000	46600000	34900000	48200000	49900000	38200000
P62900	Rpl31	17200000	9040000	14200000	10500000	17300000	15900000	16100000	18200000	18700000	19000000	15400000	25100000	22200000	18200000
P62908	Rps3	20700000	18200000	27000000	18800000	20800000	17400000	22800000	23900000	25300000	27000000	33800000	26500000	24500000	25900000
P62911	Rpl32	13500000	13800000	14900000	12200000	8790000	11500000	9770000	11400000	12500000	14700000	10500000	13000000	12200000	10800000
P62915	Gtf2b	371415	367541	384505	398357	279544	252015	250215	520554	534086	493113	582354	272381	288789	244154
P62918	Rpl8	58700000	65200000	43300000	61500000	20900000	50700000	29500000	32300000	31700000	26500000	24300000	47500000	54000000	44400000
P62960	Ybx1	9610000	14300000	9350000	10700000	11100000	10200000	11100000	16000000	13000000	11800000	14900000	9590000	14000000	9940000
P62962	Pfn1	15000000	19300000	18000000	16800000	14400000	11000000	15500000	21100000	13200000	16400000	17100000	19600000	23400000	23200000
P62983	Rps27a	109000000	112000000	86300000	104000000	73400000	93200000	57400000	37500000	72200000	52000000	34200000	60800000	67900000	59200000
P62996	Tra2b	315255	224601	516470	277866	620552	413197	594363	448965	469838	418284	459593	468341	591415	525449
P63001	Rac1	4630000	3680000	3890000	3640000	3650000	4960000	4100000	4200000	4890000	5250000	4520000	4280000	5060000	4640000
P63005	Pafah1b1	1140000	1080000	985640	1180000	1540000	1190000	1160000	1160000	1060000	896429	923106	700452	918415	1020000
P63017	Hspa8	103000000	81800000	104000000	94700000	122000000	106000000	135000000	106000000	106000000	102000000	90700000	79700000	95200000	110000000
P63024	Vamp3	510556	943734	289510	281854	539629	456586	724985	533109	576734	414884	310029	372753	324157	352389
P63028	Tpt1	878531	388827	805496	387743	795523	542253	1080000	797389	1020000	1690000	1550000	938068	1210000	1060000
P63030	Mpc1	NA	NA	NA	NA	NA	NA	158918	NA	NA	NA	NA	111841	NA	NA
P63037	Dnaja1	7620000	7100000	5380000	6740000	7520000	7190000	7060000	5820000	5110000	6700000	4970000	5530000	6700000	5670000
P63038	Hspd1	114000000	84000000	144000000	115000000	127000000	120000000	138000000	111000000	158000000	161000000	175000000	180000000	125000000	160000000
P63073	Eif4e	2370000	2340000	2400000	2100000	2340000	1660000	2200000	1860000	1870000	2130000	1830000	1580000	1620000	1660000
P63085	Mapk1	341674	224067	483320	281384	531805	404145	539722	323382	348741	631536	431853	472754	498288	510748
P63101	Ywhaz	11900000	9060000	15600000	11600000	7130000	14500000	7830000	7070000	5330000	8890000	6420000	16700000	10300000	11900000
P63139	Nfyb	194507	253916	238524	260490	267767	198904	NA	247004	145597	315442	343625	244672	266573	132872
P63154	Crnkl1	802936	1640000	869541	605507	783689	1170000	747142	903280	866818	799595	1040000	1190000	1030000	561641
P63158	Hmgb1	31500000	33600000	23900000	22500000	26100000	26300000	25500000	30900000	33200000	35400000	29200000	26600000	36800000	25600000
P63166	Sumo1	NA	NA	NA	NA	NA	NA	201562	NA	NA	NA	NA	NA	NA	NA
P63168	Dynll1	NA	NA	NA	NA	124963	NA	NA	NA	308972	NA	NA	NA	NA	NA
P63242	Eif5a	11100000	13900000	14700000	11100000	11200000	10300000	11400000	11000000	11100000	13900000	11100000	7820000	11300000	9870000
P63254	Crip1	203243	234822	234157	188178	127828	211071	139130	90112.8	NA	212709	102736	124680	297453	299555
P63260	Actg1	4170000	NA	3190000	NA	13600000	3960000	15500000	12900000	15000000	20700000	20200000	13800000	23800000	23600000
P63276	Rps17	22200000	27400000	33300000	25700000	15300000	21800000	21300000	14800000	20800000	19200000	22700000	23600000	19700000	18300000
P63280	Ube2i	1160000	1200000	969423	875943	793495	741070	687366	1220000	839393	781693	1550000	1580000	811081	596217
P63321	Rala	950913	752150	944205	558068	1200000	990207	1310000	1280000	1470000	1410000	1250000	937331	1330000	1250000
P63323	Rps12	19100000	31800000	18100000	24400000	13800000	15800000	15900000	11600000	14700000	14400000	11300000	13900000	12500000	15000000
P63325	Rps10	9050000	19200000	23200000	9920000	12600000	12000000	14600000	13900000	14500000	15100000	20100000	16700000	14500000	13400000
P63328	Ppp3ca	352786	371353	1030000	760996	530331	536753	417344	878481	498761	830704	613514	401912	650178	544723
P63330	Ppp2ca	2740000	2760000	2130000	1370000	2810000	2550000	2800000	2340000	2610000	2200000	1890000	1390000	1490000	1830000
P67778	Phb1	2470000	2150000	2720000	2490000	4500000	2930000	7000000	4790000	6710000	7370000	7370000	6390000	5750000	5280000
P67871	Csnk2b	NA	NA	667013	375198	337590	241237	NA	NA	273591	377352	433927	384100	292984	271814
P67984	Rpl22	110000000	95000000	108000000	106000000	111000000	126000000	120000000	34500000	115000000	127000000	107000000	102000000	148000000	87300000
P68037	Ube2l3	7490000	8070000	11000000	8180000	9960000	7680000	7720000	7830000	11200000	6030000	5970000	8800000	7790000	6990000
P68040	Rack1	7440000	5640000	6460000	8670000	9330000	8530000	8950000	8250000	7320000	7470000	7890000	6030000	7500000	6650000
P68134	Acta1	4890000	2720000	7150000	4450000	3460000	7090000	6700000	8760000	6000000	9020000	5920000	7320000	7330000	8330000
P68181	Prkacb	963740	706558	958835	812135	844506	1130000	1170000	1020000	918717	850232	887628	900237	949659	1050000
P68254	Ywhaq	516155	305538	459034	372039	192254	525535	228959	220398	241223	383098	228359	659374	601460	564768
P68368	Tuba4a	50400000	48900000	52200000	53900000	72800000	53400000	53900000	52400000	53500000	56000000	50400000	44800000	45200000	46700000
P68372	Tubb4b	43100000	45300000	45200000	49600000	44300000	41400000	47300000	41100000	38200000	50000000	47900000	42700000	45800000	58100000
P68373	Tuba1c	14100000	13100000	14400000	15000000	15600000	13700000	18600000	12900000	14000000	13900000	13800000	10800000	10700000	11900000
P68404	Prkcb	154928	389586	NA	66171.6	182324	159842	165591	162032	108258	NA	117162	150281	165020	215265
P68510	Ywhah	779098	193199	1000000	412705	367098	1040000	724688	528779	741663	855802	896663	1250000	575319	1660000
P69566	Ranbp9	735097	761631	567955	855402	673873	700567	705427	677129	581580	480252	551259	610747	386906	522704
P70121	Zhx1	96403.4	286906	NA	194135	NA	NA	NA	NA	NA	120709	NA	161052	220565	208392
P70122	Sbds	3730000	3890000	3640000	3590000	4090000	4180000	4020000	4270000	4540000	4650000	4970000	4020000	4140000	3940000
P70158	Smpdl3a	461335	617459	854604	NA	522639	616570	NA	899656	463686	493937	468481	348031	291394	NA
P70168	Kpnb1	2600000	1290000	3390000	3230000	3930000	2350000	5360000	3940000	4550000	3900000	4010000	4130000	3560000	4620000
P70175	Dlg3	345426	NA	252026	383316	252140	37633.1	281609	313659	343436	294536	421607	321449	428894	296969
P70182	Pip5k1a	257768	NA	203525	224803	389177	158835	NA	261299	235526	338404	311732	321501	415736	363587
P70194	Clec4f	2200000	2780000	2440000	3310000	3210000	2320000	3020000	2010000	2840000	2960000	1820000	2230000	1960000	3390000
P70195	Psmb7	946562	187578	1370000	599301	1780000	1450000	1730000	1500000	1550000	2410000	1410000	1690000	1880000	1760000
P70196	Traf6	NA	NA	NA	NA	NA	NA	117004	NA	90211.1	74036.6	NA	NA	NA	NA
P70236	Map2k6	916541	1900000	2180000	1150000	826089	872622	1230000	877438	699662	1610000	410430	1490000	1440000	864514
P70245	Ebp	28600000	31500000	21400000	32900000	16100000	21000000	15900000	8340000	13400000	10900000	10300000	11200000	16400000	10600000
P70248	Myo1f	NA	NA	NA	NA	86055.3	89516.7	NA	85183.2	NA	NA	NA	NA	NA	110621
P70255	Nfic	2150000	1310000	1530000	1530000	954922	1980000	1430000	1360000	1760000	1490000	1190000	1740000	2090000	816014
P70257	Nfix	718606	501595	561466	573733	696488	465575	523474	642786	619305	519858	562473	395270	519147	463054
P70261	Pald1	225079	183994	252726	229404	227455	205145	210957	232135	233854	233557	188060	238496	332228	206319
P70266	Pfkfb1	1720000	1210000	1760000	1470000	2900000	1460000	2100000	1440000	1380000	1970000	1530000	1260000	1210000	1190000
P70268	Pkn1	544059	NA	255024	621601	800189	494355	579598	443601	740868	836872	813429	604299	361923	956521
P70274	Selenop	2160000	1370000	1510000	1900000	2960000	1610000	1980000	2390000	1990000	2650000	2800000	922878	NA	3050000
P70279	Surf6	2100000	1280000	883810	1630000	960222	1860000	1190000	1400000	1390000	2460000	1750000	2640000	2070000	2610000
P70288	Hdac2	NA	NA	NA	NA	NA	155677	NA	NA	NA	NA	NA	NA	NA	NA
P70290	Mpp1	2560000	2580000	2400000	2850000	3320000	2520000	3350000	5750000	3690000	3510000	4040000	4000000	2990000	5000000
P70295	Aup1	2530000	844128	1600000	1490000	3450000	2710000	3440000	2970000	3260000	2930000	2310000	2640000	2510000	2640000
P70296	Pebp1	7930000	17900000	11500000	10000000	7710000	9650000	10700000	9820000	4620000	9340000	11100000	7850000	8020000	6730000
P70297	Stam	540789	379459	718451	472507	519628	534029	537415	718734	560800	658047	506888	678553	442331	467409
P70302	Stim1	1500000	1180000	1450000	1440000	1640000	1410000	1390000	1530000	1250000	1980000	1680000	1460000	1500000	1920000
P70303	Ctps2	1520000	862772	1170000	851892	1610000	1110000	1300000	1480000	1240000	1070000	992134	1670000	975618	981075
P70313	Nos3	65361.2	NA	177272	147861	134966	NA	149840	161891	165162	132627	167064	75265.6	117075	121069
P70315	Was	293674	127214	65776.4	70976.7	98843.5	81836.4	NA	NA	37810	127584	81639.8	108306	NA	112377
P70318	Tial1	924063	944899	955376	1030000	864789	753994	928347	830801	829754	621163	681083	948806	727305	588486
P70324	Tbx3	180416	155568	172870	143311	145831	121577	121065	188253	116310	167653	260909	148481	140168	156721
P70333	Hnrnph2	7980000	5460000	5320000	6180000	8110000	5110000	6980000	7610000	7080000	7250000	5940000	5260000	6570000	6480000
P70335	Rock1	1460000	1630000	1640000	1790000	1940000	2070000	1910000	1790000	1750000	1710000	1740000	2200000	1820000	1700000
P70336	Rock2	1170000	1110000	1070000	1130000	1460000	1450000	1180000	1270000	1300000	1220000	1310000	1380000	1210000	1240000
P70340	Smad1	1820000	1710000	1160000	1520000	1240000	1090000	542654	1270000	1000000	1270000	1230000	1540000	1280000	737770
P70349	Hint1	9250000	49300000	8290000	28700000	5130000	15800000	7020000	3370000	6460000	6790000	4200000	12900000	13400000	5930000
P70362	Ufd1	1840000	2630000	1750000	1800000	1640000	1350000	1230000	1430000	1410000	1510000	1440000	1380000	1320000	1090000
P70372	Elavl1	6960000	6160000	7280000	5970000	7060000	7270000	6080000	7020000	7260000	7090000	6550000	7280000	8370000	7600000
P70375	F7	329608	382007	388773	442291	464853	388527	441853	464267	561153	418275	405773	318329	361864	437804
P70387	Hfe	763479	1230000	1270000	1840000	2520000	1630000	1140000	1040000	1000000	1100000	823514	1170000	1860000	1350000
P70388	Rad50	845650	947866	679940	1080000	1130000	1080000	1120000	955666	1130000	846393	982969	1230000	1070000	1250000
P70389	Igfals	351384	333481	265501	384848	380460	351510	370734	734937	344700	292373	142296	NA	377703	554278
P70398	Usp9x	875411	886289	813507	1070000	978032	978332	959305	744175	746914	831947	628943	635147	713471	734958
P70399	Tp53bp1	117455	NA	147307	109967	198263	393655	264173	190130	181159	138474	145967	NA	217461	205408
P70404	Idh3g	897835	1010000	1100000	1570000	1170000	1250000	1510000	1360000	1640000	1790000	1750000	1260000	1440000	1200000
P70424	Erbb2	NA	NA	494136	NA	457463	443036	573674	222175	524521	661992	621677	693375	610781	399021
P70429	Evl	165919	125086	NA	170589	201615	199510	NA	141258	94633.9	97669.7	190361	NA	NA	279649
P70441	Nherf1	115000000	134000000	94200000	113000000	53400000	99900000	86600000	72800000	79800000	94500000	80400000	117000000	136000000	107000000
P70444	Bid	NA	NA	NA	NA	NA	NA	NA	NA	NA	NA	NA	NA	NA	NA
P70451	Fer	105366	110277	114647	205058	101004	176210	NA	NA	107473	105061	55519	NA	NA	NA
P70452	Stx4	597675	578216	576642	476883	606221	532768	407495	612952	560368	673336	591553	721835	639959	606637
P70459	Erf	NA	NA	130678	146539	181876	159932	128338	NA	122132	NA	88751.5	241802	181614	168948
P70460	Vasp	1170000	2010000	1410000	1540000	1430000	1150000	926049	1080000	943584	1380000	1130000	1200000	1400000	1230000
P70663	Sparcl1	147163	124698	NA	NA	NA	51340.4	94797.7	147390	85807.8	138569	147744	195179	124788	126218
P70665	Siae	501854	893805	379253	629109	294788	460634	265677	686439	524951	436539	320099	342793	760448	447307
P70670	Naca	5920000	8290000	8290000	5980000	7790000	6920000	8560000	5560000	7930000	7430000	7450000	6020000	6710000	6490000
P70671	Irf3	NA	NA	150634	NA	253988	NA	344084	472075	247366	501126	463359	NA	467388	724700
P70677	Casp3	1180000	1210000	1250000	1280000	1290000	1260000	1280000	1420000	1260000	1420000	1100000	696516	1370000	1080000
P70694	Akr1c6	47200000	36400000	102000000	56300000	54100000	48300000	59500000	40300000	50500000	59500000	62300000	62400000	47400000	57800000
P70697	Urod	1340000	1990000	1600000	1410000	1400000	1380000	1320000	1520000	1170000	1590000	1680000	1550000	1360000	1590000
P70698	Ctps1	1160000	828378	989473	1350000	1160000	1350000	981287	1100000	949711	818573	730959	796275	992165	982871
P70699	Gaa	3280000	4740000	3940000	3410000	3240000	3110000	3750000	3330000	2800000	3910000	4280000	3650000	3790000	2760000
P80313	Cct7	3320000	3270000	6740000	4440000	5150000	4290000	5720000	4900000	4040000	4710000	5690000	3570000	3460000	3700000
P80314	Cct2	3490000	2710000	6870000	3990000	5500000	4020000	7060000	4790000	5610000	6800000	6190000	5670000	5430000	5320000
P80315	Cct4	3700000	3600000	7800000	4420000	5260000	3770000	4980000	4090000	4330000	5540000	6400000	5470000	5270000	5030000
P80316	Cct5	8720000	6860000	12500000	10100000	14100000	10000000	11700000	8460000	10800000	12500000	13200000	10000000	7630000	10800000
P80317	Cct6a	9920000	6450000	10000000	8260000	11800000	8480000	10800000	9100000	9530000	10500000	9740000	12300000	8880000	12100000
P80318	Cct3	18600000	12900000	21100000	17000000	26600000	21600000	24400000	24100000	22800000	19100000	22300000	20700000	20700000	23500000
P81117	Nucb2	362804	412316	358674	401835	525420	527796	643521	934831	851244	763881	776801	759182	726731	620121
P81269	Atf1	NA	NA	217195	NA	121357	NA	134497	237563	NA	166180	260968	NA	101729	127876
P82198	Tgfbi	435817	558826	694554	693842	1610000	877406	842779	1200000	916869	1480000	1080000	803941	1150000	1110000
P82343	Renbp	244177	NA	170129	127283	NA	373807	560202	305941	267449	NA	494782	330247	NA	NA
P82347	Sgcd	NA	NA	NA	NA	101472	NA	91209.8	NA	50468.3	NA	NA	NA	NA	90029.2
P83093	Stim2	239433	162153	262326	231444	NA	239708	241890	256469	339319	254548	163234	158667	226825	202855
P83741	Wnk1	2280000	2570000	1820000	2010000	1550000	1720000	1270000	1870000	1240000	1300000	1740000	1750000	1490000	1230000
P83870	Phf5a	1440000	1750000	1410000	1600000	1150000	1500000	980987	1490000	1500000	1640000	1320000	1270000	1390000	1420000
P83882	Rpl36a	8250000	12500000	7010000	14700000	3190000	7050000	2570000	1330000	1580000	2210000	790955	4660000	4540000	4520000
P83887	Tubg1	1270000	2880000	1320000	1560000	942888	1230000	894647	743119	959342	1160000	1100000	1390000	1400000	814297
P83917	Cbx1	NA	183308	195134	127289	177568	177262	184362	NA	208347	149763	122486	175856	231495	552321
P83940	Eloc	414204	494393	739203	596767	963612	548063	788027	984184	639845	1220000	799382	524276	1130000	723410
P84084	Arf5	582735	281348	235405	NA	352128	424042	190356	342793	183863	130172	190411	NA	187748	66963.7
P84089	Erh	2310000	2580000	1520000	2580000	2000000	2220000	2200000	2330000	3270000	3960000	2510000	3310000	3750000	4280000
P84091	Ap2m1	4690000	3610000	4720000	4710000	5610000	4980000	6340000	4440000	4830000	3620000	3700000	3430000	4870000	5550000
P84096	Rhog	1180000	1230000	808367	705049	682454	684519	912682	958464	930188	1140000	996083	750014	1020000	1250000
P84099	Rpl19	10900000	8300000	10600000	8030000	7790000	9420000	9220000	11600000	9830000	11200000	8790000	9710000	13400000	10100000
P84104	Srsf3	45100000	53200000	35500000	45600000	31200000	45500000	34300000	21400000	35000000	32100000	22600000	26900000	36900000	42600000
P85094	Isoc2a	1600000	1990000	1690000	1630000	2110000	1630000	3180000	1550000	3230000	2150000	3100000	2610000	2000000	2690000
P97287	Mcl1	406184	448372	543821	477371	358343	202555	226405	NA	291595	NA	406883	221768	216667	282474
P97290	Serping1	975421	1810000	976742	1070000	1510000	1240000	1410000	1080000	1740000	1450000	1430000	996045	1020000	1150000
P97298	Serpinf1	NA	NA	519508	216797	427707	NA	473172	NA	377044	449213	651918	268332	NA	NA
P97300	Nptn	3720000	3470000	4270000	3530000	5440000	4970000	5220000	4580000	4340000	3910000	3760000	2960000	3830000	3730000
P97302	Bach1	412712	283965	304928	407671	436200	352570	379487	680270	343053	373592	494347	390759	333269	499762
P97311	Mcm6	45954.8	NA	NA	NA	199331	186471	NA	222434	79657.4	108962	NA	NA	105495	663332
P97313	Prkdc	NA	NA	NA	NA	NA	NA	NA	NA	NA	NA	NA	NA	NA	NA
P97314	Csrp2	NA	NA	NA	NA	NA	221182	NA	NA	NA	NA	NA	196272	NA	NA
P97315	Csrp1	1010000	1450000	1080000	784306	1100000	1100000	632344	912471	1080000	757642	742321	829735	1120000	716073
P97325	St3gal3	126828	274366	112209	187118	169793	211935	186719	117338	78411.5	143212	149848	67486.5	96116.5	117922
P97328	Khk	22900000	23600000	35600000	34200000	28700000	22600000	26200000	14500000	19200000	20500000	20000000	11100000	18100000	26400000
P97333	Nrp1	80221.8	153541	49419.1	105864	107948	70929	117971	NA	127894	95427.5	112715	25027.9	NA	NA
P97348	Rhod	704128	605220	588864	715743	643880	717550	503157	538323	515812	559430	510584	638044	649941	564671
P97351	Rps3a	89400000	52700000	79000000	61400000	64000000	71900000	74400000	71500000	75100000	73300000	60100000	84800000	75200000	80300000
P97352	S100a13	327832	536393	292348	728609	360588	272941	356856	252803	534484	715931	248282	583111	653373	318330
P97360	Etv6	537717	441677	314752	389515	284249	389123	99931.8	148639	183058	79812.9	225458	120557	269819	263613
P97363	Sptlc2	NA	NA	NA	NA	74885	NA	NA	NA	NA	NA	NA	NA	NA	NA
P97364	Sephs2	3530000	3860000	3420000	3480000	6000000	3840000	7730000	3480000	5880000	5920000	5820000	4520000	4720000	4090000
P97366	Evi5	621886	847024	705243	453167	595776	757203	487596	131631	585216	515013	493458	947625	445607	520000
P97370	Atp1b3	4520000	2010000	5710000	4260000	7660000	7110000	7880000	6680000	8050000	6670000	3060000	3520000	5320000	5040000
P97371	Psme1	6790000	6770000	7140000	7050000	6050000	5560000	6400000	5110000	5750000	6140000	5730000	6600000	5430000	6480000
P97372	Psme2	1080000	923814	700202	752809	740343	946635	771538	873724	731771	882153	1000000	533332	978164	733280
P97376	Frg1	1040000	897289	1120000	1060000	2270000	1440000	1100000	998600	1040000	1160000	944354	1250000	997573	1270000
P97377	Cdk2	138232	NA	148634	NA	263985	202144	402067	286936	254132	328218	268410	169128	246186	313227
P97379	G3bp2	2640000	2000000	2480000	1710000	2760000	2120000	2020000	2530000	2330000	2060000	2210000	1700000	2220000	1910000
P97384	Anxa11	1590000	1650000	3960000	2080000	3090000	2040000	2880000	2560000	2950000	3590000	3580000	2800000	2280000	2050000
P97386	Lig3	326149	NA	213020	279004	217694	336156	220143	235106	306527	378090	382858	370179	414555	381607
P97390	Vps45	249011	NA	381334	135558	490245	349821	487684	285941	340936	357355	338019	259494	271998	285438
P97393	Arhgap5	320185	261481	157993	244259	407012	267759	378260	712659	458798	447671	569380	369111	350471	287518
P97426	Ear1	192614	448044	NA	NA	256071	NA	NA	NA	NA	NA	NA	NA	NA	NA
P97429	Anxa4	2720000	3320000	4840000	4340000	6460000	4470000	6480000	4450000	4850000	4790000	5690000	4670000	3590000	4670000
P97431	Irf6	NA	NA	NA	NA	NA	NA	NA	NA	NA	NA	NA	NA	NA	NA
P97432	Nbr1	1930000	1590000	1190000	2250000	1270000	1830000	1480000	NA	579727	1410000	878722	1090000	864373	879694
P97434	Mprip	1230000	942357	1030000	951963	1460000	1320000	1460000	1150000	1320000	1290000	1260000	1390000	1410000	1430000
P97447	Fhl1	542051	1240000	552347	312564	1010000	744786	NA	1590000	920138	879333	NA	1120000	1390000	828506
P97449	Anpep	997085	791084	834154	863017	880486	922379	869214	976662	763023	910502	835735	718673	988957	911131
P97450	Atp5pf	9240000	8980000	7910000	7900000	7180000	7100000	7600000	11200000	11100000	7440000	9870000	11400000	9090000	8460000
P97452	Bop1	1100000	693533	682727	680874	854816	1080000	917451	832269	1110000	837137	1010000	844336	1150000	1040000
P97457	Myl11	NA	NA	NA	NA	NA	NA	NA	NA	NA	NA	NA	NA	NA	NA
P97461	Rps5	21700000	21000000	35900000	21800000	24100000	17600000	22200000	17900000	19000000	22800000	30500000	17800000	16800000	22800000
P97471	Smad4	209183	274455	303267	NA	193400	NA	177048	187594	262116	424509	327458	337890	217696	130291
P97473	Tarbp2	NA	120287	153071	144428	85119.1	149673	133672	NA	141778	121828	126768	181067	108006	178945
P97478	Coq7	1140000	976287	1240000	1120000	1420000	1090000	1740000	NA	1470000	2430000	2700000	1790000	NA	NA
P97493	Txn2	NA	NA	130401	NA	NA	NA	NA	NA	NA	NA	NA	NA	NA	NA
P97494	Gclc	18900000	15100000	21800000	16800000	19000000	24300000	19100000	22100000	19300000	20700000	15000000	15300000	19800000	16800000
P97496	Smarcc1	NA	NA	167149	NA	156433	145315	111438	103891	48470.6	121455	NA	NA	129548	65515.1
P97499	Tep1	129807	NA	182624	NA	266381	119167	211509	149192	244949	166670	NA	154301	163014	158701
P97501	Fmo3	11200000	2430000	3480000	1540000	2200000	3180000	NA	1760000	1810000	2620000	NA	4460000	1810000	NA
P97717	Adra1b	519211	710210	367406	NA	318866	211402	154584	NA	276103	315115	77562.7	NA	128586	426918
P97742	Cpt1a	4690000	4260000	3320000	4890000	6590000	5880000	5230000	4760000	4700000	4490000	3270000	2760000	4010000	4610000
P97760	Polr2c	123810	NA	227620	115012	NA	156437	246440	136102	98423.5	188175	255731	230652	258730	228597
P97762	rp9	258230	324627	221297	262649	409470	393867	326166	378152	NA	NA	NA	NA	NA	NA
P97765	Wbp2	1250000	915353	1040000	1080000	891315	1130000	841017	852397	630246	319167	770525	1190000	1860000	260854
P97770	Thumpd3	987647	1060000	864887	771594	1430000	981812	887794	955314	1140000	845576	1220000	965720	841855	979865
P97785	Gfra1	964877	1130000	420316	759881	362636	728649	345116	453402	450954	325394	210356	324860	316340	247218
P97789	Xrn1	582057	948257	648647	911595	589133	512610	494206	630622	366816	599662	459245	628490	568244	658297
P97792	Cxadr	3470000	2900000	2470000	2080000	2070000	2550000	1720000	2060000	1950000	1970000	1350000	1910000	1880000	1650000
P97797	Sirpa	203743	NA	139411	NA	163819	NA	NA	NA	325002	144247	248686	171341	263974	342478
P97798	Neo1	364777	303460	292420	215875	248310	345100	227947	204961	136264	145418	85190.5	115755	100315	250735
P97801	Smn1	177564	233857	257780	199719	110179	204267	NA	237072	235324	338481	293568	339023	417088	288876
P97807	Fh	14400000	14900000	27100000	16100000	20400000	13600000	18200000	20000000	20500000	24200000	28600000	15700000	17900000	16200000
P97819	Pla2g6	643072	403281	701818	524096	792259	580922	612500	571044	774120	645256	718948	571259	636826	414006
P97820	Map4k4	956050	936830	1000000	897326	870927	1080000	879181	1170000	1260000	1130000	998706	970793	1240000	967992
P97821	Ctsc	274101	475141	199392	149163	350062	147240	447083	387516	706478	385142	355010	342007	369136	682176
P97822	Anp32e	191955	308869	405524	215174	370294	418501	567493	217183	430227	570767	411796	332095	NA	619239
P97823	Lypla1	1430000	1570000	1900000	1470000	958061	1270000	1470000	1790000	1190000	1920000	2240000	2100000	1460000	1170000
P97825	Jpt1	350320	220808	190941	273915	NA	132778	106464	274588	206926	100573	251934	224066	185004	181525
P97855	G3bp1	8440000	4540000	6790000	4550000	7020000	7060000	7100000	7030000	7200000	7050000	7910000	7120000	6850000	7340000
P97861;Q9ERE2	Krt81;Krt86	NA	NA	NA	NA	445662	171050	NA	NA	NA	NA	NA	NA	NA	NA
P97863	Nfib	1460000	1720000	2120000	1620000	2320000	2440000	2200000	2450000	2390000	2710000	2170000	2040000	2050000	1260000
P97864	Casp7	2380000	2240000	3230000	2510000	3260000	2730000	3100000	1910000	2640000	2210000	2510000	2670000	2380000	2680000
P97865	Pex7	NA	NA	NA	NA	267192	380932	243786	277379	NA	NA	NA	NA	NA	NA
P97868	Rbbp6	1300000	1330000	939567	1100000	878951	1100000	612654	930350	721308	857225	785508	1410000	1170000	1110000
P97872	Fmo5	30700000	33700000	35100000	37000000	32600000	38300000	38500000	22200000	23700000	25400000	16300000	19000000	23500000	25300000
P97927	Lama4	224057	265364	291618	315917	470861	372141	229885	363050	359538	232833	226641	320254	345773	305313
P97930	Dtymk	306860	NA	376338	456462	220138	314497	534671	432892	397810	604445	624151	697649	865128	721465
P98064	Masp1	464247	551103	342413	582294	498076	556209	482003	476410	501008	397996	322924	442591	421839	394459
P98078	Dab2	1190000	2220000	1000000	1400000	1220000	1090000	1230000	1450000	1130000	1270000	1610000	1460000	1750000	1300000
P98083	Shc1	1430000	871116	1520000	1510000	1800000	1170000	1100000	1150000	1400000	873438	1280000	1520000	843237	1040000
P98086	C1qa	216888	NA	NA	NA	492908	113551	193643	336643	408175	231807	235216	329184	406124	424174
P98192	Gnpat	491505	483942	391832	512783	512123	377545	539349	309050	363491	359067	275606	115872	375692	249682
P98203	Arvcf	3040000	3260000	2660000	2520000	3750000	3080000	3710000	3670000	3870000	3800000	3550000	3590000	3330000	2630000
P99024	Tubb5	27600000	24500000	27100000	36300000	22900000	17100000	20400000	24900000	19400000	21600000	28100000	25900000	30300000	27200000
P99025	Gchfr	1450000	1650000	1070000	920757	1610000	1300000	1900000	2030000	1930000	2580000	2770000	1870000	2510000	1550000
P99026	Psmb4	2180000	2260000	2230000	2510000	1700000	1570000	1730000	2050000	1340000	1660000	1500000	1780000	1920000	2240000
P99027	Rplp2	8580000	7450000	20400000	14200000	14300000	10100000	12800000	9280000	11400000	13200000	14700000	11400000	6240000	7490000
P99028	Uqcrh	1700000	5520000	2610000	4680000	2100000	3170000	2400000	3490000	2080000	4470000	2750000	3700000	4060000	2080000
P99029	Prdx5	15400000	16400000	16700000	14300000	11600000	14400000	16700000	19800000	16600000	19500000	23700000	21200000	21700000	17600000
Q00262	Stx2	290534	149669	249295	271840	333905	201560	296315	NA	411524	201817	426894	332715	303912	343133
Q00422	Gabpa	NA	NA	NA	NA	NA	NA	NA	NA	NA	NA	NA	NA	NA	NA
Q00519	Xdh	9410000	7330000	8640000	7700000	12100000	10000000	11500000	8500000	10100000	7660000	6950000	7680000	8590000	9970000
Q00558	F8a1	NA	NA	NA	NA	NA	NA	NA	NA	NA	NA	NA	NA	NA	NA
Q00560	Il6st	607829	815250	615014	602124	635606	609083	451519	367862	619573	564914	639633	687090	746520	496766
Q00612	G6pdx	673716	512705	518029	556881	875490	572749	922717	1100000	983955	1040000	957882	968488	650283	1480000
Q00623	Apoa1	20700000	27400000	42900000	32100000	16200000	20100000	17300000	21100000	15700000	30600000	35300000	33400000	16900000	29100000
Q00724	Rbp4	718842	421635	894892	517632	988903	865196	1610000	1600000	1670000	1670000	1600000	1720000	1650000	2030000
Q00896	Serpina1c	19800000	17300000	26600000	15500000	34700000	26500000	51700000	33300000	42300000	36700000	52500000	42900000	34700000	49400000
Q00897	Serpina1d	60400000	66000000	57200000	71100000	57600000	52700000	79700000	110000000	80300000	125000000	91100000	69800000	58400000	48100000
Q00898	Serpina1e	5330000	3320000	3050000	3730000	3180000	3990000	6770000	3830000	5230000	8660000	6310000	3920000	3850000	5640000
Q00899	Yy1	383030	495940	316003	307044	288214	288496	107160	194933	248162	222859	290324	258951	274913	218882
Q00915	Rbp1	225971	521270	246423	486470	359549	236192	488457	339822	333497	593852	395575	284764	464584	772878
Q00PI9	Hnrnpul2	3460000	2980000	2990000	4210000	4350000	3920000	4030000	3710000	3370000	3030000	2800000	2710000	3310000	3200000
Q01147	Creb1	574037	764410	453620	492947	555813	829428	364215	364248	703120	680937	483006	770061	454504	677966
Q01149	Col1a2	2160000	6120000	2560000	6050000	2560000	6040000	2540000	1610000	2440000	4840000	3360000	3920000	3250000	3750000
Q01279	Egfr	7980000	4850000	4840000	5300000	6220000	6950000	6500000	7750000	8280000	6140000	6100000	5240000	6790000	5510000
Q01339	Apoh	18300000	18100000	11700000	14900000	13200000	13500000	13300000	18300000	17600000	13800000	10400000	11500000	11100000	12700000
Q01405	Sec23a	9870000	7460000	7520000	7190000	9850000	9990000	9730000	9810000	10300000	9200000	6100000	4600000	7520000	7000000
Q01514	Gbp1	NA	NA	NA	263006	NA	NA	278506	112482	NA	161779	NA	NA	NA	470300
Q01721	Gas1	209276	447383	156812	186489	138844	219564	NA	NA	118248	NA	NA	141672	NA	NA
Q01730	Rsu1	367182	546421	571748	575321	408219	330480	324286	296836	652050	700129	841380	525563	303521	507112
Q01768	Nme2	64300000	83500000	77600000	65300000	36500000	47000000	45900000	44600000	43200000	56900000	58000000	63900000	62100000	50400000
Q01853	Vcp	45200000	44000000	47300000	46500000	52000000	48800000	55100000	52900000	45200000	47000000	45100000	40100000	40900000	39400000
Q01965	Ly9	NA	NA	NA	NA	NA	NA	NA	NA	NA	NA	NA	NA	NA	NA
Q02013	Aqp1	180252	NA	NA	NA	232123	165667	341195	NA	261179	265856	NA	NA	NA	NA
Q02053	Uba1	8610000	8540000	7850000	8350000	11100000	8500000	11600000	12000000	9560000	9910000	9550000	8160000	8390000	9530000
Q02105	C1qc	NA	241587	NA	145228	NA	858029	NA	NA	NA	NA	NA	NA	513017	701105
Q02248	Ctnnb1	2300000	2160000	2700000	2030000	3410000	2590000	4100000	3470000	3960000	3660000	3100000	3500000	4260000	4140000
Q02257	Jup	996310	1160000	1740000	1220000	1460000	1200000	1680000	1730000	1560000	1740000	1770000	1620000	1370000	1360000
Q02357	Ank1	1710000	1050000	1430000	1500000	1770000	1460000	1530000	4580000	1720000	2070000	3220000	3620000	2070000	3770000
Q02614	Sap30bp	581549	520022	481519	387554	747921	510560	197037	627550	673309	608443	655684	635024	641288	662202
Q02780	Nfia	1140000	891679	923240	877346	1290000	954557	880172	1230000	1320000	1100000	941195	1160000	1030000	565353
Q02788	Col6a2	1780000	2800000	1910000	2280000	2650000	2960000	2210000	1810000	1720000	2870000	2000000	2090000	3690000	2950000
Q02819	Nucb1	6440000	4550000	6970000	5390000	7560000	5960000	7860000	8490000	7520000	8770000	7580000	6220000	5930000	7190000
Q03141	Mark3	503674	620164	595428	524010	560625	519335	236601	467895	540189	463980	603236	433936	500120	451423
Q03142	Fgfr4	NA	NA	NA	NA	NA	NA	132440	NA	NA	NA	NA	NA	NA	NA
Q03160	Grb7	641858	1110000	743418	912682	1000000	778676	809903	777594	680159	542063	772032	530200	545466	458835
Q03249	Galt	1110000	949140	1990000	1350000	1540000	1170000	1880000	1560000	1490000	2170000	2000000	1560000	1600000	1770000
Q03265	Atp5f1a	182000000	155000000	373000000	207000000	166000000	167000000	189000000	217000000	237000000	265000000	337000000	310000000	227000000	238000000
Q03311	Bche	562122	519706	511450	605724	558114	614127	690012	405444	496581	376972	232062	434284	291613	480278
Q03734	Serpina3m	NA	911551	701546	1020000	737924	408110	685576	985681	636754	543638	884174	NA	415518	343126
Q03958	Pfdn6	331873	340504	474257	529012	414756	259896	441976	411946	400488	409543	604954	561084	441538	350743
Q03963	Eif2ak2	904500	554174	830055	901067	667717	802798	831151	676861	605363	693689	567692	614178	595143	580431
Q04207	Rela	1320000	791889	1130000	847386	654475	864730	765151	1110000	690851	623189	881900	1120000	1050000	1040000
Q04447	Ckb	3300000	5020000	3880000	4200000	2720000	3520000	2930000	2530000	2800000	3180000	3070000	2870000	3480000	3070000
Q04519	Smpd1	501709	802651	966208	1200000	744897	737276	844994	839902	749088	798920	753449	874860	955271	933698
Q04736	Yes1	726395	378572	752779	572975	1380000	864209	91321.8	789794	1230000	784217	735413	937757	590712	947589
Q04750	Top1	7990000	7220000	6310000	6400000	6050000	7000000	6990000	6780000	7100000	5650000	5890000	6330000	7860000	7230000
Q04857	Col6a1	2030000	2910000	2480000	3160000	5530000	3460000	3410000	2190000	2990000	4960000	2160000	2550000	4010000	3490000
Q05117	Acp5	2160000	891219	1220000	771028	1530000	1190000	2040000	1980000	2370000	2000000	1940000	1910000	1900000	1580000
Q05144	Rac2	968556	950107	869121	1740000	989338	1320000	2050000	1350000	915505	2000000	883669	1440000	2090000	3940000
Q05186	Rcn1	200810	206903	453135	280208	300988	446243	444931	242347	380650	273643	499490	324089	366785	694821
Q05421	Cyp2e1	31500000	40600000	36900000	35800000	43500000	40600000	47300000	34500000	33100000	36300000	25400000	25600000	36100000	27300000
Q05512	Mark2	249936	198240	NA	NA	192408	120277	77905.3	164564	218002	196947	225601	125693	39489.2	50234.5
Q05685	Folr2	856963	850206	690452	878891	495726	740540	541565	484638	634562	616137	449086	345417	522808	455081
Q05793	Hspg2	8160000	9780000	6350000	7770000	8480000	8860000	8010000	8730000	9760000	8320000	7010000	7440000	9320000	10100000
Q05816	Fabp5	9580000	7570000	5870000	8990000	15200000	8580000	9530000	15700000	15700000	13000000	10400000	10800000	19800000	15900000
Q05915	Gch1	960178	987909	1270000	1360000	464048	666350	515374	972828	961970	1320000	1430000	942042	640645	825600
Q05920	Pc	66000000	54800000	68700000	63700000	76100000	72200000	80700000	93500000	99900000	82900000	86900000	87000000	83400000	90300000
Q05CL8	Larp7	677483	555417	560280	721547	528692	702002	817587	692324	639791	594352	685282	726526	862828	581352
Q05D44	Eif5b	4820000	3600000	3270000	4470000	3840000	4830000	4580000	3850000	3670000	3570000	3280000	3680000	3990000	3610000
Q06180	Ptpn2	321614	363843	510543	386959	638569	441587	393718	NA	531843	602011	747713	439286	460694	364822
Q06185	Atp5me	47600000	63200000	44400000	43400000	21900000	46800000	30000000	45100000	28200000	42900000	32000000	91100000	67300000	38800000
Q06335	Aplp2	71624.3	80479	44860.5	47848.4	117466	77598.9	123689	NA	72719.6	NA	NA	NA	NA	NA
Q06649	Sh3bp2	880876	820812	790519	823726	704911	937245	690225	784937	510344	568991	555527	742208	802764	1020000
Q06770	Serpina6	239556	879931	536574	697450	323606	674839	NA	885796	660002	634941	682605	1010000	554137	426678
Q06890	Clu	6760000	4980000	6370000	8170000	8130000	7290000	8850000	9470000	10400000	14800000	10400000	12700000	11700000	12900000
Q07076	Anxa7	2250000	3310000	5600000	2730000	3880000	2610000	4430000	3790000	2880000	3840000	5260000	4550000	3840000	5170000
Q07113	Igf2r	585642	549914	394254	576315	385719	494579	573134	415095	315099	226822	245447	422798	567845	422667
Q07133	H1-6	449919	NA	213186	539920	409724	626819	588284	245572	295364	NA	374130	758088	168893	625281
Q07235	Serpine2	520610	394445	384215	427716	305607	383428	421124	651326	472453	538415	614512	640343	749812	518204
Q07417	Acads	34300000	28900000	38700000	31500000	35200000	27100000	48000000	43200000	50100000	51200000	55700000	39100000	39200000	43600000
Q07456	Ambp	4880000	3280000	4080000	4120000	4220000	5450000	5380000	5060000	4720000	3470000	4400000	4360000	3930000	5950000
Q07797	Lgals3bp	3070000	1830000	1790000	2180000	1590000	2250000	2720000	2250000	2350000	1800000	1520000	1870000	2120000	3360000
Q07813	Bax	3390000	2460000	1870000	3460000	3470000	3130000	2860000	3240000	3220000	2430000	1840000	1920000	2700000	1950000
Q07968	F13b	700764	908181	457043	514314	731665	776075	791116	802662	767828	569497	662041	710192	437794	776526
Q08024	Cbfb	745361	898573	594278	637377	497052	474702	352504	727660	551948	699422	672886	418515	720345	410711
Q08091	Cnn1	NA	NA	NA	NA	NA	91439.1	NA	NA	NA	NA	NA	NA	NA	NA
Q08093	Cnn2	462624	584500	341684	249987	155249	236546	119906	235050	209527	210634	234259	241765	309665	302044
Q08288	Lyar	2050000	3560000	1570000	2290000	1070000	1680000	1460000	1110000	1250000	2450000	1430000	2310000	2400000	2010000
Q08481	Pecam1	635207	461550	265114	392269	502637	625898	493001	589395	526363	316243	355493	NA	371323	395644
Q08761	Pros1	263514	173562	177220	221161	188006	NA	175141	470567	304344	268393	274384	191233	281813	312090
Q08857	Cd36	792227	738714	976862	651849	2800000	1040000	901868	1070000	1270000	1060000	311036	498780	865467	782250
Q08879	Fbln1	1110000	924992	557991	824078	469675	824895	490556	576720	540002	211946	304803	461100	597504	633918
Q08943	Ssrp1	1200000	1450000	1060000	1140000	936426	1140000	1670000	666936	1310000	1350000	1060000	1060000	1170000	908185
Q09014	Ncf1	NA	NA	NA	NA	NA	NA	NA	NA	NA	NA	NA	NA	NA	NA
Q09200	B4galnt1	3160000	2980000	3360000	3270000	3250000	3650000	2850000	3480000	2150000	2740000	1740000	2470000	2710000	2580000
Q0GNC1	Inf2	242246	130290	337344	367577	403584	278165	368779	402792	384815	455489	491407	347219	394686	354568
Q0KL02	Trio	224952	NA	139084	91030.9	212248	203353	237322	318640	232488	242983	173722	244013	262959	137404
Q0P678	Zc3h18	1530000	824944	813225	636214	426119	530010	332862	872670	779217	741530	434349	386526	490182	394234
Q0VAV2	Exph5	843196	1470000	468221	1200000	575642	903293	686931	405789	827244	1200000	1090000	781092	879227	1220000
Q0VBD2	Mcm10	2320000	1890000	2540000	1380000	2060000	1720000	2350000	NA	2630000	3300000	3490000	3980000	2090000	2440000
Q0VBL3	Rbm15	3840000	4360000	3880000	4430000	3560000	4250000	2920000	4350000	3180000	3720000	3910000	4060000	4010000	3380000
Q0VEE6	Znf800	398992	511230	235402	484834	283667	534703	193971	266190	488111	333558	273654	397112	688678	347622
Q0VGB7	Ppp4r2	611226	356697	480758	451860	860740	681343	569866	992830	638835	524388	697011	534840	542909	264769
Q0VGY8	Tanc1	736911	695271	297013	518208	403978	438242	406668	307216	NA	NA	512082	551092	602879	644723
Q11011	Npepps	1380000	1450000	1570000	1700000	2020000	1490000	2180000	1620000	1770000	1580000	1720000	1520000	1510000	1220000
Q11136	Pepd	1780000	1820000	1730000	1680000	1550000	1760000	1700000	1850000	1370000	1610000	1470000	890412	1480000	1380000
Q148V7	Relch	390237	NA	230522	686293	314676	NA	349796	203367	297070	NA	NA	156196	279003	345474
Q148V8	Fam83h	1250000	1540000	1150000	947146	1080000	1160000	991513	1200000	985140	919550	950886	851812	1300000	1100000
Q149F3	Gspt2	186011	147976	NA	266321	286582	236852	265980	84945.6	318404	286731	279532	NA	248165	NA
Q149G0	NA	219192	239501	356717	326496	NA	335166	310596	155635	NA	225895	208726	242287	162336	154013
Q14AI6	Rpusd3	533038	453921	431728	303449	289352	376763	415303	586038	521001	598682	853339	692751	581971	622237
Q14AX6	Cdk12	353832	299345	275332	211343	335435	203026	234144	418277	250430	186534	208789	308771	415356	270717
Q14B01	Rnf113a2	355413	857431	374008	384817	315575	409885	259729	242356	288739	361485	333557	577319	437815	388831
Q14C51	Ptcd3	3040000	2210000	2350000	2350000	2460000	2550000	2680000	2570000	3220000	3260000	2790000	2390000	2740000	2270000
Q14CH1	Mocos	1190000	1490000	1360000	1460000	1850000	1510000	2060000	1040000	1130000	1430000	1110000	1020000	1340000	1720000
Q14CH7	Aars2	1090000	877747	1260000	1030000	1460000	1300000	1230000	1440000	1760000	1700000	1440000	1740000	1520000	2550000
Q14DH7	Acss3	1990000	1980000	1930000	2020000	3330000	1450000	2800000	2560000	2690000	2200000	2290000	2000000	1660000	2350000
Q19LI2	A1bg	NA	NA	NA	NA	NA	1330000	NA	NA	NA	NA	NA	1280000	NA	1020000
Q1ERP8	Cd300lg	1000000	1150000	1140000	1330000	1160000	1520000	583402	993859	1180000	1150000	1260000	1130000	1590000	1270000
Q1HFZ0	Nsun2	1330000	1290000	1330000	1260000	1490000	1150000	1540000	1320000	1460000	1430000	1480000	1310000	1270000	1300000
Q283N4	Urad	2220000	3350000	2040000	2450000	3360000	3100000	3160000	3580000	2760000	4230000	5710000	4840000	4160000	4130000
Q2EMV9	Parp14	722004	548306	768993	799693	743894	725648	816154	717365	938191	866735	586625	736451	523357	892365
Q2HXL6	Edem3	280352	721562	344270	444749	577349	475021	570688	434674	475953	739108	481830	338312	483054	915941
Q2KN98	Specc1l	476375	343145	683738	571153	771643	609008	376130	601401	551805	544169	663586	663117	724261	557771
Q2NL51	Gsk3a	162274	81319.8	209649	NA	220937	142719	156293	163356	101890	147639	98996.2	NA	NA	51379.4
Q2PFD7	Psd3	565014	508052	564244	552778	466690	549025	669066	528780	508449	523276	491119	593751	637244	694559
Q2TBA3	Malt1	NA	72769.8	65510.3	NA	NA	95403.4	241392	114509	256702	148158	176545	NA	133769	98882.3
Q2TBE6	Pi4k2a	847877	578019	521595	670978	681878	762475	420316	480904	714212	389878	487978	487777	412449	398326
Q2TPA8	Hsdl2	9280000	7070000	11000000	8330000	8790000	8270000	8940000	8170000	9510000	8710000	9930000	9960000	8740000	10500000
Q2VLH6	Cd163	800282	825498	746487	659004	777307	1040000	1470000	805451	1140000	877777	473147	346012	697732	553563
Q2YDW2	Msto1	NA	361279	414966	361722	315889	334397	298667	NA	NA	336530	NA	346083	268617	332636
Q32NY4	Cnnm3	148899	NA	109421	NA	102215	NA	NA	NA	103967	NA	NA	148924	NA	NA
Q3B7Z2	Osbp	3140000	2600000	2510000	2960000	3450000	3060000	3810000	3020000	3400000	3340000	3000000	3580000	3450000	3370000
Q3KNJ2	Nhej1	NA	NA	NA	NA	NA	NA	NA	NA	NA	NA	NA	NA	NA	NA
Q3KNM2	Marchf5	876093	867387	817051	1110000	808200	744452	1020000	900153	981957	1200000	835442	914752	NA	889303
Q3SXB8	Colec11	549240	773403	694512	801072	693426	606298	610803	553639	792396	477044	786633	1010000	636160	778355
Q3T9X0	Slc2a9	369139	602876	NA	421126	710703	593595	NA	926688	230661	NA	709315	589219	803671	542392
Q3TA38	Tmem120b	96280.9	NA	199411	NA	348393	182733	255069	105784	79627.9	184976	NA	135944	201190	124630
Q3TA59	Jmjd8	601759	362990	444089	773337	578490	588668	492072	487166	NA	471200	951817	NA	504384	NA
Q3TAQ9	Wdr36	749119	711948	458588	546935	582502	559884	595270	NA	1380000	673073	714712	451382	636778	618876
Q3TAS6	Emc10	2890000	1370000	1780000	1680000	3430000	3390000	3850000	3770000	2550000	3840000	2880000	2630000	2740000	2440000
Q3TB82	Plekhf1	1170000	1060000	891175	499326	1560000	1400000	1290000	532628	1650000	1180000	1160000	1260000	1320000	981404
Q3TBD2	Arhgap45	4050000	2520000	3100000	NA	1330000	2030000	1460000	1650000	2280000	1540000	2080000	2100000	1680000	2040000
Q3TBW2	Mrpl10	NA	NA	NA	NA	207191	NA	199836	NA	475385	182942	313250	NA	NA	138270
Q3TC33	Ccdc127	376389	304815	798134	346146	286284	278667	NA	430589	194334	412319	382162	430573	205444	331800
Q3TC46	Patl1	NA	NA	NA	NA	NA	NA	NA	NA	NA	NA	NA	NA	NA	NA
Q3TC72	Fahd2	2280000	2410000	3300000	2410000	1690000	1920000	1960000	1800000	1680000	2460000	2600000	2530000	2090000	1890000
Q3TC93	Hs1bp3	601471	786491	504357	553876	919655	566476	528223	513753	654483	623017	789343	644984	495081	607212
Q3TCH7	Cul4a	1530000	1190000	1260000	1280000	1350000	1720000	1670000	1510000	1440000	1300000	932628	1690000	1320000	1290000
Q3TCJ1	Abraxas2	3100000	3060000	2840000	2690000	3110000	3000000	2790000	4050000	2190000	2270000	2570000	2720000	2180000	2750000
Q3TCN2	Plbd2	845136	1440000	1570000	1320000	1210000	1330000	1690000	2230000	1360000	2610000	1320000	1810000	2270000	2130000
Q3TDD9	Ppp1r21	1420000	1200000	1420000	1200000	1600000	1450000	1620000	1290000	1470000	1540000	1490000	1790000	1510000	1370000
Q3TDN2	Faf2	3850000	3510000	3660000	3360000	3340000	2700000	3700000	3800000	3850000	3980000	3340000	2380000	2570000	2890000
Q3TDQ1	Stt3b	725647	658608	611615	583190	683497	806080	575485	573010	600426	500893	385569	409472	470640	486407
Q3TEA8	Hp1bp3	13100000	12500000	12800000	11600000	13500000	15800000	13900000	13000000	11200000	13100000	13300000	14700000	17300000	12900000
Q3TFK5	Gpatch4	420734	497356	363229	486119	216340	380139	264899	NA	310519	308094	264229	530463	626056	279222
Q3TFQ1	Spryd7	771494	1210000	660430	917742	778825	837945	856867	739384	743996	1060000	1240000	827625	746864	497115
Q3TGF2	Fam107b	599087	1240000	866236	1210000	462592	514209	437639	258661	372892	611896	458476	1020000	487532	1420000
Q3TGW2	Eepd1	553701	375494	406470	339023	483575	284687	436172	416017	362712	412719	378760	397748	290977	279540
Q3TH73	Ttyh2	466378	631874	472195	357282	333427	319153	202600	261880	199479	255947	270025	157876	NA	207485
Q3THE2	Myl12b	1900000	2780000	2050000	2710000	2020000	1550000	2190000	2980000	2260000	2400000	2010000	1170000	1520000	2240000
Q3THG9	Aarsd1	3470000	2980000	2610000	3250000	4380000	4130000	4540000	3580000	3780000	3230000	3750000	3580000	2810000	3050000
Q3THK3	Gtf2f1	850756	1120000	660469	671191	740874	727873	450514	572084	627462	679204	631925	663219	844107	492638
Q3THK7	Gmps	2600000	2000000	2640000	2130000	3090000	2430000	3420000	3100000	3420000	3170000	3270000	2390000	2630000	2920000
Q3THS6	Mat2a	6760000	6000000	6570000	5340000	6950000	6800000	7220000	7580000	8310000	7470000	7330000	7420000	6660000	8900000
Q3TIR1	Trappc13	NA	NA	NA	NA	207461	NA	117039	147355	NA	NA	NA	NA	141933	NA
Q3TIR3	Ric8a	574343	223368	545310	436623	764529	765064	629018	450536	586473	550231	401527	585763	623140	555272
Q3TIU4	Pde12	891446	897586	740039	705806	590874	624634	666178	590322	630716	429156	482913	590761	476805	517644
Q3TIV5	Zc3h15	2930000	2980000	2040000	2820000	1880000	3090000	2290000	2280000	1940000	2020000	1940000	1980000	2680000	1920000
Q3TIX9	Usp39	2550000	8490000	2210000	3750000	2230000	2550000	2140000	2990000	3550000	3200000	2070000	1560000	1460000	2890000
Q3TJ91	Llgl2	1250000	968786	1050000	1110000	1050000	1110000	1140000	1140000	905504	919155	910335	1100000	1160000	1080000
Q3TJD7	Pdlim7	427785	506545	384575	NA	517077	243801	293460	NA	519567	NA	624073	253292	188056	263301
Q3TJZ6	Fam98a	2130000	1270000	2450000	1900000	2050000	1970000	1850000	1530000	1960000	1900000	2360000	2130000	1880000	1640000
Q3TKT4	Smarca4	993136	822170	679207	1170000	1040000	1080000	1200000	1120000	1260000	799752	871687	828753	931444	1010000
Q3TKY6	Cwc27	1260000	840799	1050000	1120000	1180000	1450000	1250000	1840000	1180000	1510000	908056	1160000	1600000	1370000
Q3TL26	Tfb2m	119628	NA	262257	304181	NA	205954	308818	275455	416213	387391	382548	382944	287242	181304
Q3TL44	Nlrx1	591743	461806	707931	849587	764641	761235	668760	751615	756660	799094	645491	445480	550396	592606
Q3TLD5	Uri1	239118	216396	210281	116811	289372	261459	NA	304056	297972	325203	381113	289752	244152	222355
Q3TLH4	Prrc2c	1590000	2040000	1260000	1210000	1500000	1030000	894724	939884	1140000	1100000	1230000	1200000	1120000	898524
Q3TLP5	Echdc2	2320000	1580000	3750000	1240000	6380000	2710000	9410000	5000000	9240000	10900000	12600000	7510000	6010000	7630000
Q3TLS3	Gdpgp1	NA	62670.9	74252.1	NA	NA	68572.6	161243	NA	115141	195073	272138	157774	146883	156682
Q3TMH2	Scrn3	3180000	2800000	3220000	3880000	4170000	3520000	4200000	3140000	4090000	3430000	2620000	4000000	3180000	3270000
Q3TNA1	Xylb	11500000	8140000	10100000	12000000	10400000	11600000	14500000	12800000	10900000	9140000	10700000	8580000	9950000	10700000
Q3TPE9	Ankmy2	107811	NA	56392.8	139016	38249.5	NA	83702.2	NA	NA	NA	NA	67663.4	79127.8	NA
Q3TPX4	Exoc5	353308	NA	409083	362749	331842	285482	268659	227037	317771	409680	298922	271340	283329	250334
Q3TQB2	Foxred1	792342	517326	1270000	1020000	921683	1460000	1260000	1380000	1420000	1670000	1530000	1430000	1890000	1420000
Q3TQI7	NA	460777	885807	850188	421840	849393	420377	397735	656586	648364	555341	620065	681297	557385	439181
[truncated: 3,925 more rows]

## Sheet: Liver_DE
Uniprot ID	Gene Name	logFC	P.Value
P62743	AP2S1	-3.6801	0.0039
P63260	ACTG1	3.1161	0.0251
Q9CQW0	EMC6	-2.9419	0.002
A6ZI46	ALDOART1	-2.7434	0.0431
A9R9W0	MUP15	-2.5587	0.0209
Q61153	DIO1	-2.4722	0
P14602	HSPB1	2.4412	0
P16627	HSPA1L	2.4163	0.0018
Q99KU6	V3602	-2.381	0.0006
Q9WUA5	EPM2A	2.2682	0.0089
Q9D0J8	PTMS	-2.263	0.1183
P56400	GP1BB	2.2534	0.0006
Q5U4H9	NCOA4	-2.2276	0.0039
AMYS	V102	2.1159	0.0064
Q61390	CCT6B	-2.0244	0.0058
Q9CPX8	UQCR11	2.0101	0.0047
Q3UL36	ARGLU1	-1.9967	0.0276
Q60963	PLA2G7	1.985	0.0004
P15864	H1.2	-1.9566	0.0764
Q91WN2	TMEM150A	-1.9443	0.0003
Q80T14	FRAS1	-1.9424	0.0125
P47955	RPLP1	1.9399	0.0511
Q9R0A1	CLCN2	-1.9216	0
Q63836	SELENBP2	-1.8808	0.001
Q9Z1P8	ANGPTL4	1.8554	0
Q5QGU6	RTP3	-1.8196	0.0125
Q61036	PAK3	1.8106	0.0161
Q61462	CYBA	1.7753	0.0041
P62843	RPS15	-1.7708	0.0196
P56655	CYP2C38	-1.7251	0.0292
Q61301	CTNNA2	1.7197	0.0421
Q8K4F5	ABHD11	1.7179	0.0012
P60824	CIRBP	1.7021	0.0041
Q9CQU3	RER1	-1.682	0.0027
P83882	RPL36A	-1.6669	0.0167
Q9DCB8	ISCA2	1.6488	0.0121
Q99J56	DERL1	-1.6459	0.025
Q9JI08	BIN3	-1.6293	0.0026
Q8VDU5	SNRK	-1.6107	0.0022
Q3UC65	RSRP1	-1.6051	0.034
Q9DB60	PRXL2B	1.5899	0.0064
P58158	B3GAT3	1.582	0.0227
P02463	COL4A1	1.5775	0.0376
Q3TLP5	ECHDC2	1.5762	0.0089
A0A075B5N9	IGKV3.7	1.573	0.0559
Q91Y74	ST3GAL4	-1.5714	0.0024
Q8CGR7	UPP2	1.5689	0.0004
HBA	V249	-1.529	0.2598
P58021	TM9SF2	-1.5231	0.0324
Q8BH35	C8B	-1.5215	0.0182
Q9WV96	TIMM10B	1.5131	0.0004
Q9CPP0	NPM3	1.5099	0.0814
Q9D2C7	TMBIM6	-1.5095	0.0704
Q9CR13	FMC1	1.4948	0.0095
Q8BGB8	COQ4	1.4869	0.0639
Q9JKN1	SLC30A7	-1.4733	0.0004
P48428	TBCA	-1.4441	0.0089
Q99N42	TYMP	1.4401	0.0135
Q8BY89	SLC44A2	-1.4361	0.0112
Q8K4L0	DDX54	1.4293	0.0026
Q9DC16	ERGIC1	-1.4289	0.0033
Q99JR6	NMNAT3	1.412	0.006
Q9QWR8	NAGA	1.4116	0.0089
Q99PW4	TP53RKB	1.4112	0.0095
P26350	PTMA	-1.4101	0.2277
P51954	NEK1	1.4084	0.0137
Q62264	THRSP	-1.3934	0.0045
P08607	C4BPA	-1.3836	0.0002
P70424	ERBB2	1.3775	0.0596
O55042	SNCA	1.3763	0.0016
A0A571BD48	DNAH7B	-1.3724	0.021
Q91W34	RUSF1	-1.3701	0.0008
P61079	UBE2D3	1.3668	0.0117
Q566J8	COQ8B	1.3516	0.012
Q924M7	MPI	1.3441	0.0703
P18581	SLC7A2	1.3437	0.0006
Q9Z2J0	SLC23A1	-1.3268	0.0019
P97432	NBR1	-1.3147	0.0479
Q921I2	KLHDC4	-1.3135	0.022
O08717	INHBE	-1.3081	0.0093
E9Q2C0	CFAP46	1.3049	0.1007
P0C7L0	WIPF3	-1.3016	0.0162
Q921I0	ORMDL1	-1.2977	0.0287
A0A075B5R2	IGHV7.3	1.2844	0.0767
Q8VE38	OXNAD1	1.2815	0.0429
Q6P9N8	TRAK2	1.2807	0.0064
P97930	DTYMK	1.2747	0.0214
Q6PE15	ABHD10	1.2643	0.0095
Q9QXZ6	SLCO1A1	-1.2637	0.0001
S4R1W1	GM3839	-1.2624	0.021
Q91WP6	SERPINA3N	1.2506	0.0159
A2AS89	AGMAT	1.2408	0.002
Q9CPW9	METAP1D	1.2382	0.0004
O54962	BANF1	1.2328	0.0346
Q7TQK4	EXOSC3	-1.2287	0.0302
O88696	CLPP	1.2264	0.0031
P98086	C1QA	1.2257	0.0203
Q921V5	MGAT2	-1.2256	0.028
Q8K558	TREML1	1.2219	0.0007
A0A075B5P0	IGKV3.2	1.2183	0.0597
Q8BHS3	RBM22	1.2158	0.0023
O35969	GAMT	1.2155	0.0432
A2APV2	FMNL2	1.2125	0.1248
Q80W47	WIPI2	-1.2118	0.0132
P61290	PSME3	1.2095	0.0767
Q8R3G1	PPP1R8	1.2089	0.0262
Q6PHZ2	CAMK2D	1.2077	0.0768
Q9JIM1	SLC29A1	-1.2052	0.0101
Q71KT5	TM7SF2	-1.2015	0.0013
Q8R3Q0	SARAF	-1.2012	0.0002
P62075	TIMM13	1.1977	0.0007
Q9CQF3	NUDT21	1.1934	0.0148
Q8R5C5	ACTR1B	1.1919	0.0406
E9PYP1	CES1A	-1.1906	0.0739
Q8R3F5	MCAT	1.1887	0.0064
P01942	HBA	1.187	0.0015
A2AQ07	TUBB1	1.1863	0.0209
Q8BI08	MAL2	-1.1845	0.0023
Q9CW07	PPP1R3G	1.1823	0.0031
Q8K0B2	LMBRD1	1.1799	0.0714
Q8CHP8	PGP	1.1771	0.0273
P15327	BPGM	1.1758	0.004
O55239	NNMT	-1.1749	0.0019
Q9JIY7	NAT8	-1.1747	0.0082
Q9JM14	NT5C	1.1713	0.0694
Q9QZ06	TOLLIP	1.1711	0.0089
Q6P4S6	SIK3	-1.1674	0.1147
Q9D1L9	LAMTOR5	1.1652	0.0045
Q61696	HSPA1A	1.1631	0.0193
Q8VHQ9	ACOT11	-1.16	0.0021
P33622	APOC3	1.1572	0.0738
Q9Z2L6	MINPP1	1.1558	0.0795
Q9JKY0	CNOT9	1.1551	0.0737
Q8BK08	TMEM11	1.1523	0.0193
P50462	CSRP3	-1.1424	0.002
O88712	CTBP1	1.1375	0.0364
P62071	RRAS2	1.1314	0.1085
Q9Z2V4	PCK1	1.1312	0
Q8QZZ7	TPRKB	1.1303	0.0244
P70245	EBP	-1.1286	0.0013
P46978	STT3A	-1.1235	0.0003
A2ASQ1	AGRN	-1.122	0.002
A6H6A9	RABGAP1L	-1.1218	0.0109
Q8CIM3	D2HGDH	1.1201	0.0174
P51163	UROS	1.1199	0.0256
Q61205	PAFAH1B3	1.1183	0.0039
P29391	FTL1	1.1177	0.0002
Q9D8B3	CHMP4B	1.1129	0.0116
Q9R069	BCAM	1.1094	0.0144
Q9CQ89	CUTA	1.1081	0.0175
Q8BWM0	PTGES2	1.1056	0.2504
P19639	GSTM3	1.1032	0.0011
A0A571BF58	NEB	1.1014	0.0157
Q9R0Q9	MPDU1	-1.1006	0.0036
Q8R2Y8	PTRH2	1.1003	0.1067
Q91XD7	CRELD1	-1.0921	0.018
Q9CYV5	TMEM135	-1.0914	0.0002
Q8CAF4	NHSL1	-1.0896	0.0089
P09528	FTH1	1.0892	0.0004
E9Q137	TEX264	-1.0862	0.0001
P06339	H2.T23	-1.0858	0.0318
Q6NXN1	SZRD1	-1.0856	0.1126
Q9CR67	TMEM33	-1.0848	0.0011
Q64310	SURF4	-1.0838	0.0691
Q8R0N6	ADHFE1	1.0783	0.0149
Q9JKB3	YBX3	-1.077	0.0874
Q9CPQ3	TOMM22	1.0699	0.1794
Q6NXI6	RPRD2	-1.0677	0.0867
P42125	ECI1	1.0674	0.0002
A0A075B5R5	IGHV4.1	1.0663	0.0634
Q9DCG2	CD302	-1.0647	0.0002
P34884	MIF	1.0601	0.0002
P67778	PHB1	1.0583	0.0031
Q8K094	PVR	1.0559	0.1365
Q76M72	SLC22A27	-1.0536	0.0024
P04945	V564	1.0521	0.2235
Q3UHQ6	DOP1B	-1.0511	0.0453
Q8C2A2	TSEN54	1.049	0.1643
P62746	RHOB	-1.0482	0.0225
A2ADA5	PUSL1	1.043	0.0011
Q9DCC7	ISOC2B	1.0429	0.0164
Q8C7G5	APOA5	1.04	0.0113
A6H6J2	CYP2B13	-1.0399	0.0019
P70349	HINT1	-1.0398	0.1043
Q9ERF3	SKIC8	-1.0393	0.0445
Q9Z0H8	CLIP2	1.038	0.0374
S4R2K0	PDF	1.0365	0.0002
Q4VAA2	CDV3	-1.0338	0.022
Q80TM6	R3HDM2	1.0336	0.028
Q9CX98	CYP2U1	-1.0325	0.0013
Q8VDT9	MRPL50	1.0325	0.0002
P58802	TBC1D10A	1.0316	0.0135
A8DUK4	HBB.BS	1.0316	0.0031
Q60738	SLC30A1	-1.0314	0.1196
O89079	COPE	1.0284	0.0023
Q9CPX7	MRPS16	1.0281	0.1832
Q8BVE3	ATP6V1H	-1.0276	0.0613
O35657	NEU1	1.0245	0.0023
P10648	GSTA2	1.0243	0.003
Q8CIG3	KDM1B	-1.0214	0.0058
Q00724	RBP4	1.0211	0.0037
Q9D0M5	DYNLL2	-1.0199	0.0738
P97785	GFRA1	-1.0189	0.0205
Q02357	ANK1	1.0186	0.0026
Q91VW3	SH3BGRL3	1.0186	0.0653
P47877	IGFBP2	1.0183	0.0024
P50096	IMPDH1	1.0176	0.1434
O35683	NDUFA1	1.0175	0.0137
P97762	RP9	-1.017	0.022
Q9WUU9	MCM3AP	1.0141	0.1229
Q8R0Z6	ANGPTL6	1.0118	0.0535
A3KGB4	TBC1D8B	-1.0118	0.0186
Q91XE0	GLYAT	1.0109	0.0013
Q8R366	IGSF8	1.0092	0.0251
Q8CIL4	V2904	-1.0068	0.0472
Q61140	BCAR1	1.0041	0.0045
Q8BGI5	PEX26	-1.004	0.0019
Q8C7D2	CRBN	-1.0038	0.0031
P11438	LAMP1	-1.0032	0.1296
Q9DC63	FBXO3	-1.0005	0.0018
P97360	ETV6	-1.0002	0.0517
P28028	BRAF	0.9995	0.0641
A2AQ19	RTF1	-0.9972	0.0572
Q8BX09	RBBP5	0.9956	0.0659
Q9JK42	PDK2	0.9934	0.0307
Q9CWB7	V3841	0.9919	0.0125
Q8VCZ9	PRODH2	0.9887	0.0042
Q8CH72	TRIM32	0.9877	0.0904
Q9D1J3	SARNP	-0.9786	0.0196
Q9JIX0	ENY2	0.9783	0.0562
P70195	PSMB7	0.9781	0.0739
Q9DBI0	TMPRSS6	-0.9777	0.0014
P04104	KRT1	-0.9772	0.09
P26928	MST1	-0.9753	0.0146
P17563	SELENBP1	-0.9745	0.0006
Q3TH73	TTYH2	-0.9743	0.0127
ALBU.1	V101	-0.9724	0.2006
Q9CZN8	QRSL1	0.9723	0.0298
Q9DCY0	KEG1	0.9719	0.0006
Q8CGU1	CALCOCO1	0.971	0.0047
Q7TQI7	ABTB2	-0.9707	0.0161
Q80U38	KHNYN	-0.9645	0.0339
Q8BHC4	DCAKD	0.9627	0.0504
Q3UMR5	MCU	0.9624	0.0978
Q80UY1	CARNMT1	0.9619	0.0721
Q6ZWU9	RPS27	-0.9616	0.3032
Q8BGX2	TIMM29	0.9602	0.0241
P97821	CTSC	0.9576	0.0364
Q9JHU9	ISYNA1	-0.956	0.0721
Q61554	FBN1	-0.9551	0.1641
P01631	V536	0.9542	0.2755
Q8C3B8	RFT1	-0.9538	0.0712
P52503	NDUFS6	-0.9535	0.1051
Q8JZK9	HMGCS1	-0.9517	0.0002
A2AGH6	MED12	0.9509	0.1085
Q99PI5	LPIN2	0.9491	0.0002
O35728	CYP4A14	0.9482	0.001
P62274	RPS29	-0.9459	0.1044
Q99J23	GHDC	-0.942	0.0195
Q8K1E0	STX5	0.9381	0.0792
Q99KP3	CRYL1	0.9368	0.0173
Q9CZB0	SDHC	-0.9344	0.0174
Q5U4C3	SCAF1	-0.9338	0.0424
Q8VBZ3	CLPTM1	-0.9331	0.003
O35134	POLR1A	0.9295	0.0915
Q9Z2C5	MTM1	0.9295	0.0332
Q9Z2I8	SUCLG2	0.9287	0.0055
P15508	SPTB	0.9276	0.0026
Q3UHA3	SPG11	0.9274	0.0167
Q99N16	CYP4F3	-0.9271	0.0019
P46412	GPX3	0.9262	0.0312
P54071	IDH2	0.9256	0.0012
P09925	SURF1	0.9217	0.0329
Q9QXA5	LSM4	0.9212	0.0042
Q9Z2H5	EPB41L1	0.9207	0.0131
Q9CYN2	SPCS2	-0.919	0.1921
P18828	SDC1	-0.9185	0.1042
P60603	ROMO1	-0.9172	0.0805
Q9Z0P5	TWF2	0.9157	0.2523
Q9JM52	MINK1	-0.9143	0.0543
Q9D1R9	RPL34	-0.913	0.1798
P63028	TPT1	0.9081	0.0112
Q9WVL0	GSTZ1	0.9078	0.0237
O54967	TNK2	-0.9072	0.0792
E9PYD1	FAM98C	0.9067	0.1308
O35658	C1QBP	0.9061	0.0103
P70182	PIP5K1A	0.9026	0.0433
Q9QYR7	ACOT3	0.9017	0.0158
O08983	HPS1	0.9015	0.0018
A0A0A6YYE7	IGKV4.57	0.9009	0.1196
Q5FW57	GM4952	0.9008	0.0025
Q9D0S9	HINT2	0.8987	0.0022
Q8JZZ6	AMMECR1L	-0.8972	0.3634
Q9D0L7	ARMC10	-0.8963	0.0122
Q8BPT6	IMMP2L	0.8944	0.2622
Q61753	PHGDH	0.8917	0.0367
Q61133	GSTT2	0.8896	0.0013
K2C1	V254	-0.8893	0.0641
Q8K1X1	WDR11	-0.8873	0.0033
Q80SY4	MIB1	-0.8844	0.0725
P55065	PLTP	0.883	0.1192
O70309	ITGB5	-0.8793	0.0451
Q60715	P4HA1	-0.8791	0.2333
Q9JIY2	CBLL1	-0.878	0.2494
Q7TT18	ATF7IP	-0.8777	0.0141
Q9D187	CIAO2B	0.8752	0.0235
Q9D939	SULT1C2	0.8739	0.0299
Q8VC31	CCDC9	-0.8737	0.1491
Q91WM2	HDHD5	0.8737	0.0836
Q8CHY6	GATAD2A	-0.8707	0.008
Q63880	CES3A	-0.8703	0.0095
Q6XPS7	THA1	0.8696	0.0131
P03953	CFD	0.869	0.0375
Q9DBE8	ALG2	-0.8682	0.0306
P38060	HMGCL	0.865	0.0064
Q8C5L7	RBM34	0.8644	0.0365
P10107	ANXA1	0.8632	0.1233
A2AR02	PPIG	-0.8627	0.2746
P04919	SLC4A1	0.8621	0.0139
Q9CQT9	RAB5IF	-0.862	0.1885
P17095	HMGA1	-0.8596	0.2904
Q9CQF8	MRPL57	0.8595	0.0497
Q76LS9	MINDY1	-0.8594	0.0094
Q6GQS1	SLC25A23	0.8592	0.0761
Q6ZPR6	IBTK	0.8588	0.0064
Q9JJL3	SLCO1B2	-0.857	0.0146
P48410	ABCD1	-0.8568	0.1606
Q810U5	CCDC50	-0.8554	0.0045
Q9EP53	TSC1	0.8541	0.0251
P61514	RPL37A	-0.8536	0.0378
Q3TL26	TFB2M	0.8531	0.0322
P47964	RPL36	-0.8521	0.1229
Q8BMK0	CEP85	-0.8516	0.0196
P13634	CA1	0.8507	0.0215
Q9WV69	DMTN	0.8505	0.0375
Q9EPL8	IPO7	-0.8482	0.0013
P02104	HBB.Y	0.8466	0.0037
Q6A009	LTN1	-0.8457	0.0064
P97325	ST3GAL3	-0.8456	0.0123
Q99L43	CDS2	-0.845	0.0546
Q9WUR9	AK4	0.8441	0.0064
Q64337	SQSTM1	-0.8435	0.0002
Q5IRJ6	SLC30A9	0.8404	0.0922
Q60960	KPNA1	0.8392	0.0135
P97798	NEO1	-0.8366	0.0208
Q499X9	MARS2	0.8359	0.1067
P18528	V733	0.8343	0.1391
Q9D7X3	DUSP3	0.8333	0.0221
P59808	SASH1	-0.833	0.2167
Q9DCT8	CRIP2	-0.8319	0.0442
Q8C6I2	SDHAF2	0.8301	0.0443
Q9DCW4	ETFB	0.8296	0.0067
Q8BWP8	B4GAT1	-0.8293	0.147
P53798	FDFT1	-0.8292	0.0376
P51855	GSS	0.8271	0.0117
Q8VE10	NAA40	0.8262	0.1895
Q9Z0P4	PALM	-0.8258	0.1258
O88986	GCAT	0.825	0.001
Q6TEK5	VKORC1L1	-0.8249	0.2097
Q8BGM4	METTL27	0.8249	0.0836
Q8C092	TAF5	0.8241	0.0027
Q9Z2A9	GGT5	-0.824	0.1975
Q9WTQ8	TIMM23	0.8228	0.0215
Q9CR84	ATP5MC1	-0.8217	0.075
Q9JJW0	PXMP4	-0.8204	0.006
Q9D154	SERPINB1A	-0.8196	0.0071
Q8C5N3	CWC22	-0.8192	0.0641
Q9D7A8	ARMC1	0.8192	0.0152
Q6EDY6	CARMIL1	-0.8191	0.0221
Q9DCS3	MECR	0.819	0.0013
Q5QR91	GM11437	-0.8189	0.0578
P08680	ALAS2	0.8188	0.0961
Q75N73	SLC39A14	0.8183	0.3035
A0A075B5N3	IGKV8.28	0.8183	0.064
E9Q3L2	PI4KA	-0.8182	0.0999
Q8R3Y5	V3143	-0.8181	0.0281
Q9JLZ8	SIGIRR	-0.8161	0.001
P23506	PCMT1	0.8157	0.0208
Q99LD8	DDAH2	0.8156	0.1434
Q9CR24	NUDT8	0.8154	0.0483
Q8R1S9	SLC38A4	-0.8152	0.0017
Q3TA59	JMJD8	-0.8147	0.1551
Q9JHQ5	LZTFL1	0.8133	0.202
Q8BMQ2	GTF3C4	-0.8128	0.0306
Q8CHQ9	NAT8F2	-0.8126	0.0093
F6TQW2	IGHG2C	0.8112	0.1975
P13439	UMPS	0.8098	0.2326
P08032	SPTA1	0.8044	0.0095
Q6PB51	CCDC117	-0.8042	0.0429
Q9DAZ9	ZFYVE19	0.8021	0.0981
Q62165	DAG1	-0.8008	0.1212
E9Q7D5	ARHGEF5	-0.7981	0.0464
Q8K4Z3	NAXE	0.798	0.0096
Q3UDR8	YIPF3	-0.7958	0.0064
Q3V0K9	PLS1	0.7956	0.0897
P16045	LGALS1	-0.795	0.0122
P01844	IGLC2	0.7949	0.0095
Q6NSQ7	LTV1	-0.793	0.1732
P60334	CDO1	-0.7922	0.1601
Q91WL8	WWOX	-0.7887	0.0429
A2AIL4	NDUFAF6	0.7886	0.0156
Q9CPU2	NDUFB2	-0.7886	0.3261
Q80V94	AP4E1	-0.7879	0.0686
P98192	GNPAT	-0.7879	0.0132
Q8CFI5	PARS2	0.7873	0.014
Q06770	SERPINA6	0.7867	0.1871
Q91Z58	V3442	-0.7865	0.0681
O35435	DHODH	0.7865	0.0696
Q78XF5	OSTC	-0.7856	0.0137
Q8CGP0.Q9D2U9	H2BC26.H2BU2	0.7855	0.1388
P97386	LIG3	0.7853	0.0691
P62983	RPS27A	-0.7849	0.0091
Q9JKW0	ARL6IP1	-0.7848	0.0072
Q9CXI0	COQ5	0.7843	0.0495
Q80ZS3	MRPS26	0.784	0.0433
Q00896	SERPINA1C	0.7837	0.0175
A0A1Y7VJN6	IGHG3	0.7829	0.1213
Q8BU11	TOX4	-0.7821	0.1163
Q3UPH1	PRRC1	0.7814	0.0641
Q8K1A5	TMEM41B	-0.7813	0.0682
Q61151	PPP2R5E	-0.7791	0.0041
P28658	ATXN10	0.779	0.0631
Q9DAC7	TTC32	-0.7783	0.0422
P50544	ACADVL	0.7778	0.0008
Q6DFV3	ARHGAP21	-0.7776	0.1524
Q3U515	VWCE	-0.7771	0.2115
Q9CRB2	NHP2	0.7762	0.0151
Q8CCH2	NHLRC3	0.7752	0.0211
P46425	GSTP2	0.7752	0.0875
P17879	HSPA1B	0.7746	0.0013
Q8VCE2	GPN1	-0.7738	0.1409
Q8BWH0	SLC38A7	-0.7737	0.0085
Q9QVP9	PTK2B	-0.7732	0.0127
O88962	CYP8B1	-0.773	0.0012
Q924T2	MRPS2	0.7721	0.0235
G3X9Z4	PCF11	0.771	0.3179
Q3U829	AP5Z1	0.7699	0.0161
Q8VCH6	DHCR24	-0.7688	0.0215
P19157	GSTP1	0.7656	0.0045
O35704	SPTLC1	0.7645	0.1285
Q9CQF6	AASDHPPT	0.762	0.1601
CAS1	V137	0.7616	0.1137
O35459	ECH1	0.7603	0.0011
Q64446	ATP7B	-0.7601	0.0378
O35239	PTPN9	0.7582	0.1268
Q8R180	ERO1A	-0.7574	0.0229
Q9JLQ2	GIT2	-0.757	0.1382
Q8K1Y2	PRKD3	-0.7565	0.2122
Q4FK66	PRPF38A	-0.7564	0.0323
O35613	DAXX	0.7553	0.0393
Q99JY0	HADHB	0.7545	0.0038
Q9WUU8	TNIP1	-0.7537	0.0557
Q8QZY2	GLYCTK	0.7533	0.0035
Q99P27	PLA2G12B	-0.752	0.0805
Q9JKV1	ADRM1	-0.7514	0.0751
Q9CQW9	IFITM3	-0.7503	0.0133
P06909	CFH	-0.7499	0.0193
Q9CWP6	MOSPD2	-0.749	0.0021
Q91X97	NCALD	0.7473	0.0135
Q9QZ88	VPS29	-0.7469	0.1653
P28650	ADSS1	0.7446	0.0513
Q08879	FBLN1	-0.7445	0.0505
Q9CQU8	IMMP1L	0.7443	0.0684
Q9QYB8	ADD2	0.7441	0.2588
P81117	NUCB2	0.7425	0.0013
Q9JMG1	EDF1	-0.7418	0.0307
Q8R3I3	COG6	0.7412	0.1417
Q9CQW1	YKT6	0.7411	0.246
P29595	NEDD8	0.7409	0.0767
Q8R1M2	H2AJ	0.7382	0.0641
O09043	NAPSA	0.738	0.1631
Q9JLR9	HIGD1A	-0.738	0.3036
P43247	MSH2	0.7375	0.064
Q9EQ80	NIF3L1	0.7362	0.2151
O89020	AFM	0.7355	0.0004
Q8C142	LDLRAP1	0.7348	0.0237
Q5DU57	SPATA13	0.7348	0.04
Q66GT5	PTPMT1	0.7338	0.0643
P62267	RPS23	-0.7334	0.2697
Q8BMS4	COQ3	0.7329	0.0211
P00920	CA2	0.7313	0.0233
O35488	SLC27A2	-0.7309	0.0013
P97478	COQ7	-0.7306	0.4491
Q9CWY8	RNASEH2A	0.7295	0.0287
P50285	FMO1	-0.7293	0.0025
Q9DB25	ALG5	-0.7287	0.0013
P48962	SLC25A4	-0.728	0.0196
P18242	CTSD	0.7277	0.0002
Q7TSQ8	PDPR	0.7269	0.029
Q64735	CR1L	-0.7269	0.0192
P40936	INMT	-0.7264	0.0112
Q9CQ48	NUDCD2	0.726	0.0196
P06683	C9	-0.7256	0.0192
Q9JJZ6	KLF13	0.7248	0.144
Q9CWG8	NDUFAF7	0.7247	0.0305
A2A4P0	DHX8	-0.7245	0.0181
Q8C7V8	CCDC134	0.7243	0.1039
G3X982	AOX3	-0.7238	0.0002
P01639	IGKV9.120	0.7226	0.0424
O89051	ITM2B	-0.7212	0.1378
Q9D8P4	MRPL17	0.7209	0.0093
A0A0B4J1I0	IGKV1.110	0.7197	0.0405
Q3U1G5	ISG20L2	0.7188	0.174
P97801	SMN1	0.7176	0.0249
Q9JLV1	BAG3	-0.7169	0.0161
L7N466	MTHFSL	0.7164	0.0611
Q3UQA7	SELENOH	0.7163	0.1642
Q8CFA2	AMT	0.715	0.0006
P47915	RPL29	-0.7149	0.0389
P97287	MCL1	-0.7148	0.1398
Q91X51	GORASP1	-0.7142	0.0211
Q923Z3	MTO1	0.7129	0.1061
Q3UVK0	ERMP1	-0.7119	0.0344
Q6S9I3	KNG2	0.71	0.2208
Q8CCF0	PRPF31	0.71	0.0423
Q3URQ7	MTHFSD	-0.7084	0.1025
E9Q555	RNF213	-0.7083	0.0039
Q9WUK2	EIF4H	-0.7079	0.1365
Q9ET54	PALLD	-0.7075	0.0002
B5X0G2	MUP17	-0.7069	0.0931
Q6PHZ5	RBM15B	0.7052	0.1225
Q3UBG2	PID1	-0.7039	0.0091
Q9CQ91	NDUFA3	-0.7018	0.119
Q922Q9	CHID1	0.7014	0.1763
Q99N93	MRPL16	0.7013	0.0734
Q14AI6	RPUSD3	0.6999	0.0047
D3Z423	RNF212B	0.6988	0.0423
Q9CQJ6	DENR	-0.6985	0.2504
Q9EPK7	XPO7	-0.698	0.0026
O89023	TPP1	0.6979	0.0889
P22682	CBL	-0.6975	0.1277
Q9D1M0	SEC13	-0.6972	0.0155
Q5SGK3	AOX2	-0.697	0.4773
Q99L13	HIBADH	0.6964	0.0051
Q06890	CLU	0.6964	0.0013
Q4VAC9	PLEKHG3	0.696	0.2304
Q3U4I7	PYROXD2	0.6959	0.0237
Q922B1	MACROD1	-0.6958	0.0596
A0A0A6YXQ0	IGHV8.8	0.6957	0.0483
Q9DBG9	TAX1BP3	0.6953	0.188
Q6P7W5	TSEN2	0.6952	0.1393
Q924H7	WAC	0.6937	0.1973
P39876	TIMP3	0.6934	0.0136
O35972	MRPL23	0.6902	0.0692
Q8CFI2	CDC34	-0.6901	0.0221
Q8BTY8	SCFD2	0.6901	0.1434
Q8BK35	NOP53	0.6895	0.064
Q64105	SPR	0.6893	0.0063
Q3TQB2	FOXRED1	0.6889	0.0188
Q924Z4	CERS2	-0.6885	0.0132
P10922	H1.0	-0.6881	0.3022
Q9D820	PRORSD1	-0.6852	0.184
Q8K012	FNBP1L	-0.6848	0.0986
P14206	RPSA	0.6847	0.0157
E9Q1A5	ZFP384	0.6845	0.0262
Q8BYK6	YTHDF3	-0.6841	0.3077
Q8VE95	V3261	0.6825	0.02
P16015	CA3	-0.682	0.0148
Q8VDS4	RPRD1A	0.6817	0.1419
Q8R242	CTBS	0.6816	0.0188
Q99JW2	ACY1	0.6814	0.0127
Q9WVB0	RBPMS	0.6814	0.0556
O35930	GP1BA	0.6813	0.0973
Q7SIG6	ASAP2	-0.6802	0.1035
P97872	FMO5	-0.6796	0.0006
Q7TNE3	SPAG7	-0.6791	0.112
Q8C1E7	TMEM120A	-0.6774	0.0557
Q61171	PRDX2	0.6771	0.0041
Q80X71	TMEM106B	-0.6768	0.0021
G3X9Y6	AKR1C19	0.6765	0.0603
Q8VCF1	CANT1	0.676	0.2612
O35963	RAB33B	-0.676	0.0422
P58742	AAAS	0.6752	0.0342
Q9D7N3	MRPS9	0.6746	0.0379
Q8BNI4	DERL2	-0.6736	0.0411
P01837	IGKC	0.6733	0.0367
Q9D009	LIPT2	0.6732	0.1692
E9Q166	ATAD2B	-0.6724	0.1378
Q61823	PDCD4	0.6716	0.0113
Q9DBL2	GDAP2	0.6714	0.0684
Q61207	PSAP	-0.671	0.0195
O35864	COPS5	0.6703	0.2133
O89112	LANCL1	-0.6697	0.3279
K1C10	V252	-0.6691	0.1824
Q9DD03	RAB13	0.6688	0.3406
Q9CY34	UBE2F	-0.667	0.0302
Q8R1S0	COQ6	0.6669	0.0002
Q6PGB6	NAA50	0.6657	0.0013
Q6NVE9	PPTC7	0.6656	0.1525
A2A5R2	ARFGEF2	-0.6652	0.0015
P62073	TIMM10	-0.6647	0.2427
P20444	PRKCA	0.6641	0.0397
Q8K354	CBR3	0.6632	0.0499
P70175	DLG3	0.6628	0.2428
P20108	PRDX3	0.6624	0.0324
Q9DBH5	LMAN2	-0.6611	0.0058
O88544	COPS4	0.6605	0.0453
Q8BYL4	YARS2	0.6601	0.0714
Q9CWI3	BCCIP	0.6589	0.1716
P24063	ITGAL	0.6579	0.0114
Q9JHK5	PLEK	0.656	0.0923
Q99J39	MLYCD	0.6556	0.0064
Q9DBL7	COASY	0.6553	0.0208
Q8JZV7	AMDHD2	0.655	0.0048
Q64437	ADH7	-0.6549	0.4429
P60867	RPS20	-0.6534	0.3047
B2RY04	DOCK5	-0.6532	0.0211
Q60737	CSNK2A1	0.6531	0.2835
Q8BTS4	NUP54	0.6531	0.0739
P62869	ELOB	-0.6529	0.2869
O89086	RBM3	0.6528	0.0623
Q9D3U0	PUS10	0.6523	0.1424
Q62392	PHLDA1	0.6514	0.0646
P51175	PPOX	0.6499	0.0071
Q6PD03	PPP2R5A	-0.6498	0.0036
Q9CQ60	PGLS	0.649	0.0068
P97377	CDK2	0.6486	0.0782
Q91X52	DCXR	0.6479	0.0228
Q05816	FABP5	0.6479	0.0144
Q64505	CYP7A1	-0.6479	0.119
O35691	PNN	0.6476	0.0287
ALBU	V100	0.6472	0.0242
Q8R084	UGT2B1	-0.6468	0.0026
Q03311	BCHE	-0.6465	0.0162
O70378	EMC8	0.6464	0.1612
Q9D1M7	FKBP11	-0.6462	0.0061
P49290	EPX	-0.645	0.1832
Q9WVL2	STAT2	0.645	0.1645
Q63918	CAVIN2	0.6442	0.214
Q8K1B8	FERMT3	0.6438	0.0031
Q64669	NQO1	0.6435	0.0182
P53996	CNBP	-0.642	0.0539
Q9D945	LLPH	0.6419	0.2866
Q9D9H8	V4121	0.6412	0.0857
Q8BH69	SEPHS1	0.6409	0.1598
Q8K273	MMGT1	0.6408	0.0405
P59999	ARPC4	0.6407	0.0064
Q9D799	MTFMT	0.6407	0.128
P08030	APRT	0.6407	0.0262
Q08761	PROS1	0.6404	0.0393
Q80W54	ZMPSTE24	-0.6403	0.0155
O09110	MAP2K3	-0.6398	0.0027
O55137	ACOT1	0.6397	0.0376
P99025	GCHFR	0.6396	0.0091
Q9JK23	PSMG1	-0.6396	0.0185
Q60994	ADIPOQ	0.6391	0.0207
P58735	SLC26A1	-0.6378	0.0082
Q9WVJ2	PSMD13	0.6377	0.0242
O08966	SLC22A1	-0.6364	0.0058
P50429	ARSB	0.6363	0.0076
Q9D967	MDP1	0.636	0.0292
P28665	MUG1	0.6355	0.0013
P24721	ASGR2	-0.6341	0.0623
Q8BGS2	BOLA2	0.6341	0.0423
Q9R0X4	ACOT9	0.6339	0.0029
Q00612	G6PDX	0.6336	0.0135
Q5SSI6	UTP18	-0.6332	0.3345
Q9R062	GYG1	0.6326	0.0755
E9Q912	RAP1GDS1	0.6318	0.188
Q8R5A6	TBC1D22A	-0.6298	0.0661
Q6PGH2	JPT2	-0.6296	0.1223
Q8C1B7	SEPTIN11	-0.6295	0.2271
Q8VDS8	STX18	0.6291	0.1558
Q9WTP7	AK3	0.6276	0.005
P62748	HPCAL1	-0.6271	0.0691
Q924D0	RTN4IP1	0.6255	0.0251
O09172	GCLM	0.6252	0.0307
Q8BYM8	CARS2	0.6248	0.037
A2ATU0	DHTKD1	0.6241	0.1239
O35129	PHB2	0.6241	0.0734
Q8CIW5	TWNK	0.624	0.0325
O70293	GRK6	-0.6239	0.2437
D3Z7X0	ACAD12	0.6239	0.1424
Q0VGY8	TANC1	-0.622	0.2846
Q80VJ2	SRA1	-0.621	0.2569
Q9QXY9	PEX3	-0.6209	0.1611
Q3TLD5	URI1	0.6198	0.0413
Q8VCC1	HPGD	0.6196	0.0228
Q8VEE1	LMCD1	0.6194	0.0917
Q9QYI5	DNAJB2	-0.6187	0.0521
Q8K0D0	CDK17	0.6177	0.1023
O09159	MAN2B1	0.6172	0.0004
Q80XN0	BDH1	0.6171	0.009
O55091	IMPACT	-0.6169	0.0487
Q921H9	COA7	-0.616	0.0175
O54890	ITGB3	0.616	0.3074
Q9JKY7	CYP2D22	-0.6157	0.0017
P24668	M6PR	-0.6153	0.0194
Q9DCC4	PYCR3	0.6145	0.003
Q91WD5	NDUFS2	0.6143	0.0782
P57016	LAD1	-0.6131	0.04
Q9CXY9	PIGK	0.6128	0.111
Q920L1	FADS1	-0.6126	0.0089
P01635	IGKV12.41	0.6125	0.2948
Q9CXJ1	EARS2	0.6125	0.1852
P59108	CPNE2	0.6119	0.2026
Q922Q8	LRRC59	0.6114	0.0874
Q9JM76	ARPC3	0.6111	0.1672
A2AS37	AI182371	0.6107	0.125
Q9CPY1	MRPL51	0.6107	0.1039
Q921S7	MRPL37	0.6105	0.0031
Q91WE6	CDKAL1	-0.6103	0.0675
P20852	CYP2A5	0.6103	0.0033
P23780	GLB1	0.6102	0.0013
Q8BFP9	PDK1	0.6095	0.0125
Q9Z2L7	CRLF3	0.6094	0.1641
Q8R3Q2	PPP6R2	-0.6084	0.0513
Q9JMB0	GKAP1	-0.6082	0.1511
Q04736	YES1	0.6081	0.2904
P22315	FECH	0.6075	0.0323
P84089	ERH	0.6069	0.0127
Q8CHT3	INTS5	0.6066	0.1594
Q8R2M2	DNTTIP2	-0.6052	0.1424
Q9QUI0	RHOA	-0.6044	0.0337
Q6NZB0	DNAJC8	0.604	0.0248
Q8VE09	TTC39C	-0.6039	0.0019
Q8VDQ8	SIRT2	0.6038	0.0117
Q9CRB9	CHCHD3	-0.6037	0.0691
Q8CDN6	TXNL1	-0.6035	0.0099
Q9D115	ZNF706	-0.6031	0.0707
Q60967	PAPSS1	-0.6028	0.0341
Q9D958	SPCS1	-0.6027	0.022
P14106	C1QB	-0.6024	0.2979
Q8K2Y7	MRPL47	0.6018	0.0167
Q8K400	STXBP5	0.6012	0.271
Q61881	MCM7	0.6009	0.2437
Q9QZB9	DCTN5	-0.6007	0.0542
Q9ESZ8	GTF2I	0.6002	0.0936
Q9R061	NUBP2	0.5998	0.0528
Q9D4E6	PABPC6	-0.5984	0.1216
Q91XL1	LRG1	0.5979	0.0147
P23881	TCEA3	-0.5978	0.0091
A2AKK5	ACNAT1	-0.5978	0.0023
Q61792	LASP1	-0.5978	0.0844
Q6IEE6	TMEM132E	0.5976	0.1147
E9Q3R9	ZBTB21	-0.5975	0.2718
Q6P6I6	POLR2M	-0.5975	0.0646
Q8CHH9	SEPTIN8	0.5972	0.0318
P70290	MPP1	0.5971	0.0065
Q8CAK3	SHFL	-0.597	0.0961
P54116	STOM	0.597	0.0365
Q9CZ04	COPS7A	0.5967	0.2276
Q91WJ2	SLC22A26	0.5966	0.2326
Q8K1Z0	COQ9	0.5963	0.3235
Q8R1I1	UQCR10	0.5962	0.0034
Q9CZX7	PIP4P2	-0.5958	0.1745
P01642	GM10881	0.5952	0.2024
Q9D2R0	AACS	-0.5942	0.0012
Q9CR25	DPH2	0.5937	0.2755
Q91Z31	PTBP2	0.5932	0.0196
Q8R010	AIMP2	0.5932	0.0375
A2AWP8	ARHGEF10L	-0.5929	0.3226
Q8VCH7	RDH10	-0.5927	0.0099
Q6ZQI3	MLEC	-0.5925	0.0263
Q8CHP5	PYM1	-0.5922	0.2522
Q61235	SNTB2	0.5922	0.0093
Q91V64	ISOC1	0.592	0.0587
O08915	AIP	0.5918	0.0174
Q6ZPF4	FMNL3	0.5913	0.1425
P97328	KHK	-0.5912	0.0262
Q3UBX0	TMEM109	-0.5911	0.0406
E9Q8D0	DNAJC21	-0.591	0.0013
Q8BHG9	CGGBP1	0.5904	0.0704
Q60634	FLOT2	0.59	0.003
P55096	ABCD3	-0.5899	0.0146
Q14CH7	AARS2	0.5898	0.0064
Q9CY62	RNF181	-0.5897	0.0096
O70305	ATXN2	-0.5887	0.0598
Q8BPE4	TMEM177	-0.5883	0.0411
Q8BYJ6	TBC1D4	-0.5882	0.1156
Q9JJ89	CCDC86	-0.588	0.0251
Q99K67	AASS	0.5876	0.0039
Q7M6Y3	PICALM	0.5871	0.0672
A2A8U2	TMEM201	-0.5863	0.0342
P29699	AHSG	0.5863	0.0141
B2RT89.Q96LX3	SLC22A28.SLC22A30	-0.5862	0.0161
Q8R574	PRPSAP2	0.5861	0.0838
Q91XU3	PIP4K2C	0.5853	0.2327
Q8BH24	TM9SF4	-0.5853	0.0133
Q9CQZ5	NDUFA6	0.5851	0.039
P54751	ST3GAL1	-0.585	0.0739
Q8VCL2	SCO2	0.5844	0.0386
Q8K3W0	BABAM2	0.5844	0.3913
Q9CQE1	NIPSNAP3B	0.5837	0.1285
Q8BGF3	DNAAF10	-0.5831	0.0641
Q8VBV7	COPS8	0.5827	0.2115
Q05685	FOLR2	-0.5824	0.0189
O70570	PIGR	-0.5823	0.0095
P68134	ACTA1	0.5823	0.0436
Q9CZR8	TSFM	0.5821	0.0803
Q9D0F4	NKAP	-0.582	0.021
P17717	UGT2B17	-0.5814	0.0125
P15535	B4GALT1	-0.5811	0.0497
Q3UFT3	GAREM1	-0.5808	0.0721
P07724	ALB	0.5803	0.0091
Q9CQR4	ACOT13	0.5793	0.0242
Q9DC61	PMPCA	0.5789	0.0613
Q8BWT1	ACAA2	0.5786	0.0039
Q9DB20	ATP5PO	0.578	0.0175
Q99LB6	MAT2B	0.5776	0.0344
Q80X85	MRPS7	0.5772	0.0931
P18572	BSG	-0.5768	0.182
Q8K370	ACAD10	0.5761	0.0065
Q8K3K7	AGPAT2	-0.5758	0.0096
P16294	F9	-0.5755	0.0109
Q60953	PML	-0.5751	0.0325
Q9DCH4	EIF3F	0.5747	0.1085
P22599	SERPINA1B	0.5743	0.0946
P13516	SCD1	-0.5741	0.2272
Q9QXC1	FETUB	0.5736	0.0045
Q91YE3	EGLN1	-0.5736	0.0907
Q9DB77	UQCRC2	0.5726	0.0155
Q6P9R1	DDX51	-0.5726	0.1658
Q8VDD8	WASHC1	0.5722	0.0445
Q8CG76	AKR7A2	0.5721	0.0412
Q07113	IGF2R	-0.5718	0.0431
Q9CQ75	NDUFA2	0.5718	0.0641
Q9DCG9	TRMT112	-0.5717	0.3139
Q61735	CD47	-0.5717	0.3655
Q8CC86	NAPRT	0.5715	0.0104
Q99L27	GMPR2	0.571	0.0704
Q8C163	EXOG	0.571	0.0419
Q9Z0M5	LIPA	-0.5708	0.0365
Q9D0T1	SNU13	0.5705	0.0206
B1AQJ2	USP36	0.5694	0.2297
Q61838	PZP	0.5694	0.0013
Q8BMS1	HADHA	0.5688	0.0086
P31725	S100A9	0.5681	0.1862
Q8K0U4	HSPA12A	0.5679	0.4019
O88803	LECT2	-0.5675	0.1871
Q8R3C0	MCMBP	-0.5675	0.0762
Q91V81	RBM42	-0.5672	0.3196
Q80ZV0	RNASEH2B	-0.5671	0.1794
P40336	VPS26A	-0.567	0.0336
P40694	IGHMBP2	-0.5665	0.3047
O35593	PSMD14	0.5657	0.0422
Q68FL4	AHCYL2	-0.5655	0.0593
Q3UBZ5	MIF4GD	0.5651	0.1319
Q8BP74	PSTK	0.5651	0.1899
Q5SRX1	TOM1L2	0.5647	0.3915
Q8BPM2	MAP4K5	0.5644	0.1196
P35564	CANX	-0.564	0.0045
P15626	GSTM2	0.5628	0.0151
Q922E6	FASTKD2	0.5615	0.1031
P39098	MAN1A2	-0.5613	0.4384
P04441	CD74	-0.5611	0.233
Q8K2W3	TXNDC11	0.561	0.1295
Q91WK2	EIF3H	0.5605	0.1782
Q8R1K1	UBAC2	-0.5604	0.3228
P16330	CNP	0.5599	0.14
E9Q4Z2	ACACB	-0.5595	0.0083
Q8BZX4	SREK1	-0.559	0.2113
Q9D1P0	MRPL13	0.5589	0.0013
P97393	ARHGAP5	0.5587	0.0768
Q9CQV5	MRPS24	0.5585	0.0121
Q6NT99	DUSP23	0.5584	0.011
Q8BUR4	DOCK1	-0.5582	0.0461
Q5NCI0	URGCP	-0.5573	0.1079
Q9JKB1	UCHL3	0.5567	0.1179
Q61409	PDE3B	-0.5562	0.1502
P11499	HSP90AB1	-0.5562	0.0011
P62046	LRCH1	0.5558	0.1267
A0A0N4SUJ3	NAALADL2	-0.5548	0.0923
O88736	HSD17B7	-0.5541	0.022
Q791V5	MTCH2	-0.5537	0.0251
Q07235	SERPINE2	0.5532	0.0064
Q91VU7	PUS7	0.5526	0.1419
Q8BWJ3	PHKA2	-0.5523	0.0206
Q8JZZ0	UGT3A2	-0.5522	0.0128
Q9CR86	CARHSP1	0.552	0.2314
Q62219	TGFB1I1	0.5517	0.0634
Q9EQW7	KIF13A	-0.5516	0.539
Q6PHQ8	NAA35	-0.5508	0.0306
P53612	RABGGTB	-0.5508	0.0101
Q80XC2	TRMT61A	0.5506	0.14
Q8K385	FRRS1	0.5502	0.1362
Q80UP3	DGKZ	0.5497	0.2846
Q8C0D4	ARHGAP12	-0.5495	0.0659
Q99MZ3	MLXIPL	-0.5492	0.0543
Q921G6	LRCH4	0.5491	0.1275
Q8BFZ3	ACTBL2	-0.5489	0.31
Q8C1Y8	CCZ1	-0.5489	0.4477
Q9Z1Q2	ABHD16A	-0.5486	0.0064
Q8VEM8	SLC25A3	-0.5475	0.0315
P46414	CDKN1B	-0.5468	0.0746
Q9DB15	MRPL12	0.5464	0.0758
Q5SVR0	TBC1D9B	-0.5463	0.0376
Q6PB93	GALNT2	-0.5462	0.0354
P23492	PNP	0.5457	0.0162
Q8BI72	CDKN2AIP	-0.5454	0.2632
P82198	TGFBI	0.5443	0.085
Q64374	RGN	-0.5442	0.0023
P53986	SLC16A1	-0.5442	0.0489
P62880	GNB2	0.5441	0.0306
Q8BP40	ACP6	0.5438	0.0133
Q8R4R6	NUP35	0.5428	0.0948
Q6WKZ8	UBR2	-0.5427	0.3473
O88520	SHOC2	0.5424	0.1417
Q8K1J5	SDE2	0.5415	0.0351
Q9D964	GATM	0.5414	0.121
Q8VCN5	CTH	0.5411	0.032
P68510	YWHAH	0.5409	0.2767
Q9QZS5	SGK2	0.5401	0.3453
Q9WTP6	AK2	0.5395	0.0281
A0A075B5N4	IGKV8.27	0.5384	0.1331
Q9CQQ7	ATP5PB	0.5381	0.0125
Q91XE8	TMEM205	-0.5373	0.0196
Q8K3J1	NDUFS8	0.5368	0.0432
Q9JIK9	MRPS34	0.5364	0.0136
Q9WTX5	SKP1	-0.5361	0.1915
P06537	NR3C1	-0.5359	0.0866
Q8R216	SIRT4	0.5354	0.0761
P26952	IL3RA	0.5353	0.2855
Q99JY8	PLPP3	-0.5352	0.0669
Q9Z1K6	ARIH2	-0.535	0.1525
P55050	FABP2	-0.5349	0.0306
A2APT9	KLHDC7A	-0.5348	0.106
Q8BG30	NELFA	-0.5346	0.1528
Q7TMF3	NDUFA12	0.5335	0.0033
Q8BQ30	PPP1R18	0.5328	0.182
Q9JKF7	MRPL39	0.5322	0.0235
Q9CQ54	NDUFC2	0.5317	0.0322
Q91VX2	UBAP2	-0.5315	0.1092
D3Z2H9	TPM3.RS7	-0.5307	0.2217
Q9D0K2	OXCT1	0.5305	0.2309
HBB	V250	0.5304	0.5995
Q62172	RALBP1	-0.5303	0.0155
Q6PAQ4	REXO4	-0.5296	0.1505
Q8BJ05	ZC3H14	-0.5295	0.1275
P35441	THBS1	0.5294	0.0643
Q9Z2Y8	PLPBP	0.5292	0.0388
Q6P1H6	ANKLE2	-0.5288	0.0172
Q9DCJ5	NDUFA8	0.5287	0.0594
O89106	FHIT	0.5287	0.0325
Q8BPM0	DAAM1	0.5277	0.0284
Q64458	CYP2C29	-0.5274	0.0135
Q60866	PTER	0.5259	0.0195
P62631	EEF1A2	-0.5257	0.1611
P70268	PKN1	0.5257	0.2303
Q8BRH0	TMTC3	-0.5255	0.1165
Q3UGR5	HDHD2	0.5243	0.0639
Q8R0Y8	SLC25A42	0.524	0.0452
O70362	GPLD1	0.5239	0.0053
Q9CYI4	LUC7L	-0.5234	0.0089
Q9DB42	ZNF593	-0.5233	0.1293
Q9WUR2	ECI2	0.5232	0.011
P13020	GSN	0.5231	0.0148
P08122	COL4A2	-0.5228	0.0389
Q9CQR6	PPP6C	0.5226	0.0262
O08585	CLTA	-0.5222	0.1488
P97765	WBP2	-0.5222	0.2573
O55143	ATP2A2	-0.5219	0.0008
O35615	ZFPM1	-0.5217	0.0112
P62806	H4C16	0.5214	0.0399
Q9D8S3	ARFGAP3	-0.5214	0.035
P53395	DBT	0.5213	0.0295
P61406	SMG6	-0.5212	0.2559
Q8BX17	GEMIN5	-0.5211	0.0344
Q9CXL3	V3875	0.5208	0.2798
Q05117	ACP5	0.5195	0.0559
Q8CGC4	LSM14B	-0.5188	0.1396
Q91VM5	RBMXL1	0.5186	0.0556
Q5BL07	PEX1	-0.5184	0.0039
P70295	AUP1	0.5182	0.1512
P11680	CFP	0.5179	0.0539
Q02248	CTNNB1	0.5178	0.0161
Q5DU37	ZFYVE26	0.5178	0.235
F2Z3U3	RAPH1	-0.5177	0.0879
P63323	RPS12	-0.5174	0.0341
Q922H4	GMPPA	0.5172	0.1007
Q9CZY3	UBE2V1	-0.5169	0.1412
Q8BLY2	TARS3	-0.5167	0.1178
Q9QXB9	DRG2	-0.5163	0.096
Q9JKS5	HABP4	-0.516	0.1378
Q3UHH1	ZSWIM8	0.5158	0.1687
E9PV24	FGA	0.5156	0.0117
Q00898	SERPINA1E	0.5152	0.1396
Q8CIZ8	VWF	0.5148	0.1089
F6XJP7	PCSK6	-0.5146	0.034
Q9QZK7	DOK3	-0.5145	0.0661
Q9Z2A7	DGAT1	-0.5143	0.6372
Q8VI84	NOC3L	-0.5142	0.2103
Q6ZWY3	RPS27L	-0.5139	0.0174
P16110	LGALS3	0.5138	0.255
Q9D517	AGPAT3	-0.5137	0.0167
Q9Z126	PF4	0.5137	0.5114
Q60991	CYP7B1	-0.5133	0.0429
Q91W64	CYP2C70	-0.5133	0.0201
P12710	FABP1	-0.5128	0.2156
Q3TW96	UAP1L1	0.5123	0.0436
Q9R1P3	PSMB2	0.5122	0.0206
Q9EQK5	MVP	0.5119	0.0203
Q9ES52	INPP5D	0.5118	0.098
Q9D9K3	AVEN	-0.5114	0.2948
Q9D892	ITPA	0.5114	0.1275
Q91WK1	SPRYD4	0.5106	0.3657
Q9D8C4	IFI35	0.5106	0.1626
Q61646	HP	-0.51	0.1186
Q80YT7	PDE4DIP	-0.51	0.105
P50446	KRT6A	0.5096	0.6367
Q8BGR9	UBLCP1	-0.5095	0.1433
Q60631	GRB2	-0.5089	0.105
Q9JHS9	CWC15	-0.5088	0.1732
Q9D0Q7	MRPL45	0.5084	0.0706
A2AJ88	PNPLA7	0.5083	0.1111
P55258	RAB8A	0.5082	0.2081
Q9Z0R9	FADS2	-0.5082	0.0883
Q9CYF5	RCC1L	0.5077	0.2302
Q8C3F2	FAM120C	-0.5076	0.0149
Q8BG67	EFR3A	-0.5073	0.0064
O35609	SCAMP3	-0.5072	0.0157
Q8BHG1	NRDC	-0.5069	0.0058
P42703	LIFR	-0.5063	0.0239
O35490	BHMT	-0.5059	0.0086
Q811U4	MFN1	0.5058	0.0375
Q9D8X2	CCDC124	0.5057	0.0089
Q99J99	MPST	0.505	0.0244
Q5FWH6	ARHGEF15	0.5048	0.0365
Q9QZR0	RNF25	0.5047	0.1285
Q9CYR0	SSBP1	0.5046	0.4023
Q3TCN2	PLBD2	0.5045	0.0461
Q5SWD9	TSR1	-0.5043	0.0273
Q8BK48	CES2E	-0.504	0.0074
Q91VI7	RNH1	0.5036	0.0986
O08917	FLOT1	0.5032	0.0039
Q8BM55	TMEM214	-0.5024	0.0196
Q923B0	GGACT	0.5022	0.3399
Q8BVK9	SP110	-0.5018	0.246
Q60597	OGDH	0.5017	0.0109
Q9Z0K8	VNN1	0.5012	0.1701
Q8R2U6	NUDT4	-0.501	0.1716
P50396	GDI1	-0.5006	0.008
Q9CQ19	MYL9	0.5	0.2608
Q8R015	BLOC1S5	-0.4998	0.1574
Q9Z2Q5	MRPL40	0.4997	0.016
P62918	RPL8	-0.4996	0.2192
O35295	PURB	-0.4994	0.0125
Q8BKZ9	PDHX	0.4992	0.0469
Q91YJ3	THYN1	-0.4991	0.2023
Q9CY16	MRPS28	0.4986	0.0672
Q5FWK3	ARHGAP1	-0.4985	0.0943
Q7TN98	CPEB4	0.4984	0.2444
Q6QD59	BNIP1	0.4982	0.2277
Q3U3R4	LMF1	-0.4982	0.0135
Q8BYA0	TBCD	-0.4977	0.0215
Q9R092	HSD17B6	0.4976	0.022
O54754	AOX1	-0.4972	0.0093
P62281	RPS11	-0.4969	0.0657
Q9ER35	FN3K	0.4969	0.2904
Q91Z53	GRHPR	0.4968	0.1524
Q9R0T8	IKBKE	0.4961	0.1282
Q9D898	ARPC5L	0.4961	0.0853
Q8R4U7	LUZP1	-0.496	0.113
P21107	TPM3	0.4958	0.0585
P84104	SRSF3	-0.4954	0.0435
Q8K212	PACS1	0.4953	0.0322
A2AUP5	PFKFB3	-0.495	0.3273
Q3UUI3	THEM4	0.4949	0.0089
Q8R105	VPS37C	0.4943	0.2248
P45376	AKR1B1	0.4939	0.0065
Q8BK72	MRPS27	0.4939	0.0147
P48776	TDO2	-0.4938	0.005
Q9D1I6	MRPL14	0.4935	0.064
Q8BHC0	LYVE1	0.4934	0.3787
Q8VEJ9	VPS4A	0.493	0.0603
Q8C6B9	RPS19BP1	-0.4927	0.4705
Q99KI0	ACO2	0.4927	0.0144
Q99P30	NUDT7	-0.4926	0.0207
E9Q8B5	CFHR4	-0.4925	0.0209
Q9CXN7	PBLD2	0.4925	0.0112
Q9JJG0	TACC2	-0.4921	0.1434
P97792	CXADR	-0.4917	0.0306
P31651	SLC6A12	-0.4915	0.1079
Q91XD4	FTCD	0.491	0.0597
Q99LC3	NDUFA10	0.4908	0.1101
Q64378	FKBP5	-0.4906	0.0505
O70503	HSD17B12	-0.4905	0.0023
P35601	RFC1	-0.4904	0.1774
P29416	HEXA	0.4893	0.0452
O08997	ATOX1	0.489	0.0795
P55104	INHBC	-0.4889	0.137
Q8C025	CHPT1	-0.4887	0.022
Q61009	SCARB1	-0.4884	0.0981
P63321	RALA	0.4876	0.0377
O35099	MAP3K5	0.4876	0.3556
Q9CQR2	RPS21	0.4869	0.0187
O54825	BYSL	-0.4868	0.0739
Q9CW46	RAVER1	0.4861	0.1425
Q8BM75	ARID5B	0.4857	0.1513
Q8R1K4	PHYKPL	0.4857	0.3013
Q8VCA8	SCRN2	0.4857	0.0449
Q8BH55	THNSL1	0.4856	0.3347
Q8BUH7	RNF26	-0.4854	0.1434
B2RRE7	OTUD4	-0.4854	0.0217
Q2TBE6	PI4K2A	-0.4848	0.0429
Q9DBZ5	EIF3K	0.4847	0.1177
Q9CXT8	PMPCB	0.4846	0.0398
Q9Z2G6	SEL1L	-0.4846	0.0771
Q6P2L6	NSD3	0.4844	0.651
Q5SUF2	LUC7L3	-0.4842	0.1424
B1ART2	VPS13D	0.4839	0.2263
Q8K2T8	PAF1	-0.4838	0.1295
Q80YR4	ZNF598	-0.4838	0.1842
Q8C4J7	TBL3	-0.4837	0.1444
Q925F2	ESAM	0.4836	0.134
Q9EQ08	SGSH	-0.4825	0.4182
Q8K297	COLGALT1	0.4822	0.0346
Q922B9	ITPRID2	-0.4821	0.014
Q9R049	AMFR	-0.482	0.0071
Q8BH86	DGLUCY	0.482	0.0295
P49710	HCLS1	-0.4819	0.1551
Q03160	GRB7	-0.4817	0.0217
Q9DB26	PHYHD1	0.4815	0.021
P62320	SNRPD3	0.4812	0.0031
Q3TDQ1	STT3B	-0.4812	0.0128
Q8C5R2	PROSER2	-0.4812	0.1233
Q8JZM0	TFB1M	0.4811	0.3483
A0A5F8MPI9	RAPGEF1	0.4811	0.3497
P52825	CPT2	0.481	0.0112
Q8JZS0	LIN7A	0.4805	0.1308
Q9D172	GATD3	0.4801	0.0685
Q8VDI9	ALG9	-0.4799	0.4142
Q62433	NDRG1	-0.4794	0.075
Q8R3Q6	MIX23	0.4791	0.0402
Q3UN04	USP30	-0.4791	0.1275
O54749	CYP2J5	-0.4786	0.0022
Q9D662	SEC23B	-0.4785	0.0235
O35955	PSMB10	-0.4784	0.3475
Q8BJ64	CHDH	0.4783	0.0109
Q9CRC8	LRRC40	0.4782	0.1871
P62774	MTPN	0.4779	0.0135
Q8CGC6	RBM28	0.4779	0.5116
Q9Z1F9	UBA2	0.4779	0.0871
O08605	MKNK1	-0.4778	0.2192
Q80W21	GSTM7	0.4772	0.271
Q8BKC5	IPO5	-0.4772	0.0697
Q8R307	VPS18	-0.4766	0.125
P14094	ATP1B1	-0.4758	0.0156
Q3UKC1	TAX1BP1	0.4757	0.5114
Q9CQ62	DECR1	0.4752	0.0117
Q9CQC9	SAR1B	-0.4751	0.2257
Q91VA7	IDH3B	0.4747	0.0112
Q9WU60	ATRN	-0.4739	0.0795
O88958	GNPDA1	0.4733	0.4058
P29452	CASP1	0.473	0.0681
Q9R233	TAPBP	-0.4723	0.0862
Q9CXS4	CENPV	0.4719	0.021
O08967	CYTH3	0.4712	0.4324
Q9CSB4	PARD3B	-0.4712	0.0622
O08715	AKAP1	-0.471	0.0241
Q91W39	NCOA5	0.4709	0.1277
Q9D6R2	IDH3A	0.4709	0.0424
CATA	V139	0.4707	0.2897
Q9QXY6	EHD3	0.4703	0.0638
P70279	SURF6	0.4702	0.1337
Q91VK1	BZW2	-0.4695	0.0622
P0C0S6.Q3THW5	H2AZ1.H2AZ2	-0.4693	0.5158
Q8BZ32	ASXL2	0.4692	0.1412
P60670	NPLOC4	-0.4691	0.0031
Q8BK30	NDUFV3	-0.4688	0.5072
Q8VHH5	AGAP3	-0.4684	0.2878
P35123	USP4	-0.4682	0.0086
B8JK39	ITGA9	-0.4677	0.0646
Q9DBA6	TYSND1	-0.4676	0.012
Q9CPR1	RWDD4	-0.467	0.1388
E0CZ22	MROH1	-0.4661	0.0466
K9J7B2	UGT1A6B	-0.4653	0.0161
E9PVB5	TTC17	0.4648	0.341
Q9CZ83	MRPL55	-0.4646	0.2595
Q09200	B4GALNT1	-0.4645	0.0329
Q6PDN3	MYLK	-0.4642	0.009
A2CEK7.E9PVW0	MUP14.MUP8	-0.4641	0.1009
Q9JJ80	RPF2	-0.464	0.3277
Q8R151	ZNFX1	-0.4636	0.0086
Q91YI4	ARRB2	0.463	0.0641
Q8R0X7	SGPL1	-0.4627	0.014
Q99KI3	EMC3	-0.4622	0.1067
Q791T5	MTCH1	-0.4617	0.4265
Q9QXT0	CNPY2	-0.4613	0.0456
Q9QY93	DCTPP1	0.4608	0.2076
Q571F8	GLS2	0.4607	0.0431
Q8K1R7	NEK9	-0.4607	0.0139
Q64471	GSTT1	0.4606	0.1115
Q8BH44	CORO2B	0.4606	0.3303
Q3UM18	LSG1	-0.4599	0.0276
Q8BU31	RAP2C	-0.4594	0.1745
Q99N19	CYP4F13	-0.4585	0.0391
Q9CQY5	MAGT1	0.4583	0.3811
Q8R5I6	GSTM4	0.458	0.3194
Q922V4	PLRG1	0.4577	0.0526
P33267	CYP2F2	-0.4577	0.0245
P70168	KPNB1	0.4576	0.1266
Q283N4	URAD	0.4575	0.0623
Q8CAQ8	IMMT	0.4575	0.0392
Q9JKP7	POLE3	0.4573	0.0606
Q9QXX4	SLC25A13	0.4573	0.0249
Q4LDD4	ARAP1	-0.4571	0.0554
Q99LY9	NDUFS5	-0.4568	0.1427
Q8BJY1	PSMD5	0.4567	0.0259
Q921U8	SMTN	-0.4559	0.308
P62264	RPS14	-0.4558	0.2133
Q9DBP5	CMPK1	-0.4558	0.1427
Q8BG81	POLDIP3	-0.4557	0.1618
A0A668KLU9	CFHR2	-0.4556	0.4481
A3KMP2	TTC38	0.4556	0.064
P10649	GSTM1	0.4554	0.0196
P59114	PCIF1	0.4553	0.1385
Q7TMR0	PRCP	0.4551	0.1054
Q921M7	CYRIB	0.4548	0.407
Q9ERE7	MESD	-0.4543	0.1219
Q80U70	SUZ12	0.454	0.1546
Q8C0K5	SLC25A16	-0.4539	0.017
Q5RJ54	ZSCAN26	-0.4539	0.2869
P11859	AGT	0.4539	0.0639
Q8BG32	PSMD11	0.4537	0.132
Q8BGA5	KRR1	0.4535	0.0939
P52795	EFNB1	-0.4533	0.1525
Q8CH02	SUGP1	-0.4533	0.0905
A6H6E2	MMRN2	-0.4522	0.1455
Q9WTI7	MYO1C	0.4521	0.0161
Q9DC71	MRPS15	0.4519	0.1646
Q8BXB6	SLCO2B1	-0.4518	0.1505
Q9D6M3	SLC25A22	0.4515	0.0061
P35569	IRS1	-0.4514	0.2846
Q91WG2	RABEP2	-0.4513	0.3679
Q8CFI0	NEDD4L	-0.4503	0.0449
Q61578	FDXR	0.4499	0.0161
Q9JJH1	RNASE4	0.4497	0.0958
P51910	APOD	0.4495	0.2221
Q99KD5	UNC45A	0.4494	0.3343
Q8VI94	OASL1	-0.4488	0.0293
P56654	CYP2C37	-0.4485	0.0322
Q91WT7	AKR1C14	0.4483	0.0958
Q07417	ACADS	0.4483	0.0162
Q9WTL7	LYPLA2	0.4478	0.0936
Q99J62	RFC4	0.4477	0.2019
Q9D1I5	MCEE	0.4475	0.1179
Q8VE80	THOC3	0.4467	0.2276
P58281	OPA1	0.4465	0.0661
Q8R5L3	VPS39	0.4453	0.3002
Q8C729	HYCC2	-0.4453	0.1156
Q8K0E8	FGB	0.4451	0.026
Q923D1	ZFP61	-0.4442	0.1506
P62270	RPS18	0.4442	0.0935
Q8VCM3	ZFYVE21	-0.4442	0.0445
P50428	ARSA	0.444	0.1927
Q9CQP0	MRPL33	0.4435	0.0245
Q9DCM0	ETHE1	0.4435	0.0135
Q80X50	UBAP2L	-0.4426	0.1906
Q9D7G0	PRPS1	0.4425	0.2454
A2AT37	UPF2	-0.4424	0.2785
P04202	TGFB1	0.4423	0.3185
Q80TA9	EPG5	-0.4423	0.0605
Q3UIR3	DTX3L	-0.4419	0.0017
A0A0B4J1H7.A0A0B4J1H8	IGKV1.133.IGKV1.135	0.4417	0.2843
Q99PL6	UBXN6	-0.4417	0.0768
Q9QXM1	JMY	-0.4411	0.1482
Q60855	RIPK1	0.4409	0.3379
Q6PE01	SNRNP40	-0.4409	0.1419
Q9CZE3	RAB32	-0.4407	0.246
Q8BFR5	TUFM	0.4397	0.0125
Q9DAS9	GNG12	0.4396	0.0074
Q9JJK5	HERPUD1	0.4396	0.0849
Q91WL5	CYP4A12A	-0.4396	0.0142
Q9DBF7	CWC25	-0.4395	0.4305
Q8JZR0	ACSL5	-0.439	0.0089
Q5F2E7	NUFIP2	-0.4386	0.1448
Q9JJX6	P2RX4	-0.4385	0.3136
Q2VLH6	CD163	-0.4378	0.1655
Q9ERB0	SNAP29	-0.4368	0.0905
B1AUE5	PEX10	-0.4367	0.1433
Q9QYY0	GAB1	-0.4364	0.4285
P07214	SPARC	0.4359	0.2089
Q8K1H1	TDRD7	-0.4357	0.0496
P24270	CAT	-0.4356	0.0042
Q8VHE0	SEC63	-0.4355	0.0182
Q8BN21	VRK2	0.4353	0.3634
Q3TFK5	GPATCH4	-0.4351	0.4081
Q8K1C0	ANGEL2	0.435	0.2302
Q60759	GCDH	0.4345	0.0675
Q61599	ARHGDIB	0.4345	0.1517
Q9CZS1	ALDH1B1	0.4345	0.0721
Q64464	CYP3A13	-0.4343	0.0156
Q60680	CHUK	-0.434	0.4722
Q08481	PECAM1	-0.4339	0.2911
P15307	REL	-0.4337	0.1355
Q99P72	RTN4	-0.4337	0.253
Q6KCD5	NIPBL	-0.4335	0.086
Q4PJX1	ODR4	0.4331	0.2112
Q9Z0V7	TIMM17B	-0.4327	0.267
Q6PFR5	TRA2A	-0.4326	0.0556
A0A075B5M7	IGKV5.39	0.4326	0.5632
Q91XE9	CREB3L3	-0.4317	0.1215
P53808	PCTP	-0.4315	0.0768
Q8BTZ7	GMPPB	0.4314	0.0076
Q80ZK9	WDTC1	0.4312	0.0681
Q9D8H7	OMA1	-0.4308	0.1427
P49312	HNRNPA1	0.43	0.0227
Q9DB29	IAH1	0.43	0.1811
O35405	PLD3	0.4296	0.0748
Q9WV98	TIMM9	0.4295	0.2677
P50171	HSD17B8	0.4291	0.0294
O35215	DDT	0.4291	0.0451
Q8C6B0	METTL7A1	-0.429	0.1525
P06728	APOA4	0.4286	0.2088
Q9JJT0	RCL1	0.4286	0.3228
Q0KL02	TRIO	0.4286	0.1916
Q8R3N6	THOC1	-0.4282	0.1331
Q9JHE7	TSSC4	-0.4276	0.0795
Q6DYE8	ENPP3	-0.4272	0.1842
Q8BGC4	PTGR3	0.4264	0.0158
P58269	DPF3	0.4264	0.3199
Q91VJ5	PQBP1	-0.4264	0.2005
Q8VCD5	MED17	0.4258	0.1298
Q8BGS7	CEPT1	-0.4257	0.2038
B1AZP2	DLGAP4	-0.4253	0.3475
Q8CH18	CCAR1	-0.4252	0.1973
O70400	PDLIM1	0.425	0.0345
O35083	AGPAT1	-0.4249	0.1637
Q8K0C9	GMDS	0.4248	0.1571
P51174	ACADL	0.4247	0.0072
Q91YT7	YTHDF2	0.4246	0.511
Q9JIG8	PRAF2	-0.4246	0.1434
Q9CQV1	PAM16	0.4244	0.5062
Q9D8X1	CUTC	0.4243	0.171
P51658	HSD17B2	-0.4239	0.0405
Q9QZW0	ATP11C	-0.4237	0.0248
P97390	VPS45	0.4236	0.4061
Q61545	EWSR1	0.4235	0.0871
Q8CAY6	ACAT2	0.4235	0.0321
O08759	UBE3A	-0.4229	0.0465
Q9WVM8	AADAT	0.4226	0.0389
Q91Z49	FYTTD1	-0.4223	0.2193
Q80TH2	ERBIN	0.422	0.1496
Q9CQB5	CISD2	0.4219	0.443
Q0GNC1	INF2	0.4216	0.121
Q91ZX7	LRP1	-0.4214	0.0064
Q922Q1	MTARC2	-0.4212	0.0477
Q6VN19	RANBP10	-0.4211	0.0498
Q7TSH2	PHKB	-0.4211	0.1331
Q8R0G9	NUP133	0.421	0.4532
O08795	PRKCSH	-0.4208	0.0391
Q99JF5	MVD	-0.4207	0.0514
P54276	MSH6	0.4207	0.4773
Q9ESV0	DDX24	-0.4206	0.0217
Q9EPE9	ATP13A1	-0.4203	0.0449
P69566	RANBP9	-0.4202	0.0387
Q05144	RAC2	0.4194	0.3142
Q6R891	PPP1R9B	-0.4189	0.2739
Q9CZW4	ACSL3	0.4187	0.2307
Q8R081	HNRNPL	0.4187	0.064
E9QAP7	TAF4	-0.4186	0.2273
P70663	SPARCL1	0.4184	0.2207
Q9R1T2	SAE1	0.4182	0.1631
P52430	PON1	-0.4181	0.04
Q6RUT7	UQCC4	-0.418	0.2595
Q3UGS4	MCRIP1	-0.4177	0.084
Q8VD66	ABHD4	-0.4176	0.4412
Q9JKX6	NUDT5	-0.4174	0.0565
Q02614	SAP30BP	0.4173	0.1534
Q3UZA1	RCSD1	0.4167	0.1326
Q9D9I4	TBC1D20	-0.4163	0.1753
A0A075B5L0	IGKV10.95	0.4163	0.4506
Q9QY36	NAA10	-0.4161	0.1564
P62900	RPL31	0.4159	0.075
Q3TIX9	USP39	-0.4156	0.3166
Q9CPR5	MRPL15	0.4154	0.0142
P27546	MAP4	-0.4148	0.3278
Q9CZX9	EMC4	-0.4141	0.0704
P19096	FASN	-0.414	0.0569
Q9CRA8	EXOSC5	0.4138	0.0769
G5E870	TRIP12	-0.4137	0.2122
Q64339	ISG15	0.4135	0.4589
Q8R0A0	GTF2F2	0.4132	0.3167
Q9DD20	METTL7B	-0.4132	0.0508
D3Z0K6	RSBN1L	-0.413	0.2116
P58710	GULO	-0.413	0.028
Q9ERI6	RDH14	0.413	0.0358
O08914	FAAH	-0.4127	0.0237
Q9Z1E4	GYS1	-0.4126	0.1774
E9Q735	UBE4A	-0.4124	0.0202
E9PY03	TSTD1	0.4123	0.1525
Q9QYP6	AZI2	-0.4122	0.5289
P10639	TXN	-0.4121	0.1182
Q6P1F6	PPP2R2A	-0.412	0.0496
Q9D880	TIMM50	0.4119	0.0258
P61082	UBE2M	-0.4119	0.0641
Q3TIU4	PDE12	-0.4118	0.036
Q8C2E7	WASHC5	-0.4118	0.1973
Q3TGF2	FAM107B	-0.4116	0.4109
Q8R4Y4	STAB1	-0.4114	0.1112
Q8BFW7	LPP	-0.4114	0.2326
Q9D819	PPA1	-0.4113	0.0091
P47199	CRYZ	0.4113	0.0704
P62852	RPS25	-0.4109	0.2423
Q91X91	QPRT	0.4109	0.0386
Q9WV55	VAPA	0.4108	0.0215
G5E8P1	BRD1	0.4104	0.3179
Q9D9X6	ZSWIM2	-0.41	0.2613
Q9CQ26	STAMBP	-0.41	0.0322
E9PVA8	GCN1	-0.4096	0.0028
Q61830	MRC1	-0.4096	0.0443
Q505F5	LRRC47	0.4094	0.0659
Q9EQG9	CERT1	-0.4093	0.1299
Q8VC19	ALAS1	0.409	0.0911
Q91YH5	ATL3	-0.4085	0.1412
Q8K3X4	IRF2BPL	-0.4081	0.2354
P54227	STMN1	-0.408	0.3279
Q9DA08	SGF29	-0.4079	0.3196
Q9D7J9	ECHDC3	0.4074	0.2146
P49722	PSMA2	0.4074	0.1193
Q8C0Z1	FAM234A	0.4073	0.5875
Q8R1B4	EIF3C	-0.4071	0.0047
Q5F2F2	ABHD15	-0.407	0.255
Q8K5C8	RDH9	-0.4069	0.1962
P31750	AKT1	0.4066	0.5276
Q9Z0X1	AIFM1	0.4065	0.0383
Q9D0M1	PRPSAP1	0.4061	0.0603
P20060	HEXB	0.405	0.0488
Q9D8K8	SLC25A39	0.405	0.0875
Q03265	ATP5F1A	0.4046	0.0961
P49586	PCYT1A	0.4046	0.0323
Q3V1V3	ESF1	-0.4045	0.2055
Q9CQ06	MRPL24	0.4044	0.0443
Q62073	MAP3K7	-0.4043	0.3044
Q3UEP4	UGT2B36	-0.4042	0.0797
Q60649	CLPB	0.4039	0.031
Q61595	KTN1	0.4038	0.0306
Q8K3W3	CASC3	-0.4036	0.3441
Q8R4N0	CLYBL	0.4032	0.0196
Q8C0L0	TMX4	-0.403	0.2985
Q91VA0	ACSM1	0.4029	0.028
E9PWH2	CARD6	-0.4027	0.3199
A2BIM8.P02762.P04938	MUP11.MUP18.MUP6	-0.4026	0.0822
Q91W18	TDRD3	-0.4025	0.0843
Q99N94	MRPL9	0.4021	0.0893
Q80UU9	PGRMC2	-0.4021	0.0432
P00329	ADH1	-0.4019	0.0445
Q9CYW4	HDHD3	0.4015	0.1114
Q922S4	PDE2A	0.4015	0.2559
Q8K154	UGT2B34	-0.4011	0.0835
P14733	LMNB1	0.4011	0.1102
O35857	TIMM44	0.4008	0.0376
P23953	CES1C	0.4006	0.0411
P56593	CYP2A12	-0.4005	0.0358
Q60714	SLC27A1	0.4003	0.3945
Q3U7R1	ESYT1	0.4001	0.0948
Q6PCP5	MFF	0.4	0.2432
Q8R5K4	NOL6	-0.4	0.1193
Q9ET30	TM9SF3	-0.3998	0.0694
P46737	BRCC3	-0.399	0.0542
Q9WU42	NCOR2	-0.3989	0.1005
Q9ERR1	NDEL1	0.3988	0.3557
Q7TQH0	ATXN2L	-0.3987	0.1229
A6X919	DPY19L1	-0.3986	0.052
Q78J03	MSRB2	-0.3985	0.1866
Q9DC50	CROT	-0.398	0.0102
Q9D1E6	TBCB	-0.3979	0.0823
Q925I1	ATAD3	0.3976	0.0413
Q91V08	CLEC2D	-0.3971	0.0596
Q8JZU2	SLC25A1	0.397	0.1927
P05017	IGF1	-0.3968	0.1362
Q91Z40	GBP7	0.3964	0.392
Q9ET22	DPP7	0.3962	0.271
Q920Q8	IVNS1ABP	-0.396	0.1295
Q91X43	SH3D19	-0.3959	0.2715
Q8CJ53	TRIP10	0.3959	0.2515
Q7TNG5	EML2	-0.3952	0.0242
Q9D0G0	MRPS30	0.3951	0.0819
P49138	MAPKAPK2	-0.3949	0.1256
P07356	ANXA2	0.3945	0.2085
F8VPK0	TTC37	-0.3945	0.1985
Q8BWU8	ETNPPL	0.3943	0.0298
Q9QZN4	FBXO6	-0.3942	0.0443
Q8BL97	SRSF7	-0.3942	0.0426
Q91VS7	MGST1	-0.3941	0.064
Q9Z2W1	STK25	0.394	0.3043
O08807	PRDX4	0.394	0.0557
Q8N7N5	DCAF8	-0.3932	0.0489
Q60766	IRGM1	-0.3927	0.1541
Q5SX79	SHROOM1	-0.3927	0.4449
Q6P5G6	UBXN7	0.3921	0.2588
P28660	NCKAP1	-0.392	0.2569
Q5SWU9	ACACA	-0.392	0.0205
Q9CZ42	NAXD	0.3916	0.0392
P01869	IGHG1	0.3913	0.1277
Q6XVG2	CYP2C54	-0.391	0.0393
P11031	SUB1	0.3907	0.1777
Q8BWF0	ALDH5A1	0.3904	0.0351
Q6PDY2	ADO	0.3904	0.1658
Q9QXS8	CML5	-0.39	0.0691
Q99KH8	STK24	0.3899	0.0424
Q8R3N1	NOP14	-0.3898	0.3539
O88735	MAP7	-0.3896	0.2949
P08071	LTF	-0.3894	0.1479
P21550	ENO3	0.3892	0.4739
Q8VCT4	CES1D	-0.3891	0.0613
Q99PT1	ARHGDIA	0.3889	0.0392
Q9QZ23	NFU1	0.3887	0.0735
Q64726	AZGP1	0.3886	0.0131
A0A075B5V1	IGHV1.31	-0.3886	0.4748
P11725	OTC	0.3882	0.0147
Q9Z223	MOCS2	0.3878	0.3937
Q7TMQ7	WDR91	-0.3874	0.0278
Q924D1	CYP2J9	-0.3873	0.3696
O08600	ENDOG	0.3872	0.0661
Q9DCV4	RMDN1	0.3872	0.09
O70370	CTSS	-0.387	0.1505
Q06335	APLP2	0.387	0.1764
Q9CPT4	MYDGF	-0.3868	0.2119
Q9D7A6	SRP19	-0.3868	0.0856
Q8BG05	HNRNPA3	0.3867	0.0221
P80314	CCT2	0.3854	0.1361
Q8VE37	RCC1	0.3853	0.1023
Q9R008	MVK	0.3849	0.3051
Q9JK81	MYG1	0.3847	0.0432
Q8QZS1	HIBCH	0.3846	0.0805
Q9D4H9	PHF14	-0.3845	0.1491
Q9Z2X1	HNRNPF	0.3841	0.0936
Q61102	ABCB7	0.3838	0.0623
Q9JK83	PARD6B	0.3838	0.0556
Q91VE0	SLC27A4	-0.3837	0.0593
O08529	CAPN2	-0.3836	0.0737
Q99M31	HSPA14	0.3834	0.0967
Q924C1	XPO5	0.3832	0.3737
P14211	CALR	-0.3832	0.0393
Q60974	NCOR1	-0.3829	0.1279
Q9CWK8	SNX2	0.3829	0.0128
Q8CFJ7	SLC25A45	-0.3828	0.1707
Q8BL66	EEA1	0.3824	0.0422
P62835	RAP1A	-0.3823	0.0907
P70404	IDH3G	0.3815	0.0641
Q05920	PC	0.3812	0.0089
Q8BWR2	PITHD1	0.3811	0.0714
P58059	MRPS21	0.381	0.369
F6Z9B9	CES2H	-0.3807	0.4806
Q91YE6	IPO9	-0.3805	0.1215
Q9D0M3	CYC1	0.3804	0.1196
Q91X77	CYP2C50	-0.3804	0.0406
Q9Z2I9	SUCLA2	0.3802	0.0189
Q8VC97	UPB1	0.3802	0.0603
P39039	MBL1	0.38	0.246
P07759	SERPINA3K	0.3799	0.0193
P07742	RRM1	0.3797	0.4529
Q5EBG8	V1798	-0.3795	0.26
Q62393	TPD52	-0.3795	0.2217
Q9CQN6	TMEM14C	-0.3792	0.171
Q69ZN7	MYOF	0.3791	0.2563
Q8CI78	RMND1	-0.3787	0.0971
P54103	DNAJC2	-0.3783	0.0735
P52840	SULT1A1	0.3782	0.0967
Q9DC69	NDUFA9	0.3781	0.0521
Q9QXD8	LIMD1	-0.3778	0.1409
P54869	HMGCS2	0.3777	0.0306
Q8R059	GALE	0.3777	0.1336
D3YUP5	EXOC3L2	0.3774	0.0841
Q9D162	CCDC167	-0.3773	0.3434
Q8BGD8	COA6	-0.3772	0.2853
Q9EQH2	ERAP1	-0.3767	0.0508
Q63886	UGT1A1	-0.3767	0.0542
Q78IK2	ATP5MK	-0.3765	0.2911
Q3V3Q7	PACS2	0.3761	0.3387
Q9CQ10	CHMP3	0.376	0.0819
Q91WK0	LRRFIP2	0.376	0.0322
O55126	NIPSNAP2	0.3758	0.4449
O35344	KPNA3	-0.3757	0.2595
Q91VT4	CBR4	0.3757	0.021
Q9CZ13	UQCRC1	0.3757	0.0483
P62141	PPP1CB	-0.3755	0.239
Q9WUZ9	ENTPD5	-0.3752	0.1326
Q9D0B5	TSTD3	-0.3752	0.2715
Q8C7X2	EMC1	-0.3746	0.1069
P62908	RPS3	0.3746	0.0197
Q69ZX8	ABLIM3	0.3745	0.0737
Q6ZPJ3	UBE2O	0.3742	0.1258
P22892	AP1G1	-0.3739	0.0208
P03958	ADA	0.3735	0.0325
Q3ULD5	MCCC2	0.3726	0.032
Q9JK38	GNPNAT1	0.3726	0.1538
Q91VC3	EIF4A3	0.3726	0.1434
Q8BTI8	SRRM2	-0.3723	0.0161
O88908	SOAT2	0.3721	0.1051
Q61598	GDI2	-0.3719	0.0135
Q9D1G5	LRRC57	0.3712	0.3451
P52623	UCK1	-0.3711	0.1182
P48193	EPB41	0.371	0.0281
P60762	MORF4L1	-0.3704	0.3177
Q9D8B4	NDUFA11	-0.3702	0.0503
Q8C079	STRIP1	0.3701	0.3491
Q9CR59	GADD45GIP1	0.3701	0.04
P63038	HSPD1	0.3699	0.0489
P08228	SOD1	-0.3698	0.1852
Q8BMA6	SRP68	-0.3696	0.0641
P21619	LMNB2	0.3689	0.0323
Q6PEE2	CTIF	-0.3688	0.4619
Q61112	SDF4	0.3687	0.1011
Q921N6	DDX27	-0.3687	0.0445
P99029	PRDX5	0.3681	0.0276
P32020	SCP2	-0.3678	0.0298
B1AUN2	EIF2B3	-0.3676	0.02
Q8C6K9	COL6A6	-0.3676	0.2677
Q80TP3	UBR5	-0.3673	0.3556
Q9WU56	PUS1	0.3672	0.4111
P21180	C2	-0.3667	0.1401
Q3UMU9	HDGFL2	-0.3666	0.2344
Q3UIA2	ARHGAP17	0.3663	0.2682
P46656	FDX1	0.3662	0.2097
Q9CR47	NSA2	0.3657	0.6221
P56480	ATP5F1B	0.3655	0.0746
Q8BIP0	DARS2	0.3654	0.0253
Q62086	PON2	-0.3653	0.0692
P28798	GRN	0.3652	0.3438
Q61206	PAFAH1B2	0.3652	0.4151
Q3UYI5	RGL3	-0.3651	0.0215
Q60875	ARHGEF2	0.3651	0.2584
Q6PIJ4	NFRKB	-0.3649	0.3334
Q9WU40	LEMD3	-0.3647	0.1488
P29788	VTN	-0.3644	0.0696
A2AWA9	RABGAP1	-0.3644	0.4045
Q08857	CD36	-0.3643	0.4115
Q3U6U5	GTPBP6	0.3643	0.5116
Q80WJ7	MTDH	-0.3636	0.1388
P16125	LDHB	0.3634	0.3727
Q8BHD8	PCMTD2	0.3629	0.4905
Q8BFY9	TNPO1	-0.3628	0.0409
Q9ES00	UBE4B	-0.3628	0.1308
Q91WN1	DNAJC9	-0.3626	0.1365
O35988	SDC4	-0.3625	0.2569
Q9JLF6	TGM1	0.3625	0.2704
Q8R164	BPHL	0.3623	0.1519
Q5SW19	CLUH	-0.3623	0.0161
Q9Z0H3	SMARCB1	0.3622	0.0479
O35841	API5	0.3621	0.033
O35639	ANXA3	0.3619	0.0411
P28352	APEX1	-0.3618	0.1355
P85094	ISOC2A	0.3617	0.1401
Q4PZA2	ECE1	-0.3615	0.2304
Q9CZ28	SNF8	-0.3615	0.514
Q9D0E3	LYSMD1	-0.3611	0.2952
O88271	CFDP1	-0.3606	0.2208
Q571K4	TAB3	-0.3606	0.1275
Q9DCD5	TJAP1	0.3602	0.7114
Q8R5C8	ZMYND11	-0.3598	0.4985
Q91WS4	BHMT2	-0.3594	0.5135
Q69Z38	PEAK1	-0.3589	0.1601
Q9CQF0	MRPL11	0.3587	0.1685
Q3TWW8	SRSF6	-0.3587	0.2639
P70236	MAP2K6	-0.3585	0.3908
Q8K1J6	TRNT1	0.3581	0.0691
P12265	GUSB	0.3579	0.0226
P24456	CYP2D10	-0.3578	0.0309
Q9Z1A1	TFG	-0.3577	0.1876
Q9CQC7	NDUFB4	0.3573	0.1235
Q9Z2G9	HTATIP2	0.3569	0.0731
P60766	CDC42	-0.3568	0.2221
P83741	WNK1	-0.3567	0.1192
P97789	XRN1	-0.3565	0.1922
P42225	STAT1	-0.3564	0.1954
Q9WV85	NME3	0.3557	0.0514
O09106	HDAC1	-0.3557	0.2897
P62331	ARF6	0.3549	0.2247
P54254	ATXN1	-0.3546	0.2454
Q5H8C4	VPS13A	-0.3545	0.3277
Q8VIM9	IRGQ	0.3541	0.2897
Q9DBR0	AKAP8	-0.354	0.6069
Q8BWW4	LARP4	-0.3535	0.137
Q8K4H1	AFMID	-0.3534	0.1062
Q62093	SRSF2	-0.3531	0.0975
P70398	USP9X	-0.3526	0.0135
Q64523.Q6GSS7	H2AC20.HIST2H2AA2	0.3522	0.3095
Q8K0D2	HABP2	-0.352	0.3569
Q8BH43	WASF2	0.3519	0.1608
Q6PDM2	SRSF1	-0.3519	0.0856
P41216	ACSL1	-0.3516	0.0201
Q91V76	V3298	0.3515	0.0847
Q9EQI8	MRPL46	0.3515	0.2899
P17427	AP2A2	-0.3514	0.0158
Q8C1B1	CAMSAP2	0.3514	0.4781
P60229	EIF3E	-0.3512	0.0235
A0A140LIS8	GM4756	-0.3511	0.381
Q9CRC3	V3824	-0.3511	0.6856
Q99LG0	USP16	-0.3511	0.0923
O88451	RDH7	-0.3509	0.0693
P83887	TUBG1	-0.3508	0.2715
Q6PAV2	HERC4	-0.3508	0.0822
Q3UIU2	NDUFB6	0.3507	0.1183
Q80TR8	DCAF1	0.3505	0.1032
P12791	CYP2B10	-0.3501	0.2344
Q03963	EIF2AK2	-0.3501	0.0324
P24472	GSTA4	0.3498	0.079
Q9DBJ3	BAIAP2L1	0.3498	0.0593
E9Q842	NAV2	-0.3498	0.255
P61961	UFM1	0.3497	0.2116
Q80UM3	NAA15	-0.3495	0.0207
Q9JIG7	CCDC22	0.3494	0.1109
Q9CR68	UQCRFS1	0.3493	0.0596
Q5SUR0	PFAS	0.3492	0.0117
Q8CAS9	PARP9	-0.3492	0.0489
Q91X96	RABIF	-0.349	0.271
Q3UPH7	ARHGEF40	0.3489	0.1409
Q9D5V6	SYAP1	-0.3488	0.111
P30416	FKBP4	-0.3487	0.0155
Q99M71	EPDR1	-0.3487	0.6015
E9PYH6	SETD1A	-0.3486	0.3869
Q9DB27	MCTS1	0.3484	0.2423
Q9JIA7	SPHK2	0.3483	0.0721
Q9CQF4	MTRES1	0.3483	0.0593
Q99LX5	MMTAG2	-0.3478	0.3271
Q9D0R2	TARS1	-0.3478	0.0089
Q91WV0	DR1	0.3477	0.2537
Q6P1E1	ZMIZ1	0.3477	0.5128
Q9EST5	ANP32B	-0.3475	0.2133
O55060	TPMT	-0.3472	0.0447
Q99LD4	GPS1	0.3472	0.2779
Q3U9N9	SLC16A10	0.347	0.3418
Q9CWH5	TRMT11	0.3469	0.3047
P05063	ALDOC	0.3468	0.2767
Q8BU30	IARS1	-0.3463	0.0234
P35980	RPL18	-0.3461	0.3568
Q9JLJ4	ELOVL2	0.346	0.4691
Q00897	SERPINA1D	0.3459	0.1822
Q64FW2	RETSAT	0.3459	0.0796
Q8K0C4	CYP51A1	-0.3458	0.0693
Q8CG72	ADPRS	0.3458	0.0795
Q8VCR7	ABHD14B	0.3452	0.0485
A0A075B5K2	IGKV9.124	0.3452	0.3139
Q8CIM7	CYP2D26	-0.3451	0.0235
Q9Z222	B3GNT2	-0.345	0.3273
Q8BJU9	MTRF1L	0.3449	0.1032
P51150	RAB7A	-0.3446	0.0392
Q9JII6	AKR1A1	0.3441	0.1434
Q01149	COL1A2	-0.3441	0.4229
Q8BL65	ABLIM2	-0.3435	0.2576
Q8BMD8	SLC25A24	0.3434	0.3556
Q9CWL8	CTNNBL1	0.3429	0.0823
Q56A08	GPKOW	-0.3429	0.0237
Q8VEH8	ERLEC1	-0.3429	0.2519
A2AJL3	FGGY	0.3426	0.1551
O55222	ILK	0.3425	0.3251
Q9DCJ7	AURKAIP1	-0.3424	0.5254
Q8K4K6	PANK1	-0.3423	0.3556
Q8CGC7	EPRS1	-0.3422	0.0114
Q8K2C9	HACD3	0.3418	0.0924
Q8R317	UBQLN1	0.341	0.1179
Q8K4B0	MTA1	-0.3409	0.1113
Q06649	SH3BP2	-0.3405	0.1488
P83940	ELOC	0.3404	0.2208
P31809	CEACAM1	-0.3402	0.1424
Q9QXD1	ACOX2	-0.3402	0.0402
Q3UVG3	FAM91A1	-0.3398	0.4837
P63330	PPP2CA	-0.3395	0.1551
Q571I9	ALDH16A1	0.3395	0.0999
Q60770	STXBP3	0.3394	0.2369
P54822	ADSL	0.3393	0.1774
Q8R344	CCDC12	0.3393	0.4058
Q80X80	C2CD2L	0.3392	0.0843
Q99K41	EMILIN1	0.339	0.0156
Q9R182	ANGPTL3	-0.3389	0.1008
Q6DID3	SCAF8	-0.3388	0.186
Q8BXZ1	TMX3	-0.3387	0.2681
P62137	PPP1CA	0.3385	0.267
Q921X9	PDIA5	0.3382	0.1256
Q6ZQ38	CAND1	-0.3381	0.0433
Q91WT9	CBS	-0.338	0.0653
P28063	PSMB8	-0.3379	0.2904
Q8VHK9	DHX36	-0.3378	0.2322
P56399	USP5	-0.3377	0.0408
Q9DBM0	ABCG8	0.3375	0.1179
P55292	DSC2	0.3374	0.2712
A2BH40	ARID1A	-0.3374	0.2276
Q5EG47	PRKAA1	0.3373	0.1148
Q8VCH8	UBXN4	-0.3371	0.2299
Q9QXY1	TJP3	-0.3364	0.0748
Q64176	CES1E	-0.3363	0.1921
O35075	VPS26C	0.3356	0.3031
P97364	SEPHS2	0.3355	0.3046
Q9EQ20	ALDH6A1	0.3354	0.1364
Q8VDL4	ADPGK	-0.3353	0.2563
Q61699	HSPH1	-0.3352	0.0534
Q64152	BTF3	-0.3349	0.2474
Q91Y47	F11	-0.3348	0.3705
Q9Z2W0	DNPEP	0.3348	0.1269
Q3TLH4	PRRC2C	-0.3347	0.1409
Q8BU14	SEC62	-0.3344	0.2904
O54909	RDH16	-0.3344	0.171
P47809	MAP2K4	-0.3342	0.0741
Q8R326	PSPC1	0.3341	0.0618
Q9R0Q7	PTGES3	-0.3341	0.0769
Q05421	CYP2E1	-0.334	0.0396
Q6PGF5	BMS1	-0.3336	0.1371
Q61070	EI24	-0.3336	0.0377
Q3UU96	CDC42BPA	0.333	0.2275
Q8CGK3	LONP1	0.333	0.0186
A2AN08	UBR4	-0.333	0.0322
Q9D061	ACBD6	-0.3329	0.726
Q61214	DYRK1A	0.3323	0.539
Q9WUK4	RFC2	0.3321	0.2563
Q9WV92	EPB41L3	0.3318	0.4443
P42859	HTT	-0.3318	0.4284
Q62077	PLCG1	0.3315	0.2632
Q7TPM1	PRRC2B	-0.3313	0.2311
O09167	RPL21	-0.3308	0.2989
P70362	UFD1	-0.3307	0.105
Q8CGZ0	CHERP	-0.3306	0.1596
Q9DCM2	GSTK1	0.3306	0.1236
Q61937	NPM1	0.3305	0.0765
Q9CPX6	ATG3	-0.3305	0.0443
P31428	DPEP1	-0.3299	0.4831
P14246	SLC2A2	-0.3298	0.1032
Q3UH06	RREB1	-0.3298	0.2229
Q91WP0	MASP2	0.3297	0.3371
Q9Z1R4	D17H6S53E	-0.3296	0.3648
Q91ZM2	SH2B1	-0.3296	0.2563
Q9DBJ1	PGAM1	0.3296	0.1973
Q8VBT9	ASPSCR1	-0.3294	0.3228
Q9JHD1	KAT2B	0.3294	0.1275
P63101	YWHAZ	-0.3293	0.3347
P53762	ARNT	-0.3292	0.5895
Q8VHZ7	IMP4	0.3291	0.1841
Q9WUN2	TBK1	0.329	0.559
O88447	KLC1	0.3289	0.1866
P26443	GLUD1	0.3289	0.0997
Q61191	HCFC1	-0.3288	0.1331
P97366	EVI5	-0.3287	0.4722
Q9D4H8	CUL2	0.3285	0.2304
Q5PSV9	MDC1	0.3283	0.3278
Q68FM7	ARHGEF11	-0.3281	0.4058
Q3URS9	CCDC51	0.328	0.1149
Q6IRU2	TPM4	0.3279	0.151
Q9WVL3	SLC12A7	-0.3277	0.1841
Q91YK2	RRP1B	-0.3274	0.4142
Q9DAK9	PHPT1	-0.3274	0.357
Q8VE97	SRSF4	-0.3271	0.2563
Q8VCM7	FGG	0.327	0.0154
Q9D8S4	REXO2	0.327	0.1796
Q9CQL5	MRPL18	0.327	0.2327
Q9CXW2	MRPS22	0.3268	0.2269
Q9DBT5	AMPD2	-0.3268	0.0681
Q9JJU8	SH3BGRL	0.3268	0.0789
P38647	HSPA9	0.3266	0.0132
Q8K411	PITRM1	0.3266	0.0364
P13597	ICAM1	0.3266	0.0871
Q9DCJ1	MLST8	-0.3265	0.0653
Q8BLY1	SMOC1	-0.3265	0.433
Q8K363	DDX18	0.3265	0.2773
Q58A65	SPAG9	0.3263	0.0578
Q8C0L9	GPCPD1	0.3255	0.2332
Q9CPQ8	ATP5MG	0.3254	0.0782
P62814	ATP6V1B2	0.3254	0.0672
Q8BVZ1	PLIN5	-0.3253	0.5933
Q99PN3	TRIM26	-0.3252	0.3932
Q9JLZ3	AUH	0.3252	0.2383
Q9CX30	YIF1B	-0.3248	0.4781
Q9CWZ7	NAPG	0.3248	0.1808
P22361	HNF1A	-0.3241	0.0866
Q76MZ3	PPP2R1A	0.324	0.0782
Q3KNM2	MARCHF5	-0.3238	0.6261
F6ZDS4	TPR	0.3236	0.0133
A6H5Z3	EXOC6B	-0.3236	0.078
Q60932	VDAC1	0.3234	0.0896
Q99JX4	EIF3M	0.3234	0.1822
Q9CWW6	PIN4	0.3233	0.3556
Q61702	ITIH1	0.3233	0.0514
P12382	PFKL	-0.3233	0.0479
P63085	MAPK1	0.3231	0.2751
Q9CWE0	MTFR1L	0.3225	0.2437
O35350	CAPN1	-0.3224	0.0409
Q9D7I5	LHPP	0.3223	0.3461
Q9CY73	MRPL44	0.3221	0.1434
P62915	GTF2B	0.3221	0.2756
Q99PG2	OGFR	-0.322	0.1193
O88630	GOSR1	-0.3216	0.3746
Q80XI3	EIF4G3	-0.3213	0.0693
Q62432	SMAD2	-0.3212	0.4322
A2A654	BPTF	-0.3211	0.4694
P35292	RAB17	0.3211	0.505
Q6PDM1	MSL1	-0.321	0.2247
P51863	ATP6V0D1	0.3208	0.3142
Q7TMW6	CIAO3	0.3208	0.221
P70296	PEBP1	-0.3207	0.2856
Q62426	CSTB	0.3207	0.1962
Q8BTV2	CPSF7	0.3207	0.1256
Q9D1L0	CHCHD2	0.3206	0.3129
Q9D6J5	NDUFB8	-0.3205	0.1672
E9PZJ8	ASCC3	-0.3204	0.0459
Q99L20	GSTT3	0.3204	0.2271
Q5SFM8	RBM27	-0.3203	0.4434
Q80UG5	SEPTIN9	-0.3203	0.1256
Q9CR62	SLC25A11	0.3202	0.0314
Q9CQS4	SLC25A46	-0.3202	0.0371
P34022	RANBP1	0.3196	0.0789
Q78JT3	HAAO	-0.3194	0.0214
Q9WUM5	SUCLG1	-0.3194	0.2878
Q9R0M4	PODXL	-0.3193	0.4229
Q68FE2	ATG9A	-0.3192	0.4423
Q62504	SPEN	-0.3189	0.2793
Q8CFX3	PCDH1	-0.3187	0.1482
Q78PG9	CCDC25	-0.3185	0.0669
P47941	CRKL	-0.3183	0.1165
O08599	STXBP1	0.3182	0.0741
P53564	CUX1	-0.3179	0.4105
Q8BH15	CNOT10	-0.3178	0.3869
P70698	CTPS1	-0.3177	0.0739
P26040	EZR	0.3174	0.235
Q8VDK1	NIT1	0.317	0.1044
Q6GV12	KDSR	-0.317	0.5986
Q62415	PPP1R13B	0.3169	0.5128
Q3ULL6	UPF3B	-0.3165	0.1571
Q9DBW0	CYP4V2	-0.3165	0.0691
Q9DAR7	DCPS	0.3163	0.2569
Q9DCF9	SSR3	-0.3161	0.1434
Q9CQJ8	NDUFB9	0.3155	0.232
A2A6A1	GPATCH8	0.3154	0.2949
Q9Z0U1	TJP2	-0.3154	0.0209
Q8CGB6	TNS2	0.3151	0.0762
Q80XK6	ATG2B	-0.3148	0.1685
Q8K4P0	WDR33	-0.3147	0.2618
P52332	JAK1	-0.3146	0.2739
Q99JB2	STOML2	0.3144	0.4155
Q8BG51	RHOT1	-0.3144	0.1062
Q60854	SERPINB6	0.3142	0.322
P47856	GFPT1	-0.3141	0.0727
P27048	SNRPB	0.3138	0.0653
O08692	NGP	0.3136	0.3521
P70266	PFKFB1	-0.3133	0.1424
P29351	PTPN6	-0.3132	0.0536
Q8BIF9	ZNF787	-0.3132	0.2846
Q99N28	CADM3	0.3129	0.5084
P10493	NID1	0.3127	0.1366
Q6DVA0	LEMD2	-0.3126	0.3473
Q8BP67	RPL24	-0.3124	0.3343
P62827	RAN	0.3119	0.2396
P11247	MPO	0.3118	0.2015
Q9QUR7	PIN1	0.3116	0.0299
Q8CI95	OSBPL11	-0.3114	0.091
A2ALU4	SHROOM2	-0.3114	0.0618
Q91YT0	NDUFV1	0.3112	0.1298
O35730	RING1	-0.3111	0.3559
Q9D906	ATG7	-0.3111	0.0931
Q91YX5	LPGAT1	-0.311	0.2223
Q9WVE8	PACSIN2	0.3108	0.0889
P27601	GNA13	0.3106	0.1216
Q03249	GALT	0.3105	0.1419
Q9QY24	ZBP1	-0.3105	0.4375
P41230	KDM5C	-0.3101	0.4608
Q9DBS1	TMEM43	-0.31	0.2322
O88746	TOM1	-0.31	0.3382
P26039	TLN1	0.31	0.0451
O55029	COPB2	-0.31	0.0521
P49615	CDK5	0.31	0.2846
Q8C3W1	V2777	0.3097	0.2122
Q3UKJ7	SMU1	0.3096	0.1419
Q8BNV1	TRMT2A	-0.3095	0.0445
Q69ZL1	FGD6	-0.3094	0.5806
Q924T7	RNF31	-0.3093	0.2494
P27659	RPL3	-0.3092	0.0483
Q9Z0N2	EIF2S3Y	-0.3089	0.098
Q9CQ69	UQCRQ	0.3088	0.1229
Q8QZT1	ACAT1	0.3085	0.078
Q8QZR3	CES2A	-0.3084	0.0704
Q8CGB3	UACA	-0.3082	0.3644
P62874	GNB1	0.3081	0.3732
Q6NVF9	CPSF6	0.308	0.1023
Q6DFZ1	GBF1	-0.3079	0.0932
Q9DCU9	HOGA1	0.3078	0.1439
P58854	TUBGCP3	0.3078	0.443
Q9D0V7	EBAG9	-0.3076	0.3378
Q8VHX6	FLNC	0.3076	0.6267
Q9Z1J3	NFS1	0.3074	0.1235
Q8BMF4	DLAT	0.3068	0.1412
O70194	EIF3D	-0.3068	0.0307
Q9EP75	CYP4F14	-0.3067	0.0378
Q9CR41	HYPK	0.3066	0.536
Q91XY6	PCDHGA2	-0.3064	0.3951
Q3TYX3	SMYD5	-0.3064	0.151
O35623	BET1	0.306	0.2853
P05784	KRT18	0.3059	0.1843
Q80VJ3	DNPH1	0.3057	0.4039
Q8R4X3	RBM12	0.3056	0.2595
Q60872	EIF1A	-0.3056	0.1971
Q924W7	DENND2B	-0.3055	0.6512
P0DP26.P0DP27.P0DP28	CALM1.CALM2.CALM3	-0.3054	0.0948
A0A140T8P9	IGKV14.111	-0.3051	0.3658
Q9JIW9	RALB	0.3048	0.248
P56380	NUDT2	-0.3048	0.3556
P47740	ALDH3A2	-0.3047	0.1521
Q6QI06	RICTOR	0.3044	0.2965
Q3THK7	GMPS	0.3043	0.1351
Q91V16	ETFRF1	0.3043	0.1506
Q8BWS5	GPRIN3	-0.3041	0.2955
P60521	GABARAPL2	-0.3041	0.5689
O35678	MGLL	-0.304	0.1525
Q8BW10	NOB1	0.304	0.4807
Q64267	XPA	-0.304	0.2632
P55264	ADK	-0.3038	0.0764
Q6NZJ6	EIF4G1	-0.3033	0.0768
Q60936	COQ8A	0.3031	0.1371
Q8C7E7	STBD1	0.303	0.3788
Q91YM2	ARHGAP35	0.3028	0.1525
[truncated: 2,778 more rows]

## Sheet: Liver_GO
Category	Term	Count	%	PValue	Genes	List Total	Pop Hits	Pop Total	Fold Enrichment	Bonferroni	Benjamini	FDR
GOTERM_BP_DIRECT	GO:0006629~lipid metabolic process	106	12.2402	1.15e-29	O55137, O35488, O88736, Q9DC50, Q91VT4, P10649, Q2TBE6, Q61205, Q9D517, P97872, Q61207, Q9CX98, Q99J39, P54869, O70362, P15535, Q60991, P50544, Q80XN0, P32020, Q8VCC1, P17717, O88962, Q9Z2V4, P29416, Q8BMS1, Q9R092, E9Q555, P56655, P56654, Q60963, P15626, P19157, A2AKK5, Q99N16, Q9QWR8, Q8JZK9, Q920L1, Q9QXD1, Q91Y74, Q9CQR4, Q8R3F5, Q05421, P51658, Q8K3K7, P53798, Q9D2R0, Q91VA0, O08983, O35657,…	828	741	20199	3.48969	3.91e-26	3.91e-26	3.86e-26
GOTERM_BP_DIRECT	GO:0006412~translation	50	5.77367	4.18e-14	Q8BFR5, Q8BIP0, S4R2K0, Q9JKF7, Q8BYM8, Q9CQ06, O70194, P47915, Q9CZN8, Q8CGC7, P63323, Q9CQF8, Q03963, Q9D8P4, Q9D7N3, Q8CFI5, Q924T2, Q8BU30, P62908, Q9CPR5, Q6ZWY3, P14206, Q8R1B4, Q9CQP0, Q9CQR2, Q9D1P0, Q8BX17, Q9D0R2, P83882, Q8R010, Q921S7, P27659, P60229, P62983, Q8K2Y7, Q14CH7, P61514, P62843	828	349	20199	3.49498	1.42e-10	4.73e-11	4.67e-11
GOTERM_BP_DIRECT	GO:0015031~protein transport	49	5.6582	4.37e-05	Q61598, Q9DBH5, A2ASQ1, Q8BGX2, A2A5R2, P17427, F6ZDS4, Q61595, Q9D880, O35963, P62075, Q5BL07, O35609, Q3UIR3, P22892, A6H6A9, O89020, Q3U829, Q9EPL8, P51150, Q8BFY9, Q9WTQ8, Q80T14, P58742, Q8VHE0, Q9CWK8, P17563, Q60960, Q9WV96, P50396, Q9D1M0, Q9EPK7, Q63836, Q9D8S3, Q9D662, Q9D8B3, Q91X51, Q9CPX6, Q99J56, Q3UM18, Q3UHQ6, Q8BGI5, Q9Z2C5, P62746, Q9EPE9, O89079, P40336, P62743, O35857	828	641	20199	1.86482	0.137797	0.00670116	0.00662223
GOTERM_BP_DIRECT	GO:0006631~fatty acid metabolic process	43	4.96536	1.85e-18	Q3UUI3, Q91WL5, P50171, Q8JZR0, Q99JY0, Q9CQ62, O55042, A2AKK5, P42125, O55137, Q9QYR7, O35488, Q8BWT1, Q920L1, Q9DC50, P55050, P41216, Q9QXD1, Q91VT4, Q9Z0M5, Q8R3F5, Q5SWU9, P51174, E9Q4Z2, P52825, Q05421, O08914, Q99J39, Q99KP3, Q91VA0, P50544, Q9D2R0, Q3TLP5, O35459, Q07417, Q8VHQ9, Q8VCC1, Q8R0X7, P98192, Q9DB60, Q9DCS3, Q8BMS1, Q99PI5	828	203	20199	5.1674	6.27e-15	3.13e-15	3.1e-15
GOTERM_BP_DIRECT	GO:0043066~negative regulation of apoptotic process	40	4.61894	0.0132165	Q9Z1P8, Q6P1H6, P07724, Q91ZX7, Q64669, P99029, P34884, Q8VDQ8, P19157, O55042, O35841, Q6PHQ8, Q80UM3, Q03963, Q8VCH6, Q9QVP9, P45376, Q9D1L9, Q9JLV1, Q925I1, Q9D0L7, P24270, Q61823, Q64374, P11499, P03958, P14602, Q06890, Q8VCN5, Q8BY87, O35613, P20108, P67778, P17879, Q02248, Q9JKW0, P63038	828	657	20199	1.48523	1	0.42746	0.422425
GOTERM_BP_DIRECT	GO:0009410~response to xenobiotic stimulus	33	3.81062	2.3e-06	P23492, Q64669, P11725, Q03311, O55042, Q5SUR0, Q9JJL3, Q9QVP9, Q9DC50, P55096, Q8CIM7, O55239, P22315, Q9DB77, P47877, Q9Z0M5, P24270, P51175, E9Q4Z2, P54869, Q8K3K7, Q9D2R0, Q8BY87, P14211, P67778, Q9QUI0, Q61070, Q02248, O09172, P98192, Q8BMS1	828	315	20199	2.55566	0.00778763	0.000521	0.000515
GOTERM_BP_DIRECT	GO:0006805~xenobiotic metabolic process	27	3.11778	7.78e-14	P56655, P56654, O55060, P19157, Q6XVG2, Q8CIM7, Q91X77, O54749, P20852, P24456, Q64458, P50285, P97872, P10648, Q9CX98, Q05421, P33267, K9J7B2, O08915, A6H6J2, G3X982, Q9JKY7, P56593, O54754, Q91W64	828	105	20199	6.27298	2.64e-10	6.61e-11	6.53e-11
GOTERM_BP_DIRECT	GO:0006397~mRNA processing	25	2.88684	0.0206554	Q8R3G1, Q9QXA5, Q8BNV1, Q8BL97, Q8BTI8, Q8K1J5, O35691, P97801, A2A4P0, P84104, Q3TIU4, Q9CQF3, Q14AI6, Q5U4C3, Q91Z31, Q8BHS3, P49312, Q9D0T1, Q56A08, Q8BX17, P62320, Q8CCF0, Q8BG05, Q4FK66, O35658	828	374	20199	1.63068	1	0.535465	0.529158
GOTERM_BP_DIRECT	GO:0002181~cytoplasmic translation	22	2.54042	4.7e-09	P47915, P62908, P63323, P83882, P27659, P14206, P62983, Q9CQR2, P61514, P62843	828	112	20199	4.79186	1.6e-05	1.99e-06	1.97e-06
GOTERM_BP_DIRECT	GO:0008152~metabolic process	22	2.54042	3.89e-05	P23780, P20060, Q5SWU9, Q60967, E9Q4Z2, Q9DBL7, Q99K67, P12265, P53798, Q61036, Q9WVL0, O09159, P12382, O35657, Q8CGC7, Q05920, Q80XN0, Q9QWR8, Q8R242, P29416, Q8BMS1, E9Q555	828	191	20199	2.80989	0.123755	0.00660533	0.00652753
GOTERM_BP_DIRECT	GO:0005975~carbohydrate metabolic process	22	2.54042	4.54e-05	P23780, P20060, Q8JZV7, Q8BWJ3, P58158, P97328, Q9D051, Q9CQ60, P15535, P12265, O09159, O35657, Q00612, Q9QWR8, Q8R242, Q8BFP9, Q8CHP8, Q9JK42, P29416, Q6ZQI3, Q9WUA5, Q91X52	828	193	20199	2.78077	0.14284	0.00670116	0.00662223
GOTERM_BP_DIRECT	GO:0008380~RNA splicing	22	2.54042	0.00796921	Q8R3G1, Q8BHS3, Q9QXA5, Q8BL97, Q8BTI8, P49312, P97762, Q8K1J5, Q9D0T1, O35691, Q56A08, P97801, A2A4P0, Q8BX17, P62320, P84104, Q5U4C3, Q91Z31, Q8CCF0, Q8BG05, O35658, Q4FK66	828	288	20199	1.8635	1	0.331349	0.327446
GOTERM_BP_DIRECT	GO:0006635~fatty acid beta-oxidation	19	2.194	8.38e-12	Q60994, Q9WUR2, Q99JY0, P52825, Q9CQ62, P50544, Q8CAY6, Q3TLP5, O35459, P42125, Q8BWT1, O35488, P32020, Q8K370, Q9DC50, P55096, Q8BMS1, Q9QXD1	828	58	20199	7.99144	2.84e-08	4.06e-09	4.02e-09
GOTERM_BP_DIRECT	GO:0032543~mitochondrial translation	19	2.194	4.19e-08	Q9CR59, Q9Z2Q5, Q9CPR5, Q9JKF7, Q8BK72, Q9CQ06, Q9JIK9, Q9CQP0, Q9CQV5, Q9D1P0, Q8VDT9, Q9CZN8, Q9CQF8, Q80ZS3, Q921S7, Q9D8P4, Q924T2, Q9D7N3, Q8K2Y7	828	94	20199	4.93089	0.000142	1.42e-05	1.4e-05
GOTERM_BP_DIRECT	GO:0007005~mitochondrion organization	18	2.07852	5.01e-05	Q925I1, Q3U4I7, Q811U4, P97792, Q9Z0M5, Q9CYV5, Q9CQS4, P06909, Q91VA6, P20108, P67778, Q3UBG2, Q8BK08, Q9Z2C5, P38060, Q5SW19, Q9WUA5, Q8CGK3	828	138	20199	3.18195	0.15658	0.00709523	0.00701166
GOTERM_BP_DIRECT	GO:0042274~ribosomal small subunit biogenesis	17	1.96305	5.8e-07	P63323, P35550, Q6ZWY3, Q8CIL4, Q9D0T1, P62983, P62843	828	89	20199	4.65971	0.00196657	0.000164	0.000162
GOTERM_BP_DIRECT	GO:0008203~cholesterol metabolic process	17	1.96305	4.25e-05	P52430, Q61578, Q91ZX7, Q9Z0M5, Q8C7G5, P24270, P54869, P70245, Q60991, P53798, Q8JZK9, Q71KT5, Q8VCH6, P23953, P22315, Q8C142	828	123	20199	3.37166	0.134434	0.00670116	0.00662223
GOTERM_BP_DIRECT	GO:0045471~response to ethanol	17	1.96305	6.93e-05	Q60994, Q8BFR5, Q64669, P24270, O35593, P54869, P19157, Q9D2R0, P67778, Q00612, Q8VCC1, Q9QVP9, P22315, P20444	828	128	20199	3.23995	0.209778	0.00905513	0.00894848
GOTERM_BP_DIRECT	GO:0008202~steroid metabolic process	17	1.96305	0.00011	Q61578, Q05421, P51658, Q64464, P54869, P70245, A6H6J2, Q60991, P53798, Q8R084, Q80XN0, Q8JZK9, Q71KT5, Q8VCH6, P17717, Q9R092, Q8C142	828	133	20199	3.11815	0.311706	0.013834	0.0136711
GOTERM_BP_DIRECT	GO:0006979~response to oxidative stress	17	1.96305	0.000301	Q64669, P24270, P99029, Q8K3J1, Q8CC86, Q7TMF3, Q9CQZ5, Q8R180, P16015, P20108, Q9Z0X1, Q00612, O54962, Q61171, O09172, P46412	828	145	20199	2.86009	0.640688	0.0301003	0.0297457
GOTERM_BP_DIRECT	GO:0050821~protein stabilization	17	1.96305	0.0118414	O89020, Q60953, Q60634, O08917, P70398, P11499, Q7TT18, Q9EP53, Q06890, Q9QUR7, P67778, P14211, Q80UM3, P14094, Q9JLV1, P63038, S4R1W1	828	208	20199	1.99382	1	0.386668	0.382114
GOTERM_BP_DIRECT	GO:0006886~intracellular protein transport	17	1.96305	0.0936547	Q9EPL8, Q9EPK7, Q61207, P51150, Q8BFY9, Q9WTQ8, P17427, Q9D662, Q9CWK8, Q8K1X1, O35609, P62746, P22892, P24668, P40336, P62743, O35857	828	272	20199	1.52468	1	1	0.988513
GOTERM_BP_DIRECT	GO:0006749~glutathione metabolic process	15	1.7321	3.04e-08	P10649, P10648, P15626, P19157, Q61133, Q8VCN5, Q9WVL0, Q9DCM0, P19639, Q00612, O09172, P46412, Q9JIY7	828	55	20199	6.65316	0.000103	1.15e-05	1.13e-05
GOTERM_BP_DIRECT	GO:0006694~steroid biosynthetic process	15	1.7321	7.63e-07	Q9D0S9, P50171, P51658, P54869, P70245, Q60991, P53798, O88736, Q8JZK9, Q71KT5, P32020, Q8VCH6, O88962, O70503	828	70	20199	5.22748	0.00258674	0.000199	0.000197
GOTERM_BP_DIRECT	GO:0001822~kidney development	15	1.7321	0.0177959	Q91WL5, P24270, P97785, Q64374, P51954, P54869, Q9EP53, P06909, Q99J99, Q9QUI0, Q02248, Q8R0X7, Q8VCC1, O35728	828	182	20199	2.01057	1	0.468489	0.462971
GOTERM_BP_DIRECT	GO:0043161~proteasome-mediated ubiquitin-dependent protein catabolic process	15	1.7321	0.095593	Q60953, Q8C7D2, O35593, O08759, Q8VDQ8, Q9R1P3, Q99J56, P61079, Q02248, Q9Z2C5, P06683, Q8CFI0, Q8CCH2, Q8CFI2, Q9WUA5	828	232	20199	1.57726	1	1	0.988513
GOTERM_BP_DIRECT	GO:0006334~nucleosome assembly	14	1.61663	6.54e-05	O35613, P62806	828	89	20199	3.8374	0.199247	0.00888782	0.00878314
GOTERM_BP_DIRECT	GO:0072659~protein localization to plasma membrane	14	1.61663	0.0304329	Q8BG67, Q91WN2, Q60994, P70182, Q9D1M0, Q60634, O08917, P04919, Q02357, P32020, P14094, G5E8K5, Q8K212	828	177	20199	1.92954	1	0.663139	0.655329
GOTERM_BP_DIRECT	GO:0045653~negative regulation of megakaryocyte differentiation	13	1.50115	3.04e-13	P62806	828	18	20199	17.6186	1.03e-09	2.06e-10	2.04e-10
GOTERM_BP_DIRECT	GO:0061644~protein localization to CENP-A containing chromatin	13	1.50115	7.94e-13	P62806	828	19	20199	16.6913	2.7e-09	4.49e-10	4.44e-10
GOTERM_BP_DIRECT	GO:0090263~positive regulation of canonical Wnt signaling pathway	13	1.50115	0.00352471	Q9QUR7, Q8BY87, P63323	828	119	20199	2.66499	0.999994	0.200398	0.198037
GOTERM_BP_DIRECT	GO:0032259~methylation	13	1.50115	0.0759845	Q8BNV1, P40936, O55060, O35490, Q3TL26, P35550, Q8CFA2, P23506, Q9CWG8, O55239, O35969, Q9CXI0, Q8BMS4	828	184	20199	1.72355	1	1	0.988513
GOTERM_BP_DIRECT	GO:0019373~epoxygenase P450 pathway	12	1.38568	1.63e-07	Q64458, P56655, P56654, Q6XVG2, Q05421, P33267, P56593, Q91X77, O54749, P20852, A6H6J2, Q91W64	828	37	20199	7.91187	0.000554	5.04e-05	4.98e-05
GOTERM_BP_DIRECT	GO:0019369~arachidonic acid metabolic process	12	1.38568	2.29e-06	Q64458, P56655, P56654, Q6XVG2, Q91WL5, Q920L1, Q9JKY7, Q8CIM7, O35728, Q91X77, Q9EP75, P24456	828	47	20199	6.22849	0.00773756	0.000521	0.000515
GOTERM_BP_DIRECT	GO:0007584~response to nutrient	12	1.38568	0.000137	Q60994, Q64669, P50429, E9Q4Z2, Q99J39, O09172, P98192, P54869, Q03311, P41216, P47877, Q9D2R0	828	71	20199	4.12309	0.372978	0.0160946	0.015905
GOTERM_BP_DIRECT	GO:0001889~liver development	12	1.38568	0.00354059	O08795, Q8VHE0, Q9JJL3, Q9Z0M5, P11725, Q99KI0, Q80W54, P03958, P54869, Q07113, Q99J99, Q9D2R0	828	104	20199	2.8148	0.999994	0.200398	0.198037
GOTERM_BP_DIRECT	GO:0006457~protein folding	12	1.38568	0.00910241	Q8BYA0, P14211, Q9CQ48, P17879, Q61390, P38647, P11499, P35564, P63038, P48428, Q8R180, Q61696	828	118	20199	2.48084	1	0.358744	0.354518
GOTERM_BP_DIRECT	GO:0006486~protein glycosylation	12	1.38568	0.021869	P46978, Q9DBE8, Q921V5, Q6PB93, P97325, P58158, Q8BTZ7, Q3U3R4, P15535, Q3TDQ1, Q91Y74, Q78XF5	828	134	20199	2.18462	1	0.557798	0.551228
GOTERM_BP_DIRECT	GO:0000398~mRNA splicing, via spliceosome	12	1.38568	0.0991072	P62320, Q9QXA5, Q8BL97, Q8BTI8, P49312, P84104, Q9D0T1, Q56A08, Q8CCF0, A2A4P0, Q8BG05, Q4FK66	828	173	20199	1.69213	1	1	0.988513
GOTERM_BP_DIRECT	GO:0006633~fatty acid biosynthetic process	11	1.27021	0.000753	Q8R3F5, P50171, Q5SWU9, E9Q4Z2, Q920L1, Q99J39, P55096, Q9DB60, Q9DCS3, Q91VT4, Q91VA0	828	73	20199	3.67595	0.922599	0.0655844	0.0648119
GOTERM_BP_DIRECT	GO:0007160~cell-matrix adhesion	11	1.27021	0.00590645	Q99K41, Q9QUI0, Q8K1B8, Q02248, P24063, O70309, Q9R069, E9PV24, Q8VCM7, Q9EP53, Q8K0E8	828	96	20199	2.79525	1	0.274771	0.271535
GOTERM_BP_DIRECT	GO:0032355~response to estradiol	11	1.27021	0.0102285	P14211, Q64669, P24270, Q02248, Q8VCC1, P19157, P20444, P47877	828	104	20199	2.58023	1	0.377564	0.373117
GOTERM_BP_DIRECT	GO:0065003~macromolecular complex assembly	11	1.27021	0.0268926	P29699, P99025, Q60953, Q8R010, E9PV24, Q8VCM7, Q9CQS4, P48193, Q9WV69, Q8CGK3, Q8K0E8	828	121	20199	2.21772	1	0.634218	0.626748
GOTERM_BP_DIRECT	GO:0042744~hydrogen peroxide catabolic process	10	1.15473	2.77e-06	A8DUK4, P20108, P24270, P99029, Q61171, P01942, P46412, P02104	828	31	20199	7.86933	0.00935928	0.000588	0.000581
GOTERM_BP_DIRECT	GO:0006099~tricarboxylic acid cycle	10	1.15473	1.08e-05	Q60597, Q91VA7, Q9D6R2, Q9Z2I9, Q9CZB0, Q99KI0, Q9Z2I8, Q9D051, P54071, Q8C6I2	828	36	20199	6.77637	0.0358701	0.00202939	0.00200549
GOTERM_BP_DIRECT	GO:0006695~cholesterol biosynthetic process	10	1.15473	3.33e-05	Q9Z0M5, O88736, Q8JZK9, Q00612, Q71KT5, Q8VCH6, P23953, P54869, P70245, P53798	828	41	20199	5.94998	0.106965	0.00595406	0.00588393
GOTERM_BP_DIRECT	GO:0000045~autophagosome assembly	10	1.15473	0.00237259	O55143, O35963, Q9CQW0, P51150, Q80W47, Q9Z2C5, Q9CPX6, P18242, Q9JLV1, Q9WUA5	828	71	20199	3.43591	0.999686	0.157987	0.156126
GOTERM_BP_DIRECT	GO:0030433~ubiquitin-dependent ERAD pathway	10	1.15473	0.00346264	P14211, Q8BNI4, Q6PDI5, P60670, Q9QZN4, P35564, Q9R049, E9Q735, Q3TDQ1, Q99J56	828	75	20199	3.25266	0.999992	0.200398	0.198037
GOTERM_BP_DIRECT	GO:0006006~glucose metabolic process	10	1.15473	0.00627813	Q60994, Q05816, Q9Z0M5, Q00612, Q8BFP9, Q9JK42, Q9Z2V4, Q9D051, S4R1W1, Q91X52	828	82	20199	2.97499	1	0.288115	0.284722
GOTERM_BP_DIRECT	GO:0070373~negative regulation of ERK1 and ERK2 cascade	10	1.15473	0.00791923	Q9QUR7, P67778, Q99K41, Q60994, P69566, P19157, P39876, Q9D7X3	828	85	20199	2.86999	1	0.331349	0.327446
GOTERM_BP_DIRECT	GO:0009636~response to toxic substance	10	1.15473	0.00986814	P52430, Q9Z0X1, Q9Z2J0, Q03963, P40936, P33267, Q91XE0, P19157	828	88	20199	2.77215	1	0.368266	0.363928
GOTERM_BP_DIRECT	GO:0034599~cellular response to oxidative stress	10	1.15473	0.0148225	P20108, O55143, Q64669, Q00612, P99029, Q61171, Q3UVK0, Q8VDQ8, O55042, Q8CGK3	828	94	20199	2.59521	1	0.436415	0.431275
GOTERM_BP_DIRECT	GO:0007264~small GTPase mediated signal transduction	10	1.15473	0.0226771	Q8BUR4, P50396, Q61598, P81117, Q9QUI0, Q9Z0M5, Q62172, P62746, B2RY04, Q3UYI5	828	101	20199	2.41534	1	0.558055	0.551482
GOTERM_BP_DIRECT	GO:0017148~negative regulation of translation	10	1.15473	0.0423868	P62908, P14211, Q8CGC7, Q03160, Q03963, Q8CCH2, P20444, Q9EP53, Q9D1P0, S4R1W1	828	113	20199	2.15884	1	0.851748	0.841716
GOTERM_BP_DIRECT	GO:0009058~biosynthetic process	9	1.03926	0.000125	P49586, O88986, Q9WVM8, Q8BTZ7, Q9DBL7, Q99JR6, A2AIL4, Q9CXN7, P53798	828	38	20199	5.77775	0.346199	0.0151759	0.0149972
GOTERM_BP_DIRECT	GO:0031100~animal organ regeneration	9	1.03926	0.000891	P67778, P42703, P00329, O55239, P19157, O35639, Q07113	828	50	20199	4.39109	0.951524	0.0756337	0.0747428
GOTERM_BP_DIRECT	GO:0014823~response to activity	9	1.03926	0.00403363	Q60994, P24270, O09172, Q9CZ13, Q9Z2V4, P08122, P04919, Q8VCL2	828	63	20199	3.48499	0.999999	0.220939	0.218337
GOTERM_BP_DIRECT	GO:0032981~mitochondrial respiratory chain complex I assembly	9	1.03926	0.00589058	Q3TQB2, Q9Z0X1, O35683, Q8K3J1, Q9CWG8, Q9CQZ5, Q7TMF3, A2AIL4, Q9CQ54	828	67	20199	3.27693	1	0.274771	0.271535
GOTERM_BP_DIRECT	GO:0007596~blood coagulation	9	1.03926	0.0114702	O08983, P56400, P16294, Q07235, E9PV24, Q8VCM7, P04919, Q08761, Q8K0E8	828	75	20199	2.92739	1	0.385671	0.381128
GOTERM_BP_DIRECT	GO:0034097~response to cytokine	9	1.03926	0.0176911	Q9JJL3, P42703, Q60953, P07759, Q02248, Q91WP6, Q00896, P39876, P06909	828	81	20199	2.71055	1	0.468489	0.462971
GOTERM_BP_DIRECT	GO:0010951~negative regulation of endopeptidase activity	9	1.03926	0.0202191	P29699, P07759, Q91WP6, Q00896, Q07235, P39876, Q9QXC1, S4R1W1, Q9D154	828	83	20199	2.64523	1	0.528184	0.521963
GOTERM_BP_DIRECT	GO:0043525~positive regulation of neuron apoptotic process	9	1.03926	0.0453789	Q9QUR7, P67778, Q9QUI0, Q9Z0X1, Q64669, Q02248, Q8R010, Q8CFI2, Q61036	828	97	20199	2.26345	1	0.885672	0.87524
GOTERM_BP_DIRECT	GO:0032869~cellular response to insulin stimulus	9	1.03926	0.0754977	Q60994, Q8CGC7, P54869, O70362, P19157, Q9Z2V4, Q99PI5	828	108	20199	2.03291	1	1	0.988513
GOTERM_BP_DIRECT	GO:0001676~long-chain fatty acid metabolic process	8	0.923788	0.000168	Q9R0X4, O55137, Q9QYR7, O35488, Q8JZR0, P52825, Q05421, P41216	828	30	20199	6.50531	0.434022	0.0181607	0.0179468
GOTERM_BP_DIRECT	GO:0043651~linoleic acid metabolic process	8	0.923788	0.000316	Q6XVG2, Q91WL5, O35728, P19157, Q91X77, O54749	828	33	20199	5.91392	0.658134	0.0306619	0.0303007
GOTERM_BP_DIRECT	GO:0006487~protein N-linked glycosylation	8	0.923788	0.00505171	P46978, Q9DB25, Q921V5, Q91X51, P15535, Q3TDQ1, Q6ZQI3, Q78XF5	828	52	20199	3.75307	1	0.250965	0.248009
GOTERM_BP_DIRECT	GO:0008654~phospholipid biosynthetic process	8	0.923788	0.0142168	P70182, Q9D517, P49586, Q8JZR0, P20060, P98192, Q8K3K7, Q8C025	828	63	20199	3.09777	1	0.436415	0.431275
GOTERM_BP_DIRECT	GO:0042776~mitochondrial ATP synthesis coupled proton transport	8	0.923788	0.0154165	Q9CZB0, O35683, Q8K3J1, Q9CQQ7, Q9CQZ5, Q7TMF3, Q9CQ54, Q9DB20	828	64	20199	3.04937	1	0.436415	0.431275
GOTERM_BP_DIRECT	GO:0032092~positive regulation of protein binding	8	0.923788	0.0258856	Q9QUR7, Q91ZX7, P08032, O08917, P70398, Q3UIR3, A2ASQ1, P48193	828	71	20199	2.74872	1	0.619067	0.611775
GOTERM_BP_DIRECT	GO:0036503~ERAD pathway	8	0.923788	0.0380551	P14211, Q8BNI4, Q6PDI5, Q9QZN4, P35564, Q9R049, E9Q735, Q99J56	828	77	20199	2.53454	1	0.792854	0.783515
GOTERM_BP_DIRECT	GO:0030097~hemopoiesis	8	0.923788	0.0830453	Q9DCT8, Q9Z0M5, P08032, P15508, Q02248, Q8R0X7, Q9D0F4, P70245	828	92	20199	2.1213	1	1	0.988513
GOTERM_BP_DIRECT	GO:0006779~porphyrin-containing compound biosynthetic process	7	0.808314	1.05e-05	P08032, P51175, P15508, Q02357, P51163, P22315	828	14	20199	12.1975	0.0349448	0.00202939	0.00200549
GOTERM_BP_DIRECT	GO:0006637~acyl-CoA metabolic process	7	0.808314	0.00118202	Q9R0X4, O55137, Q8VHQ9, Q9QYR7, P38060, A2AKK5, Q91VA0	828	30	20199	5.69215	0.981984	0.0955745	0.0944488
GOTERM_BP_DIRECT	GO:1904706~negative regulation of vascular smooth muscle cell proliferation	7	0.808314	0.00314816	Q60994, Q9QUI0, Q61823, P19157, P39876	828	36	20199	4.74346	0.999978	0.190913	0.188664
GOTERM_BP_DIRECT	GO:0040014~regulation of multicellular organism growth	7	0.808314	0.00314816	O35613, Q64726, Q00612, Q8R0X7, Q80W54, O35969, Q64105	828	36	20199	4.74346	0.999978	0.190913	0.188664
GOTERM_BP_DIRECT	GO:0006693~prostaglandin metabolic process	7	0.808314	0.00475357	P10649, Q8VCC1, Q8BK48, Q9DB60, P19157	828	39	20199	4.37858	1	0.247669	0.244751
GOTERM_BP_DIRECT	GO:0042542~response to hydrogen peroxide	7	0.808314	0.0144477	P20108, P24270, Q9QVP9, O08759, Q99KH8, P04919	828	49	20199	3.48499	1	0.436415	0.431275
GOTERM_BP_DIRECT	GO:0006958~complement activation, classical pathway	7	0.808314	0.015866	Q64735, Q8BH35, P08607, P06683, P98086, O35658	828	50	20199	3.41529	1	0.445298	0.440053
GOTERM_BP_DIRECT	GO:0006986~response to unfolded protein	7	0.808314	0.0264255	Q8BNI4, Q9QZN4, P14602, Q3TDQ1, P63038, Q99J56, Q61696	828	56	20199	3.04937	1	0.627558	0.620167
GOTERM_BP_DIRECT	GO:0010595~positive regulation of endothelial cell migration	7	0.808314	0.0436394	P14211, Q9QVP9, P62746, Q61140, O70362, P20444, O35639	828	63	20199	2.71055	1	0.871762	0.861494
GOTERM_BP_DIRECT	GO:0009725~response to hormone	7	0.808314	0.0495969	Q64669, Q61823, Q8VCH6, Q9QVP9, P39876, Q5U4H9, Q8CGK3	828	65	20199	2.62715	1	0.928975	0.918033
GOTERM_BP_DIRECT	GO:0051592~response to calcium ion	7	0.808314	0.0527538	P50396, Q9DBE8, Q9QVP9, Q9QXX4, E9PV24, Q8VCM7, Q8K0E8	828	66	20199	2.58734	1	0.97147	0.960027
GOTERM_BP_DIRECT	GO:0009060~aerobic respiration	7	0.808314	0.0782066	P24270, O35683, Q8K3J1, Q9CQZ5, Q7TMF3, Q9CQ54	828	73	20199	2.33924	1	1	0.988513
GOTERM_BP_DIRECT	GO:0010033~response to organic substance	7	0.808314	0.0909028	P45376, O35609, Q9JKY7, P97821, P11499, P41216, Q9Z0U1	828	76	20199	2.2469	1	1	0.988513
GOTERM_BP_DIRECT	GO:0051865~protein autoubiquitination	7	0.808314	0.09995	Q9CY62, Q6A009, P61079, Q3UIR3, O08759, Q9R049, E9Q555	828	78	20199	2.18929	1	1	0.988513
GOTERM_BP_DIRECT	GO:0042026~protein refolding	6	0.692841	0.00133782	P17879, P38647, P16627, P14602, P63038, Q61696	828	21	20199	6.96998	0.989394	0.103256	0.102039
GOTERM_BP_DIRECT	GO:0000038~very long-chain fatty acid metabolic process	6	0.692841	0.00167353	O55137, Q9QYR7, O35488, P55096, P41216, Q9QXD1	828	22	20199	6.65316	0.996614	0.120921	0.119497
GOTERM_BP_DIRECT	GO:0007041~lysosomal transport	6	0.692841	0.00206712	Q91ZX7, Q61207, P24668, Q07113, Q80X71, Q61696	828	23	20199	6.36389	0.999113	0.143264	0.141577
GOTERM_BP_DIRECT	GO:0098869~cellular oxidant detoxification	6	0.692841	0.00305026	A8DUK4, P24270, P01942, P46412, P02104	828	25	20199	5.85478	0.999969	0.190913	0.188664
GOTERM_BP_DIRECT	GO:0000302~response to reactive oxygen species	6	0.692841	0.00365106	P24270, P19157, P20444	828	26	20199	5.6296	0.999996	0.203262	0.200868
GOTERM_BP_DIRECT	GO:0006956~complement activation	6	0.692841	0.00509912	Q64735, Q8BH35, E9Q8B5, P06683, P06909	828	28	20199	5.22748	1	0.250965	0.248009
GOTERM_BP_DIRECT	GO:0010906~regulation of glucose metabolic process	6	0.692841	0.00691254	Q60994, E9Q4Z2, Q8BFP9, Q99J39, Q80W54, Q9JK42	828	30	20199	4.87899	1	0.300961	0.297416
GOTERM_BP_DIRECT	GO:0016126~sterol biosynthetic process	6	0.692841	0.00796965	Q8JZK9, Q71KT5, Q8VCH6, P54869, P70245, P53798	828	31	20199	4.7216	1	0.331349	0.327446
GOTERM_BP_DIRECT	GO:0015908~fatty acid transport	6	0.692841	0.0091339	Q05816, O35488, Q8JZR0, Q9DC50, P55050, P41216	828	32	20199	4.57405	1	0.358744	0.354518
GOTERM_BP_DIRECT	GO:0009409~response to cold	6	0.692841	0.0091339	Q9Z0M5, Q8VHQ9, Q9CYV5, P51174, P63038, P50544	828	32	20199	4.57405	1	0.358744	0.354518
GOTERM_BP_DIRECT	GO:0048821~erythrocyte development	6	0.692841	0.0104102	Q00612, Q02357, P01942, P15327, P04919, Q9WV69	828	33	20199	4.43544	1	0.380141	0.375664
GOTERM_BP_DIRECT	GO:0006418~tRNA aminoacylation for protein translation	6	0.692841	0.0118034	Q8CGC7, Q8BIP0, Q8BYM8, Q8CFI5, Q8BU30, Q9D0R2	828	34	20199	4.30499	1	0.386668	0.382114
GOTERM_BP_DIRECT	GO:0071385~cellular response to glucocorticoid stimulus	6	0.692841	0.0118034	Q8R084, K9J7B2, P54869, P19157	828	34	20199	4.30499	1	0.386668	0.382114
GOTERM_BP_DIRECT	GO:0070527~platelet aggregation	6	0.692841	0.0149583	A2AQ07, Q8K1B8, E9PV24, Q8VCM7, P06909, Q8K0E8	828	36	20199	4.06582	1	0.436415	0.431275
GOTERM_BP_DIRECT	GO:0070050~neuron cellular homeostasis	6	0.692841	0.0167284	Q8CAQ8, O55143, P20060, P00920, Q78JT3, Q80X71	828	37	20199	3.95593	1	0.465653	0.460168
GOTERM_BP_DIRECT	GO:0006641~triglyceride metabolic process	6	0.692841	0.0228546	Q9Z0M5, Q8C7G5, P24270, Q05421, Q3U3R4	828	40	20199	3.65924	1	0.558376	0.551799
GOTERM_BP_DIRECT	GO:0006096~glycolytic process	6	0.692841	0.0359659	Q60597, P12382, Q9Z0M5, A6ZI46, P15327, S4R1W1	828	45	20199	3.25266	1	0.758634	0.749699
GOTERM_BP_DIRECT	GO:0046627~negative regulation of insulin receptor signaling pathway	6	0.692841	0.0359659	P29699, P81117, Q3UBG2, P20444, Q99M51, Q8CGK3	828	45	20199	3.25266	1	0.758634	0.749699
GOTERM_BP_DIRECT	GO:0007599~hemostasis	6	0.692841	0.0422778	P56400, P16294, E9PV24, Q8VCM7, Q08761, Q8K0E8	828	47	20199	3.11425	1	0.851748	0.841716
GOTERM_BP_DIRECT	GO:0030968~endoplasmic reticulum unfolded protein response	6	0.692841	0.0529217	Q8BNI4, Q03963, Q3UVK0, Q9R049, Q99J56, Q8R180	828	50	20199	2.92739	1	0.97147	0.960027
GOTERM_BP_DIRECT	GO:0008333~endosome to lysosome transport	6	0.692841	0.0567851	Q9Z0M5, P51150, Q9Z2C5, Q3UIR3, P62746, Q6P9N8	828	51	20199	2.86999	1	1	0.988513
GOTERM_BP_DIRECT	GO:0006094~gluconeogenesis	6	0.692841	0.0608064	Q05920, Q9CR62, Q9QXX4, Q9Z2V4, Q00724, S4R1W1	828	52	20199	2.8148	1	1	0.988513
GOTERM_BP_DIRECT	GO:0007040~lysosome organization	6	0.692841	0.0693203	O08983, Q9Z0M5, P20060, Q3UHA3, P29416, Q80X71	828	54	20199	2.71055	1	1	0.988513
GOTERM_BP_DIRECT	GO:0009306~protein secretion	6	0.692841	0.0693203	O08983, Q61207, Q9D8S3, P97798, Q8VCM7, Q3U3R4	828	54	20199	2.71055	1	1	0.988513
GOTERM_BP_DIRECT	GO:0006879~cellular iron ion homeostasis	6	0.692841	0.0832559	P09528, Q9DBI0, Q8BGS2, P97798, P29391, Q5U4H9	828	57	20199	2.56789	1	1	0.988513
GOTERM_BP_DIRECT	GO:0034614~cellular response to reactive oxygen species	6	0.692841	0.0882063	P62908, Q64337, P20108, Q61207, P99029, Q9JK42	828	58	20199	2.52361	1	1	0.988513
GOTERM_BP_DIRECT	GO:0033591~response to L-ascorbic acid	5	0.577367	0.000171	P24270, P19157	828	8	20199	15.2468	0.440769	0.0181607	0.0179468
GOTERM_BP_DIRECT	GO:0097267~omega-hydroxylase P450 pathway	5	0.577367	0.000171	Q99N19, Q99N16, Q91WL5, Q9CX98, Q9EP75	828	8	20199	15.2468	0.440769	0.0181607	0.0179468
GOTERM_BP_DIRECT	GO:0070995~NADPH oxidation	5	0.577367	0.000298	P50285, Q61578, Q64669, P97872, P99029	828	9	20199	13.5527	0.636615	0.0301003	0.0297457
GOTERM_BP_DIRECT	GO:0006084~acetyl-CoA metabolic process	5	0.577367	0.000481	Q8JZK9, Q8BWT1, Q5SWU9, E9Q4Z2, P54869	828	10	20199	12.1975	0.804595	0.0453413	0.0448072
GOTERM_BP_DIRECT	GO:0033539~fatty acid beta-oxidation using acyl-CoA dehydrogenase	5	0.577367	0.00106094	Q07417, P51174, Q8K370, P50544, Q9DCW4	828	12	20199	10.1646	0.972809	0.0878766	0.0868416
GOTERM_BP_DIRECT	GO:0006957~complement activation, alternative pathway	5	0.577367	0.00148306	Q8BH35, P03953, P06683, P06909	828	13	20199	9.38266	0.993528	0.109489	0.108199
GOTERM_BP_DIRECT	GO:0009062~fatty acid catabolic process	5	0.577367	0.00148306	Q9WUR2, P51174, O08914, Q99PI5, P50544	828	13	20199	9.38266	0.993528	0.109489	0.108199
GOTERM_BP_DIRECT	GO:0051122~hepoxilin biosynthetic process	5	0.577367	0.00200945	P10649, P15626, P19157	828	14	20199	8.71247	0.99892	0.142169	0.140494
GOTERM_BP_DIRECT	GO:0042730~fibrinolysis	5	0.577367	0.00265209	Q9DBI0, E9PV24, Q8VCM7, Q08761, Q8K0E8	828	15	20199	8.13164	0.999879	0.169934	0.167932
GOTERM_BP_DIRECT	GO:0006744~ubiquinone biosynthetic process	5	0.577367	0.00265209	Q8R1S0, Q61578, Q566J8, Q9CXI0, Q8BMS4	828	15	20199	8.13164	0.999879	0.169934	0.167932
GOTERM_BP_DIRECT	GO:0006699~bile acid biosynthetic process	5	0.577367	0.00433231	O35488, O88962, P55096, Q9QXD1, Q60991	828	17	20199	7.17498	1	0.233532	0.230781
GOTERM_BP_DIRECT	GO:0006103~2-oxoglutarate metabolic process	5	0.577367	0.00539188	Q60597, Q91VA7, Q9D6R2, Q9WVM8, P54071	828	18	20199	6.77637	1	0.257899	0.254861
GOTERM_BP_DIRECT	GO:0010812~negative regulation of cell-substrate adhesion	5	0.577367	0.00539188	Q8BYA0, Q9QUI0, P16045, Q91ZX7, Q9WV69	828	18	20199	6.77637	1	0.257899	0.254861
GOTERM_BP_DIRECT	GO:0008209~androgen metabolic process	5	0.577367	0.00800076	Q8R084, O88736, P50171, Q8R0X7, P51658	828	20	20199	6.09873	1	0.331349	0.327446
GOTERM_BP_DIRECT	GO:0006783~heme biosynthetic process	5	0.577367	0.011323	O55022, P51175, P51163, P22315	828	22	20199	5.5443	1	0.385671	0.381128
GOTERM_BP_DIRECT	GO:0031396~regulation of protein ubiquitination	5	0.577367	0.011323	O35613, Q02248, P11499, Q8VDD8, Q9WUA5	828	22	20199	5.5443	1	0.385671	0.381128
GOTERM_BP_DIRECT	GO:0045333~cellular respiration	5	0.577367	0.015421	Q9CZ13, Q9QXX4, Q8R1I1, Q9DB77, Q9CPX8	828	24	20199	5.08228	1	0.436415	0.431275
GOTERM_BP_DIRECT	GO:0008637~apoptotic mitochondrial changes	5	0.577367	0.015421	P23492, Q9Z0X1, O09172, P48962, P63038	828	24	20199	5.08228	1	0.436415	0.431275
GOTERM_BP_DIRECT	GO:0042178~xenobiotic catabolic process	5	0.577367	0.0177774	P10649, P15626, Q64464, P41216, A6H6J2	828	25	20199	4.87899	1	0.468489	0.462971
GOTERM_BP_DIRECT	GO:0045921~positive regulation of exocytosis	5	0.577367	0.0293646	E9PV24, Q8VCM7, P20444, O55042, Q8K0E8	828	29	20199	4.20602	1	0.663139	0.655329
GOTERM_BP_DIRECT	GO:0010761~fibroblast migration	5	0.577367	0.0328188	O70400, P70182, Q60953, Q8R0X7, A2A8U2	828	30	20199	4.06582	1	0.705396	0.697088
GOTERM_BP_DIRECT	GO:0008210~estrogen metabolic process	5	0.577367	0.0365001	Q8R084, P50171, Q8R0X7, P17717, Q64464	828	31	20199	3.93467	1	0.765151	0.756139
GOTERM_BP_DIRECT	GO:0032691~negative regulation of interleukin-1 beta production	5	0.577367	0.0445474	Q60953, P19157, Q9D154	828	33	20199	3.6962	1	0.874469	0.864169
GOTERM_BP_DIRECT	GO:0045454~cell redox homeostasis	5	0.577367	0.0445474	P20108, Q64669, P99029, Q61171, Q8R180	828	33	20199	3.6962	1	0.874469	0.864169
GOTERM_BP_DIRECT	GO:0051085~chaperone mediated protein folding requiring cofactor	5	0.577367	0.0445474	P17879, P38647, P16627, Q8R180, Q61696	828	33	20199	3.6962	1	0.874469	0.864169
GOTERM_BP_DIRECT	GO:0042572~retinol metabolic process	5	0.577367	0.0583248	P00329, Q8VCH7, Q00724, Q9ERI6, Q9R092	828	36	20199	3.38818	1	1	0.988513
GOTERM_BP_DIRECT	GO:0030032~lamellipodium assembly	5	0.577367	0.0686296	Q6EDY6, Q5DU57, Q64727, Q9WV69, Q99M51	828	38	20199	3.20986	1	1	0.988513
GOTERM_BP_DIRECT	GO:0030168~platelet activation	5	0.577367	0.0686296	Q8K558, Q07235, E9PV24, Q8VCM7, Q8K0E8	828	38	20199	3.20986	1	1	0.988513
GOTERM_BP_DIRECT	GO:0070584~mitochondrion morphogenesis	5	0.577367	0.0741104	Q91VA6, Q811U4, Q3UBG2, Q9CYV5, Q9Z2C5	828	39	20199	3.12755	1	1	0.988513
GOTERM_BP_DIRECT	GO:0033574~response to testosterone	5	0.577367	0.085711	P14211, Q64669, P00329, Q9QXZ6, P54869	828	41	20199	2.97499	1	1	0.988513
GOTERM_BP_DIRECT	GO:1900026~positive regulation of substrate adhesion-dependent cell spreading	5	0.577367	0.0918225	Q8BUR4, Q6EDY6, P14211, B2RY04, O35658	828	42	20199	2.90416	1	1	0.988513
GOTERM_BP_DIRECT	GO:0050873~brown fat cell differentiation	5	0.577367	0.0981355	Q60994, P17563, Q91XL1, Q99P30, Q8R180	828	43	20199	2.83662	1	1	0.988513
GOTERM_BP_DIRECT	GO:1904109~positive regulation of cholesterol import	4	0.461894	0.000643	Q91ZX7, P32020, Q8VDD8	828	5	20199	19.5159	0.887355	0.0574424	0.0567658
GOTERM_BP_DIRECT	GO:0009890~negative regulation of biosynthetic process	4	0.461894	0.000643	P99025, P19157	828	5	20199	19.5159	0.887355	0.0574424	0.0567658
GOTERM_BP_DIRECT	GO:1901687~glutathione derivative biosynthetic process	4	0.461894	0.00124635	P10649, P19157	828	6	20199	16.2633	0.985524	0.0984323	0.0972729
GOTERM_BP_DIRECT	GO:0006102~isocitrate metabolic process	4	0.461894	0.00211478	Q91VA7, Q9D6R2, Q99KI0, P54071	828	7	20199	13.94	0.999245	0.143636	0.141944
GOTERM_BP_DIRECT	GO:0030449~regulation of complement activation	4	0.461894	0.00328097	Q64735, E9Q8B5, P06909, O35658	828	8	20199	12.1975	0.999986	0.195477	0.193174
GOTERM_BP_DIRECT	GO:0006703~estrogen biosynthetic process	4	0.461894	0.00661177	O88736, P50171, P51658, O70503	828	10	20199	9.75797	1	0.291605	0.28817
GOTERM_BP_DIRECT	GO:0046638~positive regulation of alpha-beta T cell differentiation	4	0.461894	0.00661177	P23492, Q9QUI0, Q9D0F4, P03958	828	10	20199	9.75797	1	0.291605	0.28817
GOTERM_BP_DIRECT	GO:0019363~pyridine nucleotide biosynthetic process	4	0.461894	0.00661177	Q91X91, Q8CC86, Q99JR6, Q78JT3	828	10	20199	9.75797	1	0.291605	0.28817
GOTERM_BP_DIRECT	GO:0009313~oligosaccharide catabolic process	4	0.461894	0.00881711	O09159, O35657, Q8R242, P20060	828	11	20199	8.87088	1	0.358744	0.354518
GOTERM_BP_DIRECT	GO:0046322~negative regulation of fatty acid oxidation	4	0.461894	0.0114025	P50285, P51174, E9Q4Z2, P50544	828	12	20199	8.13164	1	0.385671	0.381128
GOTERM_BP_DIRECT	GO:0032872~regulation of stress-activated MAPK cascade	4	0.461894	0.0114025	P97432, P19157	828	12	20199	8.13164	1	0.385671	0.381128
GOTERM_BP_DIRECT	GO:0031639~plasminogen activation	4	0.461894	0.0114025	Q8VCH6, E9PV24, Q8VCM7, Q8K0E8	828	12	20199	8.13164	1	0.385671	0.381128
GOTERM_BP_DIRECT	GO:0009435~NAD biosynthetic process	4	0.461894	0.0114025	Q91X91, Q8CC86, Q99JR6, Q78JT3	828	12	20199	8.13164	1	0.385671	0.381128
GOTERM_BP_DIRECT	GO:0033197~response to vitamin E	4	0.461894	0.0114025	P24270, Q03963, P03958	828	12	20199	8.13164	1	0.385671	0.381128
GOTERM_BP_DIRECT	GO:0043039~tRNA aminoacylation	4	0.461894	0.0143783	Q8CGC7, Q8BIP0, Q14CH7, Q9D0R2	828	13	20199	7.50613	1	0.436415	0.431275
GOTERM_BP_DIRECT	GO:0006122~mitochondrial electron transport, ubiquinol to cytochrome c	4	0.461894	0.0143783	Q9CZ13, Q8R1I1, Q9DB77, Q9CPX8	828	13	20199	7.50613	1	0.436415	0.431275
GOTERM_BP_DIRECT	GO:0000002~mitochondrial genome maintenance	4	0.461894	0.0143783	Q9CPR5, Q9JKF7, Q9D8P4, Q99N42	828	13	20199	7.50613	1	0.436415	0.431275
GOTERM_BP_DIRECT	GO:0034116~positive regulation of heterotypic cell-cell adhesion	4	0.461894	0.0143783	O08917, E9PV24, Q8VCM7, Q8K0E8	828	13	20199	7.50613	1	0.436415	0.431275
GOTERM_BP_DIRECT	GO:0034333~adherens junction assembly	4	0.461894	0.0177517	Q8BYA0, Q64727, Q02248, P63260	828	14	20199	6.96998	1	0.468489	0.462971
GOTERM_BP_DIRECT	GO:0043279~response to alkaloid	4	0.461894	0.0177517	Q64669, Q61823, Q9CZ13, Q03311	828	14	20199	6.96998	1	0.468489	0.462971
GOTERM_BP_DIRECT	GO:0006739~NADP metabolic process	4	0.461894	0.0177517	Q05920, Q00612, P54071, Q91X52	828	14	20199	6.96998	1	0.468489	0.462971
GOTERM_BP_DIRECT	GO:0031115~negative regulation of microtubule polymerization	4	0.461894	0.0177517	Q8BYA0, P30416, Q7TNG5, O55042	828	14	20199	6.96998	1	0.468489	0.462971
GOTERM_BP_DIRECT	GO:0035726~common myeloid progenitor cell proliferation	4	0.461894	0.0215265	Q9Z0M5, P19157	828	15	20199	6.50531	1	0.553819	0.547296
GOTERM_BP_DIRECT	GO:0006536~glutamate metabolic process	4	0.461894	0.0257044	Q9WVM8, Q8BH86, O09172, Q8BWF0	828	16	20199	6.09873	1	0.619067	0.611775
GOTERM_BP_DIRECT	GO:0046039~GTP metabolic process	4	0.461894	0.0257044	Q811U4, Q9QUI0, Q9WTP7, Q9WUR9	828	16	20199	6.09873	1	0.619067	0.611775
GOTERM_BP_DIRECT	GO:0006734~NADH metabolic process	4	0.461894	0.0302841	Q60597, Q91VA7, Q9D6R2, Q05920	828	17	20199	5.73998	1	0.663139	0.655329
GOTERM_BP_DIRECT	GO:0030194~positive regulation of blood coagulation	4	0.461894	0.0302841	Q99K41, Q61171, Q9WV69, Q91Y74	828	17	20199	5.73998	1	0.663139	0.655329
GOTERM_BP_DIRECT	GO:0043086~negative regulation of catalytic activity	4	0.461894	0.0302841	Q64669, Q8CAS9, E9Q4Z2, Q6ZQ38	828	17	20199	5.73998	1	0.663139	0.655329
GOTERM_BP_DIRECT	GO:0043508~negative regulation of JUN kinase activity	4	0.461894	0.0302841	Q61823, P19157	828	17	20199	5.73998	1	0.663139	0.655329
GOTERM_BP_DIRECT	GO:0009312~oligosaccharide biosynthetic process	4	0.461894	0.0302841	Q921V5, P15535, Q91Y74, Q9R0Q9	828	17	20199	5.73998	1	0.663139	0.655329
GOTERM_BP_DIRECT	GO:0090181~regulation of cholesterol metabolic process	4	0.461894	0.0302841	P97872, P51174, Q3U3R4, P50544	828	17	20199	5.73998	1	0.663139	0.655329
GOTERM_BP_DIRECT	GO:0051258~protein polymerization	4	0.461894	0.0352625	Q9D8B3, E9PV24, Q8VCM7, Q8K0E8	828	18	20199	5.4211	1	0.753155	0.744284
GOTERM_BP_DIRECT	GO:0051131~chaperone-mediated protein complex assembly	4	0.461894	0.0406346	Q9JK23, P11499, Q06890, Q8CGK3	828	19	20199	5.13577	1	0.826318	0.816586
GOTERM_BP_DIRECT	GO:0051693~actin filament capping	4	0.461894	0.0463935	P13020, P08032, P15508, Q9WV69	828	20	20199	4.87899	1	0.9003	0.889695
GOTERM_BP_DIRECT	GO:0051893~regulation of focal adhesion assembly	4	0.461894	0.052531	Q64727, P63260, Q9EP53, Q9D7X3	828	21	20199	4.64665	1	0.97147	0.960027
GOTERM_BP_DIRECT	GO:0035634~response to stilbenoid	4	0.461894	0.0590376	P10648, P01942, Q9QXZ6, P20852	828	22	20199	4.43544	1	1	0.988513
GOTERM_BP_DIRECT	GO:1901673~regulation of mitotic spindle assembly	4	0.461894	0.0590376	P17879, Q9D8B3, F6ZDS4, Q61696	828	22	20199	4.43544	1	1	0.988513
GOTERM_BP_DIRECT	GO:0030521~androgen receptor signaling pathway	4	0.461894	0.0590376	O35613, Q9QUI0, P30416, O08759	828	22	20199	4.43544	1	1	0.988513
GOTERM_BP_DIRECT	GO:0019432~triglyceride biosynthetic process	4	0.461894	0.0590376	P98192, Q8K3K7, P41216, Q99PI5	828	22	20199	4.43544	1	1	0.988513
GOTERM_BP_DIRECT	GO:0043149~stress fiber assembly	4	0.461894	0.0659025	O70400, Q9QUI0, Q9QVP9, O70309	828	23	20199	4.2426	1	1	0.988513
GOTERM_BP_DIRECT	GO:0006672~ceramide metabolic process	4	0.461894	0.0731141	P58021, Q61207, Q8R0X7, Q921I0	828	24	20199	4.06582	1	1	0.988513
GOTERM_BP_DIRECT	GO:0007009~plasma membrane organization	4	0.461894	0.0731141	P08032, P15508, G5E8K5, A2ASQ1	828	24	20199	4.06582	1	1	0.988513
GOTERM_BP_DIRECT	GO:0060392~negative regulation of SMAD protein import into nucleus	4	0.461894	0.0731141	Q9QUR7, Q99K41, Q91ZX7, Q9CXN7	828	24	20199	4.06582	1	1	0.988513
GOTERM_BP_DIRECT	GO:0008652~cellular amino acid biosynthetic process	4	0.461894	0.08066	Q61753, Q9DCC4, P11725, Q8VCN5	828	25	20199	3.90319	1	1	0.988513
GOTERM_BP_DIRECT	GO:0001659~temperature homeostasis	4	0.461894	0.0885271	Q64337, P51175, P51174, P50544	828	26	20199	3.75307	1	1	0.988513
GOTERM_BP_DIRECT	GO:0010288~response to lead ion	4	0.461894	0.0885271	P24270, Q00896, P22315	828	26	20199	3.75307	1	1	0.988513
GOTERM_BP_DIRECT	GO:0071353~cellular response to interleukin-4	4	0.461894	0.0967017	Q61830, Q60953, P11499, P27659	828	27	20199	3.61406	1	1	0.988513
GOTERM_BP_DIRECT	GO:0043686~co-translational protein modification	3	0.34642	0.00488628	P46978, S4R2K0, Q3TDQ1	828	3	20199	24.3949	1	0.247669	0.244751
GOTERM_BP_DIRECT	GO:2000429~negative regulation of neutrophil aggregation	3	0.34642	0.00488628	P19157	828	3	20199	24.3949	1	0.247669	0.244751
GOTERM_BP_DIRECT	GO:2000469~negative regulation of peroxidase activity	3	0.34642	0.00488628	P19157	828	3	20199	24.3949	1	0.247669	0.244751
GOTERM_BP_DIRECT	GO:0046501~protoporphyrinogen IX metabolic process	3	0.34642	0.00950735	P51175, P22315	828	4	20199	18.2962	1	0.358744	0.354518
GOTERM_BP_DIRECT	GO:0006172~ADP biosynthetic process	3	0.34642	0.00950735	Q9WTP7, Q9WUR9, Q9WTP6	828	4	20199	18.2962	1	0.358744	0.354518
GOTERM_BP_DIRECT	GO:2001294~malonyl-CoA catabolic process	3	0.34642	0.00950735	Q9CR24, Q99J39, Q99P30	828	4	20199	18.2962	1	0.358744	0.354518
GOTERM_BP_DIRECT	GO:0001998~angiotensin-mediated vasoconstriction involved in regulation of systemic arterial blood pressure	3	0.34642	0.00950735	Q9QUI0, Q00612, O54749	828	4	20199	18.2962	1	0.358744	0.354518
GOTERM_BP_DIRECT	GO:0071460~cellular response to cell-matrix adhesion	3	0.34642	0.0154171	P19157	828	5	20199	14.637	1	0.436415	0.431275
GOTERM_BP_DIRECT	GO:0036101~leukotriene B4 catabolic process	3	0.34642	0.0154171	Q99N19, Q99N16, Q9EP75	828	5	20199	14.637	1	0.436415	0.431275
GOTERM_BP_DIRECT	GO:0030209~dermatan sulfate catabolic process	3	0.34642	0.0154171	P50429, P20060, P29416	828	5	20199	14.637	1	0.436415	0.431275
GOTERM_BP_DIRECT	GO:0090114~COPII-coated vesicle budding	3	0.34642	0.0154171	Q9WV55, Q9D1M0, Q9D662	828	5	20199	14.637	1	0.436415	0.431275
GOTERM_BP_DIRECT	GO:0019853~L-ascorbic acid biosynthetic process	3	0.34642	0.0225024	Q64374, P45376, P58710	828	6	20199	12.1975	1	0.557798	0.551228
GOTERM_BP_DIRECT	GO:0070664~negative regulation of leukocyte proliferation	3	0.34642	0.0225024	P19157	828	6	20199	12.1975	1	0.557798	0.551228
GOTERM_BP_DIRECT	GO:0030207~chondroitin sulfate catabolic process	3	0.34642	0.0225024	P50429, P20060, P12265	828	6	20199	12.1975	1	0.557798	0.551228
GOTERM_BP_DIRECT	GO:0071672~negative regulation of smooth muscle cell chemotaxis	3	0.34642	0.0225024	P19157	828	6	20199	12.1975	1	0.557798	0.551228
GOTERM_BP_DIRECT	GO:0044242~cellular lipid catabolic process	3	0.34642	0.0306575	Q91ZX7, P51174, Q8VDQ8	828	7	20199	10.455	1	0.663139	0.655329
GOTERM_BP_DIRECT	GO:0006689~ganglioside catabolic process	3	0.34642	0.0306575	O35657, P20060, P29416	828	7	20199	10.455	1	0.663139	0.655329
GOTERM_BP_DIRECT	GO:0046033~AMP metabolic process	3	0.34642	0.0306575	Q9WTP7, Q9WUR9, Q9WTP6	828	7	20199	10.455	1	0.663139	0.655329
GOTERM_BP_DIRECT	GO:0006104~succinyl-CoA metabolic process	3	0.34642	0.0306575	Q60597, Q9Z2I9, Q9Z2I8	828	7	20199	10.455	1	0.663139	0.655329
GOTERM_BP_DIRECT	GO:0006105~succinate metabolic process	3	0.34642	0.0306575	Q9Z2I9, Q8BWF0, Q9Z2I8	828	7	20199	10.455	1	0.663139	0.655329
GOTERM_BP_DIRECT	GO:0072378~blood coagulation, fibrin clot formation	3	0.34642	0.039783	E9PV24, Q8VCM7, Q8K0E8	828	8	20199	9.1481	1	0.813874	0.804288
GOTERM_BP_DIRECT	GO:0006785~heme b biosynthetic process	3	0.34642	0.039783	P51175, P51163, P22315	828	8	20199	9.1481	1	0.813874	0.804288
GOTERM_BP_DIRECT	GO:0044209~AMP salvage	3	0.34642	0.039783	P23492, P08030, P03958	828	8	20199	9.1481	1	0.813874	0.804288
GOTERM_BP_DIRECT	GO:0090277~positive regulation of peptide hormone secretion	3	0.34642	0.049786	E9PV24, Q8VCM7, Q8K0E8	828	9	20199	8.13164	1	0.928975	0.918033
GOTERM_BP_DIRECT	GO:0055119~relaxation of cardiac muscle	3	0.34642	0.049786	P13020, O55143, P14094	828	9	20199	8.13164	1	0.928975	0.918033
GOTERM_BP_DIRECT	GO:0051771~negative regulation of nitric-oxide synthase biosynthetic process	3	0.34642	0.049786	P19157	828	9	20199	8.13164	1	0.928975	0.918033
GOTERM_BP_DIRECT	GO:0048034~heme O biosynthetic process	3	0.34642	0.049786	P51175, P51163, P22315	828	9	20199	8.13164	1	0.928975	0.918033
GOTERM_BP_DIRECT	GO:0032264~IMP salvage	3	0.34642	0.049786	P23492, P08030, P03958	828	9	20199	8.13164	1	0.928975	0.918033
GOTERM_BP_DIRECT	GO:0032873~negative regulation of stress-activated MAPK cascade	3	0.34642	0.049786	P19157	828	9	20199	8.13164	1	0.928975	0.918033
GOTERM_BP_DIRECT	GO:0032263~GMP salvage	3	0.34642	0.0605796	P23492, P08030, P03958	828	10	20199	7.31848	1	1	0.988513
GOTERM_BP_DIRECT	GO:0002674~negative regulation of acute inflammatory response	3	0.34642	0.0605796	P19157	828	10	20199	7.31848	1	1	0.988513
GOTERM_BP_DIRECT	GO:0060054~positive regulation of epithelial cell proliferation involved in wound healing	3	0.34642	0.0605796	P97792, Q91XL1, P15535	828	10	20199	7.31848	1	1	0.988513
GOTERM_BP_DIRECT	GO:0015671~oxygen transport	3	0.34642	0.0605796	P01942, P15327, P02104	828	10	20199	7.31848	1	1	0.988513
GOTERM_BP_DIRECT	GO:0006784~heme a biosynthetic process	3	0.34642	0.0605796	P51175, P51163, P22315	828	10	20199	7.31848	1	1	0.988513
GOTERM_BP_DIRECT	GO:0006782~protoporphyrinogen IX biosynthetic process	3	0.34642	0.0605796	P51175, P51163	828	10	20199	7.31848	1	1	0.988513
GOTERM_BP_DIRECT	GO:0071638~negative regulation of monocyte chemotactic protein-1 production	3	0.34642	0.0605796	P19157	828	10	20199	7.31848	1	1	0.988513
GOTERM_BP_DIRECT	GO:0006474~N-terminal protein amino acid acetylation	3	0.34642	0.0605796	Q6PHQ8, Q6PGB6, Q80UM3	828	10	20199	7.31848	1	1	0.988513
GOTERM_BP_DIRECT	GO:0034383~low-density lipoprotein particle clearance	3	0.34642	0.0720824	Q60994, Q8VDD8, Q8C142	828	11	20199	6.65316	1	1	0.988513
GOTERM_BP_DIRECT	GO:0006825~copper ion transport	3	0.34642	0.0842184	P30416, Q8K273, Q64446	828	12	20199	6.09873	1	1	0.988513
GOTERM_BP_DIRECT	GO:0006091~generation of precursor metabolites and energy	3	0.34642	0.0969165	Q60597, Q9DC50, Q99K67	828	13	20199	5.6296	1	1	0.988513
GOTERM_BP_DIRECT	GO:0046166~glyceraldehyde-3-phosphate biosynthetic process	3	0.34642	0.0969165	Q05920, Q9Z2V4, S4R1W1	828	13	20199	5.6296	1	1	0.988513
GOTERM_BP_DIRECT	GO:0006098~pentose-phosphate shunt	3	0.34642	0.0969165	Q00612, E9Q4Z2, Q9CQ60	828	13	20199	5.6296	1	1	0.988513
GOTERM_BP_DIRECT	GO:0034620~cellular response to unfolded protein	3	0.34642	0.0969165	O35613, Q9JLV1, Q99J56	828	13	20199	5.6296	1	1	0.988513
GOTERM_BP_DIRECT	GO:0048312~intracellular distribution of mitochondria	3	0.34642	0.0969165	Q811U4, Q9D7A8, Q5SW19	828	13	20199	5.6296	1	1	0.988513
GOTERM_BP_DIRECT	GO:0031953~negative regulation of protein autophosphorylation	3	0.34642	0.0969165	Q60994, Q9EQK5, O55091	828	13	20199	5.6296	1	1	0.988513
GOTERM_BP_DIRECT	GO:0015937~coenzyme A biosynthetic process	3	0.34642	0.0969165	Q8C0K5, Q8R0Y8, Q9DBL7	828	13	20199	5.6296	1	1	0.988513
GOTERM_BP_DIRECT	GO:0030451~regulation of complement activation, alternative pathway	2	0.230947	0.0802109	E9Q8B5, P06909	828	2	20199	24.3949	1	1	0.988513
GOTERM_BP_DIRECT	GO:0002536~respiratory burst involved in inflammatory response	2	0.230947	0.0802109	Q9Z0M5, Q61171	828	2	20199	24.3949	1	1	0.988513
GOTERM_BP_DIRECT	GO:0032385~positive regulation of intracellular cholesterol transport	2	0.230947	0.0802109	P32020	828	2	20199	24.3949	1	1	0.988513
GOTERM_BP_DIRECT	GO:0019285~glycine betaine biosynthetic process from choline	2	0.230947	0.0802109	Q8BJ64, Q9DBF1	828	2	20199	24.3949	1	1	0.988513
GOTERM_BP_DIRECT	GO:0034201~response to oleic acid	2	0.230947	0.0802109	P41216, Q9D2R0	828	2	20199	24.3949	1	1	0.988513
GOTERM_BP_DIRECT	GO:0019391~glucuronoside catabolic process	2	0.230947	0.0802109	Q6PE15, P12265	828	2	20199	24.3949	1	1	0.988513
GOTERM_BP_DIRECT	GO:2001295~malonyl-CoA biosynthetic process	2	0.230947	0.0802109	Q5SWU9, E9Q4Z2	828	2	20199	24.3949	1	1	0.988513
GOTERM_BP_DIRECT	GO:1903371~regulation of endoplasmic reticulum tubular network organization	2	0.230947	0.0802109	Q9CR67, Q9JKW0	828	2	20199	24.3949	1	1	0.988513
GOTERM_BP_DIRECT	GO:0046496~nicotinamide nucleotide metabolic process	2	0.230947	0.0802109	Q9CZ42, Q8K4Z3	828	2	20199	24.3949	1	1	0.988513
GOTERM_BP_DIRECT	GO:0010142~farnesyl diphosphate biosynthetic process, mevalonate pathway	2	0.230947	0.0802109	Q8JZK9, P54869	828	2	20199	24.3949	1	1	0.988513
GOTERM_BP_DIRECT	GO:2001304~lipoxin B4 metabolic process	2	0.230947	0.0802109	Q99N19, Q99N16	828	2	20199	24.3949	1	1	0.988513
GOTERM_BP_DIRECT	GO:0080184~response to phenylpropanoid	2	0.230947	0.0802109	P24270	828	2	20199	24.3949	1	1	0.988513
GOTERM_BP_DIRECT	GO:1902859~propionyl-CoA catabolic process	2	0.230947	0.0802109	Q9CR24, Q99P30	828	2	20199	24.3949	1	1	0.988513
GOTERM_BP_DIRECT	GO:0045940~positive regulation of steroid metabolic process	2	0.230947	0.0802109	P32020	828	2	20199	24.3949	1	1	0.988513
GOTERM_BP_DIRECT	GO:0006433~prolyl-tRNA aminoacylation	2	0.230947	0.0802109	Q8CGC7, Q8CFI5	828	2	20199	24.3949	1	1	0.988513

## Sheet: Muscle_raw
Uniprot ID	Genes	M1	M3	M4	M5	M6	M7	M8	M9	M11	M12	M13	M14	M15	M16
		AL	AL	AL	AL	AL	AL	AL	IF16	IF16	IF16	IF16	IF16	IF16	IF16
Q9CQV8	Ywhab	91769.8	75190.3	676173	NA	92886	54776.1	150155	127112	129371	65860.6	100225	327863	70394.6	75045
P62259	Ywhae	12900000	10000000	16500000	7740000	13200000	12500000	22300000	17400000	12200000	14000000	10400000	20500000	14300000	14800000
P68510	Ywhah	159911	231857	288276	132825	233635	373194	530288	183414	173829	263256	181131	509574	302663	167172
P61982	Ywhag	3530000	2130000	3510000	2110000	2620000	2960000	3280000	2500000	2800000	3460000	3600000	6490000	4070000	2550000
P68254	Ywhaq	381445	92670.8	548726	NA	629185	591013	726195	327348	191681	319873	232764	348383	308495	973651
P63101	Ywhaz	3790000	2210000	6790000	1910000	5130000	5310000	8340000	2790000	3390000	3900000	3550000	11100000	10600000	5840000
Q6PD03	Ppp2r5a	506022	599802	684953	428894	592820	667697	631456	624682	543870	562406	662368	1010000	828442	698159
Q6PD28	Ppp2r5b	1870000	1690000	1910000	1860000	1720000	1920000	2260000	1910000	1470000	1810000	1470000	3730000	1990000	2180000
Q61151	Ppp2r5e	284668	306662	434525	375469	415842	422939	833934	374127	350863	350936	389431	1080000	767114	309567
Q60996	Ppp2r5c	77716	75332	NA	63888.9	102273	147048	80835.3	NA	NA	NA	73384.3	373746	229481	84494.1
Q76MZ3	Ppp2r1a	5890000	3400000	4810000	3590000	4890000	4730000	4900000	5060000	4150000	4060000	3580000	4970000	4880000	7010000
Q6P1F6	Ppp2r2a	1490000	1950000	2050000	1740000	2140000	1730000	1300000	2050000	1700000	2260000	2070000	3450000	1950000	1890000
Q925E7	Ppp2r2d	335881	319287	308384	332860	364030	314658	175926	380501	362098	391325	378251	146767	295151	294834
Q8BG02	Ppp2r2c	NA	NA	NA	NA	NA	NA	123684	NA	NA	NA	NA	187729	193199	NA
Q99L13	Hibadh	2930000	1630000	2120000	2060000	2050000	1660000	1620000	1930000	1770000	1550000	2210000	2930000	2680000	1560000
P10852	Slc3a2	640326	969278	1280000	800509	1220000	1820000	1850000	695157	776590	1000000	1210000	5450000	2960000	974418
Q91VK1	Bzw2	1360000	1370000	1110000	1390000	1200000	1460000	1180000	1720000	1680000	1980000	1260000	1580000	1270000	1650000
Q9CQC6	Bzw1	554694	351307	561345	599268	553305	574160	416316	NA	547446	629980	1000000	556917	708977	544039
A3KFX0	Nt5c1a	1030000	1430000	997951	1220000	779667	1430000	786104	1160000	1260000	1520000	1300000	870018	1070000	1230000
Q9D020	Nt5c3a	1110000	1200000	688147	765662	522800	1090000	591375	1870000	652185	603761	694395	654869	703729	1140000
Q9DCD0	Pgd	1750000	1530000	2000000	1470000	1530000	1980000	1930000	2400000	3070000	1670000	3510000	2200000	2280000	1610000
Q9CQ60	Pgls	1270000	1010000	1190000	853116	928306	1420000	1360000	1280000	1390000	1360000	1110000	1100000	847960	1680000
A0A075B5J9;A0A075B5K3	Igkv17-121;Igkv17-127	NA	944557	950650	686788	NA	1540000	1280000	NA	2120000	1280000	1010000	NA	653000	NA
A0A075B5K8;A0A075B5N0;A0A0B4J1I0;A0A140T8M0;A0A140T8M9;A0A140T8N1	Igkv1-110;Igkv1-117;Igkv1-122;Igkv1-35;Igkv1-88;Igkv1-99	NA	NA	NA	NA	NA	NA	91424.9	NA	NA	NA	NA	NA	NA	187884
A0A075B5M7	Igkv5-39	509032	404468	400913	NA	66388.3	NA	449037	338571	484964	NA	NA	132989	NA	NA
A0A075B5P8	Ighv2-2	NA	NA	NA	NA	NA	NA	NA	NA	NA	NA	NA	NA	NA	NA
A0A075B5Q6	Ighv5-9-1	90121.3	NA	62654	NA	NA	49041.8	168442	NA	134203	NA	NA	NA	NA	NA
A0A075B5R2;A0A075B5R3	Ighv7-2;Ighv7-3	170171	68230.4	234266	220403	175229	241854	97230.9	145617	270683	117759	266446	155770	166660	405386
A0A075B5R5	Ighv4-1	NA	NA	NA	NA	NA	NA	NA	NA	NA	58352.9	NA	NA	NA	NA
A0A075B5T2	Ighv6-3	NA	39529.4	NA	NA	NA	NA	NA	NA	160490	NA	120021	NA	126900	113917
A0A075B5U4	Ighv1-18	NA	NA	111585	NA	NA	NA	NA	NA	57332.2	NA	NA	NA	NA	NA
A0A075B5V0	Ighv1-26	NA	NA	NA	NA	NA	NA	NA	NA	NA	NA	NA	NA	NA	NA
A0A075B5V1;A0A075B5V6	Ighv1-31;Ighv1-42	192511	183515	549802	197463	116191	209490	299085	272030	519333	182062	111712	162327	212911	191040
A0A075B5W9	Ighv1-58	NA	NA	NA	NA	NA	NA	NA	NA	NA	116045	NA	NA	NA	NA
A0A075B5Y0	Ighv8-13	NA	NA	79556	NA	NA	NA	NA	NA	NA	NA	NA	NA	NA	NA
A0A075B666;A0A140T8N3	Igkv13-84;Igkv13-85	NA	NA	854698	NA	NA	NA	NA	NA	150515	NA	NA	NA	NA	NA
A0A075B680	Ighv1-62-2	152238	101160	4530000	NA	NA	NA	NA	NA	NA	NA	NA	NA	NA	NA
A0A087WR45	Prob1	875115	863844	748392	851811	838477	561136	736601	916666	572402	748544	470768	473779	761337	542446
A0A0A6YXQ0	Ighv8-8	NA	NA	NA	NA	24060.7	NA	NA	NA	NA	NA	NA	NA	NA	NA
A0A0A6YXW6	Igha	225397	655073	444639	358639	156513	436663	532229	329861	697914	314048	804672	475457	363940	NA
A0A0A6YYE7	Igkv4-57	NA	40168.5	58820.8	NA	37699.1	105616	145913	71366.1	152924	NA	NA	NA	76481.6	49648.1
A0A0G2JE99	Iglc1	226355	NA	NA	NA	NA	NA	NA	NA	918529	NA	NA	NA	118589	216379
A0A140T8M1	Igkv10-96	NA	78823	188252	94180.3	NA	88182.1	NA	185928	NA	65191.4	50959.8	NA	146970	NA
A0A140T8N5	Igkv6-23	279080	313416	464932	188554	NA	167938	672581	451559	522975	374981	NA	NA	NA	NA
A0A140T8P6	Igkv12-46	NA	NA	NA	NA	NA	160971	NA	147394	NA	NA	NA	NA	NA	NA
A0A1W2P7J1	Coq10a	3810000	2030000	2840000	3030000	3690000	2180000	1540000	1930000	1810000	1560000	1670000	2720000	2270000	1290000
A0A1Y7VJN6	Ighg3	481834	452500	1200000	782080	801543	1580000	2150000	1300000	788935	1050000	1160000	590177	719358	1020000
A0A286YCX6	Trappc8	NA	NA	80971	NA	116543	22020.9	NA	40742.4	NA	NA	180027	76881.5	94703.8	NA
A0A2I3BRZ3	Klhl33	57225.4	46311.2	31653.4	56570.8	39479.3	NA	74570.6	27601.2	NA	18338.9	49494.1	34813.4	55156	NA
A0A2R8VKG2	D430041D05Rik	85803.4	NA	34069.9	NA	NA	NA	NA	NA	NA	NA	NA	508618	192335	NA
A0A338P6S8	Abi3bp	345514	721232	628663	656318	414059	385150	469782	488337	946630	393900	352855	317116	501261	381038
A0A571BD48	Dnah7b	NA	NA	NA	NA	99707.6	NA	NA	NA	NA	259964	222392	NA	NA	NA
A0A571BEN1	Mybpc1	68700000	54200000	77300000	93200000	69700000	32300000	85200000	45100000	41400000	40200000	37900000	58000000	67400000	46000000
A0A571BF58	Neb	196000000	234000000	184000000	198000000	190000000	193000000	145000000	197000000	207000000	222000000	203000000	149000000	152000000	184000000
A0A5F8MPH8	Tnxb	1800000	2300000	2820000	2020000	1420000	1880000	2710000	1720000	2480000	1810000	1670000	1480000	1470000	1200000
A0A6I8MWX0	Fndc1	NA	490836	595602	NA	143417	436776	144928	335876	1040000	366577	144181	366560	398530	271466
A0A7N9VR94	Ahnak2	1080000	962670	994891	1040000	829839	1190000	953775	1210000	1400000	918981	816524	999463	1280000	761692
Q571I9	Aldh16a1	119198	182903	54130.1	NA	68093.1	111255	NA	84119.7	68236.5	63662.7	48426.3	NA	240607	NA
Q60590	Orm1	336618	423116	779074	520239	360827	399148	315895	348816	612167	393786	655945	505191	351116	435642
P22599	Serpina1b	5250000	4500000	5680000	2920000	3490000	4040000	5630000	3960000	3880000	4140000	2610000	3460000	3810000	2350000
Q00896	Serpina1c	13300000	11700000	18800000	11400000	9280000	10500000	13300000	11300000	12100000	9740000	11500000	7690000	8530000	6320000
Q00897	Serpina1d	60800000	43900000	60800000	39300000	34500000	49000000	69000000	59100000	46000000	43400000	38500000	29700000	43300000	34900000
Q00898	Serpina1e	4510000	3620000	3280000	4290000	1850000	4070000	4690000	3010000	3170000	3190000	3940000	1250000	1850000	1800000
Q19LI2	A1bg	NA	65131.7	NA	NA	NA	NA	NA	NA	NA	NA	NA	NA	NA	NA
A2A9K7	Cnksr1	508494	612054	544063	1020000	648919	501629	NA	809012	1220000	834638	573817	253210	472123	1240000
Q61247	Serpinf2	1740000	1190000	2340000	1030000	1420000	1370000	1540000	2090000	2060000	692519	1990000	839436	1040000	925263
A2RTH5	Lcmt1	357887	482143	604711	363095	491409	493608	624317	552777	554413	493109	536956	865363	658853	423704
P12023	App	NA	91089.2	163655	88775.4	163958	210479	237200	735524	83770.2	783713	102671	798084	364659	NA
A6ZI46	Aldoart1	2150000	2120000	1500000	1730000	2340000	2130000	1290000	3300000	2180000	1790000	2120000	1740000	1250000	1630000
A8DUK4	Hbb-bs	45100000	9130000	13100000	6580000	12000000	15000000	31400000	16200000	19300000	18400000	13600000	17400000	16500000	25200000
P51912	Slc1a5	207176	170679	578869	248604	NA	422789	3110000	489587	1010000	413892	1020000	491649	369567	262345
Q9D2R0	Aacs	316100	220577	333198	319618	340032	429480	900695	753811	671721	271681	1700000	780559	471467	273874
Q3UHJ0	Aak1	468403	478996	877914	337388	716872	800829	1440000	428473	388388	489977	540831	4290000	2030000	552674
Q6PAM0	Prkab2	614746	839306	486040	291549	616830	413831	382803	540087	343141	475733	411231	358933	303781	598902
O54950	Prkag1	560776	372393	378160	337634	392439	300320	424270	533633	376586	384905	533327	220724	334283	460971
Q8BGM7	Prkag3	1540000	2550000	2000000	2240000	1790000	1270000	516182	2420000	2170000	1500000	1860000	1410000	704887	1220000
Q8R0P4	Aamdc	904886	829128	690229	931905	607633	952303	1130000	628362	701977	604476	482189	711998	608447	955747
Q5EG47	Prkaa1	339375	350085	333885	NA	403212	277007	385010	315216	238755	380280	344157	637732	505558	NA
Q8BRK8	Prkaa2	1500000	1770000	1580000	1480000	1430000	1790000	1220000	1880000	1740000	1650000	1620000	1340000	1300000	1850000
Q3THG9	Aarsd1	841949	912151	1400000	1310000	1160000	1040000	1020000	1390000	1220000	1190000	921833	1170000	1500000	1170000
P05201	Got1	36800000	27600000	26600000	38700000	42300000	31100000	32800000	24100000	22200000	22600000	25000000	34100000	35200000	31700000
P05202	Got2	92700000	59700000	62800000	76400000	95300000	60300000	65200000	52500000	53400000	51700000	49100000	81000000	82700000	57600000
Q7M759	Abhd17b	NA	71687.5	NA	NA	NA	NA	117817	NA	NA	NA	NA	257542	112650	NA
Q8K440	Abca8b	97399	136306	97069	123374	156914	107764	180285	149364	194467	156015	167175	143903	131155	189912
Q8K441;Q8K449	Abca6;Abca9	50606	297813	195093	189160	235678	226175	259935	178875	237652	178011	188741	201925	81775.3	211650
Q61102	Abcb7	560744	433302	360351	386204	652116	455046	461482	407152	276664	455943	334489	562301	558487	386711
P70170	Abcc9	741229	912980	723924	770552	835252	848681	677366	948093	884936	762713	781850	582222	755529	1070000
P48410	Abcd1	160235	186310	147162	184973	310789	102186	NA	84595.4	233501	60290.7	108977	187027	NA	204248
Q61285	Abcd2	220470	378198	345474	503441	567016	415495	303024	592730	382047	609489	527980	479378	915250	516799
P55096	Abcd3	519446	488202	470284	793534	633969	616068	688747	550024	500057	679004	873220	716250	695357	623888
P61222	Abce1	845130	1090000	931126	884379	958106	948017	753402	900941	958687	945361	858905	913939	830525	842070
Q6P542	Abcf1	659408	394766	435766	396021	612949	539548	371154	474779	536362	454844	448420	551795	385647	517382
Q99LE6	Abcf2	880605	860519	826454	826216	850205	969187	692841	799792	848710	974741	1000000	871931	853460	924999
Q8K268	Abcf3	446175	519584	475803	433218	419489	527936	336557	502126	503364	525880	457672	549411	388399	500624
Q7TMS5	Abcg2	695466	726433	500900	582944	402133	828155	317018	732832	757688	792937	897996	1960000	1010000	254498
Q99LR1	Abhd12	474719	507528	630690	404865	398015	566024	695790	419653	363648	458339	614717	1370000	784385	474987
Q9WV35	Apobec2	18400000	15600000	19900000	15500000	15100000	15300000	18500000	20000000	13200000	17200000	14900000	10000000	13000000	16700000
Q9DBL9	Abhd5	347090	145822	330608	208030	331624	271643	1020000	668392	371347	250338	544150	231489	141114	NA
Q8R2Y0	Abhd6	128440	91999.5	166481	117589	159499	79313.5	NA	111349	NA	85657.4	231183	542151	176556	36210.5
Q6PE15	Abhd10	105754	NA	49043.5	55577.8	42551.4	NA	182156	69317.4	NA	NA	NA	56693.3	96747.5	53797.9
Q8K4F5	Abhd11	657627	201677	233837	212213	256724	204465	214635	271393	184883	187701	132684	393861	96525.1	357333
Q8VCR7	Abhd14b	61007.1	NA	80262.7	81334.1	93823.7	110947	NA	74630.9	NA	81812.9	84975.4	62577.8	30460.1	52135.5
Q9Z1Q2	Abhd16a	947057	1150000	1410000	1080000	1370000	1220000	1170000	1330000	1440000	1650000	1300000	1390000	1530000	1290000
Q8CBW3	Abi1	216265	209842	263964	229781	253062	484135	433240	148571	137754	290363	270265	1470000	521771	249276
P62484	Abi2	392531	NA	385529	580655	331888	521132	811241	NA	413078	322822	396452	2110000	908339	552879
Q8K4G5	Ablim1	130180	179713	164343	168855	161812	193925	279219	178785	143176	172234	144043	343883	367399	163567
Q8BL65	Ablim2	652586	975701	853628	689383	825720	957421	734806	589830	644309	648919	720291	1500000	1170000	605599
Q5SSL4	Abr	NA	99349.9	375823	49532.4	64410.1	248633	525500	NA	NA	179129	94214.9	815212	522697	279249
Q5SWU9	Acaca	429847	815793	451375	531609	443828	1430000	714658	1700000	1950000	657055	3690000	1490000	851283	814947
E9Q4Z2	Acacb	1670000	1470000	1640000	1830000	1810000	1760000	1270000	2010000	2330000	1820000	2530000	1530000	1430000	1740000
Q9D7B6	Acad8	1510000	1340000	1560000	1790000	1840000	1480000	1530000	1020000	1530000	1380000	1410000	1490000	1610000	1470000
Q8JZN5	Acad9	2450000	2070000	2010000	2070000	2310000	2170000	2200000	2210000	1870000	2020000	1860000	2320000	2300000	1840000
P51174	Acadl	18700000	9230000	8070000	14700000	14100000	10200000	10700000	9580000	8480000	7920000	10300000	11300000	12200000	11200000
P45952	Acadm	10800000	5810000	6880000	8350000	9060000	5560000	4640000	5750000	4920000	5360000	5870000	8390000	6560000	4790000
Q07417	Acads	8060000	4660000	4780000	5640000	6710000	4820000	4780000	4820000	4290000	4230000	5820000	4380000	4350000	4230000
P50544	Acadvl	17400000	8500000	8670000	12000000	13200000	8630000	8410000	7430000	7290000	7450000	8010000	8620000	10200000	8200000
Q6ZQK5	Acap2	NA	NA	NA	NA	NA	NA	NA	NA	NA	NA	NA	181769	71634.4	NA
Q99PU5	Acsbg1	NA	NA	240699	NA	500273	NA	315933	NA	NA	NA	NA	1180000	948354	NA
P31786	Dbi	3200000	2810000	4430000	2770000	3640000	3600000	7200000	4400000	3210000	4080000	3080000	3260000	2330000	5230000
Q8K370	Acad10	2340000	1000000	866367	1620000	1960000	1350000	1200000	1990000	862438	923335	996794	1250000	1010000	1010000
Q80XL6	Acad11	1870000	1670000	1380000	1510000	1810000	1300000	1390000	1510000	1640000	1020000	2100000	1370000	1260000	1150000
Q9DBL1	Acadsb	1580000	1360000	1330000	1550000	1590000	1390000	1150000	1280000	1220000	1190000	1390000	1500000	1520000	1460000
P09470	Ace	705703	963893	707312	559842	610977	661391	732732	577747	916798	688229	762973	425253	639364	683923
P21836	Ache	550003	688351	488678	713618	618460	783518	522523	621685	655816	615549	543826	736233	817727	645941
Q9JIX8	Acin1	NA	443800	612240	358300	359934	438023	509110	365255	378170	499825	304937	558993	181110	219795
Q9Z2N8	Actl6a	440769	618347	476402	493807	388476	352963	369559	479010	421951	429995	481157	510371	444182	427751
Q99MR0	Actl6b	NA	NA	NA	NA	25709	NA	NA	NA	NA	NA	NA	257098	74392.8	NA
Q91V92	Acly	347869	539409	730929	496373	722882	977931	1260000	2950000	3320000	983558	10300000	4380000	2280000	631942
Q8VHQ9	Acot11	85729.7	NA	NA	42298.8	101841	39010.1	72966.3	NA	NA	NA	87152.7	267485	134543	NA
Q9CQR4	Acot13	2420000	1250000	2340000	1640000	2500000	1580000	1950000	1840000	1360000	1290000	641337	1820000	1340000	1100000
P28271	Aco1	1400000	1580000	1390000	1550000	1380000	1440000	1520000	1570000	1380000	1240000	1610000	1920000	1440000	1320000
Q99KI0	Aco2	95700000	69100000	78300000	90100000	97200000	72700000	70500000	72600000	71200000	73200000	60100000	82100000	81700000	69100000
Q9QYR9	Acot2	3140000	1330000	1540000	1810000	2320000	1650000	1600000	2260000	1750000	1280000	1950000	2120000	1760000	1750000
Q9R0X4	Acot9	768541	870013	656891	819373	813330	959775	728240	785337	734172	694076	693779	1420000	834409	756465
Q9R0H0	Acox1	990402	668533	795617	1090000	971847	559953	784410	1180000	820581	686363	1280000	1260000	869341	387578
Q8R146	Apeh	1290000	1240000	969783	1270000	1200000	1150000	922055	1340000	1120000	1440000	1310000	941787	1010000	1080000
Q9CR21	Ndufab1	1770000	710244	674237	495617	123031	401662	1020000	423222	NA	294159	537469	387850	243761	1390000
Q99NB1	Acss1	742510	647082	452106	797056	750575	582927	871589	410495	451592	734996	343602	1290000	885362	689753
Q9QXG4	Acss2	213127	262305	245084	183532	146850	274629	280463	220213	321758	212264	621957	486445	350967	293308
Q8VCW8	Acsf2	395143	332187	561053	247387	311289	469180	483514	379263	584441	NA	792946	2390000	1180000	410633
Q3URE1	Acsf3	438840	244966	349319	354369	311924	192024	347834	268526	265482	283449	380506	309490	339226	347742
P41216	Acsl1	17400000	9700000	10500000	15000000	16800000	9890000	10000000	9750000	10600000	8940000	12000000	11400000	11300000	10500000
Q9CZW4	Acsl3	1440000	2090000	1670000	2060000	1820000	1870000	1550000	1810000	2320000	2130000	2460000	2160000	1860000	2260000
Q9QUJ7	Acsl4	341504	626994	483427	626510	256441	485354	450070	300138	600348	418260	438556	589429	537408	683071
Q91WC3	Acsl6	4550000	5220000	5060000	4320000	5440000	5690000	5960000	3280000	3580000	3980000	4440000	14600000	8370000	4250000
Q14DH7	Acss3	151288	195124	202251	221091	203737	229428	186194	268466	385012	169486	370515	162195	192746	237767
P60710	Actb	35900000	34500000	53400000	36800000	50500000	47200000	52200000	42500000	36100000	40500000	41300000	79800000	55800000	44900000
Q8BFZ3	Actbl2	22400000	23100000	19500000	16400000	16500000	21400000	21300000	27300000	27600000	22700000	30000000	19500000	17300000	25100000
P63268	Actg2	4180000	3970000	3240000	2160000	2570000	3730000	2060000	6000000	2680000	3220000	4320000	2430000	2450000	4280000
Q7TPR4	Actn1	9900000	8810000	10600000	7920000	10500000	11300000	13700000	8950000	9070000	9280000	10400000	36000000	24600000	9060000
Q9JI91	Actn2	70500000	42300000	52100000	64200000	59500000	41300000	40400000	41000000	32900000	39300000	22800000	48300000	57600000	43300000
O88990	Actn3	277000000	313000000	247000000	267000000	218000000	241000000	159000000	381000000	292000000	317000000	371000000	216000000	208000000	271000000
P57780	Actn4	1160000	1190000	1230000	1060000	1080000	1200000	1480000	1310000	1480000	1300000	1270000	2700000	2030000	1190000
P68134	Acta1	1290000000	1320000000	1210000000	1120000000	1010000000	1150000000	877000000	1650000000	1200000000	1310000000	1440000000	1080000000	1090000000	1080000000
Q8R5C5	Actr1b	549505	436729	615266	366539	530452	648719	806990	341222	344066	534773	563861	754209	1020000	451044
P61164	Actr1a	1870000	1460000	2470000	1470000	1740000	1990000	1950000	1560000	1570000	1430000	1960000	3290000	2730000	1790000
P56376	Acyp1	671262	1370000	1540000	712220	NA	1030000	1250000	1230000	NA	1130000	1080000	974998	1090000	802354
P56375	Acyp2	7840000	10400000	10800000	8710000	8670000	8400000	5160000	8360000	10100000	8250000	7440000	6160000	7140000	6980000
Q9R1V6	Adam22	NA	NA	499710	NA	367746	739533	953406	NA	NA	317958	1070000	2870000	2240000	110182
Q9R1V7	Adam23	NA	NA	1140000	NA	936844	855235	798781	NA	NA	650211	610077	2210000	943913	NA
Q9D0L4	Adck1	436727	373895	289488	397176	561898	465432	527403	450942	427266	405288	444388	534854	434166	404824
Q80TL1	Adcy2	90013.8	31350.1	131084	68444.7	13235.6	14227.9	193846	NA	105337	168234	76366.5	70907.1	33404.1	NA
P84309	Adcy5	44237.3	59837.4	87429.4	28009.7	149213	257307	221393	65713.5	74230.1	123394	90600.2	170560	274613	86452
P51830	Adcy9	226363	117788	229639	185530	257547	213507	149367	147258	125373	160437	184445	412563	189917	76227.9
Q9QYC0	Add1	832515	962860	1500000	711562	1340000	2000000	2210000	732630	839410	932733	1230000	6910000	3860000	1090000
Q9QYB8	Add2	300927	1060000	1070000	NA	1430000	1170000	1630000	1390000	868429	549352	991300	4830000	2750000	639062
Q9QYB5	Add3	463004	517832	586491	451550	499987	753042	662075	570629	550274	394248	518165	2030000	955367	615335
P00329	Adh1	1760000	1390000	1650000	1460000	1830000	1370000	1390000	1430000	1770000	1350000	1300000	1290000	1320000	1290000
P28474	Adh5	2460000	2750000	3180000	3140000	3260000	2790000	2580000	2710000	3820000	3260000	3230000	2980000	2320000	3590000
Q60994	Adipoq	2610000	3980000	3030000	2540000	3330000	741528	5180000	2990000	3620000	3860000	4090000	3190000	3160000	2520000
P55264	Adk	1910000	1470000	1770000	1740000	1590000	1180000	1650000	1330000	1320000	1390000	1490000	2710000	2130000	1400000
Q8VDL4	Adpgk	379445	438341	384552	430376	435591	639677	277416	511085	415733	456234	470279	495102	383024	223138
P54923	Adprh	887871	961871	637175	722155	622552	710326	790379	939310	506455	867537	730446	1120000	708336	652634
Q9JKV1	Adrm1	318055	698523	723605	592548	699828	809693	1010000	613496	649907	1110000	660637	979824	682668	1190000
P48962	Slc25a4	196000000	135000000	129000000	172000000	183000000	135000000	109000000	112000000	125000000	117000000	108000000	130000000	120000000	130000000
P51881	Slc25a5	7540000	5930000	8420000	6380000	8620000	9840000	15300000	6950000	6690000	5250000	8380000	36400000	22100000	7240000
Q6PDY2	Ado	201676	210841	269366	222428	136838	259409	316256	206387	127134	209334	290298	292779	314802	168360
Q9QZQ1	Afdn	236122	341652	440290	441740	371233	495302	683264	241446	311256	394563	254744	489776	467441	477016
O89020	Afm	644953	843898	1030000	570720	565783	867954	891690	914188	1190000	1140000	1210000	769363	777456	629135
Q3V384	Afg1l	628278	471243	587383	731665	621523	609873	565114	420295	361090	525095	759774	908163	600688	404450
Q8JZQ2	Afg3l2	1280000	1310000	1300000	1510000	1540000	1500000	1440000	1520000	1020000	1330000	1280000	2290000	1260000	1520000
Q3UHD9	Agap2	NA	835394	436680	NA	NA	436810	706595	NA	NA	NA	508645	1790000	1490000	NA
Q8VHH5	Agap3	409362	322223	168018	216201	456846	454929	588093	420994	366164	345359	170785	1070000	683415	273180
Q8K2K6	Agfg1	148203	178981	237735	182645	280350	183511	263539	301802	172623	192092	225780	723084	367922	217761
Q80WC7	Agfg2	NA	NA	NA	NA	29790.9	56650.9	NA	NA	NA	NA	65418	173432	102088	NA
Q9ESW4	Agk	880700	652721	887182	560563	728967	821076	1180000	414176	586298	417531	679690	3060000	1850000	452967
Q9CYR6	Pgm3	352229	510877	455454	462427	359213	443738	412706	496807	463741	522825	404226	502140	565599	508051
Q8CJG0	Ago2	679514	678202	769369	695373	664069	724624	618807	586834	741572	716039	578756	668980	823821	732190
Q3UHD1	Adgrb1	NA	NA	NA	NA	NA	40791.8	NA	NA	113163	NA	NA	520109	174488	NA
A2ASQ1	Agrn	565237	635704	625213	469745	525115	593561	760790	NA	417670	534618	459517	663853	642388	377218
Q80TR1	Adgrl1	NA	NA	NA	NA	NA	NA	NA	NA	NA	NA	NA	310205	238870	NA
Q80TS3	Adgrl3	NA	NA	38424.5	31848.9	49447.3	119224	NA	NA	NA	NA	NA	303355	139992	NA
Q8BK64	Ahsa1	1250000	1120000	1090000	1360000	1180000	1100000	1220000	1190000	726502	1030000	1190000	2220000	1230000	976695
Q9Z0X1	Aifm1	4560000	4060000	3300000	5310000	5210000	4090000	3500000	3120000	3590000	3110000	3380000	4840000	3750000	3640000
Q3TY86	Aifm3	NA	NA	NA	NA	NA	NA	NA	NA	NA	NA	NA	259449	164789	NA
P31230	Aimp1	1500000	1500000	1560000	1260000	1160000	1650000	1240000	1390000	1510000	1780000	1510000	1820000	2130000	1360000
Q8R010	Aimp2	2000000	1180000	1410000	1190000	1380000	1380000	1110000	1480000	1380000	1070000	1190000	889216	1130000	1300000
P46660	Ina	819303	827615	4330000	751840	3250000	5220000	11100000	649952	512315	1110000	2560000	27500000	14800000	2320000
A2AJA9	Ajm1	NA	NA	109948	NA	NA	44976.8	255422	NA	NA	NA	NA	433444	219188	NA
Q9JII6	Akr1a1	716461	491474	826332	399088	693819	735425	1380000	768266	682465	664289	560176	1020000	658977	896022
Q9WTQ5	Akap12	420864	501335	366439	405685	358211	422648	913176	461853	515450	446004	525081	540420	467380	620207
O08715	Akap1	266302	193753	131593	176887	214489	92694.9	93216.5	NA	113411	137605	109132	216802	133510	99869.1
O54931	Akap2	78585.9	NA	37315.5	77795.9	89553.5	118691	NA	52590.2	46378.8	59392.3	NA	90652.5	87920.3	NA
D3YVF0	Akap5	NA	NA	149117	NA	NA	NA	91059	NA	NA	NA	NA	467537	294513	NA
Q9DCT1	Akr1e2	693351	609208	733512	555875	680383	786000	779834	1020000	826351	636133	694487	675161	688565	629639
P31750	Akt1	192508	271871	345634	165938	345040	243762	NA	382264	141711	247151	222551	603640	159220	396604
Q60823	Akt2	379182	431941	434976	483041	346329	455482	583108	739362	695738	473702	547046	351976	248962	406605
Q9D1F4	Akt1s1	779689	1290000	916913	966005	1020000	1360000	1010000	1180000	1130000	1320000	593526	725680	791702	911462
P24549	Aldh1a1	3860000	2980000	3400000	3120000	2330000	2600000	3760000	2660000	1810000	2170000	3420000	2400000	2330000	2390000
Q8R0Y6	Aldh1l1	1010000	977561	1250000	836056	1110000	1520000	2490000	933911	898375	869245	1190000	4500000	2550000	827746
P47740	Aldh3a2	449751	1040000	1010000	973390	687917	581991	803978	648083	971685	851818	882004	1160000	927636	932081
Q8CHT0	Aldh4a1	1640000	1370000	1620000	1810000	1810000	1170000	1170000	1670000	1360000	1460000	1730000	1470000	1340000	1170000
Q9DBF1	Aldh7a1	1020000	745631	842690	876799	882607	858468	1030000	1080000	747776	724687	1060000	1850000	1330000	1050000
Q9JLJ2	Aldh9a1	153927	207142	224630	90094.7	114202	149214	288342	192525	368545	128003	282762	640699	285067	131793
Q8QZR5	Gpt	1260000	986870	1020000	1040000	1090000	873364	1020000	1020000	939984	971486	865262	995879	1070000	748351
Q8BGT5	Gpt2	899379	983932	1120000	888153	611605	708736	692213	1600000	1130000	1250000	1040000	1100000	824014	934947
P07724	Alb	129000000	223000000	249000000	181000000	144000000	163000000	211000000	269000000	253000000	238000000	222000000	146000000	165000000	159000000
P47738	Aldh2	5410000	4520000	4520000	5090000	4910000	3730000	5800000	4950000	5130000	3600000	6700000	7250000	5810000	3660000
P05064	Aldoa	538000000	522000000	441000000	393000000	356000000	368000000	412000000	665000000	436000000	454000000	467000000	320000000	325000000	390000000
P05063	Aldoc	532168	586123	2010000	274728	1360000	2190000	3500000	551827	832149	756780	964811	7510000	5060000	1400000
P45376	Akr1b1	20700000	15400000	15600000	11100000	13600000	15400000	11200000	22900000	15700000	13400000	14400000	11900000	13700000	13700000
Q9DBE8	Alg2	258995	325182	486864	298878	422120	373716	571022	344088	333852	418320	423865	1220000	570326	409487
Q8K1E6	Alkbh3	335121	316140	318798	375392	234506	436131	277685	308310	NA	160062	354793	217298	243587	268691
Q924C5	Alpk3	900811	1020000	796876	1030000	914386	861914	782112	699492	919523	1010000	837124	636695	811844	1050000
P56213	Gfer	NA	39192.6	NA	85122.2	101911	68639	NA	77726.2	NA	NA	51277.7	66695.3	NA	NA
O09174	Amacr	809652	451008	473634	342251	476761	539374	269365	523414	501075	420833	533210	651983	663984	468509
Q07456	Ambp	349149	315989	554476	423826	385252	524591	514857	241982	559982	404358	NA	NA	NA	343798
Q8CCJ4	Amer2	NA	NA	44952.8	NA	34433.4	142241	NA	NA	NA	156475	NA	365711	138294	NA
Q8VCT3	Rnpep	937126	984186	931477	871627	1070000	835029	744781	934318	912303	787113	997649	1300000	1130000	894056
Q3V1D3	Ampd1	27800000	30400000	26800000	27500000	24600000	29700000	19700000	37100000	31800000	35600000	33500000	18500000	24700000	35900000
Q9DBT5	Ampd2	NA	NA	NA	NA	357968	279808	720700	NA	NA	NA	NA	730119	421220	514482
P16406	Enpep	218043	218164	223325	130684	NA	235363	204313	243003	182867	271074	205606	175312	207988	NA
Q7TQF7	Amph	122091	138125	803080	92598.5	549430	859480	1320000	129958	264645	267144	464299	5050000	2160000	344134
Q9CPY7	Lap3	1710000	1780000	1860000	1730000	1980000	1830000	1570000	1540000	1470000	1740000	1590000	2930000	1960000	1640000
P97449	Anpep	328970	523372	474739	356112	390190	466117	349498	281924	427884	331509	313256	367775	562909	329344
P55302	Lrpap1	1300000	1520000	1920000	1860000	1420000	1180000	1200000	1470000	1850000	1510000	1980000	1730000	1520000	1200000
P00687	Amy1	33401.4	145831	142463	173375	137183	178026	59528.5	135059	158057	148152	155685	75576.3	125443	166442
O35381	Anp32a	1300000	1580000	1420000	929394	930336	1670000	1660000	1400000	1060000	1240000	1080000	2400000	1650000	1320000
Q9EST5	Anp32b	526800	786378	724595	540783	681968	811372	612279	704033	551146	541692	586285	269841	514398	378415
P97822	Anp32e	423510	464522	660599	410312	368855	343567	366413	526707	389089	472160	473310	584168	484149	480374
Q810B6	Ankfy1	NA	165992	140614	132911	163545	NA	311567	165470	114105	131735	163360	477458	308254	41958.5
Q8K1C0	Angel2	190959	125683	112569	55907.8	145464	284051	217971	116312	153475	194605	249157	268742	269492	120410
Q8R1Q3	Angptl7	NA	412934	NA	273917	67471.2	NA	NA	NA	131722	94937.8	NA	71538.1	132464	246617
Q02357	Ank1	5100000	5330000	4900000	5010000	4880000	4420000	4950000	5070000	5090000	5480000	5330000	7950000	5630000	4260000
Q8C8R3	Ank2	764334	595802	1100000	736993	1020000	1700000	1700000	682735	433521	577843	782453	4920000	2430000	910193
G5E8K5	Ank3	1070000	1110000	1230000	1020000	1100000	1090000	1190000	1080000	986932	1070000	950015	2630000	1750000	1040000
Q9WV06	Ankrd2	1570000	386536	715375	1120000	658228	514598	591576	922489	353373	598723	206303	1250000	1570000	818249
Q3TPE9	Ankmy2	NA	NA	NA	NA	NA	NA	NA	NA	NA	NA	NA	118400	91407.2	NA
Q9JIF0	Prmt1	1160000	804051	1210000	1060000	827129	1390000	1440000	1050000	1330000	1110000	942864	1490000	1520000	1520000
Q922H1	Prmt3	61038.5	110474	85987.4	143304	74261.8	102329	NA	35291.9	80990.7	137631	NA	87660.1	104648	NA
Q8CIG8	Prmt5	685626	674961	504422	656155	602539	668252	693534	838219	636635	732066	632018	928572	801984	821292
Q6PAK3	Prmt8	NA	NA	87587.3	NA	NA	NA	49272.8	NA	NA	NA	56476	227547	74056.2	NA
Q8BH79	Ano10	1230000	1880000	1660000	1450000	1440000	1430000	1450000	1860000	1990000	1700000	1480000	1310000	937882	1940000
Q505D1	Ankrd28	223867	121166	134509	94547.1	138428	NA	NA	209117	114609	142639	138154	274806	155299	115044
Q8BIZ1	Anks1b	NA	NA	261032	NA	235205	308469	474610	NA	NA	90438.8	158027	1540000	803324	94782.6
P32261	Serpinc1	1820000	2350000	2680000	1930000	1760000	1910000	2570000	1870000	2320000	1910000	2090000	1460000	1910000	1290000
P97384	Anxa11	3660000	3270000	2870000	2770000	2610000	2490000	3400000	4030000	3290000	3510000	3210000	2550000	3340000	3020000
P10107	Anxa1	480066	624997	634936	343843	251545	387709	875165	778147	561555	658215	526555	246082	359052	199349
P07356	Anxa2	4320000	4040000	4130000	3200000	3090000	4060000	8630000	5040000	4320000	4530000	4900000	2990000	4510000	3310000
O35639	Anxa3	602969	832751	703734	555766	546587	654526	994675	970886	574045	902847	779487	866302	900186	390950
P97429	Anxa4	1040000	1340000	1480000	1190000	940028	1310000	1420000	1650000	1360000	1170000	1550000	1120000	1550000	1140000
P48036	Anxa5	2660000	1850000	1920000	1580000	1540000	1860000	3940000	2480000	2390000	1310000	2310000	1910000	1770000	1720000
P14824	Anxa6	27800000	28900000	28400000	26800000	24500000	24400000	25000000	28500000	24300000	26600000	28300000	22900000	22000000	25300000
Q07076	Anxa7	3620000	2540000	3530000	2320000	2900000	3280000	3380000	5680000	2860000	3860000	2940000	3160000	3010000	3470000
O70423	Aoc3	1120000	808518	2250000	1200000	1520000	1910000	6870000	2920000	2510000	1430000	3220000	1520000	1430000	846869
Q64133	Maoa	1290000	1860000	1350000	1520000	1950000	1970000	1690000	1180000	1770000	1630000	1820000	3270000	2180000	1420000
Q8BW75	Maob	1790000	1770000	1590000	1490000	2190000	1760000	1620000	1230000	1530000	1300000	1650000	2230000	1430000	1530000
O54754	Aox1	158217	146346	168225	57222.8	214191	244718	164085	149036	110519	171133	283419	163784	184008	144255
Q61548	Snap91	826349	790193	1760000	563471	1650000	2340000	4300000	788623	601091	949219	1230000	11200000	5310000	1180000
O35643	Ap1b1	482929	575184	522103	444338	469145	555211	678368	447092	407591	501771	617068	1880000	1420000	530015
P22892	Ap1g1	389092	299535	333131	249096	332961	352755	670828	340299	357780	336168	404615	575525	638876	375738
P35585	Ap1m1	600760	570056	545927	487989	613002	466369	539914	485965	497394	354978	522387	1470000	984412	459443
P61967	Ap1s1	NA	NA	69077.3	NA	136537	81656.3	200042	NA	NA	82215.5	NA	540651	269746	NA
P17426	Ap2a1	835307	1030000	1790000	1030000	1580000	2170000	3070000	883312	849834	974861	1490000	8030000	4860000	1220000
P17427	Ap2a2	1080000	1320000	1850000	910223	1530000	2000000	2480000	1210000	1300000	1270000	1730000	7410000	4340000	1230000
Q9DBG3	Ap2b1	895232	820280	1360000	569352	1090000	1440000	2110000	608847	666565	785866	1000000	4710000	3040000	1090000
P84091	Ap2m1	1350000	1320000	2190000	1400000	1810000	3180000	3590000	1230000	1550000	1350000	1730000	11800000	7110000	2000000
P62743	Ap2s1	1060000	1040000	1000000	472124	980511	1760000	2270000	NA	1050000	784751	1560000	11100000	NA	1440000
Q9Z1T1	Ap3b1	105336	230559	277879	207460	210190	101918	178901	186685	196495	181016	312821	210027	162863	290880
Q9JME5	Ap3b2	NA	NA	78568.7	NA	164687	215412	319796	NA	NA	NA	636558	886863	519694	NA
O54774	Ap3d1	208388	256164	296709	214345	297352	264755	545397	163119	257999	200825	336967	904084	491509	185724
Q9JKC8	Ap3m1	178924	162381	172513	NA	201945	161330	NA	NA	NA	130444	146839	173832	166009	165077
Q8R2R9	Ap3m2	124322	NA	325096	NA	262037	441218	371662	251907	143130	NA	247049	1350000	666911	NA
Q8BSZ2	Ap3s2	NA	167059	327297	157715	NA	390392	425271	157486	114733	187062	NA	870550	310194	NA
P56380	Nudt2	493333	175447	330151	329980	365436	NA	426311	422969	243249	304797	258199	272320	296231	398526
B2RUJ5	Apba1	NA	NA	NA	NA	NA	18234.8	NA	NA	NA	NA	NA	134075	57088.9	NA
Q9QXJ1	Apbb1	NA	NA	NA	NA	NA	NA	NA	NA	NA	NA	NA	148270	77650.7	NA
P28352	Apex1	131025	139403	151600	40620.2	120157	153304	326157	81515.4	53760.9	119953	79672.5	333470	190262	183697
O35841	Api5	210403	51680.7	93328.2	91788.6	113161	48717.9	NA	130523	19528	12576	54210	350998	240453	NA
Q06335	Aplp2	80451.9	89396.5	143805	84536.7	103169	102060	146056	90709.4	336818	75780.6	79513.6	116117	181240	180688
Q9D7N9	Apmap	1100000	1080000	1090000	1200000	1260000	978915	959102	1130000	1290000	1130000	1440000	1410000	1280000	779974
Q00623	Apoa1	3040000	2620000	2980000	2000000	1810000	2540000	6250000	2930000	2530000	2860000	2590000	2400000	1820000	1850000
P06728	Apoa4	970010	1220000	877732	814742	882900	1050000	2340000	1810000	1350000	1120000	725187	735698	1180000	708994
P08226	Apoe	NA	100209	196307	88659.9	98069.1	137925	263973	144118	113625	160099	104800	259046	147929	NA
Q01339	Apoh	475074	595827	934882	635049	531737	656643	782917	572953	680129	980652	983986	498030	674701	649281
P08030	Aprt	924593	866625	1080000	902272	919262	1060000	1340000	1140000	1330000	1170000	1440000	1080000	1120000	1630000
Q02013	Aqp1	NA	341092	307456	582776	461717	NA	624663	NA	427688	521960	262269	365511	279373	NA
P55088	Aqp4	NA	NA	NA	NA	459373	NA	532121	NA	NA	NA	165134	1200000	679237	NA
Q9JKW0	Arl6ip1	76458.1	71101.5	135834	84261.2	92186.9	125242	201685	76453.4	91458.7	84864.9	133264	652173	264796	NA
P04627	Araf	NA	121180	65549.3	45422.1	NA	108019	NA	NA	NA	NA	60512	200647	84858.6	NA
Q99MK8	Grk2	267121	371182	525507	339599	436937	593355	493445	433821	207718	318680	365864	645103	704206	444811
Q9R0Q6	Arpc1a	1180000	1650000	1760000	1380000	1980000	1980000	2270000	1060000	1530000	1500000	1530000	5560000	3490000	1660000
Q9WV32	Arpc1b	237381	438116	206896	265264	175873	245085	417059	245171	254414	233414	195288	393469	275370	174013
P61205	Arf3	1370000	944399	1300000	890148	1490000	1420000	2350000	989105	841955	811136	1110000	2910000	2300000	1250000
P61750	Arf4	44913.4	NA	NA	NA	NA	26861	NA	NA	NA	NA	NA	34941.3	13213.7	161610
P84084	Arf5	240735	255344	215685	175640	380148	342275	159070	297910	NA	244147	347886	587004	288904	319061
Q9EPJ9	Arfgap1	221013	283107	303165	357434	289506	447708	492978	273448	169844	180274	379260	555245	888810	NA
Q99K28	Arfgap2	598702	548510	438584	363967	581684	335056	271251	381933	263371	436690	404211	644445	460097	259753
A2AWP8	Arhgef10l	2650000	287895	213312	821950	483884	260683	254622	NA	348738	400921	145588	645448	487271	373939
Q61210	Arhgef1	76618	407883	463313	218444	174360	392561	373216	NA	416629	262303	365832	297631	187711	230518
Q60875	Arhgef2	105007	135078	190701	92076.5	225661	316614	280698	34826.7	44163.8	37354.6	156902	904443	492481	138220
Q9ES28	Arhgef7	132143	126120	162515	176616	146543	150527	217163	166943	136352	159519	184485	417998	352596	118206
Q3UTH8	Arhgef9	NA	NA	NA	NA	NA	48765.2	185350	NA	NA	NA	NA	279713	219526	NA
Q8R4H2	Arhgef12	NA	79798.5	120562	NA	175181	192577	NA	NA	NA	NA	NA	190013	166604	NA
Q8BGK2	Adprhl1	713896	463403	529735	666307	776085	508657	143915	481917	387961	421012	338343	681844	909642	481455
Q9Z1K5	Arih1	552457	495834	550050	447841	640871	694029	560030	598242	490707	693518	620712	733487	488923	519917
Q9Z1K6	Arih2	549514	591382	678262	702026	559742	768612	605793	714992	629467	650585	703392	539914	694047	789235
Q8CG76	Akr7a2	1900000	1270000	1560000	1520000	1470000	1290000	1250000	1910000	1400000	1130000	1250000	1470000	1120000	1690000
P61211	Arl1	497372	590884	772218	415224	769891	462007	472754	267962	423856	1770000	417204	968339	NA	429404
Q9WUL7	Arl3	NA	298657	421966	294963	286521	418227	543244	425075	312972	354810	496060	408869	199380	378393
Q8VEH3	Arl8a	NA	NA	278868	NA	190328	255336	NA	NA	NA	NA	NA	332374	431493	NA
Q9CQW2	Arl8b	1200000	947173	813511	720814	1610000	895890	560391	696421	1090000	808147	660506	1850000	1080000	636796
Q91YI0	Asl	522928	572453	320806	375203	352780	471330	549775	550414	858958	445879	221135	373271	476417	525051
Q9D0L7	Armc10	187068	163188	173385	NA	113907	195960	300463	122134	NA	NA	NA	451774	277811	189597
Q9D7A8	Armc1	214537	145293	288143	210260	266691	262333	240503	168792	387214	233567	186259	140472	275725	275543
Q8BNU0	Armc6	NA	197347	166419	87933.4	164516	91637.9	216868	51241	108016	58378	NA	336338	123760	176522
A6H630	Armt1	598338	490974	388573	382938	NA	320678	309085	515187	372206	363692	552377	512759	614316	451781
Q9QZB7	Actr10	195758	180908	227534	141210	185713	281261	246740	253765	161682	182092	188128	225434	316459	206692
P61161	Actr2	833068	824637	1360000	758781	784968	1140000	944335	853364	663490	791900	813737	2880000	1490000	945476
Q99JY9	Actr3	1150000	1240000	1470000	1140000	1290000	1320000	1830000	1160000	1140000	1200000	1410000	3540000	2340000	1100000
Q641P0	Actr3b	202954	136757	214615	155811	247481	262398	342166	194217	175718	149564	270594	885057	381169	233262
Q9D898	Arpc5l	974730	564025	2930000	455756	1810000	1720000	3720000	989462	640112	1240000	644105	1660000	282903	2770000
Q9CVB6	Arpc2	1040000	1150000	1020000	649882	1210000	1360000	1690000	748589	964559	881024	1210000	4570000	2410000	1040000
Q9JM76	Arpc3	740024	661777	1780000	201556	1060000	996778	1920000	622437	1030000	663614	516157	1180000	1040000	1430000
P59999	Arpc4	2740000	997486	3840000	1390000	2180000	2620000	6300000	1730000	1740000	1660000	773139	1780000	2010000	4040000
Q9CPW4	Arpc5	377967	475285	516337	NA	314069	438261	1030000	367390	NA	421471	403374	808731	273649	580908
Q8BWG8	Arrb1	366793	291560	287969	216179	275129	325143	273387	281837	285693	606649	235475	928598	515267	NA
P50428	Arsa	NA	NA	NA	NA	NA	17374.5	NA	NA	NA	NA	NA	64421.1	42486.9	NA
P50429	Arsb	NA	112278	NA	NA	NA	76854.7	NA	NA	NA	NA	NA	476358	227098	NA
P98203	Arvcf	NA	15925.1	51490.3	22277	25408.9	65064.4	NA	49374.2	42253.4	NA	NA	197178	101725	NA
Q91WU5	As3mt	608932	797776	441704	691306	596728	449479	529236	502045	492258	482105	510069	480175	403987	503603
Q9WV54	Asah1	399214	1400000	1390000	1180000	1080000	1290000	957157	1210000	1350000	1310000	1910000	2010000	1320000	612008
Q9QWY8	Asap1	NA	12392.5	52538.1	NA	NA	46130.7	172037	NA	NA	NA	NA	228524	125166	NA
Q91ZT7	Asb10	126993	65725.1	124627	65954	86780	137080	NA	58205	64042.6	61141.3	85481.6	96966.7	137766	NA
Q8K0L0	Asb2	927049	872778	852745	685690	833547	912229	533688	824231	726000	865004	783844	669646	776005	846847
Q8C0M9	Asrgl1	1460000	985311	1660000	1060000	1460000	1360000	2190000	1170000	1200000	965543	1040000	1710000	1290000	1930000
Q04519	Smpd1	NA	NA	92819.6	183867	93472.7	142784	194776	NA	NA	52594.1	133904	405736	157179	105722
P70158	Smpdl3a	NA	NA	NA	53383.3	81173.9	130608	111655	82017.3	NA	82094.5	59021.7	29643.3	43387.4	106233
Q8VBT9	Aspscr1	212674	166083	226750	122409	158801	207914	NA	320022	156104	242568	178656	311731	247271	251045
Q8BSY0	Asph	4090000	7360000	6080000	6560000	6800000	8360000	7850000	1050000	6640000	8030000	6940000	4620000	7610000	10800000
Q99MQ4	Aspn	4000000	8190000	6100000	3380000	2160000	4130000	7040000	5270000	3350000	4260000	3430000	2160000	3040000	2030000
P16460	Ass1	100936	142491	130824	64194.4	NA	57018	269904	NA	NA	90817.4	117381	336929	249088	NA
Q61137	Astn1	NA	NA	NA	126541	224108	380148	246851	481248	NA	NA	NA	1230000	394959	341266
Q9EPE9	Atp13a1	408644	627925	624755	502553	526644	575893	668494	508914	640453	391888	560406	533941	570881	728014
Q8VDN2	Atp1a1	1990000	2420000	3900000	2260000	3790000	5990000	6280000	2420000	2540000	2380000	3300000	24200000	13100000	3870000
Q6PIE5	Atp1a2	24300000	25700000	32600000	24500000	34700000	35900000	40400000	23600000	27700000	25200000	26300000	75800000	58900000	32600000
Q6PIC6	Atp1a3	890225	1310000	4530000	1100000	4180000	5340000	6220000	915911	576679	1150000	3670000	33000000	11200000	2060000
P14094	Atp1b1	13400000	10200000	19600000	13000000	19800000	25100000	39700000	7860000	8610000	10700000	13600000	100000000	74200000	15300000
P14231	Atp1b2	1440000	1650000	2100000	1500000	1780000	2300000	2010000	2080000	1950000	1800000	2480000	5830000	3170000	1950000
P97370	Atp1b3	1640000	1090000	1710000	1640000	2340000	5860000	4400000	3540000	1760000	1900000	1520000	4900000	1510000	2530000
Q8R429	Atp2a1	584000000	914000000	707000000	763000000	767000000	694000000	682000000	719000000	802000000	768000000	792000000	524000000	619000000	829000000
O55143	Atp2a2	3120000	1970000	4370000	2740000	2460000	2640000	3020000	3220000	1620000	1830000	1570000	5730000	6680000	2970000
Q64518	Atp2a3	85200000	94000000	87600000	98300000	95200000	90100000	74800000	89300000	118000000	99500000	80300000	64300000	60800000	97500000
G5E829	Atp2b1	959556	1310000	2130000	1130000	1970000	2560000	3890000	1210000	1260000	1420000	1680000	10400000	5450000	1770000
Q9R0K7	Atp2b2	219934	178767	573014	364089	647817	584441	744981	248625	125356	367313	368786	4000000	1930000	428540
Q6Q477	Atp2b4	148175	234610	214513	144219	244462	395147	254207	154601	210179	230476	220583	1000000	518288	193303
Q8R1K4	Phykpl	397492	118536	307748	336551	303292	273404	486227	182876	263843	384790	319238	179150	349088	271171
Q9CQQ7	Atp5pb	29900000	19400000	20900000	23600000	29400000	23300000	18000000	19700000	15500000	17900000	18100000	27600000	24900000	19300000
P70704	Atp8a1	364165	317048	336514	273160	353674	491602	390540	191110	439483	371919	390571	987112	706545	325352
Q9D5T0	Atad1	1050000	540626	455625	528436	635476	577086	562536	562928	372998	379116	431586	906763	776325	537809
Q925I1	Atad3	860414	679783	580899	997642	791674	782771	737652	580321	644922	668850	806091	1050000	963217	742376
Q8BHE3	Atcay	NA	NA	NA	NA	NA	NA	NA	NA	NA	NA	NA	167894	107151	NA
Q9Z2A5	Ate1	449756	429304	405346	282446	408206	349939	516075	600010	389637	381166	490378	389169	230064	651027
Q9CPX6	Atg3	64755.5	51060.6	109176	91862.3	NA	225110	156204	56864.7	253416	176989	141253	307125	178294	31321.3
Q8C9S8	Atg4a	82325.9	61540.3	37254	112728	83619.6	64921.1	87959.5	183370	80540.7	11807.2	94451.4	71946.1	50213.7	144022
Q9D906	Atg7	1200000	2190000	1670000	1540000	1850000	1840000	2040000	2640000	1540000	2110000	1980000	3120000	3730000	1830000
Q68FE2	Atg9a	222765	142815	147054	123220	126879	158138	107094	88536.1	121275	127411	59297.1	177575	188767	193120
Q8BH66	Atl1	NA	204089	270808	355199	250705	364641	520382	NA	575665	NA	283909	1290000	733767	220666
Q6PA06	Atl2	6430000	6190000	6680000	7880000	7740000	6090000	6300000	5420000	6310000	7190000	8450000	5480000	4810000	8380000
Q91YH5	Atl3	236967	223923	89170.1	153520	157591	179073	310050	237209	283282	158991	NA	NA	102351	117984
O08997	Atox1	343020	416879	582147	328269	507273	720462	989089	418494	373368	374239	466907	476963	574328	450058
Q9DCX2	Atp5pd	4180000	2990000	3960000	3150000	3420000	3230000	3990000	3500000	3090000	2940000	2250000	3950000	2710000	3360000
Q06185	Atp5me	10400000	7620000	9450000	6580000	12200000	11600000	13900000	10100000	7930000	9700000	4780000	8520000	7930000	12600000
P97450	Atp5pf	2440000	1530000	2500000	1870000	2020000	1980000	3940000	1610000	1410000	2080000	1370000	2030000	1720000	2930000
Q9CPQ8	Atp5mg	21000000	9610000	15000000	11700000	12700000	15500000	14900000	12400000	12200000	11600000	9220000	14400000	9270000	14000000
P03930	Mtatp8	16700000	10100000	14300000	11300000	16900000	4750000	8500000	10400000	12700000	12000000	9540000	12500000	14500000	9810000
O70228	Atp9a	78483.3	123092	240347	121042	198527	183463	354699	84554.8	100094	82413.5	NA	641131	267580	118433
Q03265	Atp5f1a	150000000	110000000	107000000	110000000	102000000	99300000	108000000	122000000	90800000	96900000	89800000	132000000	109000000	85900000
P56480	Atp5f1b	211000000	120000000	121000000	147000000	150000000	127000000	126000000	138000000	109000000	111000000	105000000	140000000	140000000	110000000
Q9D3D9	Atp5f1d	151712	NA	110665	NA	269560	96203.7	NA	NA	NA	97124.1	74038.4	80086	NA	357010
Q811I0	Atpaf1	366078	436719	471622	420694	616846	536329	470533	508302	484357	423253	450593	820746	327761	465562
Q91VR2	Atp5f1c	27700000	17000000	17200000	19000000	22500000	19000000	20600000	13300000	13600000	14800000	12100000	24100000	21800000	16700000
P56135	Atp5mf	46900000	30500000	39000000	38100000	39300000	25900000	24900000	29300000	31200000	28200000	27200000	45400000	38600000	22300000
Q78IK2	Atp5mk	4220000	1890000	2750000	2070000	2430000	3330000	3420000	2610000	1610000	2040000	2010000	2750000	2840000	3060000
Q9DB20	Atp5po	20700000	10200000	13200000	12000000	13800000	12800000	19200000	12500000	8480000	10000000	6640000	10800000	11200000	17000000
O70305	Atxn2	363432	362557	340275	282411	333365	386422	331084	370885	434710	344430	267237	390239	296943	379978
Q7TQH0	Atxn2l	90379.7	51420.1	76419.7	68887.1	74813.7	NA	NA	69576.3	NA	96906.4	115346	78798.2	60086.5	33555.6
Q9JLZ3	Auh	2400000	1010000	1650000	1430000	1030000	1730000	1800000	1190000	1300000	966090	1550000	2200000	2200000	1220000
P70295	Aup1	553363	1000000	512001	912908	738755	749628	500192	708620	509363	922050	717373	502889	436701	890833
Q80TZ3	Dnajc6	NA	3670000	991602	2530000	683529	1010000	1280000	NA	NA	484410	439817	2820000	1440000	515040
Q9D9K3	Aven	170912	294516	201361	269465	156095	NA	NA	261343	191216	245219	229568	196447	140921	144868
B1AR69	Myh13	1060000000	1270000000	1200000000	1050000000	1240000000	1230000000	1060000000	1370000000	1520000000	1180000000	1240000000	846000000	1060000000	1770000000
B1AUN2	Eif2b3	494127	562270	580933	642721	625754	722342	427485	479655	559106	460856	477424	817630	866337	418352
B1AV09	Luzp4	NA	181458	165854	184940	63989.7	NA	NA	95672.9	NA	NA	163288	166360	129345	NA
P59017	Bcl2l13	1450000	1080000	1030000	989737	963144	1210000	928357	913686	905741	619760	726905	900446	1210000	840660
B2RXT3	Ogdhl	190550	106201	324446	313153	344027	433163	500456	245455	NA	248793	384319	1300000	1080000	338252
P04919	Slc4a1	1820000	970546	886842	1080000	1390000	1100000	1240000	957199	1560000	1690000	1730000	1830000	1640000	1680000
Q8BG28	B3galnt2	91995.3	NA	NA	78763.7	33296.7	NA	NA	94928.5	NA	NA	NA	NA	NA	NA
B8JJ69	2310061I04Rik	658267	428575	515269	244913	649863	406939	427970	289421	338374	294026	332444	624262	459245	491061
B9EJ54	Nup205	NA	NA	NA	NA	338622	393712	528999	NA	NA	NA	579474	539460	NA	378880
Q8K3W0	Babam2	218181	282167	119896	156241	128379	149604	101234	198141	182863	151398	60723.8	409932	192437	222998
Q91V12	Acot7	887961	987933	2870000	764440	1630000	3460000	5060000	745951	627306	938396	1810000	16800000	6090000	1680000
O54962	Banf1	913696	791164	1140000	609134	1010000	616997	868824	807344	932365	935310	796519	847263	835254	1020000
Q9JLV1	Bag3	2230000	1730000	1780000	2080000	1460000	1430000	1850000	1530000	1340000	1530000	1370000	1550000	1560000	1410000
Q8CI32	Bag5	137735	181462	132719	108306	145035	NA	145908	NA	NA	243307	237994	421245	219035	NA
Q9Z1R2	Bag6	344656	324451	382752	242043	354380	333560	633169	294659	303115	449525	340711	657000	491197	391637
Q8BKX1	Baiap2	171588	133187	478488	96026.1	344688	699937	1060000	109351	201568	270192	298842	2900000	912970	211575
Q61334	Bcap29	NA	143776	149152	105603	153207	198304	92518.8	121456	NA	147369	121807	164317	143479	138269
Q61335	Bcap31	371067	525582	619715	402757	366034	555703	318483	629494	550139	375117	593069	455464	621797	455394
P18572	Bsg	4960000	4300000	5240000	5820000	5120000	3560000	4490000	5050000	6320000	6690000	5230000	4970000	5510000	6200000
Q91XV3	Basp1	316028	416291	1550000	309169	1230000	2310000	3460000	485363	688781	642610	969090	11300000	5970000	1010000
Q07813	Bax	223151	269811	295120	276559	302913	395970	264677	198607	691871	409729	69267.9	450557	NA	210294
Q9R069	Bcam	807939	734121	718368	737385	844297	803976	723211	683316	830854	713049	653953	661836	876547	831073
Q80YN3	Bcas1	NA	556062	540351	452301	267542	494250	969078	356848	700738	420692	315951	385868	888180	394559
Q8CCN5	Bcas3	NA	NA	320404	268788	180303	229134	345582	NA	NA	NA	147737	725974	297109	NA
P24288	Bcat1	NA	NA	277679	NA	161239	214589	202835	284620	NA	98156.4	NA	647166	306290	163067
O35855	Bcat2	852191	388201	608895	621937	610910	391833	412638	510483	357775	385763	510107	462196	448375	355169
Q9CWI3	Bccip	76526.1	NA	146868	107630	130054	NA	NA	126060	211562	215230	173042	110551	84628.8	213498
O55028	Bckdk	325460	107511	273099	190552	158320	110253	NA	222988	259687	177587	231137	259432	346968	236328
Q8K019	Bclaf1	110090	52683.2	60613.7	70815.7	44993.6	NA	NA	93130.6	100957	80280.5	68007.3	89386.6	90029	NA
Q9CZP5	Bcs1l	288943	127196	170535	208470	236855	186842	124612	206413	141027	108651	95194.1	298879	310582	183449
Q80XN0	Bdh1	10800000	3080000	5710000	10800000	10000000	4920000	4120000	2760000	2080000	3040000	1610000	9100000	9660000	7040000
P23780	Glb1	110572	110523	149322	42728.6	90191.7	68507.5	50492.4	165280	204269	57515.9	234389	416587	193308	77917.3
P82198	Tgfbi	1420000	2070000	1250000	1180000	1080000	924332	1240000	1030000	1310000	899195	1130000	1110000	988243	995793
Q9D2C7	Tmbim6	195163	498842	369622	639410	294305	221949	297830	579189	253086	282272	NA	125097	242144	352172
Q9CY64	Blvra	1750000	1930000	1610000	1660000	1120000	1730000	1480000	1650000	1690000	1830000	1900000	1980000	1600000	1550000
G3X9K3	Arfgef1	152826	130940	95276.8	NA	74659	191757	NA	NA	NA	120039	353904	369070	170140	NA
A2A5R2	Arfgef2	183606	40157.5	98027.4	141843	165077	180765	158547	125872	107372	NA	47024.9	409473	281824	105823
Q3UGY8	Arfgef3	NA	NA	NA	NA	NA	24418	NA	NA	NA	NA	NA	261344	111008	NA
O08539	Bin1	12600000	16000000	12100000	11200000	11800000	12400000	8610000	14800000	12200000	14000000	11600000	11500000	9430000	12300000
P20029	Hspa5	7030000	11800000	8850000	9350000	8000000	8420000	8510000	8260000	9130000	9310000	8970000	10400000	8160000	8480000
O88738	Birc6	203311	198973	151693	171796	165251	161734	239362	186439	167687	173653	128357	440512	178885	263988
Q8R016	Blmh	1730000	1750000	1700000	1680000	1590000	1720000	1170000	1820000	1550000	2000000	1740000	2760000	2500000	2260000
Q923D2	Blvrb	710608	647152	710357	508195	620578	708514	862113	683578	753758	752680	656037	893076	871468	459940
Q9D8S9	Bola1	765909	805160	936523	659497	750680	1140000	996255	708180	824080	589630	642855	803426	752522	891640
Q8BGS2	Bola2	119035	310510	96673.9	128564	21811.9	249933	265961	137866	114481	176224	NA	62346.7	66659	177433
Q9JM96	Cdc42ep4	NA	NA	NA	NA	NA	NA	NA	NA	NA	NA	NA	998401	NA	NA
Q8R164	Bphl	1590000	706642	1140000	947522	999545	794480	1280000	895355	810460	852120	1030000	1460000	1390000	797327
Q920N2	Hlcs	288294	291753	278373	330409	303549	NA	266294	230140	299736	236123	253199	310206	185012	251509
Q9Z0S1	Bpnt1	672807	696595	704754	618542	751713	658062	590883	686904	558958	719181	699101	1810000	1090000	629765
P28028	Braf	NA	NA	NA	NA	NA	46501.9	NA	NA	NA	NA	NA	204481	88961.2	NA
Q8C3R1	Brat1	NA	308403	NA	NA	69075.1	111407	NA	141986	78562	NA	175541	154567	174992	98865
Q6DFY8	Brinp2	NA	NA	20003	NA	NA	NA	NA	NA	NA	NA	NA	91147.8	78685.6	NA
Q499E0	Brinp3	1680000	NA	412065	NA	1180000	1750000	NA	703364	NA	NA	NA	1940000	950465	1240000
Q8K2Q7	Brox	234030	139676	180521	88507.1	243739	142806	NA	136545	60071.8	117157	103767	229581	182143	211660
Q69Z98	Brsk2	NA	NA	106662	NA	98656.1	109592	NA	NA	NA	NA	101689	444442	224355	NA
O88737	Bsn	NA	NA	527564	209090	331442	552812	1030000	473141	699895	352908	374372	2280000	1430000	316484
D3YUB6	Btbd8	NA	NA	NA	NA	NA	331680	273502	NA	NA	NA	NA	721649	436255	NA
Q9DB72	Btbd17	190803	285080	211975	NA	126052	320338	450830	NA	172670	NA	132152	725257	373140	NA
Q8CIF4	Btd	NA	166631	188459	352114	NA	218325	NA	240645	NA	NA	NA	NA	194010	NA
Q64152	Btf3	946274	863052	868138	708735	715097	649965	435702	1050000	571964	763420	884448	815729	621774	772501
Q9WVA3	Bub3	40108.4	75933.5	68536.1	NA	37431.6	77625.6	79928.1	NA	74028.9	79238.6	106948	165819	119053	NA
Q2VLH6	Cd163	NA	348021	432622	259662	224323	NA	710864	283605	595161	422511	371934	497384	NA	201992
Q80U49	Cep170b	NA	NA	NA	NA	NA	NA	108627	NA	NA	NA	NA	356181	299652	NA
P98086	C1qa	NA	76236.6	90307.2	68207.4	NA	81703.6	170051	NA	NA	95259.7	NA	228626	100261	57948.3
O35658	C1qbp	1910000	1380000	1360000	2730000	1740000	1710000	1810000	1210000	1080000	1850000	541058	2320000	2110000	1100000
Q922D8	Mthfd1	2810000	2490000	2460000	2480000	2040000	2480000	1850000	2780000	2380000	2540000	2090000	3000000	2800000	2420000
Q3V3R1	Mthfd1l	NA	NA	30406.7	NA	NA	NA	NA	NA	NA	NA	NA	76628.8	55335.1	NA
Q80X80	C2cd2l	58722	86606.3	196626	NA	203101	223814	84675.9	NA	156378	182283	80858.8	523715	420429	186088
E9Q3C1	C2cd2	604679	585193	397681	512832	502426	665263	238278	595177	449245	615872	454420	457585	389474	248514
Q8K1A6	Cc2d1a	200832	266383	166271	159438	270125	262587	NA	214753	160692	287743	228619	348062	340123	192455
Q8BRN9	Cc2d1b	123808	143886	39851	64751.6	73359.7	200150	NA	68088.7	88349	85280.3	76385.9	53432.4	119073	93407.2
Q9CZB0	Sdhc	3610000	2490000	2640000	2830000	4650000	2430000	2510000	2500000	2580000	1820000	1960000	3090000	2650000	2400000
O08532	Cacna2d1	8090000	10800000	9480000	10500000	9790000	9810000	6920000	8740000	9060000	10800000	10300000	8900000	7770000	9740000
Q9Z1L5	Cacna2d3	NA	NA	NA	NA	125254	154074	145284	NA	NA	NA	NA	314059	175889	NA
Q06138	Cab39	1930000	516930	824891	585099	875048	736451	1070000	1150000	722429	767509	666530	682314	1180000	1250000
Q61290	Cacna1e	NA	NA	NA	NA	NA	NA	NA	NA	NA	NA	NA	241252	184060	NA
Q02789	Cacna1s	8210000	9990000	8210000	9150000	9890000	8510000	7800000	9300000	9800000	9020000	9550000	7300000	7480000	9980000
Q8R3Z5	Cacnb1	4610000	5190000	4590000	4620000	4170000	4070000	3320000	5560000	4570000	5190000	5710000	3210000	3730000	3930000
P54285	Cacnb3	5180000	5110000	3870000	3010000	3430000	4390000	4360000	4730000	6420000	5780000	5220000	5700000	4600000	3080000
Q8R0S4	Cacnb4	NA	NA	102626	NA	NA	NA	NA	NA	NA	NA	NA	310567	168904	NA
Q8CGU1	Calcoco1	281412	158997	424825	318478	200298	NA	415016	231066	289510	NA	248276	1180000	647199	NA
P47934	Crat	18000000	8940000	9010000	13100000	12200000	9710000	8660000	11300000	8830000	9430000	9500000	11100000	8720000	9490000
P70408	Cdh10	NA	NA	NA	NA	NA	NA	NA	NA	NA	NA	NA	575156	196390	NA
Q9WTR5	Cdh13	3040000	2760000	3780000	3360000	3000000	2770000	2980000	2460000	3840000	3040000	3270000	2450000	2740000	2660000
P15116	Cdh2	38379.7	233135	197112	86861.9	156578	202911	213196	211914	NA	154562	NA	552152	315801	187941
Q8R5M8	Cadm1	56942	NA	653490	NA	314505	483206	473921	NA	NA	NA	226761	1610000	827582	NA
Q8BLQ9	Cadm2	290375	174519	758302	367898	690277	1020000	915818	144405	NA	223588	448253	4730000	2580000	639367
Q99N28	Cadm3	364008	311521	1230000	527245	978888	1290000	1970000	636153	490398	418016	581487	6860000	3690000	663939
Q8R464	Cadm4	519455	300138	588683	570129	620067	904801	1320000	596950	485722	436053	630191	3410000	2160000	505385
Q8CAK1	Iba57	415942	292526	423039	354213	347840	370399	413974	358492	367619	353490	406499	430978	480358	299094
P13634	Ca1	870514	901787	516644	341894	464344	481434	1170000	469416	781321	755848	540313	802697	644884	396891
P61215	Ca10	NA	NA	NA	NA	NA	NA	NA	NA	NA	NA	NA	14375.1	NA	NA
Q9WVT6	Ca14	397583	261021	279816	363334	325952	445305	861330	346676	272075	579074	455623	671201	540109	220741
P00920	Ca2	2760000	1590000	2850000	1230000	1680000	2850000	5760000	1910000	2480000	2650000	2780000	10300000	5740000	2320000
P16015	Ca3	71400000	17600000	55500000	19300000	51900000	52500000	47000000	84500000	68600000	64800000	58400000	36700000	56000000	45800000
Q64444	Ca4	149969	145088	104705	145309	184400	81940.4	146051	NA	133469	NA	237132	634438	246233	99270.3
P12658	Calb1	667318	583085	2000000	204823	1240000	1890000	3000000	486216	961015	853187	214476	1650000	1360000	3250000
P0DP26;P0DP27;P0DP28	Calm1;Calm2;Calm3	5840000	4760000	12600000	3770000	8640000	9990000	18900000	6780000	6930000	8780000	4510000	9610000	7100000	14700000
P14211	Calr	2240000	2690000	2420000	2280000	2300000	2420000	1990000	2300000	2530000	2250000	2550000	3480000	2180000	1910000
O35887	Calu	320029	496621	795142	817432	534485	628763	730844	524260	585481	483938	633957	607556	628403	430858
P35564	Canx	2070000	2160000	1950000	2020000	2460000	2160000	2720000	1520000	1510000	1410000	2130000	4400000	3100000	2280000
Q3UHL1	Camkv	101561	161220	656685	53193.5	458313	675215	791556	82315.5	NA	215194	285698	2220000	1360000	275657
Q80VC9	Camsap3	834614	1750000	559703	243974	1770000	539371	NA	1870000	155179	588308	680882	262144	833698	776932
O35350	Capn1	2990000	3040000	2550000	2560000	2880000	3040000	1960000	2960000	2780000	2850000	2420000	1940000	2080000	3180000
O08529	Capn2	2030000	2130000	2270000	2370000	2640000	2320000	1970000	2390000	2330000	1910000	2230000	2880000	2290000	2090000
Q64691	Capn3	1170000	1130000	1150000	1150000	1350000	977051	816196	1200000	1140000	1240000	1210000	967045	1030000	1140000
O08688	Capn5	NA	50303.4	NA	NA	NA	150889	NA	NA	94608.8	NA	107303	497083	280849	NA
Q63810	Ppp3r1	411950	240799	1290000	282496	911161	1130000	1290000	461676	612260	490440	222813	659520	380573	1170000
Q6ZQ38	Cand1	1530000	1390000	2390000	1530000	2130000	2480000	3130000	1760000	1780000	1310000	2070000	6380000	3540000	1950000
Q6ZQ73	Cand2	6000000	6850000	5520000	6130000	6070000	5190000	3630000	6440000	6700000	6260000	6560000	4020000	5430000	7000000
P40124	Cap1	730147	980177	867561	684669	754172	1170000	1530000	683399	707670	694245	807620	3750000	1400000	658341
Q9CYT6	Cap2	2170000	2620000	2220000	2270000	2340000	2470000	2030000	2010000	2080000	2110000	1940000	3590000	3110000	2210000
P24452	Capg	951772	1730000	1340000	1010000	980457	817203	928760	1160000	1550000	1600000	1470000	1110000	1020000	962521
Q60865	Caprin1	307195	493789	208474	513748	260171	298981	258201	NA	116955	NA	812930	782600	602308	430187
Q80TJ1	Cadps	93041.6	202162	848375	38804.8	749200	1220000	1570000	159802	NA	382104	811471	4460000	2250000	736767
P47757	Capzb	6860000	8250000	7410000	7170000	7020000	7780000	6120000	9830000	8540000	7860000	9010000	7230000	7400000	7530000
Q9WVG6	Carm1	450304	437578	406473	350660	291197	430441	403228	407274	332329	535315	534798	689040	510803	410795
Q80UY1	Carnmt1	4730000	1870000	3500000	2340000	3240000	4030000	1830000	3680000	2490000	2160000	2620000	2270000	2040000	2590000
O09165	Casq1	142000000	196000000	176000000	198000000	175000000	155000000	101000000	205000000	209000000	183000000	240000000	124000000	121000000	141000000
O09161	Casq2	5970000	1990000	2930000	3880000	5490000	2180000	2300000	3070000	2750000	2400000	2750000	4080000	5300000	2850000
P24270	Cat	1170000	708135	564543	890036	936378	839561	1160000	1110000	1110000	879455	1130000	1200000	1040000	774109
P10605	Ctsb	2440000	2610000	2970000	2240000	3030000	2610000	2250000	2690000	3560000	2410000	3220000	3870000	3690000	2080000
P97821	Ctsc	200477	259145	436196	137512	208099	266411	531711	223301	255580	197795	210920	228896	222785	248424
P18242	Ctsd	7940000	9250000	7450000	7970000	9350000	7900000	6200000	8010000	7870000	7400000	7330000	8360000	5210000	6810000
P49935	Ctsh	121872	243615	217162	134970	NA	NA	607888	177918	209368	155559	191555	NA	148622	182092
P06797	Ctsl	NA	137347	95277.4	111809	106808	85234.6	NA	145878	115466	143953	203446	78894	NA	NA
P49817	Cav1	3870000	2490000	4500000	2840000	3510000	3610000	5720000	3770000	4840000	4000000	2580000	3410000	3910000	2060000
Q9WVC3	Cav2	219813	NA	NA	179408	456688	NA	NA	770093	NA	NA	354177	331533	154365	NA
O54724	Cavin1	8570000	7090000	7180000	5770000	8010000	7360000	10800000	7850000	8150000	6700000	6160000	6930000	6130000	6890000
Q63918	Cavin2	4400000	3540000	2650000	3220000	3230000	2640000	4550000	3520000	3380000	3320000	1390000	2940000	2430000	3020000
Q91VJ2	Cavin3	261021	232274	235645	126524	149718	303533	808718	369470	200554	266097	267080	328461	230186	168947
A2AMM0	Cavin4	3510000	4300000	5790000	4660000	5100000	4720000	5080000	4060000	5200000	4890000	4310000	2750000	4420000	4130000
P47753	Capza1	1450000	2010000	1020000	1520000	1680000	1700000	1780000	1320000	1160000	1100000	1360000	2340000	1100000	1720000
P47754	Capza2	26800000	27200000	26100000	30100000	28900000	37900000	24600000	27000000	28000000	29700000	35000000	25800000	23000000	35500000
Q06770	Serpina6	286178	68983.2	159867	142118	115415	88036	NA	NA	142523	167597	132378	202572	120726	NA
P15089	Cpa3	1660000	1450000	3120000	1680000	2030000	1590000	3380000	2840000	5010000	1810000	2030000	1770000	2400000	1870000
Q641K1	Agtpbp1	NA	108319	NA	NA	72725.8	78205.5	NA	23978.6	NA	78347.4	NA	63622	NA	NA
Q09M05	Agbl1	106515	50069.3	217557	94075.7	58281.2	53599.6	177541	NA	86882.7	62069.7	NA	NA	118914	59664.4
Q00493	Cpe	143367	229062	273986	174993	180443	302176	566373	200591	251931	215688	235426	230634	365404	128084
P48758	Cbr1	2160000	1780000	2450000	1700000	1940000	2200000	3130000	2110000	1890000	2170000	1670000	2500000	2300000	2490000
P08074	Cbr2	486990	411734	652862	218062	244438	369384	733970	703523	536309	454140	381627	285097	407783	413529
Q8K354	Cbr3	224740	239338	491316	107259	556432	360754	497828	264280	192254	208676	172654	437348	311218	372372
Q91VT4	Cbr4	1920000	1230000	1450000	1500000	2010000	1280000	1350000	1210000	1340000	1250000	1040000	1260000	1440000	1260000
P83917	Cbx1	NA	NA	NA	NA	NA	143701	338913	NA	NA	NA	NA	108703	88033	170860
P23198	Cbx3	210161	257333	302089	243271	279597	237595	265439	282321	221209	150707	284612	447069	297950	201476
Q9D8X2	Ccdc124	1050000	848088	926658	960065	1570000	NA	986179	NA	521949	1130000	NA	1180000	829782	650358
Q3UHB8	Ccdc177	NA	NA	58134.4	NA	NA	88479.6	130650	NA	NA	NA	45505.3	285327	205221	NA
Q8CH18	Ccar1	201887	215801	198350	142677	184271	133750	NA	NA	172899	41958	20549.2	439889	394250	188758
Q8VDP4	Ccar2	275222	324760	365279	203088	277049	277347	381999	366445	331883	265049	374007	1130000	429338	286223
Q9JIG7	Ccdc22	211140	84815.4	248772	207963	195075	241757	547646	270682	82856.8	143746	301213	321139	289462	181726
Q9CR29	Ccdc43	371297	349265	176232	230828	341237	419245	514875	202268	304873	152333	147273	197144	210414	530709
Q9D024	Ccdc47	533562	646472	514955	666910	657138	602694	342560	508828	521291	569070	551531	573779	505532	512775
D3YZP9	Ccdc6	105372	128950	126459	82978.5	NA	108645	85584.3	112866	98193.5	92543.5	100499	132050	104180	57214.6
Q9JJV5	Cacng3	NA	NA	74412.2	NA	NA	156362	181555	NA	NA	NA	91927.9	681511	502217	NA
Q8VHW2	Cacng8	NA	NA	55200.8	NA	NA	113574	NA	NA	NA	NA	38716.8	475634	175014	NA
P53702	Hccs	147416	118016	101469	128495	183361	144551	NA	NA	NA	128137	NA	157581	124251	NA
Q8BGU5	Ccny	202795	155788	214634	230183	250024	435071	232721	261994	368956	265596	199543	574567	298335	308640
Q9WU84	Ccs	NA	274569	490043	336150	450575	485238	537370	NA	476027	865856	534727	239991	488717	505130
Q8QZT2	Ccsap	NA	NA	NA	NA	NA	39922.5	28565.2	NA	NA	26492.5	NA	157512	64927.7	NA
E0CYV9	NA	710529	663483	779246	907393	772067	828315	511637	743273	995276	792360	535842	307027	527281	636717
Q8CII2	Cdc123	99305.6	76988.8	131266	104397	NA	87450.2	NA	75066.8	127087	223260	133921	113625	NA	155300
Q61490	Alcam	NA	471378	NA	NA	NA	182526	323953	145315	NA	NA	NA	964434	505169	NA
Q08857	Cd36	2040000	1720000	1780000	2380000	2770000	1920000	3900000	3150000	3060000	2080000	3200000	2090000	2610000	2370000
P15379	Cd44	195920	348435	144795	197296	260773	193281	162485	95213	205125	101271	221489	205347	NA	136738
Q61735	Cd47	483303	450137	550127	226811	395217	565816	1670000	470142	303713	89386.1	309321	2210000	946265	273583
P35762	Cd81	510027	507200	1200000	423912	394546	947427	3230000	755308	529254	562959	255692	1970000	944488	737853
P40240	Cd9	241413	426490	520394	481103	594538	549103	766821	554994	927261	260066	350702	1150000	783185	420230
Q61081	Cdc37	407605	501985	558938	481997	525459	607888	765465	475057	450953	501111	502624	1250000	830184	544026
P60766	Cdc42	2270000	2200000	2240000	2030000	1870000	2370000	1800000	2060000	1640000	1730000	1910000	4880000	2870000	1820000
Q6A068	Cdc5l	204090	339028	105653	232161	206340	187858	237708	251255	175664	135404	190528	469548	315658	143288
Q8VDP6	Cdipt	1820000	1520000	2810000	3570000	2600000	1410000	2390000	1680000	2340000	1510000	2040000	4040000	2090000	1570000
Q04899	Cdk18	83308.7	73424.4	90169.8	NA	NA	NA	NA	NA	NA	71502.5	NA	448083	123361	NA
P49615	Cdk5	469742	188259	522062	214742	517281	452950	794034	213206	296331	350501	383852	1440000	864259	501872
Q8CC36	Cdnf	433280	207239	258807	98967.3	299030	211616	288532	243667	NA	222487	73810.8	222270	150634	174711
Q99L43	Cds2	507527	770869	809610	400276	784899	406871	1450000	774447	624269	564949	628785	2410000	2020000	679933
Q4VAA2	Cdv3	635582	674719	760380	769554	641002	611348	453363	590401	647800	703724	643491	800127	683096	453681
Q6A065	Cep170	NA	NA	22570.4	NA	NA	NA	NA	NA	NA	NA	NA	80032.4	24124.2	NA
D3Z1D3	CEFIP	762648	655988	637148	794271	623428	411444	452550	537506	493825	576884	418148	372944	338761	372005
P28659	Celf1	NA	172807	219517	NA	NA	159885	NA	NA	211309	143558	389991	248084	259061	58635.6
Q9Z0H4	Celf2	75633.5	NA	250002	NA	135594	287544	428852	175451	NA	197512	104970	387881	96057.8	434692
Q9CXS4	Cenpv	769990	958451	1170000	1060000	1040000	1140000	1450000	1040000	1540000	1030000	872948	2000000	1530000	880116
Q8BGS7	Cept1	1320000	5310000	3210000	1970000	2660000	1630000	3100000	1730000	4310000	2120000	1640000	1170000	2250000	4270000
Q9EQG9	Cert1	98864.7	167999	101434	171457	111232	117646	123744	103985	141969	168263	219410	165623	190029	225362
Q61147	Cp	469462	710644	666213	612097	598729	575429	566996	657038	749009	668019	686854	541479	510070	442478
P04186	Cfb	442051	436694	540515	492294	415973	389469	452917	304821	468292	533057	503590	347862	510451	258018
P03953	Cfd	304143	567651	753622	436089	479686	537705	856105	625536	1180000	797676	878338	560757	960737	503512
P06909	Cfh	404403	772573	656802	407444	399010	562025	665882	539369	645894	720996	501780	566463	581473	657467
Q8VCN5	Cth	NA	NA	NA	NA	NA	NA	170240	NA	NA	NA	NA	233477	211748	NA
Q8VE95	NA	774948	501357	583753	619317	419409	534531	426786	461723	328278	523642	527454	379359	649836	421683
Q64433	Hspe1	4850000	3170000	4480000	3490000	4500000	4040000	6490000	3010000	2850000	3040000	3100000	4760000	2890000	4820000
P63038	Hspd1	9680000	6160000	7370000	8730000	8450000	7060000	7660000	5930000	6360000	5620000	6830000	11200000	7930000	6680000
Q9D1L0	Chchd2	222804	68667.6	172195	181361	140647	25438.7	49175.8	163545	100502	41360.4	44029	109515	125913	19693.3
Q6PDQ2	Chd4	276063	217783	365418	320906	265863	317618	375604	300328	231279	181189	255789	591914	362153	124404
O35744	Chil3	224296	280536	193158	318881	243894	366660	NA	284233	305935	275284	288750	210544	184571	348021
O55229	Chkb	278478	261665	108331	150245	338743	253799	125340	410434	218975	169753	245933	438208	350203	262025
Q9DB34	Chmp2a	263771	349457	162714	253759	237884	203851	599078	399352	NA	186796	137758	326234	425121	231901
Q9D7S9	Chmp5	399438	358690	542617	331298	411085	554186	828870	285637	411856	480456	382960	760427	498257	395300
Q8R1T1	Chmp7	51674.2	NA	22735.8	32756.7	101654	NA	NA	91303.1	130575	64047.5	NA	64347.8	43871.5	39216.6
Q9D1P4	Chordc1	758650	902403	851690	981641	956904	1120000	819326	811869	873081	909132	857162	1270000	896391	996214
Q9CR86	Carhsp1	216799	216070	605834	154469	200691	402492	906956	525186	352307	378592	337237	827707	314105	84151.6
Q9CWX2	Ndufaf1	484070	305128	295761	341801	384914	334343	360253	306406	324140	227826	323060	405472	425855	368037
D3Z7H8	Cilp2	3080000	5060000	832027	4020000	2210000	541170	702648	1520000	2190000	1760000	1860000	2940000	3240000	2560000
Q8CJ53	Trip10	824992	700271	656503	733982	681694	682951	403293	725174	706641	612115	726070	589536	636110	635120
Q91WS0	Cisd1	4880000	2100000	3190000	2530000	3080000	2830000	3240000	3180000	2340000	2040000	2080000	3100000	2950000	2750000
B1AR13	Cisd3	188559	121107	184805	165263	126955	107245	NA	169250	134341	131571	151012	143993	174857	NA
Q9CZU6	Cs	55600000	20100000	27200000	24900000	32300000	23000000	21900000	27200000	20800000	18500000	18500000	33300000	27100000	21400000
Q91V76	NA	399787	225522	422153	290544	257886	330386	541285	491538	500819	238243	533597	480832	329547	329322
Q8BMK4	Ckap4	333077	716350	410731	712615	487071	351191	667527	NA	533842	611051	405802	1120000	384529	474336
A2AGT5	Ckap5	491710	475873	384901	372559	339820	370676	537307	506297	427935	423647	372346	859616	685483	410712
Q80TV8	Clasp1	107036	85187.4	81909.1	96147.2	114441	161678	105800	152628	150588	NA	127617	204165	99243.7	NA
Q8BRT1	Clasp2	491751	426912	612677	480754	493607	653862	566021	472006	447941	566529	478446	1780000	1010000	436091
P49300	Clec10a	213072	320462	289109	226831	130377	218847	646332	479548	550562	418119	198496	427965	211983	508217
O08585	Clta	646252	848950	1950000	310069	284958	1910000	2360000	NA	659860	148350	586425	3390000	NA	1970000
Q6IRU5	Cltb	364021	330629	584629	174916	772685	491427	770637	NA	NA	395775	219074	871109	564301	594263
Q64347	Clcn1	1070000	799984	983513	616394	803500	977072	1020000	897834	1020000	1140000	688819	698764	1040000	1930000
O35454	Clcn6	19475.6	NA	NA	NA	NA	NA	NA	NA	NA	NA	NA	88385.5	NA	NA
Q68FD5	Cltc	4420000	4140000	6280000	3640000	6340000	7270000	10000000	3820000	4030000	3870000	5770000	29600000	17400000	5220000
[truncated: 3,046 more rows]

## Sheet: Muscle_DE
Uniprot ID	Gene Name	logFC	P.Value
P50446	KRT6A	2.3389	0.0235
E9Q0F0	KRT78	2.1472	0.0411
[truncated: 2,707 more rows]

## Sheet: Muscle_GO
Category	Term	Count	%	PValue	Genes	List Total	Pop Hits	Pop Total	Fold Enrichment	Bonferroni	Benjamini	FDR
[truncated: 66 more rows]

[truncated: 3 more sheets: Cortex_raw, Cortex_DE, Cortex_GO]
