# Supplementary material for: Uncovering shared and tissue-specific molecular adaptations to intermittent fasting in liver, brain, and muscle
Source: eLife. 2026 Apr 17;14:RP107332. doi: 10.7554/eLife.107332 (PMC13090031; doi:10.7554/eLife.107332)
Supplement: Supplementary file 2. [file elife-107332-supp2.xlsx]

## Sheet: Liver_KEGG
Category	Term	Count	%	PValue	Genes	List Total	Pop Hits	Pop Total	Fold Enrichment	Bonferroni	Benjamini	FDR
KEGG_PATHWAY	mmu01100:Metabolic pathways	212	24.4804	3.41106e-40	Q9WUR9, O35490, Q99K67, Q9WTP6, Q8QZY2, Q8BTZ7, Q91X77, Q91VT4, Q2TBE6, Q60597, Q61205, P03958, Q99J39, P54869, P13634, O70362, Q571F8, A6H6J2, Q9DB25, P17563, P32020, P46412, Q9Z2V4, P29416, P54071, Q9R092, Q9DB20, Q63836, P97325, P19157, P97328, Q8R1S0, Q91VA7, P00329, Q921V5, Q8JZK9, Q3TDQ1, P22315, Q8K297, Q91Y74, Q91X52, P50285, P23780, Q9DCC4, Q8R3F5, Q8VCZ9, Q64374, Q99JR6, Q8K3K7, P53798,…	513	1625	9463	2.40654	1.05743e-37	1.05743e-37	8.97108e-38
KEGG_PATHWAY	mmu00071:Fatty acid degradation	17	1.96305	7.22816e-09	Q9WUR2, Q91WL5, Q8JZR0, Q99JY0, P51174, Q9CX98, P52825, Q9DBF1, P50544, Q8CAY6, P42125, P00329, Q07417, Q8BWT1, O35728, Q8BMS1, P41216	513	52	9463	6.03055	2.24073e-06	8.92893e-07	7.57519e-07
KEGG_PATHWAY	mmu01240:Biosynthesis of cofactors	29	3.34873	8.6409e-09	Q64669, P51163, Q8CC86, Q9WTP7, Q9WUR9, Q9DBL7, P58710, Q64105, Q9WTP6, Q8R1S0, Q8R084, Q8CGC7, Q91X91, Q99LB6, Q8BTZ7, P22315, P51175, Q64374, P51855, K9J7B2, Q99JR6, Q78JT3, P12265, P17717, P48776, O09172, Q9R092, Q8BMS4, Q9CXI0	513	152	9463	3.51938	2.67868e-06	8.92893e-07	7.57519e-07
KEGG_PATHWAY	mmu01212:Fatty acid metabolism	18	2.07852	1.71168e-08	Q8R3F5, P50171, Q8JZR0, Q99JY0, Q5SWU9, P51174, P52825, P50544, Q8CAY6, Q07417, Q8BWT1, P32020, Q920L1, Q9DCS3, O70503, Q8BMS1, P41216, Q91VT4	513	62	9463	5.3554	5.3062e-06	1.32655e-06	1.12543e-06
KEGG_PATHWAY	mmu00140:Steroid hormone biosynthesis	21	2.42494	1.01715e-07	Q64458, P56655, P56654, P50171, Q05421, P51658, K9J7B2, Q64464, A6H6J2, Q60991, Q8R084, Q6XVG2, O88736, P17717, Q9JKY7, Q8CIM7, Q91X77, O70503, Q9R092, P24456, Q91W64	513	94	9463	4.121	3.15311e-05	6.30632e-06	5.3502e-06
KEGG_PATHWAY	mmu04146:Peroxisome	20	2.30947	1.37128e-07	Q9WUR2, P24270, Q8JZR0, P99029, Q99J39, Q99P30, A2AKK5, O35459, Q8BGI5, O35488, P32020, Q5BL07, Q9DC50, P38060, P55096, P98192, P41216, Q9QXD1, P54071, Q9JJW0	513	87	9463	4.24055	4.25089e-05	7.08496e-06	6.01079e-06
KEGG_PATHWAY	mmu01200:Carbon metabolism	23	2.65589	4.39374e-07	Q60597, Q61753, Q9D6R2, P24270, Q64374, Q9Z2I8, Q9D051, A6ZI46, Q9CQ60, Q8CAY6, Q91VA7, P12382, Q05920, Q07417, Q00612, Q9Z2I9, Q8CFA2, Q9CZB0, Q99KI0, Q8CHP8, Q8QZY2, P54071, S4R1W1	513	121	9463	3.50634	0.000136197	1.9458e-05	1.65079e-05
KEGG_PATHWAY	mmu00830:Retinol metabolism	20	2.30947	8.25919e-07	Q64458, P56655, P56654, Q91WL5, K9J7B2, Q64464, A6H6J2, Q8R084, P00329, Q6XVG2, Q8VCH7, P17717, G3X982, P56593, O54754, O35728, Q91X77, P20852, Q9R092, Q91W64	513	97	9463	3.80338	0.000256002	3.20044e-05	2.71521e-05
KEGG_PATHWAY	mmu00280:Valine, leucine and isoleucine degradation	15	1.7321	1.37719e-06	Q3ULD5, Q99JY0, P53395, Q9DBF1, P54869, Q99L13, Q9D2R0, Q8CAY6, Q07417, Q8JZK9, Q8BWT1, G3X982, P38060, O54754, Q8BMS1	513	57	9463	4.85431	0.000426838	4.74365e-05	4.02445e-05
KEGG_PATHWAY	mmu05204:Chemical carcinogenesis - DNA adducts	18	2.07852	1.94645e-06	P10649, Q64458, P56655, P56654, P10648, Q05421, P15626, K9J7B2, Q64464, P19157, Q61133, Q8R084, Q6XVG2, P19639, P17717, Q91X77, Q91W64	513	84	9463	3.9528	0.000603218	6.03399e-05	5.11916e-05
KEGG_PATHWAY	mmu00020:Citrate cycle (TCA cycle)	11	1.27021	4.31235e-06	Q60597, Q91VA7, Q9D6R2, Q05920, Q9Z2I9, Q9CZB0, Q99KI0, Q9Z2I8, Q9Z2V4, Q9D051, P54071	513	32	9463	6.34095	0.00133594	0.000107016	9.07913e-05
KEGG_PATHWAY	mmu00982:Drug metabolism - cytochrome P450	16	1.84758	4.45941e-06	P10649, P50285, P97872, P10648, Q05421, P15626, K9J7B2, P19157, Q61133, Q8R084, P00329, P19639, P17717, G3X982, O54754	513	71	9463	4.15693	0.00138147	0.000107016	9.07913e-05
KEGG_PATHWAY	mmu03320:PPAR signaling pathway	18	2.07852	4.48778e-06	Q60994, Q9Z1P8, Q91WL5, Q8C7G5, Q8JZR0, P51174, P52825, P54869, Q05816, Q8JZK9, O35488, P32020, O88962, O35728, Q9Z2V4, P55050, P41216, Q9QXD1	513	89	9463	3.73073	0.00139025	0.000107016	9.07913e-05
KEGG_PATHWAY	mmu00650:Butanoate metabolism	10	1.15473	7.22537e-06	Q07417, Q80XN0, Q8JZK9, P38060, Q8BWF0, P54869, Q8BMS1, Q91VA0, Q8CAY6, Q9D2R0	513	27	9463	6.832	0.00223737	0.00015999	0.000135734
KEGG_PATHWAY	mmu00983:Drug metabolism - other enzymes	17	1.96305	2.20928e-05	P10649, P10648, Q05421, O55060, P15626, K9J7B2, P19157, Q99N42, P12265, Q61133, Q8R084, P19639, P17717, Q8BK48, P23953, Q8CGR7	513	90	9463	3.48432	0.00682544	0.000456585	0.00038736
KEGG_PATHWAY	mmu00980:Metabolism of xenobiotics by cytochrome P450	15	1.7321	3.48923e-05	P10649, P10648, Q8CG76, Q05421, P15626, P33267, K9J7B2, P19157, Q61133, Q8R084, P00329, P19639, P17717, Q8K354	513	74	9463	3.73913	0.0107585	0.000659358	0.000559391
KEGG_PATHWAY	mmu00061:Fatty acid biosynthesis	8	0.923788	3.7126e-05	Q8R3F5, P50171, Q8JZR0, Q5SWU9, E9Q4Z2, Q9DCS3, P41216, Q91VT4	513	19	9463	7.7669	0.0114433	0.000659358	0.000559391
KEGG_PATHWAY	mmu00260:Glycine, serine and threonine metabolism	11	1.27021	3.82853e-05	Q8BJ64, Q61753, O88986, Q8CFA2, Q9DBF1, Q8QZY2, Q6XPS7, P15327, O35490, O35969, Q8VCN5	513	40	9463	5.07276	0.0117985	0.000659358	0.000559391
KEGG_PATHWAY	mmu00590:Arachidonic acid metabolism	16	1.84758	4.34798e-05	Q64458, P56655, P56654, Q91WL5, Q9CX98, Q05421, A6H6J2, Q8BGC4, Q6XVG2, Q8VCC1, O35728, Q9DB60, Q91X77, O54749, Q8K354, Q91W64	513	85	9463	3.47226	0.0133886	0.000709408	0.000601853
KEGG_PATHWAY	mmu01230:Biosynthesis of amino acids	15	1.7321	7.41996e-05	Q61753, Q9D6R2, Q99JW2, Q9DCC4, P11725, A6ZI46, Q8VCN5, Q91VA7, P12382, Q05920, Q99KI0, Q99LB6, Q6XPS7, P54071, S4R1W1	513	79	9463	3.50248	0.0227402	0.00115009	0.000975725
KEGG_PATHWAY	mmu00480:Glutathione metabolism	14	1.61663	0.000109452	P10649, P10648, P51855, P15626, P19157, Q61133, P19639, Q00612, O09172, Q8CHQ9, P46412, Q9JIY7, P54071	513	72	9463	3.5868	0.0333627	0.00161572	0.00137075
KEGG_PATHWAY	mmu04141:Protein processing in endoplasmic reticulum	22	2.54042	0.0003538	Q9D1M0, Q9DBH5, P16627, P11499, P35564, Q9R049, O35350, Q99J56, Q9D662, Q8R180, Q61696, Q78XF5, Q8VHE0, P46978, O08795, P14211, Q8BNI4, P17879, P61079, Q9QZN4, P60670, Q3TDQ1	513	171	9463	2.37322	0.103895	0.00487414	0.00413515
KEGG_PATHWAY	mmu01210:2-Oxocarboxylic acid metabolism	9	1.03926	0.000361629	Q60597, Q91VA7, Q9D6R2, Q99JW2, Q9WVM8, P53395, Q99KI0, Q9D051, P54071	513	34	9463	4.88287	0.106068	0.00487414	0.00413515
KEGG_PATHWAY	mmu04610:Complement and coagulation cascades	15	1.7321	0.000492979	Q8BH35, Q64735, P03953, P08607, Q07235, Q8VCM7, P06909, Q06890, Q08761, Q8K0E8, P16294, Q00896, P06683, E9PV24, P98086	513	94	9463	2.94357	0.141751	0.00636765	0.00540223
KEGG_PATHWAY	mmu00062:Fatty acid elongation	8	0.923788	0.000716904	Q3UUI3, O55137, Q9QYR7, Q8BWT1, Q99JY0, Q9DCS3, O70503, Q8BMS1	513	29	9463	5.08866	0.199341	0.00888961	0.00754183
KEGG_PATHWAY	mmu05014:Amyotrophic lateral sclerosis	36	4.15704	0.000858875	A2AQ07, Q8BL97, Q9D1M0, Q8K3J1, Q9CQQ7, O35593, Q3UHA3, Q7TMF3, Q9R1P3, Q9WVJ2, F6ZDS4, Q8R5C5, Q80W47, Q9CZB0, O35683, P84104, Q9CZ13, P06683, Q8R1I1, Q9DB77, Q64337, P49312, P24270, Q9CQZ5, P63260, Q99J56, Q9CPX8, Q9CQ54, O35613, O09110, P46412, Q8BG05, A0A571BD48, Q9DB20	513	370	9463	1.79478	0.233841	0.0102404	0.00868785
KEGG_PATHWAY	mmu00640:Propanoate metabolism	8	0.923788	0.00109943	Q07417, Q9Z2I9, Q5SWU9, P53395, E9Q4Z2, Q99J39, Q9Z2I8, Q8BMS1	513	31	9463	4.76036	0.288949	0.0126231	0.0107093
KEGG_PATHWAY	mmu00380:Tryptophan metabolism	10	1.15473	0.00169366	P24270, Q9WVM8, P40936, P48776, G3X982, O54754, Q9DBF1, Q8BMS1, Q78JT3, Q8CAY6	513	52	9463	3.54738	0.408728	0.0187512	0.0159083
KEGG_PATHWAY	mmu00513:Various types of N-glycan biosynthesis	9	1.03926	0.00188129	P46978, Q9DBE8, Q921V5, P20060, P97325, P15535, Q3TDQ1, P29416, Q78XF5	513	43	9463	3.86087	0.442197	0.0201103	0.0170613
KEGG_PATHWAY	mmu00920:Sulfur metabolism	5	0.577367	0.00206012	Q9DCM0, P17563, Q63836, Q60967, Q99J99	513	11	9463	8.38472	0.472336	0.0212879	0.0180604
KEGG_PATHWAY	mmu05208:Chemical carcinogenesis - reactive oxygen species	24	2.77136	0.00229258	P10649, Q64669, P24270, Q8K3J1, P10648, Q9CQQ7, Q05421, P15626, P33267, Q7TMF3, Q9CQZ5, Q61462, Q61133, Q9CPX8, Q9CQ54, P58735, P19639, Q9CZB0, O35683, Q9CZ13, P48962, Q8R1I1, Q9DB77, Q9DB20	513	224	9463	1.9764	0.509101	0.0229258	0.01945
KEGG_PATHWAY	mmu00100:Steroid biosynthesis	6	0.692841	0.00357827	Q9Z0M5, O88736, Q71KT5, Q8VCH6, P70245, P53798	513	20	9463	5.53392	0.670854	0.0346645	0.0294089
KEGG_PATHWAY	mmu04613:Neutrophil extracellular trap formation	22	2.54042	0.00425679	Q64735, P62806, P24063, P63260, E9PV24, Q8VCM7, P48962, Q61462, P20444, Q8K0E8	513	208	9463	1.95106	0.73351	0.039988	0.0339253
KEGG_PATHWAY	mmu00591:Linoleic acid metabolism	9	1.03926	0.0050005	Q64458, P56655, P56654, Q6XVG2, Q05421, Q64464, Q91X77, O54749, Q91W64	513	50	9463	3.32035	0.788609	0.0455928	0.0386804
KEGG_PATHWAY	mmu05415:Diabetic cardiomyopathy	22	2.54042	0.00530354	Q8K3J1, Q9CQQ7, P52825, P18242, Q7TMF3, Q9CQZ5, Q9D051, Q61462, Q9CPX8, Q9CQ54, O55143, Q00612, Q9CZB0, O35683, Q9JK42, Q9CZ13, P48962, P20444, Q8R1I1, Q9DB77, S4R1W1, Q9DB20	513	212	9463	1.91425	0.807656	0.0469742	0.0398523
KEGG_PATHWAY	mmu00053:Ascorbate and aldarate metabolism	7	0.808314	0.0056345	Q8R084, P17717, Q64374, K9J7B2, Q9DBF1, P58710, P12265	513	31	9463	4.16531	0.82651	0.0485193	0.0411631
KEGG_PATHWAY	mmu05322:Systemic lupus erythematosus	17	1.96305	0.00664373	P62320, Q8BH35, P62806, P06683, P98086	513	149	9463	2.10462	0.873363	0.0550324	0.0466888
KEGG_PATHWAY	mmu00760:Nicotinate and nicotinamide metabolism	8	0.923788	0.00674591	P23492, Q91X91, G3X982, Q8CC86, Q8VDQ8, O54754, Q99JR6, O55239	513	42	9463	3.5136	0.877337	0.0550324	0.0466888
KEGG_PATHWAY	mmu00860:Porphyrin metabolism	8	0.923788	0.00769181	Q8CGC7, Q8R084, P51175, P51163, P17717, K9J7B2, P22315, P12265	513	43	9463	3.43189	0.908707	0.06114	0.0518704
KEGG_PATHWAY	mmu00620:Pyruvate metabolism	8	0.923788	0.00873216	P00329, Q05920, Q5SWU9, E9Q4Z2, Q9DBF1, Q9Z2V4, Q9D051, Q8CAY6	513	44	9463	3.35389	0.93405	0.0676743	0.057414
KEGG_PATHWAY	mmu05020:Prion disease	25	2.88684	0.010391	A2AQ07, Q8BH35, Q8K3J1, Q9CQQ7, O35593, P16627, Q7TMF3, Q9CQZ5, Q9R1P3, Q9WVJ2, Q61462, Q9CPX8, Q9CQ54, Q61696, P17879, Q9CZB0, O35683, Q9CZ13, P06683, P48962, Q8R1I1, Q9DB77, P98086, Q9DB20	513	268	9463	1.72075	0.960761	0.0785664	0.0666547
KEGG_PATHWAY	mmu00040:Pentose and glucuronate interconversions	7	0.808314	0.011867	Q8R084, P17717, P45376, K9J7B2, Q99KP3, P12265, Q91X52	513	36	9463	3.5868	0.975295	0.0875895	0.0743098
KEGG_PATHWAY	mmu00120:Primary bile acid biosynthesis	5	0.577367	0.0141303	P32020, O88962, Q9QXD1, Q60991, A2AKK5	513	18	9463	5.124	0.987865	0.0963977	0.0817825
KEGG_PATHWAY	mmu00511:Other glycan degradation	5	0.577367	0.0141303	O09159, O35657, P23780, P20060, P29416	513	18	9463	5.124	0.987865	0.0963977	0.0817825
KEGG_PATHWAY	mmu04714:Thermogenesis	22	2.54042	0.0141877	Q8JZR0, Q8K3J1, Q9CQQ7, P52825, Q7TMF3, Q9CQZ5, Q921H9, P63260, A2AIL4, Q9Z0H3, Q9EP53, Q9CPX8, Q9CQ54, O09110, Q9CZB0, O35683, Q9CWG8, Q9CZ13, P41216, Q8R1I1, Q9DB77, Q9DB20	513	232	9463	1.74923	0.988082	0.0963977	0.0817825
KEGG_PATHWAY	mmu04142:Lysosome	15	1.7321	0.0143042	P23780, Q9Z0M5, Q61207, P20060, P97821, P18242, Q07113, P12265, O09159, O35657, P50429, Q9QWR8, P22892, P24668, P29416	513	135	9463	2.0496	0.98851	0.0963977	0.0817825
KEGG_PATHWAY	mmu03010:Ribosome	18	2.07852	0.0160334	P62908, Q9CPR5, Q6ZWY3, Q9CQ06, P14206, Q9CQR2, Q9CQP0, Q9D1P0, P47915, P63323, P83882, Q9D8P4, P27659, Q924T2, Q9D7N3, P62983, P61514, P62843	513	178	9463	1.86537	0.993333	0.105752	0.0897188
KEGG_PATHWAY	mmu00785:Lipoic acid metabolism	5	0.577367	0.0171499	Q60597, Q8CFA2, P53395, Q9D051, Q91VA0	513	19	9463	4.85431	0.995311	0.11076	0.093967
KEGG_PATHWAY	mmu00130:Ubiquinone and other terpenoid-quinone biosynthesis	4	0.461894	0.0187543	Q8R1S0, Q64669, Q9CXI0, Q8BMS4	513	11	9463	6.70778	0.997174	0.117961	0.100077
KEGG_PATHWAY	mmu04144:Endocytosis	24	2.77136	0.019026	Q9CQ26, P06339, P70182, Q60953, P51150, Q9D8S3, Q05685, P16627, A2A5R2, P59999, P17427, Q07113, Q61696, Q9QUI0, Q9CWK8, P17879, Q9D8B3, Q8CFI0, Q8VDD8, Q8BL66, P40336, P62743, P0C7L0, Q8C142	513	268	9463	1.65192	0.997407	0.117961	0.100077
KEGG_PATHWAY	mmu04216:Ferroptosis	7	0.808314	0.0195068	P09528, Q8JZR0, O09172, P51855, P29391, P41216, Q5U4H9	513	40	9463	3.22812	0.997773	0.118571	0.100594
KEGG_PATHWAY	mmu05016:Huntington disease	26	3.00231	0.0231312	A2AQ07, Q8K3J1, Q9CQQ7, O35593, Q7TMF3, Q9CQZ5, Q9R1P3, Q9WVJ2, P17427, Q9CPX8, Q9CQ54, Q8R5C5, Q80W47, Q9CZB0, O35683, Q9CZ13, P06683, P46412, P48962, Q8R1I1, Q9DB77, P62743, A0A571BD48, Q9DB20	513	303	9463	1.58286	0.999293	0.137595	0.116734
KEGG_PATHWAY	mmu05022:Pathways of neurodegeneration - multiple diseases	37	4.27252	0.0235244	A2AQ07, Q811U4, Q8K3J1, Q9CQQ7, O35593, Q3UHA3, Q7TMF3, Q9R1P3, O35350, Q9WVJ2, O55042, Q8R5C5, Q80W47, Q9CZB0, O35683, Q9CZ13, P06683, P48962, Q8R1I1, Q9DB77, Q64337, P24270, Q9CQZ5, Q99J56, Q9CPX8, Q9CQ54, O35613, O55143, O09110, Q02248, P46412, P62983, P20444, A0A571BD48, Q9DB20	513	473	9463	1.44295	0.999376	0.137595	0.116734
KEGG_PATHWAY	mmu00531:Glycosaminoglycan degradation	5	0.577367	0.0243197	P23780, P50429, P20060, P29416, P12265	513	21	9463	4.392	0.999515	0.139613	0.118446
KEGG_PATHWAY	mmu04726:Serotonergic synapse	14	1.61663	0.0247854	Q64458, P56655, P56654, P62880, Q9DAS9, Q6XVG2, Q9JKY7, Q8CIM7, Q91X77, O54749, P20444, P24456, Q91W64	513	131	9463	1.97137	0.999582	0.139699	0.118519
KEGG_PATHWAY	mmu00630:Glyoxylate and dicarboxylate metabolism	6	0.692841	0.0272883	P24270, Q8CFA2, Q99KI0, Q8CHP8, Q8QZY2, Q8CAY6	513	32	9463	3.4587	0.999812	0.15106	0.128157
KEGG_PATHWAY	mmu00600:Sphingolipid metabolism	8	0.923788	0.0278425	O35657, P23780, Q61207, P20060, Q924Z4, Q8R0X7, P29416, Q09200	513	55	9463	2.68311	0.999842	0.151424	0.128466
KEGG_PATHWAY	mmu00030:Pentose phosphate pathway	6	0.692841	0.0345393	P12382, Q00612, Q64374, Q8QZY2, A6ZI46, Q9CQ60	513	34	9463	3.25525	0.999981	0.181478	0.153963
KEGG_PATHWAY	mmu01040:Biosynthesis of unsaturated fatty acids	6	0.692841	0.0345393	O55137, Q9QYR7, P32020, Q920L1, O70503, A2AKK5	513	34	9463	3.25525	0.999981	0.181478	0.153963
KEGG_PATHWAY	mmu00604:Glycosphingolipid biosynthesis - ganglio series	4	0.461894	0.0440595	P23780, P20060, P29416, Q09200	513	15	9463	4.91904	0.999999	0.227641	0.193128
KEGG_PATHWAY	mmu05100:Bacterial invasion of epithelial cells	9	1.03926	0.0522034	Q61301, Q8BUR4, Q8CHH9, Q9QUI0, Q64727, Q02248, Q61140, P63260, P59999	513	76	9463	2.18444	1	0.262638	0.222819
KEGG_PATHWAY	mmu05012:Parkinson disease	22	2.54042	0.0525276	A2AQ07, Q811U4, Q8K3J1, Q9CQQ7, O35593, Q7TMF3, Q9CQZ5, Q9R1P3, Q9WVJ2, O55042, Q9CPX8, Q9CQ54, O35613, Q9CZB0, O35683, Q9CZ13, P06683, P48962, P62983, Q8R1I1, Q9DB77, Q9DB20	513	266	9463	1.52564	1	0.262638	0.222819
KEGG_PATHWAY	mmu05418:Fluid shear stress and atherosclerosis	14	1.61663	0.0549097	P10649, Q64337, Q64669, P10648, P15626, P11499, P63260, P19157, Q61462, Q61133, Q9QUI0, P19639, Q02248	513	147	9463	1.7568	1	0.27019	0.229226
KEGG_PATHWAY	mmu05203:Viral carcinogenesis	19	2.194	0.0642344	P06339, Q9QUI0, P13020, Q03963, P62806, O08759, A2AN08	513	226	9463	1.5508	1	0.301489	0.25578
KEGG_PATHWAY	mmu00190:Oxidative phosphorylation	13	1.50115	0.0643151	Q8K3J1, Q9CQQ7, Q7TMF3, Q9CQZ5, Q9CPX8, Q9CQ54, Q9CZB0, O35683, Q9CZ13, Q8R1I1, Q9DB77, Q9DB20, Q9D819	513	136	9463	1.76326	1	0.301489	0.25578
KEGG_PATHWAY	mmu00970:Aminoacyl-tRNA biosynthesis	8	0.923788	0.0647497	Q9CZN8, Q8CGC7, Q8BIP0, Q8BYM8, Q8CFI5, Q8BU30, Q14CH7, Q9D0R2	513	66	9463	2.23593	1	0.301489	0.25578
KEGG_PATHWAY	mmu00510:N-Glycan biosynthesis	7	0.808314	0.0651606	P46978, Q9DBE8, Q9DB25, Q921V5, P15535, Q3TDQ1, Q78XF5	513	53	9463	2.43632	1	0.301489	0.25578
KEGG_PATHWAY	mmu00010:Glycolysis / Gluconeogenesis	8	0.923788	0.0691085	P12382, P00329, Q9DBF1, A6ZI46, Q9Z2V4, Q9D051, P15327, S4R1W1	513	67	9463	2.20255	1	0.315054	0.267287
KEGG_PATHWAY	mmu00270:Cysteine and methionine metabolism	7	0.808314	0.0753034	Q61753, Q99LB6, O09172, P51855, O35490, Q8VCN5, Q99J99	513	55	9463	2.34772	1	0.338319	0.287026
KEGG_PATHWAY	mmu05171:Coronavirus disease - COVID-19	20	2.30947	0.0811109	P62908, Q8BH35, P03953, Q6ZWY3, P14206, Q8VCM7, Q9CQR2, Q8K0E8, P47915, P63323, Q03963, P83882, P06683, P27659, E9PV24, P62983, P20444, P98086, P61514, P62843	513	249	9463	1.48164	1	0.359205	0.304745
KEGG_PATHWAY	mmu01232:Nucleotide metabolism	9	1.03926	0.0836243	P23492, P08030, Q9WTP7, P97930, Q9WUR9, P03958, Q99N42, Q8CGR7, Q9WTP6	513	84	9463	1.9764	1	0.36512	0.309763
KEGG_PATHWAY	mmu05034:Alcoholism	17	1.96305	0.0892484	P62880, Q9DAS9, Q9JIM1, P62806	513	205	9463	1.5297	1	0.384264	0.326005

## Sheet: Liver_STRING_PPI
# background genes	# genes	category	chart color	description	FDR value	genes	network.SUID	nodes.SUID	p-value	term name
1534	210	KEGG Pathways		Metabolic pathways	1.66e-54	Dbt|Haao|Aox1|Agpat3|Cyp2c29|Inmt|Cyp4f18|Nqo1|Gstm3|Gstm1|Adh1|G6pdx|Pafah1b3|Cyp2b13|Cyp2a5|Gcat|Aprt|B4galnt1|Acat2|Neu1|Fads1|Pdhx|Gstm2|Cers2|Ndufa1|Ada|Qrsl1|Uqcr11|Pfkl|Pfas|Acot3|Gpld1|Mccc2|Hexb|Pdhb|Cryl1|Ndufa6|Naga|Aco2|Naprt|Tymp|Atp5o|Rgn|Acy1|Pla2g7|Keg1|Tm7sf2|Dcxr|Hexa|Cyp2e1|Gusb|Uqcrc1|Rdh10|Acadl|Trak2|Dtymk|Hsd17b7|Agpat2|Cat|Hsd17b12|Idh3b|Pck1|Car3|Car2|Tdo2|Papss1|Gclm|Coq…	803	1495|2641|3070|2974|1969|1843|1816|2647|3376|3349|2053|3109|2146|3226|3304|3259|3175|2905|2446|2410|3217|2884|1537|1525|3157|3076|2614|1396|2110|1477|1081|2278|1561|2983|2758|1240|3265|3271|2764|1558|3100|1369|1075|1810|1261|1930|2677|3214|1996|3103|2713|1555|2365|2143|1003|1663|1672|1060|1876|1891|2032|2272|2623|2659|3178|3415|1966|1714|1072|2533|2635|1138|3346|2260|1147|2059|1855|2806|997|3343|…	5e-57	mmu01100
362	32	KEGG Pathways		Amyotrophic lateral sclerosis	0.00032	Tubb1|Ndufa1|Map2k3|Uqcr11|Derl1|Ndufa6|Atp5o|Psmd13|Uqcrc1|Psmd14|Cat|Psmb2|Sec13|Ndufc2|Uqcrc2|Spg11|Hnrnpa1|Wipi2|Actr1b|Uqcr10|Srsf7|Actg1|Gpx3|Sqstm1|Sdhc|Hnrnpa3|Atp5pb|Srsf3|Tpr|Daxx|Ndufa12|Ndufs8	803	2290|3157|2803|1396|1252|3265|1369|3124|1555|1015|1876|3208|2536|2371|1783|1681|3394|1327|1765|3436|2722|1738|1867|2086|3037|1267|3016|2497|3058|1372|1228|1150	2.29e-05	mmu05014
250	24	KEGG Pathways		Endocytosis	0.00087	Ap2a2|Hspa1l|Rhoa|Igf2r|Chmp4b|Ldlrap1|Snx2|Eea1|Arfgap3|Stambp|Washc1|Pml|Ap2s1|Hspa1a|Vps26a|Arfgef2|H2-T23|Pip5k1a|Rab7|Arpc4|Wipf3|Hspa1b|Folr2|Nedd4l	803	3280|2443|1882|2863|1723|1303|3361|2206|3154|1564|2980|1159|1975|2095|2602|3364|3403|2218|2311|2230|2077|2914|1948|2668	7.35e-05	mmu04144
263	24	KEGG Pathways		Prion disease	0.0017	Hspa1l|Tubb1|Ndufa1|Cyba|Uqcr11|C9|Ndufa6|Atp5o|Psmd13|Uqcrc1|Psmd14|Psmb2|C8b|Ndufc2|Uqcrc2|Slc25a4|C1qa|Uqcr10|Hspa1a|Sdhc|Atp5pb|Hspa1b|Ndufa12|Ndufs8	803	2443|2290|3157|3091|1396|1039|3265|1369|3124|1555|1015|3208|1108|2371|1783|1696|2563|3436|2095|3037|3016|2914|1228|1150	0.00015	mmu05020
360	24	KEGG Pathways		Alzheimer disease	0.0418	Ctnnb1|Tubb1|Ndufa1|Uqcr11|Ndufa6|Atp5o|Eif2ak2|Capn1|Psmd13|Uqcrc1|Psmd14|Psmb2|Atp2a2|Ndufc2|Uqcrc2|Slc25a4|Lrp1|Wipi2|Uqcr10|Sdhc|Snca|Atp5pb|Ndufa12|Ndufs8	803	1204|2290|3157|1396|3265|1369|2596|1540|3124|1555|1015|3208|1105|2371|1783|1696|2545|1327|3436|3037|1711|3016|1228|1150	0.0077	mmu05010
122	23	KEGG Pathways		Carbon metabolism	1.62e-07	G6pdx|Acat2|Pfkl|Pdhb|Aco2|Rgn|Cat|Idh3b|Acads|Pgls|Amt|Glyctk|Pgp|Pcx|Phgdh|Aldoart1|Ogdh|Idh2|Sdhc|Hadha|Sucla2|Idh3a|Suclg2	803	3109|2446|2110|2758|2764|1075|1876|2032|3343|1786|2986|2815|3010|1888|2194|1006|1939|2923|3037|2893|2128|2581|1774	2.93e-09	mmu01200
169	22	KEGG Pathways		Protein processing in endoplasmic reticulum	4.45e-05	Calr|Hspa1l|Sec63|Lman2|Ero1l|Derl1|Hsp90ab1|Eif2ak2|Capn1|Sec23b|Sec13|Stt3b|Nploc4|Amfr|Hspa1a|Fbxo6|Prkcsh|Stt3a|Derl2|Hspa1b|Canx|Ube2d3	803	2500|2443|1822|3424|1486|1252|1378|2596|1540|1492|2536|2908|1174|2275|2095|2050|1363|1936|2473|2914|1357|2860	2.01e-06	mmu04141
225	22	KEGG Pathways		Thermogenesis	0.0013	Smarcb1|Ndufa1|Map2k3|Uqcr11|Ndufa6|Atp5o|Ndufaf7|Uqcrc1|Cpt2|Ndufc2|Uqcrc2|Acsl1|Acsl5|Uqcr10|Ndufaf6|Actg1|Sdhc|Tsc1|Atp5pb|Coa7|Ndufa12|Ndufs8	803	2167|3157|2803|1396|3265|1369|2605|1555|1135|2371|1783|1699|1465|3436|2419|1738|3037|1405|3016|1207|1228|1150	0.00011	mmu04714
297	22	KEGG Pathways		Huntington disease	0.0198	Ap2a2|Tubb1|Ndufa1|Uqcr11|Ndufa6|Atp5o|Psmd13|Uqcrc1|Psmd14|Psmb2|Ndufc2|Uqcrc2|Slc25a4|Wipi2|Actr1b|Uqcr10|Gpx3|Ap2s1|Sdhc|Atp5pb|Ndufa12|Ndufs8	803	3280|2290|3157|1396|3265|1369|3124|1555|1015|3208|2371|1783|1696|1327|1765|3436|1867|1975|3037|3016|1228|1150	0.0034	mmu05016
86	21	KEGG Pathways		Steroid hormone biosynthesis	4.21e-08	Cyp2c29|Cyp2b13|Cyp2d26|Cyp2d22|Cyp2e1|Hsd17b7|Hsd17b12|Ugt2b1|Cyp3a13|Hsd17b2|Cyp7b1|H2-Ke6|Cyp2c38|Cyp2c37|Cyp2c54|Cyp2c70|Ugt2b5|Cyp2d10|Cyp2c50|Ugt1a6b|Hsd17b6	803	1969|3226|1288|3262|3103|1672|1891|2806|3409|1441|3292|1090|2080|2734|1951|1684|1903|1648|2869|2653|2695	2.54e-10	mmu00140
238	21	KEGG Pathways		Parkinson disease	0.0045	Tubb1|Ndufa1|Uqcr11|Ndufa6|Atp5o|Psmd13|Uqcrc1|Psmd14|Psmb2|Ndufc2|Uqcrc2|Slc25a4|Uqcr10|Mfn1|Rps27a|Sdhc|Snca|Atp5pb|Daxx|Ndufa12|Ndufs8	803	2290|3157|1396|3265|1369|3124|1555|1015|3208|2371|1783|1696|3436|2941|2887|3037|1711|3016|1372|1228|1150	0.00057	mmu05012
85	20	KEGG Pathways		Peroxisome	9.78e-08	Pxmp4|Crot|Prdx5|Cat|Abcd3|Scp2|Hmgcl|Acsl1|Gnpat|Acsl5|Slc27a2|Ech1|Pex26|Acnat1|Mlycd|Idh2|Nudt7|Pex1|Acox2|Eci2	803	2608|2767|2464|1876|1999|1138|3346|1699|2821|1465|2716|1861|1444|2476|1420|2923|3244|2101|2692|1639	1.18e-09	mmu04146
92	20	KEGG Pathways		Retinol metabolism	1.82e-07	Aox1|Cyp2c29|Adh1|Cyp2b13|Cyp2a5|Rdh10|Cyp4a14|Ugt2b1|Cyp3a13|Cyp2c38|Cyp2c37|Cyp2c54|Aox3|Cyp2c70|Ugt2b5|Cyp2a12|Cyp2c50|Cyp4a12a|Ugt1a6b|Hsd17b6	803	3070|1969|2053|3226|3304|2365|2260|2806|3409|2080|2734|1951|2212|1684|1903|1750|2869|3088|2653|2695	3.83e-09	mmu00830
99	19	KEGG Pathways		Chemical carcinogenesis	1.62e-06	Cyp2c29|Gstm3|Gstm1|Adh1|Cyp2b13|Gstm2|Cyp2e1|Ugt2b1|Cyp3a13|Gsta2|Cyp2c38|Cyp2c37|Cyp2c54|Cyp2c70|Ugt2b5|Cyp2c50|Ugt1a6b|Gstp1|Gstt2	803	1969|3376|3349|2053|3226|1537|3103|2806|3409|2209|2080|2734|1951|1684|1903|2869|2653|2956|2989	5.37e-08	mmu05204
61	18	KEGG Pathways		Fatty acid metabolism	4.21e-08	Acat2|Fads1|Acadl|Hsd17b12|Scp2|Cpt2|Mecr|Acads|Acsl1|Cbr4|Acaa2|H2-Ke6|Acsl5|Mcat|Acaca|Acadvl|Hadhb|Hadha	803	2446|3217|2143|1891|1138|1135|2059|3343|1699|1879|1825|1090|1465|3202|1117|1963|2422|2893	3.71e-10	mmu01212
86	18	KEGG Pathways		PPAR signaling pathway	1.4e-06	Angptl4|Adipoq|Fabp2|Acadl|Pck1|Fabp5|Scp2|Cpt2|Cyp4a14|Acsl1|Acsl5|Cyp8b1|Slc27a2|Cyp4a12a|Hmgcs2|Apoa5|Acox2|Hmgcs1	803	3019|2746|1021|2143|2272|2404|1138|1135|2260|1699|1465|1801|2716|3088|2302|3388|2692|3418	3.8e-08	mmu03320
87	18	KEGG Pathways		Arachidonic acid metabolism	1.47e-06	Cyp2c29|Cyp4f18|Cyp2b13|Cyp2e1|Cyp2j5|Cyp4a14|Prxl2b|Cyp2c38|Cyp2c37|Cbr3|Cyp2c54|Cyp4f14|Cyp2c70|Cyp4f13|Cyp2c50|Gpx3|Cyp4a12a|Cyp2u1	803	1969|1816|3226|3103|2635|2260|1855|2080|2734|2386|1951|3199|1684|1645|2869|1867|3088|2479	4.43e-08	mmu00590
126	17	KEGG Pathways		Ribosome	0.00029	Mrpl33|Rps3|Rpsa|Mrps2|Mrps9|Rps21|Rpl37a|Rps15|Rpl3|Rps27a|Rpl36al|Mrpl24|Mrpl15|Rpl29|Mrpl17|Mrpl13|Rps12	803	1417|1099|1729|1402|2263|2752|1048|3079|2662|2887|1339|3028|1993|3127|1846|2689|1498	1.89e-05	mmu03010
50	16	KEGG Pathways		Fatty acid degradation	9.78e-08	Adh1|Acat2|Acadl|Cpt2|Cyp4a14|Acads|Acsl1|Acaa2|Acsl5|Aldh7a1|Cyp4a12a|Acadvl|Hadhb|Hadha|Eci2|Eci1	803	2053|2446|2143|1135|2260|3343|1699|1825|1465|1381|3088|1963|2422|2893|1639|1297	1.32e-09	mmu00071
55	15	KEGG Pathways		Valine, leucine and isoleucine degradation	1.1e-06	Dbt|Aox1|Acat2|Mccc2|Hmgcl|Aacs|Acads|Hibadh|Acaa2|Aox3|Aldh7a1|Hmgcs2|Hadhb|Hadha|Hmgcs1	803	1495|3070|2446|1561|3346|997|3343|2308|1825|2212|1381|2302|2422|2893|3418	2.64e-08	mmu00280
70	15	KEGG Pathways		Drug metabolism - cytochrome P450	1.01e-05	Aox1|Gstm3|Gstm1|Adh1|Gstm2|Cyp2e1|Ugt2b1|Gsta2|Fmo1|Aox3|Ugt2b5|Fmo5|Ugt1a6b|Gstp1|Gstt2	803	3070|3376|3349|2053|1537|3103|2806|2209|3247|2212|1903|2044|2653|2956|2989	3.96e-07	mmu00982
90	15	KEGG Pathways		Drug metabolism - other enzymes	0.00011	Gstm3|Gstm1|Gstm2|Tpmt|Tymp|Cyp2e1|Gusb|Ugt2b1|Ces1c|Ces2e|Gsta2|Ugt2b5|Ugt1a6b|Gstp1|Gstt2	803	3376|3349|1537|1942|3100|3103|2713|2806|3133|1480|2209|1903|2653|2956|2989	6.23e-06	mmu00983
128	15	KEGG Pathways		Lysosome	0.0024	Neu1|Hexb|Naga|Igf2r|Hexa|Gusb|Ctsc|Man2b1|Lipa|Glb1|Arsb|Ap1g1|M6pr|Ctsd|Psap	803	2410|2983|3271|2863|1996|2713|994|1549|1189|1987|2182|2023|1210|3295|1471	0.00024	mmu04142
131	15	KEGG Pathways		Spliceosome	0.0027	Hspa1l|Prpf31|Snrpd3|Rbm22|Lsm4|Rp9|Dhx8|Hnrnpa1|Srsf7|Prpf38a|Hspa1a|Snu13|Hnrnpa3|Srsf3|Hspa1b	803	2443|3460|1285|2812|1312|1219|3232|3394|2722|2374|2095|2506|1267|2497|2914	0.0003	mmu03040
72	14	KEGG Pathways		Metabolism of xenobiotics by cytochrome P450	5.45e-05	Cyp2f2|Gstm3|Gstm1|Adh1|Gstm2|Cyp2e1|Ugt2b1|Gsta2|Cbr3|Ugt2b5|Akr7a5|Ugt1a6b|Gstp1|Gstt2	803	1924|3376|3349|2053|1537|3103|2806|2209|2386|1903|2119|2653|2956|2989	2.63e-06	mmu00980
77	14	KEGG Pathways		Biosynthesis of amino acids	9.64e-05	Pfkl|Aco2|Acy1|Idh3b|Tha1|Mat2b|Pycrl|Otc|Pcx|Phgdh|Aldoart1|Idh2|Cth|Idh3a	803	2110|2764|1810|2032|1366|1864|1510|2977|1888|2194|1006|2923|3310|2581	5.23e-06	mmu01230
91	14	KEGG Pathways		Complement and coagulation cascades	0.00037	Clu|C9|Pros1|C4bp|C8b|F9|Fgb|C1qa|Cfd|Serpina1c|Cr1l|Cfh|Fga|Fgg	803	2221|1039|1168|3139|1108|1351|3400|2563|2344|2152|2566|2926|2242|2785	2.8e-05	mmu04610
71	13	KEGG Pathways		Glutathione metabolism	0.00017	Gstm3|Gstm1|G6pdx|Gstm2|Gclm|Nat8|Gsta2|Nat8f2|Gss|Gpx3|Idh2|Gstp1|Gstt2	803	3376|3349|3109|1537|1966|1741|2209|1390|2485|1867|2923|2956|2989	1.06e-05	mmu00480
127	13	KEGG Pathways		Serotonergic synapse	0.0124	Cyp2c29|Cyp2d26|Cyp2d22|Cyp2j5|Gnb2|Cyp2c38|Cyp2c37|Gng12|Cyp2c54|Cyp2c70|Prkca|Cyp2d10|Cyp2c50	803	1969|1288|3262|2635|3163|2080|2734|1612|1951|1684|1177|1648|2869	0.0019	mmu04726
130	13	KEGG Pathways		Oxidative phosphorylation	0.0142	Ndufa1|Ppa1|Uqcr11|Ndufa6|Atp5o|Uqcrc1|Ndufc2|Uqcrc2|Uqcr10|Sdhc|Atp5pb|Ndufa12|Ndufs8	803	3157|2572|1396|3265|1369|1555|2371|1783|3436|3037|3016|1228|1150	0.0023	mmu00190
142	13	KEGG Pathways		Fluid shear stress and atherosclerosis	0.0255	Nqo1|Gstm3|Gstm1|Ctnnb1|Rhoa|Gstm2|Cyba|Hsp90ab1|Gsta2|Actg1|Sqstm1|Gstp1|Gstt2	803	2647|3376|3349|1204|1882|1537|3091|1378|2209|1738|2086|2956|2989	0.0045	mmu05418
32	11	KEGG Pathways		Citrate cycle (TCA cycle)	7.8e-06	Pdhb|Aco2|Idh3b|Pck1|Pcx|Ogdh|Idh2|Sdhc|Sucla2|Idh3a|Suclg2	803	2758|2764|2032|2272|1888|1939|2923|3037|2128|2581|1774	2.82e-07	mmu00020
118	11	KEGG Pathways		Inflammatory mediator regulation of TRP channels	0.0418	Cyp2c29|Map2k3|Cyp2j5|Cyp4a14|Cyp2c38|Cyp2c37|Cyp2c54|Cyp2c70|Prkca|Cyp2c50|Cyp4a12a	803	1969|2803|2635|2260|2080|2734|1951|1684|1177|2869|3088	0.0077	mmu04750
28	10	KEGG Pathways		Butanoate metabolism	1.75e-05	Acat2|Hmgcl|Aacs|Acads|Acsm1|Aldh5a1|Hmgcs2|Bdh1|Hadha|Hmgcs1	803	2446|3346|997|3343|2998|2116|2302|2542|2893|3418	7.4e-07	mmu00650
38	10	KEGG Pathways		Glycine, serine and threonine metabolism	0.00012	Gcat|Tha1|Amt|Bpgm|Glyctk|Phgdh|Aldh7a1|Chdh|Bhmt|Cth	803	3259|1366|2986|1807|2815|2194|1381|2383|2560|3310	7.35e-06	mmu00260
51	10	KEGG Pathways		Tryptophan metabolism	0.00081	Haao|Aox1|Inmt|Acat2|Cat|Tdo2|Aox3|Aldh7a1|Aadat|Hadha	803	2641|3070|1843|2446|1876|3178|2212|1381|2314|2893	6.61e-05	mmu00380
34	9	KEGG Pathways		Propanoate metabolism	0.00029	Dbt|Acat2|Acads|Mlycd|Acaca|Acacb|Hadha|Sucla2|Suclg2	803	1495|2446|3343|1420|1117|2071|2893|2128|1774	2.03e-05	mmu00640
48	9	KEGG Pathways		Linoleic acid metabolism	0.0021	Cyp2c29|Cyp2e1|Cyp2j5|Cyp3a13|Cyp2c38|Cyp2c37|Cyp2c54|Cyp2c70|Cyp2c50	803	1969|3103|2635|3409|2080|2734|1951|1684|2869	0.0002	mmu00591
71	9	KEGG Pathways		Bacterial invasion of epithelial cells	0.0154	Ctnnb1|Rhoa|Vcl|Actg1|Dock1|Sept8|Arpc4|Ctnna2|Bcar1	803	1204|1882|1630|1738|1588|2995|2230|1321|3046	0.0025	mmu05100
18	8	KEGG Pathways		Fatty acid biosynthesis	5.45e-05	Mecr|Acsl1|Cbr4|H2-Ke6|Acsl5|Mcat|Acaca|Acacb	803	2059|1699|1879|1090|1465|3202|1117|2071	2.64e-06	mmu00061
29	8	KEGG Pathways		Fatty acid elongation	0.00058	Acot3|Hsd17b12|Mecr|Acaa2|Them4|Hadhb|Hadha|Acot1	803	1081|1891|2059|1825|3067|2422|2893|2626	4.58e-05	mmu00062
40	8	KEGG Pathways		Various types of N-glycan biosynthesis	0.0027	Hexb|Hexa|B4galt1|St3gal3|Stt3b|Alg2|Mgat2|Stt3a	803	2983|1996|1072|2533|2908|2434|3370|1936	0.00031	mmu00513
40	8	KEGG Pathways		Nicotinate and nicotinamide metabolism	0.0027	Aox1|Naprt|Qprt|Nnmt|Pnp|Aox3|Sirt2|Nmnat3	803	3070|1558|2026|3367|3316|2212|2611|2548	0.00031	mmu00760
41	8	KEGG Pathways		Porphyrin and chlorophyll metabolism	0.003	Gusb|Ugt2b1|Uros|Eprs|Ugt2b5|Ppox|Ugt1a6b|Fech	803	2713|2806|1543|1042|1903|1429|2653|2266	0.00036	mmu00860
44	8	KEGG Pathways		Aminoacyl-tRNA biosynthesis	0.0045	Qrsl1|Tars|Aars2|Dars2|Eprs|Cars2|Pars2|Iars	803	2614|2338|1423|1792|1042|2728|2932|2488	0.00055	mmu00970
34	7	KEGG Pathways		Pentose and glucuronate interconversions	0.0049	Cryl1|Dcxr|Gusb|Ugt2b1|Ugt2b5|Akr1b3|Ugt1a6b	803	1240|3214|2713|2806|1903|1915|2653	0.00064	mmu00040
39	7	KEGG Pathways		Pyruvate metabolism	0.0092	Acat2|Pdhb|Pck1|Pcx|Aldh7a1|Acaca|Acacb	803	2446|2758|2272|1888|1381|1117|2071	0.0013	mmu00620
40	7	KEGG Pathways		Ferroptosis	0.0102	Gclm|Acsl1|Acsl5|Gss|Ftl1|Ncoa4|Fth1	803	1966|1699|1465|2485|3004|3025|1018	0.0015	mmu04216
50	7	KEGG Pathways		Cysteine and methionine metabolism	0.0255	Gclm|Mpst|Mat2b|Phgdh|Gss|Bhmt|Cth	803	1966|1528|1864|2194|2485|2560|3310	0.0045	mmu00270
20	6	KEGG Pathways		Steroid biosynthesis	0.0027	Tm7sf2|Hsd17b7|Ebp|Dhcr24|Lipa|Fdft1	803	2677|1672|2233|1156|1189|3064	0.00029	mmu00100
20	6	KEGG Pathways		2-Oxocarboxylic acid metabolism	0.0027	Aco2|Acy1|Idh3b|Aadat|Idh2|Idh3a	803	2764|1810|2032|2314|2923|2581	0.00029	mmu01210
27	6	KEGG Pathways		Ascorbate and aldarate metabolism	0.0083	Rgn|Ugt2b1|Gulo|Aldh7a1|Ugt2b5|Ugt1a6b	803	1075|2806|2329|1381|1903|2653	0.0011	mmu00053
31	6	KEGG Pathways		Glyoxylate and dicarboxylate metabolism	0.0133	Acat2|Aco2|Cat|Amt|Glyctk|Pgp	803	2446|2764|1876|2986|2815|3010	0.002	mmu00630
33	6	KEGG Pathways		Pentose phosphate pathway	0.0163	G6pdx|Pfkl|Rgn|Pgls|Glyctk|Aldoart1	803	3109|2110|1075|1786|2815|1006	0.0027	mmu00030
34	6	KEGG Pathways		Biosynthesis of unsaturated fatty acids	0.0183	Fads1|Acot3|Hsd17b12|Scp2|Acnat1|Acot1	803	3217|1081|1891|1138|2476|2626	0.0031	mmu01040
11	5	KEGG Pathways		Sulfur metabolism	0.0021	Papss1|Mpst|Ethe1|Selenbp1|Selenbp2	803	3415|1528|2407|988|1132	0.0002	mmu00920
12	5	KEGG Pathways		Synthesis and degradation of ketone bodies	0.0027	Acat2|Hmgcl|Hmgcs2|Bdh1|Hmgcs1	803	2446|3346|2302|2542|3418	0.00027	mmu00072
18	5	KEGG Pathways		Primary bile acid biosynthesis	0.0092	Scp2|Cyp7b1|Cyp8b1|Acnat1|Acox2	803	1138|3292|1801|2476|2692	0.0012	mmu00120
18	5	KEGG Pathways		Other glycan degradation	0.0092	Neu1|Hexb|Hexa|Man2b1|Glb1	803	2410|2983|1996|1549|1987	0.0012	mmu00511
21	5	KEGG Pathways		Glycosaminoglycan degradation	0.0142	Hexb|Hexa|Gusb|Glb1|Arsb	803	2983|1996|2713|1987|2182	0.0022	mmu00531
11	4	KEGG Pathways		Ubiquinone and other terpenoid-quinone biosynthesis	0.0118	Nqo1|Coq3|Coq5|Coq6	803	2647|1714|1795|2173	0.0017	mmu00130
15	4	KEGG Pathways		Glycosphingolipid biosynthesis - ganglio series	0.0252	B4galnt1|Hexb|Hexa|Glb1	803	2905|2983|1996|1987	0.0044	mmu00604

## Sheet: Muscle_KEGG
Category	Term	Count	%	PValue	Genes	List Total	Pop Hits	Pop Total	Fold Enrichment	Bonferroni	Benjamini	FDR
KEGG_PATHWAY	mmu05415:Diabetic cardiomyopathy	21	13.5484	1.61742e-14	Q9CQ69, Q9CR68, Q60932, Q8K3J1, Q99KR7, P11103, Q7TMF3, P19783, O70571, Q9JLN9, Q9D023, Q9CXZ1, P19536, Q9CZB0, P48962, P56391, Q3UIU2, Q9DB77, Q91VR2, Q91YT0, Q9DB20	96	212	9463	9.7643	3.30669e-12	3.29954e-12	2.99223e-12
KEGG_PATHWAY	mmu01200:Carbon metabolism	17	10.9677	4.40198e-14	Q9D6R2, P06801, Q8VC30, Q9DCD0, O08749, P70695, Q93092, Q8CAY6, Q91VA7, P97807, Q05920, P40142, Q9CZB0, P17182, Q9QXG4, P05201	96	121	9463	13.8491	8.96883e-12	4.49002e-12	4.07183e-12
KEGG_PATHWAY	mmu01100:Metabolic pathways	48	30.9677	3.67384e-13	Q9CQ69, Q9CR68, Q8R1G2, P50171, P19096, Q8K3J1, Q9DCD0, O08749, Q7TMF3, Q6P8J7, Q93092, Q9Z1J3, Q9Z2L6, Q8CAY6, Q91VA7, P97807, Q9CZN8, Q05920, Q8K2C9, P40142, Q91V92, Q9CZB0, Q3THS6, Q8BJ56, Q9DB77, Q91VR2, Q9ERL9, Q91YT0, Q9D6R2, P06801, Q8VC30, Q5SWU9, P70695, P19783, Q9JHI5, Q9CXZ1, P19536, P46978, Q68FL6, O55229, O09172, P17182, Q9QXG4, P56391, Q3UIU2, P05201, Q9DB20	96	1625	9463	2.91169	7.49441e-11	2.49821e-11	2.26553e-11
KEGG_PATHWAY	mmu05020:Prion disease	21	13.5484	1.3877e-12	Q9CQ69, Q9CR68, Q60932, Q8K3J1, Q99KR7, Q7TMF3, P19783, Q9CXZ1, Q01097, P19536, Q99JI4, Q9CZB0, P62196, Q60737, P48962, P56391, Q3UIU2, Q9DB77, Q91VR2, Q91YT0, Q9DB20	96	268	9463	7.724	2.83084e-10	7.07728e-11	6.41812e-11
KEGG_PATHWAY	mmu05012:Parkinson disease	20	12.9032	1.18101e-11	Q9CQ69, Q9CR68, Q6R0H7, Q60932, Q8K3J1, Q99KR7, Q7TMF3, P19783, Q9CXZ1, P19536, Q99JI4, Q9CZB0, P62196, P48962, P56391, Q3UIU2, Q9DB77, Q91VR2, Q91YT0, Q9DB20	96	266	9463	7.4115	2.40926e-09	4.56278e-10	4.13782e-10
KEGG_PATHWAY	mmu05016:Huntington disease	21	13.5484	1.34199e-11	Q9CQ69, Q9CR68, Q60932, Q8K3J1, Q99KR7, Q7TMF3, P19783, Q9JLN9, Q9CXZ1, Q01097, P19536, Q99JI4, Q9CZB0, P62196, P48962, P56391, Q3UIU2, Q9DB77, Q91VR2, Q91YT0, Q9DB20	96	303	9463	6.83179	2.73767e-09	4.56278e-10	4.13782e-10
KEGG_PATHWAY	mmu05010:Alzheimer disease	22	14.1935	1.3369e-10	Q9CQ69, Q9CR68, Q60932, Q8K3J1, Q99KR7, Q7TMF3, P19783, Q9JLN9, Q9CXZ1, Q01097, P19536, Q99JI4, Q9CZB0, P62196, Q60737, P48962, P56391, Q3UIU2, Q9DB77, Q91VR2, Q91YT0, Q9DB20	96	384	9463	5.64741	2.72727e-08	3.8961e-09	3.53323e-09
KEGG_PATHWAY	mmu05208:Chemical carcinogenesis - reactive oxygen species	17	10.9677	5.99225e-10	Q9CQ69, Q9CR68, Q60932, Q8K3J1, Q99KR7, Q7TMF3, P19783, Q9CXZ1, P19536, Q9CZB0, P48962, P56391, Q3UIU2, Q9DB77, Q91VR2, Q91YT0, Q9DB20	96	224	9463	7.48098	1.22242e-07	1.52802e-08	1.38571e-08
KEGG_PATHWAY	mmu00190:Oxidative phosphorylation	14	9.03226	8.00392e-10	Q9CQ69, Q9CR68, Q8K3J1, Q7TMF3, P19783, Q9CXZ1, P19536, Q9CZB0, P56391, Q3UIU2, Q9DB77, Q91VR2, Q91YT0, Q9DB20	96	136	9463	10.1472	1.6328e-07	1.81422e-08	1.64525e-08
KEGG_PATHWAY	mmu05022:Pathways of neurodegeneration - multiple diseases	23	14.8387	9.99333e-10	Q9CQ69, Q9CR68, Q60932, Q8K3J1, Q99KR7, Q7TMF3, P19783, Q9JLN9, P70236, Q9CXZ1, Q01097, P19536, Q99JI4, Q9CZB0, P62196, Q60737, P48962, P56391, Q3UIU2, Q9DB77, Q91VR2, Q91YT0, Q9DB20	96	473	9463	4.79319	2.03864e-07	1.86299e-08	1.68948e-08
KEGG_PATHWAY	mmu04714:Thermogenesis	17	10.9677	1.00455e-09	Q9CQ69, Q9CR68, Q6R0H7, Q8K3J1, Q7TMF3, P19783, Q9JLN9, Q9CXZ1, P19536, Q9CZB0, Q8BJ56, P56391, Q3UIU2, Q9DB77, Q91VR2, Q91YT0, Q9DB20	96	232	9463	7.22302	2.04929e-07	1.86299e-08	1.68948e-08
KEGG_PATHWAY	mmu05014:Amyotrophic lateral sclerosis	20	12.9032	3.32734e-09	Q9CQ69, Q9CR68, Q60932, Q8K3J1, Q7TMF3, P19783, Q9JLN9, P70236, Q9CXZ1, Q01097, P19536, Q99JI4, Q9CZB0, P62196, P56391, Q3UIU2, Q9DB77, Q91VR2, Q91YT0, Q9DB20	96	370	9463	5.32827	6.78777e-07	5.65647e-08	5.12964e-08
KEGG_PATHWAY	mmu04932:Non-alcoholic fatty liver disease	12	7.74194	4.34495e-07	P19536, Q9CQ69, Q9CR68, Q9CZB0, Q8K3J1, P19783, Q7TMF3, P56391, Q3UIU2, Q9DB77, Q9CXZ1, Q91YT0	96	157	9463	7.53424	8.8633e-05	6.81822e-06	6.18319e-06
KEGG_PATHWAY	mmu00020:Citrate cycle (TCA cycle)	7	4.51613	6.40883e-07	Q91VA7, P97807, Q9D6R2, Q05920, Q91V92, Q9CZB0, O08749	96	32	9463	21.5628	0.000130732	9.33858e-06	8.46881e-06
KEGG_PATHWAY	mmu01230:Biosynthesis of amino acids	9	5.80645	1.11341e-06	Q91VA7, Q9D6R2, Q05920, P40142, Q3THS6, P17182, Q93092, P05201	96	79	9463	11.2298	0.00022711	1.51424e-05	1.37321e-05
KEGG_PATHWAY	mmu00620:Pyruvate metabolism	7	4.51613	4.53111e-06	P97807, P06801, Q05920, Q5SWU9, O08749, Q9QXG4, Q8CAY6	96	44	9463	15.6821	0.000923922	5.77717e-05	5.2391e-05
KEGG_PATHWAY	mmu04260:Cardiac muscle contraction	7	4.51613	0.000229226	P19536, Q9CQ69, Q9CR68, P19783, P56391, Q9DB77, G5E8J6	96	87	9463	7.93115	0.0456906	0.00275071	0.00249451
KEGG_PATHWAY	mmu00010:Glycolysis / Gluconeogenesis	6	3.87097	0.000541933	O08749, P70695, P17182, Q9QXG4, Q9Z2L6	96	67	9463	8.82743	0.104689	0.00614191	0.00556987
KEGG_PATHWAY	mmu05017:Spinocerebellar ataxia	7	4.51613	0.0028852	Q99JI4, Q60932, P62196, Q99KR7, P48962, Q9JLN9, Q01097	96	141	9463	4.89369	0.445357	0.0309779	0.0280927
KEGG_PATHWAY	mmu01212:Fatty acid metabolism	5	3.22581	0.00340849	Q8K2C9, P50171, P19096, Q5SWU9, Q8CAY6	96	62	9463	7.94943	0.501683	0.0347666	0.0315285
KEGG_PATHWAY	mmu00030:Pentose phosphate pathway	4	2.58065	0.00468204	P40142, Q9DCD0, P70695, Q93092	96	34	9463	11.5968	0.616102	0.0434153	0.0393717
KEGG_PATHWAY	mmu01210:2-Oxocarboxylic acid metabolism	4	2.58065	0.00468204	Q91VA7, Q9D6R2, O08749, P05201	96	34	9463	11.5968	0.616102	0.0434153	0.0393717
KEGG_PATHWAY	mmu00061:Fatty acid biosynthesis	3	1.93548	0.0152611	P50171, P19096, Q5SWU9	96	19	9463	15.5641	0.956599	0.13536	0.122753
KEGG_PATHWAY	mmu04141:Protein processing in endoplasmic reticulum	6	3.87097	0.0286105	P46978, Q01405, Q3TZ89, Q9CQC9, Q62186, Q78XF5	96	171	9463	3.4587	0.997319	0.243189	0.220539
KEGG_PATHWAY	mmu00640:Propanoate metabolism	3	1.93548	0.0384032	Q5SWU9, O08749, Q9QXG4	96	31	9463	9.53931	0.999661	0.31337	0.284184
KEGG_PATHWAY	mmu00630:Glyoxylate and dicarboxylate metabolism	3	1.93548	0.0407009	O08749, Q9QXG4, Q8CAY6	96	32	9463	9.24121	0.999792	0.314237	0.28497
KEGG_PATHWAY	mmu04020:Calcium signaling pathway	7	4.51613	0.0415902	Q6R0H7, Q60932, Q99KR7, P48962, P70302, G5E8J6, Q01097	96	253	9463	2.72731	0.999828	0.314237	0.28497
KEGG_PATHWAY	mmu04723:Retrograde endocannabinoid signaling	5	3.22581	0.0626756	Q8K3J1, Q7TMF3, Q3UIU2, Q9CXZ1, Q91YT0	96	149	9463	3.30782	0.999998	0.456637	0.414107

## Sheet: Muscle_STRING_PPI
# background genes	# genes	category	chart color	description	FDR value	genes	network.SUID	nodes.SUID	p-value	term name
1534	46	KEGG Pathways		Metabolic pathways	6.71e-15	Acat2|Qrsl1|Fbp2|Ckmt2|Ndufs4|Tkt|Chkb|Atp5po|Minpp1|Got1|Taldo1|Fh|Ivd|Idh3b|Acss2|Nfs1|Gclm|Uqcrc2|Me1|Hsd17b8|Cox5b|Ndufv1|Hacd3|Uqcrfs1|Fasn|Uqcrq|Pc|Cmbl|Cox6b1|Eno1|Pgd|Mat2a|Acaca|Acly|Dld|Sdhc|Atp5f1c|Stt3a|Pnpla2|Idh3a|Mars1|Ndufa12|Cox4i1|Gucy1a1|Tkfc|Ndufs8	66625	67119|66930|66936|67245|67020|67218|67191|66894|66909|66963|67071|67254|67098|66957|66873|67182|66834|67032|67230|66927|67050|66993|67143|66858|67026|67113|67200|66918|66900|67104|66852|67185|66966|66864|66975|67086|67128|67257|66996|66867|66984|67146|66906|66954|67077|67029	2.02e-17	mmu01100
263	21	KEGG Pathways		Prion disease	1.3e-13	Psmc5|Psmd6|Ndufs4|Ppif|Atp5o|Uqcrc2|Slc25a4|Gm11273|Ndufv1|Uqcrfs1|Uqcrq|Grin2b|Cox6b1|Ndufb6|Csnk2a1|Vdac1|Sdhc|Atp5c1|Ndufa12|Cox4i1|Ndufs8	66625	67044|67080|67020|67047|66894|67032|66876|67050|66993|66858|67113|67089|66900|66924|66945|66912|67086|67128|67146|66906|67029	7.81e-16	mmu05020
122	16	KEGG Pathways		Carbon metabolism	2.43e-13	Acat2|Fbp2|Tkt|Got1|Taldo1|Fh1|Idh3b|Acss2|Me1|Pcx|Eno1b|Pgd|Dld|Sdhc|Idh3a|Tkfc	66625	67119|66936|67218|66963|67071|67254|66957|66873|67230|67200|67104|66852|66975|67086|66867|67077	2.19e-15	mmu01200
297	21	KEGG Pathways		Huntington disease	6.21e-13	Psmc5|Psmd6|Ndufs4|Ppif|Atp5o|Uqcrc2|Slc25a4|Gm11273|Ndufv1|Uqcrfs1|Uqcrq|Grin2b|Cox6b1|Ndufb6|Mtor|Vdac1|Sdhc|Atp5c1|Ndufa12|Cox4i1|Ndufs8	66625	67044|67080|67020|67047|66894|67032|66876|67050|66993|66858|67113|67089|66900|66924|66837|66912|67086|67128|67146|66906|67029	7.49e-15	mmu05016
238	19	KEGG Pathways		Parkinson disease	1.35e-12	Psmc5|Psmd6|Ndufs4|Ppif|Atp5o|Uqcrc2|Slc25a4|Gm11273|Ndufv1|Uqcrfs1|Uqcrq|Cox6b1|Ndufb6|Vdac1|Sdhc|Atp5c1|Ndufa12|Cox4i1|Ndufs8	66625	67044|67080|67020|67047|66894|67032|66876|67050|66993|66858|67113|66900|66924|66912|67086|67128|67146|66906|67029	2.03e-14	mmu05012
360	22	KEGG Pathways		Alzheimer disease	1.51e-12	Psmc5|Psmd6|Ndufs4|Ppif|Atp5o|Uqcrc2|Slc25a4|Gm11273|Ndufv1|Uqcrfs1|Uqcrq|Grin2b|Cox6b1|Ndufb6|Csnk2a1|Mtor|Vdac1|Sdhc|Atp5c1|Ndufa12|Cox4i1|Ndufs8	66625	67044|67080|67020|67047|66894|67032|66876|67050|66993|66858|67113|67089|66900|66924|66945|66837|66912|67086|67128|67146|66906|67029	2.73e-14	mmu05010
130	14	KEGG Pathways		Oxidative phosphorylation	7.31e-11	Ndufs4|Atp5o|Uqcrc2|Gm11273|Ndufv1|Uqcrfs1|Uqcrq|Cox6b1|Ndufb6|Sdhc|Atp5c1|Ndufa12|Cox4i1|Ndufs8	66625	67020|66894|67032|67050|66993|66858|67113|66900|66924|67086|67128|67146|66906|67029	1.54e-12	mmu00190
362	20	KEGG Pathways		Amyotrophic lateral sclerosis	1.07e-10	Map2k6|Psmc5|Psmd6|Ndufs4|Atp5o|Uqcrc2|Gm11273|Ndufv1|Uqcrfs1|Uqcrq|Grin2b|Cox6b1|Ndufb6|Mtor|Vdac1|Sdhc|Atp5c1|Ndufa12|Cox4i1|Ndufs8	66625	67035|67044|67080|67020|66894|67032|67050|66993|66858|67113|67089|66900|66924|66837|66912|67086|67128|67146|66906|67029	2.57e-12	mmu05014
225	16	KEGG Pathways		Thermogenesis	4.89e-10	Ndufs4|Atp5o|Uqcrc2|Gm11273|Ndufv1|Uqcrfs1|Uqcrq|Cox6b1|Ndufb6|Mtor|Sdhc|Atp5c1|Pnpla2|Ndufa12|Cox4i1|Ndufs8	66625	67020|66894|67032|67050|66993|66858|67113|66900|66924|66837|67086|67128|66996|67146|66906|67029	1.33e-11	mmu04714
147	12	KEGG Pathways		Non-alcoholic fatty liver disease	4.09e-08	Ndufs4|Uqcrc2|Gm11273|Ndufv1|Uqcrfs1|Uqcrq|Cox6b1|Ndufb6|Sdhc|Ndufa12|Cox4i1|Ndufs8	66625	67020|67032|67050|66993|66858|67113|66900|66924|67086|67146|66906|67029	1.23e-09	mmu04932
32	7	KEGG Pathways		Citrate cycle (TCA cycle)	2.65e-07	Fh1|Idh3b|Pcx|Acly|Dld|Sdhc|Idh3a	66625	67254|66957|67200|66864|66975|67086|66867	8.77e-09	mmu00020
39	7	KEGG Pathways		Pyruvate metabolism	8.1e-07	Acat2|Fh1|Acss2|Me1|Pcx|Acaca|Dld	66625	67119|67254|66873|67230|67200|66966|66975	2.93e-08	mmu00620
77	8	KEGG Pathways		Biosynthesis of amino acids	3.57e-06	Tkt|Got1|Taldo1|Idh3b|Pcx|Eno1b|Mat2a|Idh3a	66625	67218|66963|67071|66957|67200|67104|67185|66867	1.4e-07	mmu01230
84	7	KEGG Pathways		Cardiac muscle contraction	8.09e-05	Uqcrc2|Gm11273|Uqcrfs1|Uqcrq|Cox6b1|Hrc|Cox4i1	66625	67032|67050|66858|67113|66900|67233|66906	3.41e-06	mmu04260
140	7	KEGG Pathways		Spinocerebellar ataxia	0.0017	Psmc5|Psmd6|Ppif|Slc25a4|Grin2b|Mtor|Vdac1	66625	67044|67080|67047|66876|67089|66837|66912	7.76e-05	mmu05017
61	5	KEGG Pathways		Fatty acid metabolism	0.002	Acat2|H2-Ke6|Hacd3|Fasn|Acaca	66625	67119|66927|67143|67026|66966	9.69e-05	mmu01212
65	5	KEGG Pathways		Glycolysis / Gluconeogenesis	0.0024	Fbp2|Minpp1|Acss2|Eno1b|Dld	66625	66936|66909|66873|67104|66975	0.00013	mmu00010
33	4	KEGG Pathways		Pentose phosphate pathway	0.0024	Fbp2|Tkt|Taldo1|Pgd	66625	66936|67218|67071|66852	0.00012	mmu00030
34	4	KEGG Pathways		Propanoate metabolism	0.0024	Acat2|Acss2|Acaca|Dld	66625	67119|66873|66966|66975	0.00014	mmu00640
18	3	KEGG Pathways		Fatty acid biosynthesis	0.0066	H2-Ke6|Fasn|Acaca	66625	66927|67026|66966	0.0004	mmu00061
20	3	KEGG Pathways		2-Oxocarboxylic acid metabolism	0.0083	Got1|Idh3b|Idh3a	66625	66963|66957|66867	0.00053	mmu01210
31	3	KEGG Pathways		Glyoxylate and dicarboxylate metabolism	0.0255	Acat2|Acss2|Dld	66625	67119|66873|66975	0.0017	mmu00630

## Sheet: Cortex_KEGG
Category	Term	Count	%	PValue	Genes	List Total	Pop Hits	Pop Total	Fold Enrichment	Bonferroni	Benjamini	FDR
KEGG_PATHWAY	mmu04140:Autophagy - animal	10	2.55102	0.00743112	Q8VD65, Q3UMB5, P55258, Q99KU0, Q60823, P31938, Q5EG47, Q8K296, P11881, Q9ERB0	196	166	9463	2.90847	0.88066	0.809285	0.809285
KEGG_PATHWAY	mmu01100:Metabolic pathways	48	12.2449	0.00800743	Q8BGT5, Q9QZA0, B2RXC2, Q8BYI6, Q9CZS1, P48771, Q922H4, Q8CC86, Q9CQU0, Q9EP69, P13864, Q9CQ60, Q8C0M9, Q6P8J7, Q9CRY7, Q9WUP4, Q8JZL3, Q9CZL5, Q8K2C9, Q8CFA2, Q920P5, Q91Z92, Q6XPS7, O88455, Q8K296, Q8K4X7, O70423, Q64516, Q9D517, Q61206, P40936, Q9D273, Q3V1L4, P54869, Q9JHI5, Q91WC3, Q91WG7, Q99J77, P19536, P46978, Q9CQ91, Q8BVU5, P17182, P00158, P98191, O89112, Q9Z1X2	196	1625	9463	1.42614	0.898866	0.809285	0.809285
KEGG_PATHWAY	mmu03013:Nucleocytoplasmic transport	8	2.04082	0.0104515	E9Q3G8, Q99LG2, Q9ERK4, Q9EPK7, Q8K0C1, Q8C570, Q99JX7, Q8BKC5	196	117	9463	3.30124	0.949931	0.809285	0.809285
KEGG_PATHWAY	mmu04610:Complement and coagulation cascades	7	1.78571	0.0128951	Q00898, Q00897, Q00896, Q8VCM7, P97290, P01027, P22599	196	94	9463	3.59536	0.975252	0.809285	0.809285
KEGG_PATHWAY	mmu04070:Phosphatidylinositol signaling system	7	1.78571	0.014198	P68404, B2RXC2, Q9EP69, P98191, Q8K296, P11881, Q91WG7	196	96	9463	3.52046	0.983015	0.809285	0.809285
KEGG_PATHWAY	mmu04144:Endocytosis	12	3.06122	0.0227258	P84084, P55258, Q8C2E7, Q6P1I6, O08585, P01901, Q8R1X6, Q9CPW4, P60766, P61205, Q80U87	196	268	9463	2.16182	0.998572	1	1
KEGG_PATHWAY	mmu04370:VEGF signaling pathway	5	1.27551	0.0312707	P68404, Q60823, P31938, Q8BMC3, P60766	196	58	9463	4.16212	0.999883	1	1
KEGG_PATHWAY	mmu05022:Pathways of neurodegeneration - multiple diseases	17	4.33673	0.0349162	P51881, Q8VD65, Q3UMB5, P55258, Q9WU84, P48771, O35350, P11881, Q9QY42, P19536, P68404, Q9CQ91, O55234, P31938, P00158, Q9CZR3, E9Q401	196	473	9463	1.73524	0.99996	1	1
KEGG_PATHWAY	mmu03320:PPAR signaling pathway	6	1.53061	0.0364668	O88492, Q64516, P54869, P28704, Q91VE0, Q91WC3	196	89	9463	3.25487	0.999975	1	1
KEGG_PATHWAY	mmu00561:Glycerolipid metabolism	5	1.27551	0.0405955	Q64516, Q9D517, Q9CZS1, Q91WG7, Q8K4X7	196	63	9463	3.83179	0.999993	1	1
KEGG_PATHWAY	mmu04714:Thermogenesis	10	2.55102	0.0500479	P19536, Q6ZPY7, P54310, Q9CQ91, P48771, Q6ZQ88, Q5EG47, P00158, P47746, Q91WC3	196	232	9463	2.08106	1	1	1
KEGG_PATHWAY	mmu05211:Renal cell carcinoma	5	1.27551	0.051336	Q3ULB5, Q60823, P31938, P83940, P60766	196	68	9463	3.55005	1	1	1
KEGG_PATHWAY	mmu00564:Glycerophospholipid metabolism	6	1.53061	0.0515893	Q9D517, Q8BYI6, P98191, Q9Z1X2, Q91WG7, Q8K4X7	196	98	9463	2.95596	1	1	1
KEGG_PATHWAY	mmu04510:Focal adhesion	9	2.29592	0.0587777	P68404, Q3ULB5, P43406, P35441, Q60823, P31938, P11276, Q8BMC3, P60766	196	203	9463	2.14052	1	1	1
KEGG_PATHWAY	mmu04371:Apelin signaling pathway	7	1.78571	0.0637289	Q8VD65, P54310, Q60823, P31938, Q5EG47, P11881, E9Q401	196	137	9463	2.46689	1	1	1
KEGG_PATHWAY	mmu05164:Influenza A	8	2.04082	0.0671009	P51881, P68404, Q60823, Q60803, P31938, Q9WVL2, Q8C570, Q99JX7	196	173	9463	2.23263	1	1	1
KEGG_PATHWAY	mmu04910:Insulin signaling pathway	7	1.78571	0.0673807	P18826, P54310, Q60823, Q9DB30, P31938, Q5EG47, Q8BMC3	196	139	9463	2.4314	1	1	1
KEGG_PATHWAY	mmu05415:Diabetic cardiomyopathy	9	2.29592	0.0710445	P19536, P51881, P68404, Q9CQ91, Q60823, P48771, P00158, Q9D023, E9Q401	196	212	9463	2.04965	1	1	1
KEGG_PATHWAY	mmu05100:Bacterial invasion of epithelial cells	5	1.27551	0.0714307	O08585, Q9CPW4, P11276, Q8BMC3, P60766	196	76	9463	3.17636	1	1	1
KEGG_PATHWAY	mmu05014:Amyotrophic lateral sclerosis	13	3.31633	0.0804139	E9Q3G8, Q8VD65, Q3UMB5, P55258, Q9WU84, P48771, Q99JX7, P19536, Q9CQ91, O55234, P00158, Q9CZR3, Q8C570	196	370	9463	1.69635	1	1	1
KEGG_PATHWAY	mmu04725:Cholinergic synapse	6	1.53061	0.0814141	P68404, P52189, P35561, Q60823, P31938, P11881	196	112	9463	2.58646	1	1	1
KEGG_PATHWAY	mmu04066:HIF-1 signaling pathway	6	1.53061	0.0862927	P68404, Q60823, P31938, P83940, P17182	196	114	9463	2.54108	1	1	1
KEGG_PATHWAY	mmu04012:ErbB signaling pathway	5	1.27551	0.0949624	P68404, Q3ULB5, Q60823, P31938, Q8BMC3	196	84	9463	2.87385	1	1	1
KEGG_PATHWAY	mmu04921:Oxytocin signaling pathway	7	1.78571	0.0962793	P68404, P52189, P35561, P31938, Q5EG47, P11881, E9Q401	196	153	9463	2.20892	1	1	1

## Sheet: Cortex_STRING_PPI
# background genes	# genes	category	chart color	description	FDR value	genes	network.SUID	nodes.SUID	p-value
16238	332	GO Biological Process		Cellular process	3.23e-05	Clcn4|Oxa1l|Agpat3|Chordc1|Cse1l|Prkra|Rab8a|Ppp5c|Lipe|Brinp2|Dnmt1|Kifc2|Map2k1|Ndrg1|Tomm40l|Pan2|Nutf2|Srp14|Nxf1|Nol3|Slc25a5|Ift27|Cadps2|Ints2|Vmp1|Trpv2|Mtrf1l|Snrpd3|Wdr82|Shc2|Gabra1|Arf5|Gdpd1|Fkbp1b|Txndc17|Traf3|Ryr2|Mrs2|Nup153|Pcbd2|Glrx|Ckmt2|Btf3|Emb|Zswim8|Trim35|Xpo7|Slc7a8|Psmb5|Khnyn|Tars|Rida|Washc5|Naprt|Snap29|Cxadr|Agpat4|Tnfrsf21|Mrpl14|C3|Tapbp|H2-K1|Brd2|Impact|Ak3|Cap…	58895	59251|59236|59743|59245|59692|59209|59968|60211|59827|60115|59845|59137|59275|60166|59548|59695|59215|59329|59407|59257|59944|59788|59113|59152|60058|60151|59851|59362|59425|59107|60049|59923|59830|59986|59590|60145|59200|59143|59905|60196|59863|59620|59740|59617|59575|59149|59392|59290|60193|59173|59176|60100|59104|59533|59578|59611|59650|59326|59440|59485|59917|59965|60160|59908|59689|59527|596…	1.22e-08
8096	204	GO Biological Process		Metabolic process	3.6e-06	Oxa1l|Agpat3|Clpp|Prkra|Rab8a|Ppp5c|Lipe|Inmt|Dnmt1|Map2k1|Senp3|Ube2m|Pan2|Nxf1|Nol3|Slc25a5|Ints2|Vmp1|Mtrf1l|Snrpd3|Wdr82|Gdpd1|Fkbp1b|Traf3|Mrs2|Pcbd2|Ckmt2|Zswim8|Trim35|Psmb5|Khnyn|Tars|Rida|Naprt|Snap29|Agpat4|Mrpl14|C3|Tapbp|Brd2|Ak3|Capn1|Oga|Sacm1l|Sbds|Ptdss2|Iscu|Hspd1|Xrcc5|Epha4|Stk25|Cdk18|Mpc2|Iars2|Anapc2|Itgav|Ttbk2|Ivd|Slc23a2|Pcsk2|Rae1|Aimp1|Nans|Rnf220|Pmpcb|Srd5a3|Nudt9|Cds…	58895	59236|59743|59482|59209|59968|60211|59827|59824|59845|59275|60010|59662|59695|59407|59257|59944|59152|60058|59851|59362|59425|59830|59986|60145|59143|60196|59620|59575|59149|60193|59173|59176|60100|59533|59578|59650|59440|59485|59917|60160|59689|59527|60043|59953|59980|59884|59359|60181|60214|60028|60220|60034|59749|59566|60205|59167|59878|59512|59728|59623|59119|60172|59305|60076|59971|59434|592…	2.27e-10
7673	183	GO Biological Process		Organic substance metabolic process	0.00056	Agpat3|Clpp|Prkra|Ppp5c|Lipe|Inmt|Dnmt1|Map2k1|Senp3|Ube2m|Pan2|Nxf1|Nol3|Ints2|Mtrf1l|Snrpd3|Wdr82|Gdpd1|Fkbp1b|Traf3|Mrs2|Pcbd2|Ckmt2|Zswim8|Trim35|Psmb5|Khnyn|Tars|Rida|Naprt|Agpat4|Mrpl14|C3|Tapbp|Brd2|Ak3|Capn1|Oga|Sacm1l|Sbds|Ptdss2|Hspd1|Xrcc5|Epha4|Stk25|Cdk18|Mpc2|Iars2|Anapc2|Itgav|Ttbk2|Ivd|Slc23a2|Pcsk2|Rae1|Aimp1|Nans|Rnf220|Pmpcb|Srd5a3|Nudt9|Cds1|Abcb9|Mmab|Smarcad1|Fkbp4|Hpx|Tha1|…	58895	59743|59482|59209|60211|59827|59824|59845|59275|60010|59662|59695|59407|59257|59152|59851|59362|59425|59830|59986|60145|59143|60196|59620|59575|59149|60193|59173|59176|60100|59533|59650|59440|59485|59917|60160|59689|59527|60043|59953|59980|59884|60181|60214|60028|60220|60034|59749|59566|60205|59167|59878|59512|59728|59623|59119|60172|59305|60076|59971|59434|59281|59479|59347|59092|60169|60112|596…	4.81e-07
7247	168	GO Biological Process		Primary metabolic process	0.0098	Agpat3|Clpp|Prkra|Ppp5c|Lipe|Dnmt1|Map2k1|Senp3|Ube2m|Pan2|Nol3|Ints2|Mtrf1l|Snrpd3|Wdr82|Gdpd1|Fkbp1b|Traf3|Pcbd2|Zswim8|Trim35|Psmb5|Khnyn|Tars|Rida|Naprt|Agpat4|Mrpl14|C3|Brd2|Ak3|Capn1|Oga|Sacm1l|Sbds|Ptdss2|Hspd1|Xrcc5|Epha4|Stk25|Cdk18|Mpc2|Iars2|Anapc2|Ttbk2|Ivd|Slc23a2|Pcsk2|Aimp1|Nans|Rnf220|Pmpcb|Srd5a3|Nudt9|Cds1|Smarcad1|Fkbp4|Hpx|Tha1|Plp1|Gpt2|Ces1c|Pgls|Celf6|Csnk1g1|Amt|Fbxo33|Rxr…	58895	59743|59482|59209|60211|59827|59845|59275|60010|59662|59695|59257|59152|59851|59362|59425|59830|59986|60145|60196|59575|59149|60193|59173|59176|60100|59533|59650|59440|59485|60160|59689|59527|60043|59953|59980|59884|60181|60214|60028|60220|60034|59749|59566|60205|59878|59512|59728|59623|60172|59305|60076|59971|59434|59281|59479|60169|60112|59665|59416|60163|59716|59881|59746|59134|59182|59752|593…	1.47e-05
6530	167	GO Biological Process		Cellular metabolic process	4.67e-05	Oxa1l|Agpat3|Prkra|Rab8a|Ppp5c|Lipe|Dnmt1|Map2k1|Pan2|Nol3|Ints2|Vmp1|Mtrf1l|Snrpd3|Wdr82|Gdpd1|Mrs2|Pcbd2|Ckmt2|Zswim8|Psmb5|Khnyn|Tars|Rida|Naprt|Snap29|Agpat4|Mrpl14|C3|Tapbp|Brd2|Ak3|Capn1|Oga|Sacm1l|Sbds|Ptdss2|Iscu|Hspd1|Xrcc5|Epha4|Stk25|Cdk18|Mpc2|Iars2|Anapc2|Ttbk2|Ivd|Slc23a2|Pcsk2|Aimp1|Srd5a3|Nudt9|Cds1|Abcb9|Mmab|Smarcad1|Hpx|Tha1|Hmgn5|Car5b|Plp1|Gpt2|Ces1c|Pgls|Celf6|Cox7a2|Csnk1g1…	58895	59236|59743|59209|59968|60211|59827|59845|59275|59695|59257|59152|60058|59851|59362|59425|59830|59143|60196|59620|59575|60193|59173|59176|60100|59533|59578|59650|59440|59485|59917|60160|59689|59527|60043|59953|59980|59884|59359|60181|60214|60028|60220|60034|59749|59566|60205|59878|59512|59728|59623|60172|59434|59281|59479|59347|59092|60169|59665|59416|59413|59185|60163|59716|59881|59746|59134|592…	2.06e-08
6657	158	GO Biological Process		Nitrogen compound metabolic process	0.0066	Clpp|Prkra|Ppp5c|Lipe|Inmt|Dnmt1|Map2k1|Senp3|Ube2m|Pan2|Nol3|Ints2|Mtrf1l|Snrpd3|Wdr82|Gdpd1|Fkbp1b|Traf3|Pcbd2|Ckmt2|Zswim8|Trim35|Psmb5|Khnyn|Tars|Rida|Naprt|Mrpl14|C3|Tapbp|Brd2|Ak3|Capn1|Oga|Sbds|Ptdss2|Hspd1|Xrcc5|Epha4|Stk25|Cdk18|Mpc2|Iars2|Anapc2|Ttbk2|Ivd|Pcsk2|Aimp1|Rnf220|Pmpcb|Srd5a3|Nudt9|Abcb9|Mmab|Smarcad1|Fkbp4|Hpx|Tha1|Hmgn5|Gpt2|Celf6|Csnk1g1|Amt|Fbxo33|Rxrb|Lnpep|Kdm3b|Ube2r2|…	58895	59482|59209|60211|59827|59824|59845|59275|60010|59662|59695|59257|59152|59851|59362|59425|59830|59986|60145|60196|59620|59575|59149|60193|59173|59176|60100|59533|59440|59485|59917|60160|59689|59527|60043|59980|59884|60181|60214|60028|60220|60034|59749|59566|60205|59878|59512|59623|60172|60076|59971|59434|59281|59347|59092|60169|60112|59665|59416|59413|59716|59134|59182|59752|59344|59638|59599|595…	8.76e-06
5681	142	GO Biological Process		Cellular component organization or biogenesis	0.0019	Clcn4|Oxa1l|Chordc1|Rab8a|Dnmt1|Kifc2|Map2k1|Ndrg1|Tomm40l|Nol3|Slc25a5|Ift27|Cadps2|Vmp1|Trpv2|Mtrf1l|Snrpd3|Gabra1|Nup153|Emb|Washc5|Snap29|Cxadr|Tnfrsf21|C3|Tapbp|Brd2|Impact|Capn1|Slit1|Sbds|Iscu|Hspd1|Xrcc5|Epha4|Stk25|Anapc2|Itgav|Ttbk2|Rae1|Pmpcb|Cds1|Smarcad1|Emc3|Cd9|Fkbp4|Mfge8|Hmgn5|Plp1|Emc8|Celf6|Cox7a2|Nckap1l|Sec23ip|Ninj1|Lzts3|Kcnj2|Zfand1|Kdm3b|AW549877|Rab8b|Sema7a|Chd6|Thbs1|T…	58895	59251|59236|59245|59968|59845|59137|59275|60166|59548|59257|59944|59788|59113|60058|60151|59851|59362|60049|59905|59617|59104|59578|59611|59326|59485|59917|60160|59908|59527|59614|59980|59359|60181|60214|60028|60220|60205|59167|59878|59119|59971|59479|60169|59122|59398|60112|59956|59413|60163|59656|59134|59284|59389|59272|59365|59815|60127|59839|59524|59938|59767|59116|59410|60019|59593|59914|601…	2.18e-06
5482	141	GO Biological Process		Cellular component organization	0.00056	Clcn4|Oxa1l|Chordc1|Rab8a|Dnmt1|Kifc2|Map2k1|Ndrg1|Tomm40l|Nol3|Slc25a5|Ift27|Cadps2|Vmp1|Trpv2|Mtrf1l|Snrpd3|Gabra1|Nup153|Emb|Washc5|Snap29|Cxadr|Tnfrsf21|C3|Tapbp|Brd2|Impact|Capn1|Slit1|Sbds|Iscu|Hspd1|Xrcc5|Epha4|Stk25|Anapc2|Itgav|Ttbk2|Rae1|Pmpcb|Cds1|Smarcad1|Emc3|Cd9|Fkbp4|Mfge8|Hmgn5|Plp1|Emc8|Celf6|Cox7a2|Nckap1l|Sec23ip|Ninj1|Lzts3|Kcnj2|Zfand1|Kdm3b|AW549877|Rab8b|Sema7a|Chd6|Thbs1|T…	58895	59251|59236|59245|59968|59845|59137|59275|60166|59548|59257|59944|59788|59113|60058|60151|59851|59362|60049|59905|59617|59104|59578|59611|59326|59485|59917|60160|59908|59527|59614|59980|59359|60181|60214|60028|60220|60205|59167|59878|59119|59971|59479|60169|59122|59398|60112|59956|59413|60163|59656|59134|59284|59389|59272|59365|59815|60127|59839|59524|59938|59767|59116|59410|60019|59593|59914|601…	4.61e-07
5039	133	GO Biological Process		Organonitrogen compound metabolic process	0.00041	Clpp|Prkra|Ppp5c|Inmt|Map2k1|Senp3|Ube2m|Mtrf1l|Snrpd3|Wdr82|Gdpd1|Fkbp1b|Traf3|Pcbd2|Ckmt2|Zswim8|Trim35|Psmb5|Tars|Rida|Naprt|Mrpl14|C3|Tapbp|Brd2|Ak3|Capn1|Oga|Ptdss2|Epha4|Stk25|Cdk18|Mpc2|Iars2|Anapc2|Ttbk2|Ivd|Pcsk2|Aimp1|Rnf220|Pmpcb|Srd5a3|Nudt9|Abcb9|Mmab|Smarcad1|Fkbp4|Hpx|Tha1|Hmgn5|Gpt2|Csnk1g1|Amt|Fbxo33|Lnpep|Kdm3b|Ube2r2|Naa25|Cdk19|Sema7a|Ak5|Rmnd1|Thbs1|Hacd3|Ppig|Dpp9|Josd2|Cpe|…	58895	59482|59209|60211|59824|59275|60010|59662|59851|59362|59425|59830|59986|60145|60196|59620|59575|59149|60193|59176|60100|59533|59440|59485|59917|60160|59689|59527|60043|59884|60028|60220|60034|59749|59566|60205|59878|59512|59623|60172|60076|59971|59434|59281|59347|59092|60169|60112|59665|59416|59413|59716|59182|59752|59344|59599|59524|59602|59737|59755|59116|60055|59212|60019|60130|59206|59296|597…	2.86e-07
4555	129	GO Biological Process		Localization	3.11e-05	Clcn4|Oxa1l|Cse1l|Rab8a|Map2k1|Tomm40l|Nutf2|Srp14|Nxf1|Nol3|Slc25a5|Ift27|Cadps2|Vmp1|Trpv2|Gabra1|Arf5|Fkbp1b|Ryr2|Mrs2|Nup153|Btf3|Emb|Xpo7|Slc7a8|Washc5|Snap29|Cxadr|Slit1|Oga|Ier3ip1|Hspd1|Stk25|Xpr1|Mpc2|Mrc1|Itgav|Ttbk2|Slc23a2|Rae1|Pmpcb|Gabrd|Cds1|Abcb9|Gsdme|Itpr1|Emc3|Ccdc91|Slc6a11|Cd9|Fkbp4|Mfge8|Ipo5|Abcc8|Hpx|Ces1c|Emc8|Csnk1g1|Clcn7|Ipo13|Disp2|Kcnj2|Ttyh3|Sidt1|Mcoln3|Rab8b|Slc22…	58895	59251|59236|59692|59968|59275|59548|59215|59329|59407|59257|59944|59788|59113|60058|60151|60049|59923|59986|59200|59143|59905|59740|59617|59392|59290|59104|59578|59611|59614|60043|60031|60181|60220|59653|59749|59125|59167|59878|59728|59119|59971|59680|59479|59347|59911|59725|59122|59350|59227|59398|60112|59956|59083|59563|59665|59881|59656|59182|59260|59461|59992|60127|59854|59794|59368|59767|599…	7.85e-09
3947	121	GO Biological Process		Establishment of localization	3.6e-06	Clcn4|Oxa1l|Cse1l|Rab8a|Map2k1|Tomm40l|Nutf2|Srp14|Nxf1|Nol3|Slc25a5|Ift27|Cadps2|Vmp1|Trpv2|Gabra1|Arf5|Fkbp1b|Ryr2|Mrs2|Nup153|Btf3|Emb|Xpo7|Slc7a8|Washc5|Snap29|Cxadr|Slit1|Oga|Ier3ip1|Hspd1|Stk25|Xpr1|Mpc2|Mrc1|Itgav|Slc23a2|Rae1|Pmpcb|Gabrd|Abcb9|Gsdme|Itpr1|Emc3|Ccdc91|Slc6a11|Cd9|Fkbp4|Mfge8|Ipo5|Abcc8|Hpx|Ces1c|Emc8|Csnk1g1|Clcn7|Ipo13|Disp2|Kcnj2|Ttyh3|Sidt1|Mcoln3|Rab8b|Slc22a23|Thbs1|M…	58895	59251|59236|59692|59968|59275|59548|59215|59329|59407|59257|59944|59788|59113|60058|60151|60049|59923|59986|59200|59143|59905|59740|59617|59392|59290|59104|59578|59611|59614|60043|60031|60181|60220|59653|59749|59125|59167|59728|59119|59971|59680|59347|59911|59725|59122|59350|59227|59398|60112|59956|59083|59563|59665|59881|59656|59182|59260|59461|59992|60127|59854|59794|59368|59767|59902|60019|598…	2.66e-10
3782	116	GO Biological Process		Transport	3.9e-06	Clcn4|Oxa1l|Cse1l|Rab8a|Map2k1|Tomm40l|Nutf2|Srp14|Nxf1|Nol3|Slc25a5|Ift27|Cadps2|Vmp1|Trpv2|Gabra1|Arf5|Fkbp1b|Ryr2|Mrs2|Nup153|Btf3|Emb|Xpo7|Slc7a8|Washc5|Snap29|Cxadr|Slit1|Oga|Ier3ip1|Hspd1|Xpr1|Mpc2|Mrc1|Itgav|Slc23a2|Rae1|Pmpcb|Gabrd|Abcb9|Gsdme|Itpr1|Ccdc91|Slc6a11|Cd9|Fkbp4|Mfge8|Ipo5|Abcc8|Hpx|Ces1c|Csnk1g1|Clcn7|Ipo13|Disp2|Kcnj2|Ttyh3|Sidt1|Mcoln3|Rab8b|Slc22a23|Thbs1|Mon1b|Cpe|Alkbh5|…	58895	59251|59236|59692|59968|59275|59548|59215|59329|59407|59257|59944|59788|59113|60058|60151|60049|59923|59986|59200|59143|59905|59740|59617|59392|59290|59104|59578|59611|59614|60043|60031|60181|59653|59749|59125|59167|59728|59119|59971|59680|59347|59911|59725|59350|59227|59398|60112|59956|59083|59563|59665|59881|59182|59260|59461|59992|60127|59854|59794|59368|59767|59902|60019|59800|59671|59989|597…	7.38e-10
3943	116	GO Biological Process		Regulation of biological quality	3.11e-05	Prkra|Rab8a|Lipe|Map2k1|Pan2|Nol3|Slc25a5|Cadps2|Vmp1|Trpv2|Gabra1|Fkbp1b|Ryr2|Glrx|Slc7a8|Rida|Washc5|Snap29|Cxadr|Serping1|C3|Tapbp|Capn1|Slit1|Oga|Iscu|Hspd1|Epha4|Xpr1|Mpc2|Iars2|Anapc2|Itgav|Pcsk2|Aimp1|Gabrd|Itpr1|Slc6a11|Cd9|Abcc8|Hpx|Dock11|Ces1c|Nckap1l|Lnpep|Lzts3|Kcnj2|Rab8b|Sema7a|Thbs1|Hacd3|Cpe|Alkbh5|Lrfn4|Irgm1|S1pr1|Daam2|Lipa|Fn1|Cdc42|Kcna1|Cnr1|Camk2n1|Epha5|Prkaa1|Gfap|Rgs7bp…	58895	59209|59968|59827|59275|59695|59257|59944|59113|60058|60151|60049|59986|59200|59863|59290|60100|59104|59578|59611|59287|59485|59917|59527|59614|60043|59359|60181|60028|59653|59749|59566|60205|59167|59623|60172|59680|59725|59227|59398|59563|59665|59335|59881|59389|59599|59815|60127|59767|59116|60019|60130|59671|59989|60109|59761|59857|59443|59239|59476|60118|59464|59308|59683|59467|59077|59218|600…	8.3e-09
4513	111	GO Biological Process		Multicellular organism development	0.0326	Prkra|Rab8a|Brinp2|Dnmt1|Map2k1|Ndrg1|Slc25a5|Ift27|Vmp1|Gabra1|Ryr2|Btf3|Emb|Cxadr|Tnfrsf21|C3|Brd2|Impact|Slit1|Sbds|Ier3ip1|Hspd1|Xrcc5|Epha4|Stk25|Anapc2|Itgav|Ttbk2|Pcsk2|Aimp1|Rnf220|Gsdme|Itpr1|Slc6a11|Cd9|Fkbp4|Mfge8|Dock11|Pir|Plp1|Nckap1l|Rxrb|Ninj1|Necab1|Mcoln3|Sema7a|0610010F05Rik|Thbs1|Tbce|Cpe|S1pr1|H2ax|Daam2|Gpr37|Lipa|Fn1|Cdc42|Kcna1|Cnr1|Epha5|Gfap|Vps13a|Abcd2|Itpkb|Tmem143|Md…	58895	59209|59968|60115|59845|59275|60166|59944|59788|60058|60049|59200|59740|59617|59611|59326|59485|60160|59908|59614|59980|60031|60181|60214|60028|60220|60205|59167|59878|59623|60172|60076|59911|59725|59227|59398|60112|59956|59335|59080|60163|59389|59638|59365|60070|59368|59116|59545|60019|59593|59671|59857|59998|59443|59224|59239|59476|60118|59464|59308|59467|59218|59317|59242|59179|59581|59920|597…	0.0001
4003	103	GO Biological Process		Protein metabolic process	0.018	Clpp|Prkra|Ppp5c|Map2k1|Senp3|Ube2m|Mtrf1l|Snrpd3|Wdr82|Fkbp1b|Traf3|Zswim8|Trim35|Psmb5|Tars|Mrpl14|C3|Brd2|Capn1|Oga|Epha4|Stk25|Cdk18|Iars2|Anapc2|Ttbk2|Pcsk2|Aimp1|Rnf220|Pmpcb|Srd5a3|Smarcad1|Fkbp4|Hpx|Csnk1g1|Fbxo33|Lnpep|Kdm3b|Ube2r2|Naa25|Cdk19|Sema7a|Rmnd1|Thbs1|Ppig|Dpp9|Josd2|Cpe|Nek9|Irgm1|Asrgl1|Fn1|Cdc42|Nhlrc3|B3galt6|Fem1a|Rps21|Epha5|Phka1|Prkaa1|Vps13a|Prkcb|Csnk1g3|Cdk17|Gid8|P…	58895	59482|59209|60211|59275|60010|59662|59851|59362|59425|59986|60145|59575|59149|60193|59176|59440|59485|60160|59527|60043|60028|60220|60034|59566|60205|59878|59623|60172|60076|59971|59434|60169|60112|59665|59182|59344|59599|59524|59602|59737|59755|59116|59212|60019|59206|59296|59734|59671|60085|59761|59731|59476|60118|59503|59473|59233|59530|59467|59785|59077|59317|59632|59626|59836|60037|59086|590…	3.52e-05
3447	92	GO Biological Process		Regulation of cell communication	0.0154	Prkra|Rab8a|Ppp5c|Map2k1|Nol3|Slc25a5|Shc2|Fkbp1b|Traf3|Ryr2|Glrx|Cxadr|C3|Capn1|Oga|Epha4|Stk25|Mpc2|Anapc2|Itgav|Ttbk2|Aimp1|Txndc12|Rnf220|Gsdme|Itpr1|Abcc8|Hpx|Csnk1g1|Nckap1l|Rxrb|Ninj1|Tab3|Phlda3|Rab8b|Sema7a|Thbs1|Irgm1|Daam2|Gpr37|Fn1|Cdc42|Higd1a|Cnr1|Smcr8|Fem1a|Camk2n1|Epha5|Prkaa1|Gfap|Rgs7bp|Itpkb|Prkcb|Csnk1g3|Eno1b|Gid8|Hax1|Slc27a4|Nphp4|Stat2|Usp9x|Dgkg|Crhr1|Tmf1|Pak6|P2rx7|Stm…	58895	59209|59968|60211|59275|59257|59944|59107|59986|60145|59200|59863|59611|59485|59527|60043|60028|60220|59749|60205|59167|59878|60172|59431|60076|59911|59725|59563|59665|59182|59389|59638|59365|60025|59896|59767|59116|60019|59761|59443|59224|59476|60118|60091|59308|59947|59233|59683|59467|59077|59218|60007|59179|59632|59626|60106|60037|59146|59221|59428|59605|59686|59074|59539|59779|59320|59926|593…	2.81e-05
3456	91	GO Biological Process		Regulation of signaling	0.0236	Prkra|Rab8a|Ppp5c|Map2k1|Nol3|Slc25a5|Shc2|Fkbp1b|Traf3|Ryr2|Glrx|C3|Capn1|Oga|Epha4|Stk25|Mpc2|Anapc2|Itgav|Ttbk2|Aimp1|Txndc12|Rnf220|Gsdme|Itpr1|Abcc8|Hpx|Csnk1g1|Nckap1l|Rxrb|Ninj1|Tab3|Phlda3|Rab8b|Sema7a|Thbs1|Irgm1|Daam2|Gpr37|Fn1|Cdc42|Higd1a|Cnr1|Smcr8|Fem1a|Camk2n1|Epha5|Prkaa1|Gfap|Rgs7bp|Itpkb|Prkcb|Csnk1g3|Eno1b|Gid8|Hax1|Slc27a4|Nphp4|Stat2|Usp9x|Dgkg|Crhr1|Tmf1|Pak6|P2rx7|Stmn3|Tgm…	58895	59209|59968|60211|59275|59257|59944|59107|59986|60145|59200|59863|59485|59527|60043|60028|60220|59749|60205|59167|59878|60172|59431|60076|59911|59725|59563|59665|59182|59389|59638|59365|60025|59896|59767|59116|60019|59761|59443|59224|59476|60118|60091|59308|59947|59233|59683|59467|59077|59218|60007|59179|59632|59626|60106|60037|59146|59221|59428|59605|59686|59074|59539|59779|59320|59926|59323|600…	5.2e-05
2546	78	GO Biological Process		Regulation of cellular component organization	0.0012	Chordc1|Dnmt1|Map2k1|Pan2|Nol3|Slc25a5|Trpv2|Fkbp1b|Washc5|C3|H2-K1|Impact|Capn1|Slit1|Oga|Ier3ip1|Xrcc5|Epha4|Stk25|Anapc2|Itgav|Ttbk2|Slc23a2|Rae1|Itpr1|Fkbp4|Abcc8|Dock11|Nckap1l|Lzts3|Rab8b|Sema7a|Arpin|Lrfn4|Irgm1|S1pr1|Daam2|Fn1|Cdc42|Higd1a|Cnr1|Smcr8|Epha5|Prkaa1|Gfap|Mdga1|Eno1b|Arpc5|Hax1|Nphp4|Stat2|Ddhd1|Dgkg|Il1rap|Pam|P2rx7|Shroom2|Stmn3|Cirbp|Slc25a33|Arhgef10l|Kdm1a|Plaa|Akt2|Dact…	58895	59245|59845|59275|59695|59257|59944|60151|59986|59104|59485|59965|59908|59527|59614|60043|60031|60214|60028|60220|60205|59167|59878|59728|59119|59725|60112|59563|59335|59389|59815|59767|59116|59812|60109|59761|59857|59443|59476|60118|60091|59308|59947|59467|59077|59218|59920|60106|59704|59146|59428|59605|60121|59074|59515|60103|59926|59635|59323|59899|60097|60142|59959|59110|60082|59551|59842|597…	1.14e-06
2827	78	GO Biological Process		Cellular response to chemical stimulus	0.0217	Prkra|Rab8a|Brinp2|Dnmt1|Ndrg1|Nol3|Slc25a5|Gabra1|Fkbp1b|Txndc17|Traf3|Ryr2|Glrx|Cxadr|Tnfrsf21|Impact|Capn1|Sbds|Hspd1|Xrcc5|Epha4|Stk25|Mrc1|Slc23a2|Rae1|Gsdme|Itpr1|Fkbp4|Ipo5|Abcc8|Hpx|Ces1c|Nckap1l|Ccs|Rxrb|Ninj1|Zfand1|Cdk19|Cpne7|Chd6|Thbs1|Irgm1|S1pr1|Fn1|Cdc42|Higd1a|Kcna1|Epha5|Prkaa1|Msra|Itpkb|Prkcb|Eno1b|Hax1|Slc27a4|Stat2|Adam23|Usp9x|Hmgcs2|Crhr1|Tmf1|Il1rap|P2rx7|Tgm2|Stxbp3|Slc2…	58895	59209|59968|60115|59845|60166|59257|59944|60049|59986|59590|60145|59200|59863|59611|59326|59908|59527|59980|60181|60214|60028|60220|59125|59728|59119|59911|59725|60112|59083|59563|59665|59881|59389|59659|59638|59365|59839|59755|59446|59410|60019|59761|59857|59476|60118|60091|59464|59467|59077|59941|59179|59632|60106|59146|59221|59605|59869|59686|59158|59539|59779|59515|59926|60013|59338|60097|599…	4.65e-05
2859	77	GO Biological Process		Macromolecule modification	0.0342	Prkra|Ppp5c|Dnmt1|Map2k1|Senp3|Ube2m|Snrpd3|Wdr82|Fkbp1b|Traf3|Zswim8|Trim35|Brd2|Oga|Epha4|Stk25|Cdk18|Anapc2|Ttbk2|Rnf220|Srd5a3|Smarcad1|Fkbp4|Hpx|Csnk1g1|Fbxo33|Kdm3b|Ube2r2|Naa25|Cdk19|Sema7a|Thbs1|Ppig|Josd2|Nek9|Alkbh5|Irgm1|Fn1|Cdc42|Nhlrc3|B3galt6|Fem1a|Epha5|Phka1|Prkaa1|Prkcb|Csnk1g3|Cdk17|Dpy19l4|Usp9x|Pam|Mttp|Pak6|P2rx7|Tgm2|Epb42|Ublcp1|Kdm1a|Akt2|Ctdnep1|Chd3|Mtmr3|Usp8|Slc4a10|Tp…	58895	59209|60211|59845|59275|60010|59662|59362|59425|59986|60145|59575|59149|60160|60043|60028|60220|60034|60205|59878|60076|59434|60169|60112|59665|59182|59344|59524|59602|59737|59755|59116|60019|59206|59734|60085|59989|59761|59476|60118|59503|59473|59233|59467|59785|59077|59632|59626|59836|59089|59686|60103|59353|59320|59926|60013|59248|60148|59959|60082|59644|59806|59629|59254|60040|60217|59893|601…	0.00011
2667	74	GO Biological Process		Protein modification process	0.024	Prkra|Ppp5c|Map2k1|Senp3|Ube2m|Snrpd3|Wdr82|Fkbp1b|Traf3|Zswim8|Trim35|Brd2|Oga|Epha4|Stk25|Cdk18|Anapc2|Ttbk2|Rnf220|Srd5a3|Smarcad1|Fkbp4|Hpx|Csnk1g1|Fbxo33|Kdm3b|Ube2r2|Naa25|Cdk19|Sema7a|Thbs1|Ppig|Josd2|Nek9|Irgm1|Fn1|Cdc42|Nhlrc3|B3galt6|Fem1a|Epha5|Phka1|Prkaa1|Prkcb|Csnk1g3|Cdk17|Dpy19l4|Usp9x|Pam|Mttp|Pak6|P2rx7|Tgm2|Epb42|Ublcp1|Kdm1a|Akt2|Ctdnep1|Chd3|Mtmr3|Usp8|Slc4a10|Stt3a|Phkg2|Kct…	58895	59209|60211|59275|60010|59662|59362|59425|59986|60145|59575|59149|60160|60043|60028|60220|60034|60205|59878|60076|59434|60169|60112|59665|59182|59344|59524|59602|59737|59755|59116|60019|59206|59734|60085|59761|59476|60118|59503|59473|59233|59467|59785|59077|59632|59626|59836|59089|59686|60103|59353|59320|59926|60013|59248|60148|59959|60082|59644|59806|59629|59254|60040|59893|60133|60079|59950|601…	6.4e-05
1971	69	GO Biological Process		Organic substance transport	9.67e-05	Oxa1l|Cse1l|Rab8a|Tomm40l|Nutf2|Srp14|Nxf1|Slc25a5|Ift27|Cadps2|Vmp1|Arf5|Fkbp1b|Nup153|Btf3|Emb|Xpo7|Slc7a8|Washc5|Snap29|Oga|Ier3ip1|Hspd1|Mpc2|Slc23a2|Rae1|Pmpcb|Abcb9|Ccdc91|Slc6a11|Ipo5|Hpx|Ces1c|Ipo13|Sidt1|Rab8b|Mon1b|Cpe|Alkbh5|Arf3|D1Ertd622e|Sprn|Plekhf2|Prkaa1|Gfap|Vps13a|Abcd2|Slc27a4|Crhr1|Mttp|P2rx7|Pex10|Stxbp3|Slc44a1|Slc25a33|Clta|Akt2|Acsl6|Slc25a42|Slc4a10|Gjb1|Mfsd4a|Slc4a3|Ra…	58895	59236|59692|59968|59548|59215|59329|59407|59944|59788|59113|60058|59923|59986|59905|59740|59617|59392|59290|59104|59578|60043|60031|60181|59749|59728|59119|59971|59347|59350|59227|59083|59665|59881|59461|59794|59767|59800|59671|59989|59758|59164|59674|60157|59077|59218|59317|59242|59221|59539|59353|59926|59140|59338|60184|60097|59713|60082|59842|59809|60040|60223|59419|59866|59491|59776|59386|595…	4.88e-08
2441	69	GO Biological Process		Macromolecule localization	0.0248	Oxa1l|Cse1l|Rab8a|Tomm40l|Nutf2|Srp14|Nxf1|Ift27|Cadps2|Vmp1|Arf5|Fkbp1b|Ryr2|Nup153|Btf3|Xpo7|Washc5|Snap29|Oga|Ier3ip1|Hspd1|Ttbk2|Rae1|Pmpcb|Cds1|Abcb9|Emc3|Ccdc91|Ipo5|Ces1c|Emc8|Ipo13|Sidt1|Rab8b|Mon1b|Cpe|Alkbh5|Arf3|D1Ertd622e|Sprn|Cdc42|Plekhf2|Kcna1|Prkaa1|Gfap|Vps13a|Abcd2|Slc27a4|Nphp4|Mttp|P2rx7|Shroom2|Cntnap1|Pex10|Rpa2|Stxbp3|Clta|Akt2|Ctdnep1|Acsl6|Rab12|Snx19|Tnpo2|Emc1|Pik3r4|Vg…	58895	59236|59692|59968|59548|59215|59329|59407|59788|59113|60058|59923|59986|59200|59905|59740|59392|59104|59578|60043|60031|60181|59878|59119|59971|59479|59347|59122|59350|59083|59881|59656|59461|59794|59767|59800|59671|59989|59758|59164|59674|60118|60157|59464|59077|59218|59317|59242|59221|59428|59353|59926|59635|59506|59140|59983|59338|59713|60082|59644|59842|59491|59776|59386|59470|59536|59230|595…	6.88e-05
2190	68	GO Biological Process		Nervous system development	0.0035	Rab8a|Brinp2|Map2k1|Ndrg1|Ift27|Gabra1|Emb|Tnfrsf21|C3|Brd2|Impact|Slit1|Ier3ip1|Xrcc5|Epha4|Stk25|Anapc2|Ttbk2|Pcsk2|Rnf220|Gsdme|Slc6a11|Cd9|Plp1|Nckap1l|Mcoln3|Sema7a|Tbce|S1pr1|H2ax|Daam2|Gpr37|Fn1|Cdc42|Kcna1|Cnr1|Epha5|Gfap|Vps13a|Abcd2|Mdga1|Nfia|Glmn|Nphp4|Usp9x|Dgkg|Hmgcs2|Crhr1|Pam|Pak6|Shroom2|Stmn3|Cntnap1|Stxbp3|Kdm1a|Plaa|Akt2|Acsl6|Arhgef28|Slc4a10|Fnbp1|Spg20|Gprin1|Kcnc1|Dtnb|Paf…	58895	59968|60115|59275|60166|59788|60049|59617|59326|59485|60160|59908|59614|60031|60214|60028|60220|60205|59878|59623|60076|59911|59227|59398|60163|59389|59368|59116|59593|59857|59998|59443|59224|59476|60118|59464|59308|59467|59218|59317|59242|59920|60073|59380|59428|59686|59074|59158|59539|60103|59320|59635|59323|59506|59338|59959|59110|60082|59842|59383|60040|60004|59101|59875|59977|59770|59299|596…	4.16e-06
2005	61	GO Biological Process		Protein localization	0.0151	Oxa1l|Cse1l|Rab8a|Tomm40l|Nutf2|Srp14|Nxf1|Ift27|Cadps2|Vmp1|Arf5|Fkbp1b|Ryr2|Nup153|Btf3|Xpo7|Washc5|Snap29|Oga|Ier3ip1|Hspd1|Ttbk2|Pmpcb|Abcb9|Emc3|Ccdc91|Ipo5|Emc8|Ipo13|Rab8b|Mon1b|Cpe|Arf3|D1Ertd622e|Sprn|Cdc42|Plekhf2|Kcna1|Prkaa1|Gfap|Vps13a|Nphp4|Mttp|P2rx7|Shroom2|Cntnap1|Pex10|Rpa2|Stxbp3|Clta|Akt2|Ctdnep1|Rab12|Snx19|Tnpo2|Emc1|Pik3r4|Vgf|Fgg|Lgi1|Trappc8	58895	59236|59692|59968|59548|59215|59329|59407|59788|59113|60058|59923|59986|59200|59905|59740|59392|59104|59578|60043|60031|60181|59878|59971|59347|59122|59350|59083|59656|59461|59767|59800|59671|59758|59164|59674|60118|60157|59464|59077|59218|59317|59428|59353|59926|59635|59506|59140|59983|59338|59713|60082|59644|59491|59776|59386|59470|59536|59230|59560|60088|60178	2.57e-05
1574	58	GO Biological Process		Nitrogen compound transport	0.00021	Oxa1l|Cse1l|Rab8a|Tomm40l|Nutf2|Srp14|Nxf1|Slc25a5|Ift27|Cadps2|Vmp1|Arf5|Fkbp1b|Nup153|Btf3|Xpo7|Slc7a8|Washc5|Snap29|Oga|Ier3ip1|Hspd1|Rae1|Pmpcb|Abcb9|Ccdc91|Slc6a11|Ipo5|Hpx|Ipo13|Sidt1|Rab8b|Mon1b|Cpe|Alkbh5|Arf3|D1Ertd622e|Sprn|Plekhf2|Gfap|Vps13a|Crhr1|Mttp|P2rx7|Pex10|Stxbp3|Slc44a1|Slc25a33|Clta|Akt2|Slc25a42|Gjb1|Rab12|Snx19|Tnpo2|Pik3r4|Vgf|Fgg	58895	59236|59692|59968|59548|59215|59329|59407|59944|59788|59113|60058|59923|59986|59905|59740|59392|59290|59104|59578|60043|60031|60181|59119|59971|59347|59350|59227|59083|59665|59461|59794|59767|59800|59671|59989|59758|59164|59674|60157|59218|59317|59539|59353|59926|59140|59338|60184|60097|59713|60082|59809|60223|59491|59776|59386|59536|59230|59560	1.34e-07
1998	58	GO Biological Process		Regulation of transport	0.0409	Rab8a|Map2k1|Nol3|Slc25a5|Cadps2|Vmp1|Trpv2|Fkbp1b|Ryr2|Nup153|Glrx|Snap29|C3|Oga|Ier3ip1|Iscu|Mpc2|Itgav|Aimp1|Itpr1|Mfge8|Ipo5|Abcc8|Plp1|Ces1c|Nckap1l|Kcnj2|Zfand1|Rab8b|Thbs1|Cdc42|Kcna1|Cnr1|Smcr8|Camk2n1|Epha5|Prkaa1|Gfap|Prkcb|Scn8a|Crhr1|Tmf1|Kcnj4|Pam|P2rx7|Aoc3|Tgm2|Stxbp3|Plaa|Akt2|Acsl6|Ei24|Syt2|Kcnc1|Rab12|Kcnf1|Fgg|Eipr1	58895	59968|59275|59257|59944|59113|60058|60151|59986|59200|59905|59863|59578|59485|60043|60031|59359|59749|59167|60172|59725|59956|59083|59563|60163|59881|59389|60127|59839|59767|60019|60118|59464|59308|59947|59683|59467|59077|59218|59632|59311|59539|59779|60052|60103|59926|59494|60013|59338|59110|60082|59842|59422|60187|59977|59491|60046|59560|59791	0.00015
1863	57	GO Biological Process		Phosphate-containing compound metabolic process	0.0203	Agpat3|Prkra|Ppp5c|Map2k1|Gdpd1|Ckmt2|Naprt|Agpat4|Brd2|Ak3|Oga|Sacm1l|Ptdss2|Epha4|Stk25|Cdk18|Mpc2|Ttbk2|Nudt9|Cds1|Hpx|Pgls|Csnk1g1|Tab3|Cdk19|Sema7a|Ak5|Nek9|Lpcat2|Cdc42|Thtpa|Epha5|Phka1|Prkaa1|Acot11|Itpkb|Prkcb|Csnk1g3|Cdk17|Eno1b|Ndufa3|Dgkg|Hmgcs2|Pak6|P2rx7|Ublcp1|Akt2|Ctdnep1|Acsl6|Mtmr3|Gk|Phkg2|Tns2|Nt5c2|Pik3r4|Gprc5b|Nek4	58895	59743|59209|60211|59275|59830|59620|59533|59650|60160|59689|60043|59953|59884|60028|60220|60034|59749|59878|59281|59479|59665|59746|59182|60025|59755|59116|60055|60085|59914|60118|59500|59467|59785|59077|59509|59179|59632|59626|59836|60106|59677|59074|59158|59320|59926|60148|60082|59644|59842|59629|59458|60133|59950|59668|59536|60154|59263	4.23e-05
1802	56	GO Biological Process		Establishment of localization in cell	0.0174	Oxa1l|Cse1l|Rab8a|Map2k1|Tomm40l|Nutf2|Srp14|Nxf1|Nol3|Slc25a5|Ift27|Cadps2|Arf5|Fkbp1b|Ryr2|Nup153|Xpo7|Washc5|Snap29|Slit1|Oga|Ier3ip1|Hspd1|Stk25|Rae1|Pmpcb|Ccdc91|Slc6a11|Ipo5|Ipo13|Rab8b|Mon1b|Alkbh5|Arf3|Sprn|Cdc42|Plekhf2|Gfap|Vps13a|Abcd2|Slc27a4|Mttp|P2rx7|Shroom2|Pex10|Stxbp3|Slc24a2|Clta|Akt2|Syt2|Rab12|Snx19|Tnpo2|Pik3r4|Eipr1|Trappc8	58895	59236|59692|59968|59275|59548|59215|59329|59407|59257|59944|59788|59113|59923|59986|59200|59905|59392|59104|59578|59614|60043|60031|60181|60220|59119|59971|59350|59227|59083|59461|59767|59800|59989|59758|59674|60118|60157|59218|59317|59242|59221|59353|59926|59635|59140|59338|60067|59713|60082|60187|59491|59776|59386|59536|59791|60178	3.29e-05
1266	51	GO Biological Process		Transmembrane transport	0.00011	Clcn4|Tomm40l|Nol3|Slc25a5|Trpv2|Gabra1|Fkbp1b|Ryr2|Mrs2|Emb|Slc7a8|Hspd1|Xpr1|Mpc2|Itgav|Slc23a2|Gabrd|Abcb9|Gsdme|Itpr1|Slc6a11|Abcc8|Hpx|Clcn7|Disp2|Kcnj2|Ttyh3|Sidt1|Mcoln3|Slc22a23|Kcna1|Cnr1|Gfap|Abcd2|Slc27a4|Scn8a|mt-Cytb|Kcnj4|P2rx7|Pex10|Slc44a1|Slc25a33|Slc24a2|Akt2|Slc25a42|Slc4a10|Gjb1|Mfsd4a|Slc4a3|Kcnc1|Kcnf1	58895	59251|59548|59257|59944|60151|60049|59986|59200|59143|59617|59290|60181|59653|59749|59167|59728|59680|59347|59911|59725|59227|59563|59665|59260|59992|60127|59854|59794|59368|59902|59464|59308|59218|59242|59221|59311|59872|60052|59926|59140|60184|60097|60067|60082|59809|60040|60223|59419|59866|59977|60046	6.19e-08
1263	49	GO Biological Process		Establishment of protein localization	0.00045	Oxa1l|Cse1l|Rab8a|Tomm40l|Nutf2|Srp14|Nxf1|Ift27|Cadps2|Vmp1|Arf5|Fkbp1b|Ryr2|Nup153|Btf3|Xpo7|Washc5|Snap29|Oga|Ier3ip1|Hspd1|Pmpcb|Abcb9|Emc3|Ccdc91|Ipo5|Emc8|Ipo13|Rab8b|Mon1b|Arf3|D1Ertd622e|Sprn|Plekhf2|Gfap|Vps13a|Mttp|P2rx7|Pex10|Stxbp3|Clta|Akt2|Rab12|Snx19|Tnpo2|Emc1|Pik3r4|Vgf|Fgg	58895	59236|59692|59968|59548|59215|59329|59407|59788|59113|60058|59923|59986|59200|59905|59740|59392|59104|59578|60043|60031|60181|59971|59347|59122|59350|59083|59656|59461|59767|59800|59758|59164|59674|60157|59218|59317|59353|59926|59140|59338|59713|60082|59491|59776|59386|59470|59536|59230|59560	3.4e-07
1162	45	GO Biological Process		Protein transport	0.0012	Oxa1l|Cse1l|Rab8a|Tomm40l|Nutf2|Srp14|Nxf1|Ift27|Cadps2|Vmp1|Arf5|Fkbp1b|Nup153|Btf3|Xpo7|Washc5|Snap29|Oga|Ier3ip1|Hspd1|Pmpcb|Abcb9|Ccdc91|Ipo5|Ipo13|Rab8b|Mon1b|Arf3|D1Ertd622e|Sprn|Plekhf2|Gfap|Vps13a|Mttp|P2rx7|Pex10|Stxbp3|Clta|Akt2|Rab12|Snx19|Tnpo2|Pik3r4|Vgf|Fgg	58895	59236|59692|59968|59548|59215|59329|59407|59788|59113|60058|59923|59986|59905|59740|59392|59104|59578|60043|60031|60181|59971|59347|59350|59083|59461|59767|59800|59758|59164|59674|60157|59218|59317|59353|59926|59140|59338|59713|60082|59491|59776|59386|59536|59230|59560	1.13e-06
1238	44	GO Biological Process		Ion transport	0.0089	Clcn4|Tomm40l|Nol3|Slc25a5|Trpv2|Gabra1|Fkbp1b|Ryr2|Mrs2|Emb|Slc7a8|Xpr1|Mpc2|Itgav|Slc23a2|Gabrd|Itpr1|Slc6a11|Fkbp4|Abcc8|Hpx|Clcn7|Kcnj2|Ttyh3|Mcoln3|Slc22a23|Kcna1|Cnr1|Prkaa1|Gfap|Prkcb|Slc27a4|Scn8a|mt-Cytb|Kcnj4|Mttp|P2rx7|Slc44a1|Slc24a2|Slc25a42|Slc4a10|Slc4a3|Kcnc1|Kcnf1	58895	59251|59548|59257|59944|60151|60049|59986|59200|59143|59617|59290|59653|59749|59167|59728|59680|59725|59227|60112|59563|59665|59260|60127|59854|59368|59902|59464|59308|59077|59218|59632|59221|59311|59872|60052|59353|59926|60184|60067|59809|60040|59866|59977|60046	1.23e-05
1342	43	GO Biological Process		Intracellular transport	0.0423	Oxa1l|Cse1l|Rab8a|Map2k1|Tomm40l|Nutf2|Srp14|Nxf1|Nol3|Slc25a5|Ift27|Arf5|Nup153|Xpo7|Washc5|Slit1|Oga|Ier3ip1|Hspd1|Rae1|Pmpcb|Ccdc91|Ipo5|Ipo13|Rab8b|Mon1b|Alkbh5|Arf3|Sprn|Cdc42|Plekhf2|Gfap|Vps13a|Abcd2|Pex10|Stxbp3|Clta|Akt2|Rab12|Tnpo2|Pik3r4|Eipr1|Trappc8	58895	59236|59692|59968|59275|59548|59215|59329|59407|59257|59944|59788|59923|59905|59392|59104|59614|60043|60031|60181|59119|59971|59350|59083|59461|59767|59800|59989|59758|59674|60118|60157|59218|59317|59242|59140|59338|59713|60082|59491|59386|59536|59791|60178	0.00015
968	37	GO Biological Process		Ion transmembrane transport	0.0098	Clcn4|Nol3|Slc25a5|Trpv2|Gabra1|Fkbp1b|Ryr2|Mrs2|Emb|Slc7a8|Xpr1|Mpc2|Itgav|Slc23a2|Gabrd|Itpr1|Slc6a11|Abcc8|Clcn7|Kcnj2|Ttyh3|Mcoln3|Kcna1|Cnr1|Gfap|Slc27a4|Scn8a|mt-Cytb|Kcnj4|P2rx7|Slc44a1|Slc24a2|Slc25a42|Slc4a10|Slc4a3|Kcnc1|Kcnf1	58895	59251|59257|59944|60151|60049|59986|59200|59143|59617|59290|59653|59749|59167|59728|59680|59725|59227|59563|59260|60127|59854|59368|59464|59308|59218|59221|59311|59872|60052|59926|60184|60067|59809|60040|59866|59977|60046	1.42e-05
993	35	GO Biological Process		Phosphorylation	0.0343	Prkra|Map2k1|Ckmt2|Brd2|Ak3|Epha4|Stk25|Cdk18|Ttbk2|Hpx|Csnk1g1|Tab3|Cdk19|Sema7a|Ak5|Nek9|Cdc42|Epha5|Phka1|Prkaa1|Itpkb|Prkcb|Csnk1g3|Cdk17|Eno1b|Dgkg|Pak6|P2rx7|Akt2|Gk|Phkg2|Nt5c2|Pik3r4|Gprc5b|Nek4	58895	59209|59275|59620|60160|59689|60028|60220|60034|59878|59665|59182|60025|59755|59116|60055|60085|60118|59467|59785|59077|59179|59632|59626|59836|60106|59074|59320|59926|60082|59458|60133|59668|59536|60154|59263	0.00012
783	30	GO Biological Process		Regulation of cell projection organization	0.0308	Map2k1|Trpv2|Fkbp1b|Washc5|H2-K1|Slit1|Epha4|Stk25|Anapc2|Ttbk2|Itpr1|Fkbp4|Dock11|Lzts3|Rab8b|Sema7a|Arpin|Daam2|Fn1|Cdc42|Cnr1|Gfap|Dgkg|P2rx7|Kdm1a|Acsl6|Spg20|Lrrc4c|Mag|Gprc5b	58895	59275|60151|59986|59104|59965|59614|60028|60220|60205|59878|59725|60112|59335|59815|59767|59116|59812|59443|59476|60118|59308|59218|59074|59926|59959|59842|59101|59572|59608|60154	9.08e-05
596	29	GO Biological Process		Response to inorganic substance	0.0016	Ppp5c|Fkbp1b|Ryr2|Impact|Capn1|Hspd1|Stk25|Itgav|Abcc8|Ccs|Zfand1|Cpne7|Thbs1|Fn1|Kcna1|Prkaa1|Itpkb|Serpina1c|Serpina1d|mt-Cytb|Hmgcs2|Pam|Mttp|P2rx7|Syt2|Serpina1e|Kcnc1|Serpina1b|Fgg	58895	60211|59986|59200|59908|59527|60181|60220|59167|59563|59659|59839|59446|60019|59476|59464|59077|59179|60124|59701|59872|59158|60103|59353|59926|60187|59155|59977|59266|59560	1.72e-06
745	29	GO Biological Process		Protein localization to organelle	0.0308	Oxa1l|Cse1l|Rab8a|Tomm40l|Nutf2|Srp14|Ryr2|Nup153|Hspd1|Ttbk2|Pmpcb|Emc3|Ipo5|Emc8|Ipo13|Rab8b|Mon1b|Cpe|Sprn|Prkaa1|Vps13a|Nphp4|Pex10|Rpa2|Ctdnep1|Tnpo2|Emc1|Pik3r4|Lgi1	58895	59236|59692|59968|59548|59215|59329|59200|59905|60181|59878|59971|59122|59083|59656|59461|59767|59800|59671|59674|59077|59317|59428|59140|59983|59644|59386|59470|59536|60088	9.15e-05
744	29	GO Biological Process		Inorganic ion transmembrane transport	0.0308	Clcn4|Nol3|Slc25a5|Trpv2|Gabra1|Fkbp1b|Ryr2|Mrs2|Xpr1|Itgav|Slc23a2|Gabrd|Itpr1|Slc6a11|Abcc8|Clcn7|Kcnj2|Ttyh3|Mcoln3|Kcna1|Cnr1|Scn8a|mt-Cytb|Kcnj4|P2rx7|Slc24a2|Slc4a10|Kcnc1|Kcnf1	58895	59251|59257|59944|60151|60049|59986|59200|59143|59653|59167|59728|59680|59725|59227|59563|59260|60127|59854|59368|59464|59308|59311|59872|60052|59926|60067|60040|59977|60046	8.94e-05
766	29	GO Biological Process		Regulation of plasma membrane bounded cell projection organization	0.0409	Map2k1|Trpv2|Fkbp1b|Washc5|H2-K1|Slit1|Epha4|Stk25|Anapc2|Ttbk2|Itpr1|Fkbp4|Dock11|Lzts3|Sema7a|Arpin|Daam2|Fn1|Cdc42|Cnr1|Gfap|Dgkg|P2rx7|Kdm1a|Acsl6|Spg20|Lrrc4c|Mag|Gprc5b	58895	59275|60151|59986|59104|59965|59614|60028|60220|60205|59878|59725|60112|59335|59815|59116|59812|59443|59476|60118|59308|59218|59074|59926|59959|59842|59101|59572|59608|60154	0.00014
671	27	GO Biological Process		Intracellular protein transport	0.0308	Oxa1l|Cse1l|Rab8a|Tomm40l|Nutf2|Srp14|Ift27|Arf5|Nup153|Xpo7|Oga|Hspd1|Pmpcb|Ipo5|Ipo13|Rab8b|Mon1b|Arf3|Sprn|Gfap|Vps13a|Pex10|Stxbp3|Clta|Akt2|Tnpo2|Pik3r4	58895	59236|59692|59968|59548|59215|59329|59788|59923|59905|59392|60043|60181|59971|59083|59461|59767|59800|59758|59674|59218|59317|59140|59338|59713|60082|59386|59536	9.49e-05
508	23	GO Biological Process		Endomembrane system organization	0.024	Rab8a|Map2k1|Ndrg1|Vmp1|Washc5|Snap29|Stk25|Emc3|Cd9|Emc8|Sec23ip|Cdc42|Plekhf2|Abcd2|Tmf1|P2rx7|Akt2|Ctdnep1|Usp8|Snx19|Emc1|Bin2|Trappc8	58895	59968|59275|60166|60058|59104|59578|60220|59122|59398|59656|59272|60118|60157|59242|59779|59926|60082|59644|59254|59776|59470|59377|60178	5.96e-05
398	21	GO Biological Process		Response to metal ion	0.0098	Ppp5c|Ryr2|Abcc8|Cpne7|Thbs1|Fn1|Kcna1|Prkaa1|Itpkb|Serpina1c|Serpina1d|mt-Cytb|Hmgcs2|Pam|Mttp|P2rx7|Syt2|Serpina1e|Kcnc1|Serpina1b|Fgg	58895	60211|59200|59563|59446|60019|59476|59464|59077|59179|60124|59701|59872|59158|60103|59353|59926|60187|59155|59977|59266|59560	1.52e-05
337	18	GO Biological Process		Establishment of protein localization to organelle	0.0236	Oxa1l|Cse1l|Tomm40l|Nutf2|Srp14|Ryr2|Nup153|Hspd1|Pmpcb|Ipo5|Ipo13|Rab8b|Mon1b|Sprn|Vps13a|Pex10|Tnpo2|Pik3r4	58895	59236|59692|59548|59215|59329|59200|59905|60181|59971|59083|59461|59767|59800|59674|59317|59140|59386|59536	5.31e-05
351	18	GO Biological Process		Anion transmembrane transport	0.0306	Clcn4|Slc25a5|Gabra1|Emb|Slc7a8|Xpr1|Mpc2|Slc23a2|Gabrd|Slc6a11|Clcn7|Ttyh3|Gfap|Slc27a4|Slc24a2|Slc25a42|Slc4a10|Slc4a3	58895	59251|59944|60049|59617|59290|59653|59749|59728|59680|59227|59260|59854|59218|59221|60067|59809|60040|59866	8.7e-05
132	11	GO Biological Process		Multicellular organismal signaling	0.0203	Fkbp1b|Ryr2|Cxadr|Kcnj2|S1pr1|Kcna1|Scn8a|P2rx7|Cntnap1|Slc4a3|Mag	58895	59986|59200|59611|60127|59857|59464|59311|59926|59506|59866|59608	4.1e-05
122	10	GO Biological Process		Protein secretion	0.0326	Rab8a|Fkbp1b|Rab8b|Mttp|P2rx7|Stxbp3|Rab12|Snx19|Vgf|Fgg	58895	59968|59986|59767|59353|59926|59338|59491|59776|59230|59560	0.0001
100	9	GO Biological Process		Calcium ion transmembrane import into cytosol	0.0343	Nol3|Trpv2|Fkbp1b|Ryr2|Itgav|Itpr1|Mcoln3|P2rx7|Slc24a2	58895	59257|60151|59986|59200|59167|59725|59368|59926|60067	0.00012
4	4	GO Biological Process		Response to methanol	0.0047	Serpina1c|Serpina1d|Serpina1e|Serpina1b	58895	60124|59701|59155|59266	5.87e-06
6	4	GO Biological Process		Response to chromate	0.0105	Serpina1c|Serpina1d|Serpina1e|Serpina1b	58895	60124|59701|59155|59266	1.71e-05
9	4	GO Biological Process		Negative regulation of serine-type endopeptidase activity	0.024	Serpina1c|Serpina1d|Serpina1e|Serpina1b	58895	60124|59701|59155|59266	5.6e-05
