# Supplementary material for: Uncovering shared and tissue-specific molecular adaptations to intermittent fasting in liver, brain, and muscle
Source: eLife. 2026 Apr 17;14:RP107332. doi: 10.7554/eLife.107332 (PMC13090031; doi:10.7554/eLife.107332)
Supplement: Supplementary file 3. [file elife-107332-supp3.xlsx]

## Sheet: Common Proteins
Liver only	Muscle only	Cortex Only	Liver+Muscle	Liver+Cortex	Muscle+Cortex	Liver+Muscle+Cortex
A9R9W0	P13504	E9PYB4	A6ZI46	P63260	Q60870	P62743
Q61153	P02535	Q7TSH7	Q9WUA5	Q9CQW0	Q80UW2	P14602
Q99KU6	Q8BJ56	Q91XZ8	Q3TLP5	Q61390	Q8VED5	P16627
Q9D0J8	Q4FZG7	Q7TN33	Q9D2C7	Q60963	Q01097	P47955
P56400	Q61555	Q64512	Q91WP6	Q9R0A1	Q8BXR9	P62843
Q5U4H9	Q3KNY0	Q9D0P8	P50462	Q61036	O88737	Q8K4F5
AMYS	Q9DC77	Q8BGA9	A0A571BF58	Q61301	Q148V7	Q99J56
Q9CPX8	G3X8Y1	Q3V140	Q9JKB3	P60824	Q6PH08	Q9DB60
Q3UL36	Q9WUZ5	Q60629	Q00724	Q9CQU3	Q9JJC6	P02463
P15864	Q8BXK9	Q8BYI6	Q80UY1	Q9DCB8	Q99LG2	P58021
Q91WN2	Q8CC36	P27661	P97821	Q8VDU5	P02301.P84244	Q8BY89
Q80T14	O35367	Q9DC11	Q61554	P58158	Q80X73	Q9DC16
Q63836	Q91WB2	Q9QZA0	P46412	Q9JKN1	P32037	O55042
Q9Z1P8	Q9DBB5	P0CW02	P10107	Q9QWR8	E9PW37	Q924M7
Q5QGU6	Q8CCM6	A2AJQ3	Q80ZS3	P51954	Q9CR21	Q8VE38
Q61462	P51912	Q8VHK1	O89020	Q91W34	P63213	O54962
P56655	O88346	Q9D2U5	P06683	P61079	Q8R0A7	O88696
P83882	P19123	P32211	Q9JLV1	P18581	P55066	Q6PHZ2
Q9JI08	D3Z7H8	Q60771	Q8CFI2	P97432	Q8BW41	P62075
Q3UC65	Q3TQS0	Q9CYH5	P16015	P0C7L0	Q9EPL2	Q8R5C5
A0A075B5N9	P49300	P35347	P97872	Q6P9N8	Q920P5	Q8R3F5
Q91Y74	Q80ZA4	Q8R3V6	P49290	P97930	Q99LT0	P01942
Q8CGR7	Q9JMH3	Q8K097	O09110	Q6PE15	Q9Z1T2	Q8BI08
HBA	P27573	Q80UK8	Q60994	P98086	Q5FW52	Q8CHP8
Q8BH35	Q80XB4	A3KFM7	Q91XL1	Q8BHS3	O55033	P15327
Q9WV96	O70571	A0A5F8MQ13	P97328	O35969	P04247	Q9QZ06
Q9CPP0	Q8CGN5	Q6AXF6	P31725	A2APV2	P35802	Q61696
Q9CR13	Q792Z1	P70377	P15626	Q80W47	P28867	Q9Z2L6
Q8BGB8	Q99MQ4	Q924Z6	E9Q4Z2	P61290	Q5SX40	Q8BK08
P48428	A2A863	D3Z0P8	Q6NT99	Q8R3G1	P70288	O88712
Q99N42	Q8BG60	Q80TR4	P82198	Q9JIM1	Q6P5D3	P62071
Q8K4L0	P70695	P70193	Q60866	Q8R3Q0	Q80TJ1	P46978
Q99JR6	D3Z6H8.P0DMN7	Q9JIZ9	Q61646	Q9CQF3	Q8BP92	A2ASQ1
Q99PW4	Q149B8	Q91WF7	Q8R1K4	A2AQ07	Q3TBW2	P29391
P26350	Q9R000	O70131	Q925F2	Q9CW07	Q8BIG7	Q9R069
Q62264	P35385	Q9JHJ8	O08605	Q8K0B2	O88441	Q9CQ89
P08607	A2A9K7	Q8BGF7	Q91VK1	Q9JM14	Q91XV3	Q8BWM0
P70424	A2VDH3	O70139	Q921U8	Q6P4S6	Q03734	Q9R0Q9
A0A571BD48	Q9JJW5	Q3TP92	A6H6E2	Q9D1L9	A0A1W2P7J1	Q8R2Y8
Q566J8	D3Z689	Q6PDX6	Q08481	Q8VHQ9	Q9Z0F7	Q91XD7
Q9Z2J0	P09542	P26645	P52430	Q9JKY0	P50153	P09528
Q921I2	Q9JLI2	Q9R1Z7	Q3UZA1	Q8QZZ7	P17183	Q9CR67
O08717	Q61475	Q6PDC8	A2BIM8.P02762.P04938	P70245	Q62420	Q64310
E9Q2C0	P50543	Q9CR30	P00329	A6H6A9	P62482	Q8R0N6
Q921I0	Q6IFX2	Q8BKH7	Q8CJ53	P51163	Q9WUB4	Q9CPQ3
A0A075B5R2	G3UW82	A2AF47	P49138	Q61205	Q7TQF7	P42125
Q9QXZ6	Q8VE91	Q61062	Q91VS7	Q8CAF4	Q3TDK6	P34884
S4R1W1	Q80X56	P70196	Q8VCT4	Q6NXI6	Q8VD26	P67778
A2AS89	Q17ST2	P57724	Q64726	Q3UHQ6	P31324	P70349
Q9CPW9	Q8C110	E9Q7M2	Q8C6K9	P62746	Q9CRY7	Q9ERF3
Q7TQK4	Q3TZ89	Q9CXK8	Q08857	Q9Z0H8	P30275	Q4VAA2
Q921V5	Q99K82	Q923G2	Q01149	Q80TM6	Q8VE33	A8DUK4
Q8K558	P37889	Q8BVR6	P31428	P58802	O70443	Q8BVE3
A0A075B5P0	Q5EBG6	P40237	P70266	Q60738	P09041	Q9D0M5
Q71KT5	D3Z1D3	D3Z6Q9	Q8C7E7	O89079	Q9EQK7	Q02357
E9PYP1	Q91YE8	Q9JL62	Q9ESD7	P97785	P23927	Q91VW3
O55239	Q3V009	P98191	P19001	O35683	Q9Z1G3	P50096
Q9JIY7	A0A571BEN1	Q8BFV2	O70475	Q9WUU9	Q9D6N5	Q8C7D2
P33622	Q8BLU2	Q8VCC8	Q9JK92	A3KGB4	Q99K85	P11438
Q9Z2V4	Q9D6X6	Q8C0V0	Q8C196	Q8R366	Q61553	Q9DC63
Q8CIM3	G5E8J6	Q8BGY2	Q9DBD0	Q61140	Q9CR64	Q9JK42
Q9D8B3	Q9WTZ2	Q9D7M1	Q3ULW8	P28028	Q91ZZ3	Q9D1J3
P19639	Q64522	Q8CHY3	Q923B6	A2AQ19	P56564	P70195
Q9CYV5	Q61245	Q9DCU2	Q9CZR2	Q8BX09	Q8R464	P04104
E9Q137	Q64449	Q8BMS9	P60710	Q9CWB7	Q9WTK3	P17563
P06339	Q6P5C5	O70166	P01897	Q8CH72	A6H630	Q9CZN8
Q6NXN1	A0A087WR45	Q8VIN1	P01029	Q3TH73	Q8CBA2	Q3UMR5
A0A075B5R5	Q9R059	P27545	P53657	Q8CGU1	P14231	Q8BGX2
Q9DCG2	O55103	Q9D0U6	E9Q0F0	Q7TQI7	Q8VI63	Q9JHU9
Q8K094	Q8CD91	Q99LL5	P04117	Q80U38	Q80V26	P52503
Q76M72	A2ABU4	G5E8F4	A6H584	Q8BHC4	P11404	Q9CZB0
P04945	Q9ES83	P04443	P26262	Q8JZK9	P61211	Q8VBZ3
Q8C2A2	Q148W8	P35561	P00687	Q99PI5	Q6P8J7	Q9Z2C5
A2ADA5	Q9CR76	Q8BH65	A0A0A6YXW6	P62274	Q920I9	Q9Z2I8
Q9DCC7	O88623	Q5DU14	Q99JY3	Q99J23	Q63810	P15508
Q8C7G5	O88207	Q80VW5	Q9DBM2	Q8K1E0	Q61285	P54071
A6H6J2	O70373	O88796	Q8K4L3	Q99KP3	Q9JI91	Q9Z2H5
S4R2K0	O70624	Q9WV95	Q61586	Q5U4C3	Q9CR29	Q9CYN2
Q9CX98	O89104	Q9QXW9	Q5SSK3	Q3UHA3	P0C605	Q9Z0P5
Q8VDT9	A0A075B5R2.A0A075B5R3	Q9DB70	Q62422	P09925	P18872	Q9JM52
Q9CPX7	Q924X2	Q08122	Q80X19	Q9QXA5	P08551	P63028
O35657	Q8BWB1	Q6DFW5	P28654	P60603	P67871	Q9WVL0
P10648	Q8R5A0	P97433	P49182	O54967	P03911	O35658
Q8CIG3	Q9QZZ6	Q8BH27	Q9DBG1	E9PYD1	Q61097	Q9D0S9
P47877	P0C5K1	Q9CQX5	D3YXF5	P70182	O70228	Q61753
P97762	Q9QZJ6	O88455	Q6P9Q4	Q9D0L7	O35927	Q91WM2
Q8R0Z6	P68369	Q9WUP4	Q62000	Q8K1X1	Q3UH66	P03953
Q91XE0	Q8VEL0	Q8C407	Q5ND29	Q80SY4	Q91VR7	Q9DBE8
Q8CIL4	A2AJ76	Q9JJE7	Q61703	P55065	Q4VAE3	P38060
Q8BGI5	Q8R2G4	Q6P8M1	Q9ESL4	O70309	Q8K3R3	P04919
P97360	P82350	Q8BM11	P51885	Q60715	Q5NBX1	P17095
Q8VCZ9	Q9JIF9	Q9CWD8	Q8K1E6	Q7TT18	Q8BXA5	Q76LS9
Q9JIX0	Q99MR9	Q3U4G3	Q9Z1M4	Q8VC31	P97447	P61514
Q9DBI0	Q9WV35	P00158	A0A5F8MPH8	Q6XPS7	Q9Z2Q6	P13634
P26928	Q62181	Q3UGP8	Q07456	A2AR02	P68404	Q9EPL8
ALBU.1	Q8C013	A0A338P6I9	P06684	Q6GQS1	P54285	Q99L43
Q9DCY0	Q9QZ57	Q6IE26	Q8CFX1	Q810U5	Q8BGH4	Q64337
Q6ZWU9	Q8R4E4	O35900	Q62087	Q9EP53	O70161	Q60960
P01631	G3XA50	Q8VEB3	P50431	Q9WV69	P40240	P97798
Q8C3B8	Q8BWA5	Q8C6G1		Q6A009	Q0VF55	Q499X9
A2AGH6	A2AMM0	Q9WU63		Q9WUR9	Q5BKP2	Q9D7X3
O35728	P51667	Q91Z92		Q5IRJ6	Q61644	Q9DCT8
O35134	Q9EPX2	Q9Z1X2		P59808	Q91V14	Q9DCW4
Q99N16	A2AQP0	Q8R4F0		Q8BWP8	P83510	Q9Z0P4
P18828	Q60935	Q61146		P53798	P07091	O88986
Q9D1R9	Q9QWV4	Q8BJ03		P51855	Q91V61	Q6TEK5
Q9QYR7	P59266	Q9ERR7		Q8C5N3	Q8VDP6	Q9Z2A9
O08983	P11152	Q9Z2I2		Q6EDY6	Q6PAM0	Q9WTQ8
A0A0A6YYE7	Q6ZPS2	Q8VEH6		Q75N73	P55772	Q9D154
Q5FW57	Q8BGU0	Q8K358		Q99LD8	F6SEU4	Q9D7A8
Q8JZZ6	Q5DTJ9	Q8BMQ8		Q9JHQ5	Q5M8N0	Q9DCS3
Q8BPT6	P15331	P60898		Q8BMQ2	B2RSH2	E9Q3L2
Q61133	A0A338P6S8	Q04692		P13439	Q8CAA7	P23506
K2C1	Q70KF4	O35723		Q9DAZ9	P18654	F6TQW2
Q9JIY2	P62932	Q5RJH3		Q3UDR8	Q2NL51	P08032
Q9D187	Q8VCR8	Q8BWU3		Q3V0K9	P60879	Q62165
Q9D939	Q8CHS7	Q8BHD0		Q91WL8	P63030	Q8K4Z3
Q8CHY6	P08207	Q9JKV5		Q80V94	Q8BH58	P16045
Q63880	Q3TJD7	Q99MV7		P98192	Q8K394	Q9CPU2
Q8C5L7	Q5XKE0	F6ZE64		O35435	O88910	Q8CFI5
Q9CQT9	A2AUC9	Q8C006		P97386	Q80YN3	Q78XF5
Q9CQF8	Q99MS7	Q9D8V0		Q9CXI0	Q08642	P62983
Q6ZPR6	P15089	Q8BMC3		Q8BU11	P20357	Q9JKW0
Q9JJL3	Q64347	Q8C031		Q3UPH1	O54983	Q00896
P48410	O70548	Q6DD96		Q8K1A5	Q9Z0J4	A0A1Y7VJN6
Q3TL26	Q8BGM7	Q6ZWM4		P28658	Q91ZP3	Q61151
P47964	E9QA62	Q62101		Q6DFV3	Q9D0I6	P50544
Q8BMK0	E9PV66	Q9ES07		Q8CCH2	P35762	P19157
P02104	O08911	Q5RJG7		P17879	Q9ERD7	O35459
P97325	Q9JKS4	Q8VE73		Q8VCE2	Q3USB7	Q99JY0
P18528	Q09M05	Q8VE08		Q9QVP9	P97346	Q9JKV1
Q8C6I2	E0CYV9	Q6P9Z1		Q924T2	Q91Z83	P06909
Q8VE10	Q9DB76	Q3UHF7		Q3U829	Q62048	Q9QZ88
Q8BGM4	E9Q264	P59240		O35704	Q9D071	P28650
Q8C092	Q3V1D3	Q9DBR4		Q9CQF6	Q8BG39	Q9QYB8
Q9CR84	Q9WV06	Q9QX15		O35239	P11798	Q9JMG1
Q9JJW0	Q61789	Q9Z307		Q8R180	A2RTH5	Q9CQW1
Q5QR91	Q8CEZ1	Q8K0C1		Q9JLQ2	Q91Y86	P29595
P08680	Q9JLH8	Q9CPS8		Q4FK66	O35855	Q66GT5
A0A075B5N3	Q924C5	Q3V132		Q9WUU8	P63268	P62267
Q8R3Y5	Q9D1F9	Q9CV28		Q91X97	P09541	Q8BMS4
Q9JLZ8	P30412	Q3V0C5		P81117	Q99PJ0	P00920
Q9CR24	A2AAJ9	Q6NZK8		Q9JLR9	O88456	P50285
Q8R1S9	Q1XH17	Q9D9M2		P43247	Q99J45	P48962
Q3TA59	Q62009	Q9JMG3		Q9EQ80	Q9CQ92	P18242
Q8CHQ9	P63163	Q8C8T8		Q5DU57	Q8VED9	Q7TSQ8
Q6PB51	O09165	Q6P8I4		O35488	P60487	P40936
E9Q7D5	Q921R8	Q9QZI8		Q9DB25	P48774	Q923Z3
P01844	P20801	Q63943		Q64735	O88545	Q3UVK0
Q6NSQ7	P61079.P62838	A8C756		Q9CQ48	P00397	Q8CCF0
P60334	Q99LM3	Q9CR20		Q9JJZ6	Q9ERA6	Q9WUK2
A2AIL4	Q8BK84	Q8BZ36		Q9CWG8	B8JJ69	Q9ET54
Q06770	P97457	Q5SU73		O89051	Q8R3V5	Q9CQ91
Q91Z58	Q8R4S0	P70423		Q9D8P4	Q9D2N4	Q99N93
Q8CGP0.Q9D2U9	P82347	Q0KK59		P97801	Q6P3D0	Q9CQJ6
Q9DAC7	P82349	P70426		Q8CFA2	P61971	Q9EPK7
Q3U515	Q9D7J6	Q3U0P5		Q91X51	Q9QYR6	O89023
Q9CRB2	D3YYU8	G3X8X0		E9Q555	Q641P0	Q9D1M0
P46425	Q8K0L0	Q61539		Q6PHZ5	Q9ES97	Q99L13
Q8BWH0	Q8C7B8	D3Z7H4		Q3UBG2	Q91YS8	Q06890
O88962	Q8CI70	Q9ERV1		Q922Q9	P97382	Q922B1
G3X9Z4	Q8BGK2	Q69ZB3		P22682	P28663	Q64105
Q8VCH6	Q9WVH9	Q9CQ45		O35972	P05480	P10922
CAS1	Q8C494	Q60829		Q8BTY8	Q8R001	P14206
Q64446	Q9CZA6.Q9ERR1	Q3TAA7		Q3TQB2	Q9CTY5	Q8VE95
Q8K1Y2	E9PZQ0	P58391		Q8K012	Q8BLQ9	Q8R242
O35613	Q8CI12	P26339		Q8BYK6	Q99104	Q61171
Q8QZY2	Q62234	Q69Z89		Q99JW2	Q9JKK7	Q9D7N3
Q99P27	Q8VIB3	P0C0A3		Q7SIG6	P56392	P01837
Q9CQW9	P28481	Q9QY42		Q7TNE3	Q99JN2	Q61207
Q9CWP6	Q3UES3	Q8R1B0		Q8C1E7	O70481	O35864
Q08879	Q7TPW1	P55088		Q80X71	Q3UH68	O89112
Q9CQU8	Q8CGY6	Q3U1V8		O35963	O54991	Q8R1S0
Q8R3I3	Q3UJ81	Q8K4X7		P58742	P04370	Q6NVE9
Q8R1M2	P70170	Q99MB7		Q9D009	Q8R0P4	A2A5R2
O09043	Q9JK37	P56546		Q61823	P84228	P20444
Q8C142	Q9QZ47	O70579		Q9DBL2	O88990	Q8K354
P97478	Q99PR8	Q64676		Q9DD03	Q62059	P20108
Q9CWY8	Q91VJ2	Q5NCE8		Q9CY34	O88492	Q9DBH5
A2A4P0	P21844	Q9CRA9		Q6PGB6	Q8BMF3	O88544
Q8C7V8	Q14BI5	Q8C3X2		P70175	Q8R404	Q99J39
G3X982	Q9ET78	Q6QWF9		Q8BYL4	Q920M5	Q60737
P01639	E9Q9K5	Q3UWE6		Q9JHK5	Q60949	P62869
A0A0B4J1I0	Q4U4S6	P52189		Q9DBL7	P56565	O89086
Q3U1G5	Q99PP9	P48455		Q8JZV7	Q9R1Q8	Q6PD03
L7N466	Q9D9A7	Q8K1X4		P60867	Q8BG95	Q9CQ60
Q3UQA7	P08074	Q8R0A5		B2RY04	Q8CI43	Q05816
P47915	P13542	Q9JLK7		Q8BTS4	Q921L3	Q63918
P97287	Q9ERP3	P20934		P51175	Q61885	Q64669
Q6S9I3	Q8K441.Q8K449	Q8BNL5		O35691	P03888	P53996
Q3URQ7	Q8VBT1	P49117		O70378	Q8VHL1	Q8K273
B5X0G2	P05977	Q9Z123		Q9WVL2	O89114	P59999
Q14AI6	Q9WUZ7	Q8BH73		Q8K1B8	Q9QWI6	P08030
D3Z423	P13541	Q9EQQ2		Q9D945	Q3U9G9	Q80W54
Q5SGK3	Q9ER60	Q61193		Q9D9H8	Q8BYI9	Q9WVJ2
Q4VAC9	P70402	Q6ZPY7		Q8BH69	P97952	Q9D967
Q3U4I7	P14142	Q8VE70		O55137	Q5SQX6	P28665
A0A0A6YXQ0	Q3MI48	Q9DBT4		Q9JK23	P50114	Q8BGS2
Q9DBG9	Q64518	P97470		P50429	P08553	Q9R0X4
Q6P7W5	Q9Z0G2	Q5XJY4		Q8R5A6	Q8R2Y2	Q00612
Q924H7	P21812	Q80UW8		Q8VDS8	E9Q6P5	Q9R062
P39876	Q02566	Q6NTA4		Q9WTP7	Q9ES46	E9Q912
Q8BK35	P57787	Q03719		P62748	Q5NCX5	Q8C1B7
Q924Z4	Q8C9S8	Q9JIN6		O70293	Q80ZJ6	Q924D0
Q9D820	P82348	Q9CXD6		Q0VGY8	P84086	O09172
E9Q1A5	Q7TQ48	Q9QYH6		Q9QXY9	Q9WUA3	Q8BYM8
Q8VDS4	P47968	Q91XY2		Q9QYI5	B2RXT3	O35129
Q9WVB0	P13412	O35682		Q8K0D0	Q9ES56	Q8VEE1
O35930	P97443	Q04899		O09159	Q64444	Q80XN0
G3X9Y6	Q8BU85	Q9DBT3		O55091	Q9D6F9	Q921H9
Q8VCF1	B9EJR8	A2ALW2		O54890	P02469	Q9JKY7
Q8BNI4	Q64691	Q5DU31		Q9DCC4	G5E895	P24668
E9Q166	Q02789	P70213		Q920L1	P20917	Q91WD5
K1C10	A0A075B5V1.A0A075B5V6	Q8BWU1		P59108	Q64332	Q9CXY9
P62073	Q9D783	Q60612		Q921S7	Q3UVX5	Q922Q8
Q9CWI3	Q91V79	Q9CRT8		P23780	Q9D6K8	Q9JM76
P24063	Q8BZ52	Q99KU0		Q9Z2L7	Q3U0M1	Q8BFP9
Q64437	Q9D1H9	Q8JZL3		Q04736	P61205	Q8R3Q2
Q9D3U0	Q8BZ71	P55284		P84089	Q3TMP8	P22315
Q62392		Q7JJ13		Q8CHT3	Q8VE62	Q9QUI0
P97377		Q8CB67		Q6NZB0	Q9D1H7	Q8VDQ8
Q91X52		Q9D2P8		Q8VE09	Q8K0S0	Q9CRB9
Q64505		Q63739		Q60967	O08528	Q8CDN6
ALBU		Q3TYS2		Q9D958	Q00493	Q9ESZ8
Q8R084		Q9CWR1		P14106	Q8R123	Q61792
Q03311		E9Q9D5		Q8K400	Q08460	Q8CHH9
Q9D1M7		Q3U3W5		Q9QZB9	Q3UV70	P70290
Q9D799		Q9Z0U0		Q9R061	Q9JIF0	P54116
Q08761		Q8R1J9		Q6IEE6	Q7TSJ2	Q9CZ04
P99025		P30875		Q6P6I6	Q8BRK9	Q8K1Z0
P58735		Q91VC7		Q8CAK3	P39053	Q8R1I1
O08966		P31648		Q9CZX7	O70209	Q9D2R0
P24721		Q8C120		Q9CR25	Q69ZQ1	Q91Z31
Q5SSI6		Q9D7V2		O08915	P01831	Q8R010
Q6PGH2		O88693		Q14CH7	Q5SX39	A2AWP8
A2ATU0		Q8BPB0.Q921Y0		Q8BPE4	P97797	Q6ZQI3
Q8CIW5		Q9JHG2		Q99K67	P19246	Q61235
D3Z7X0		Q3URU2		Q8BH24	Q9QZ73	Q91V64
Q80VJ2		Q8K0V2		Q8VCL2	Q6PIE5	Q3UBX0
Q3TLD5		P31650		Q9CQE1	Q8R361	Q60634
Q8VCC1		Q7TT23		Q3UFT3	Q9DC22	P55096
P57016		P60904		Q80X85	Q9R0Q3	O70305
P01635		Q6PGF3		Q60953	P49817	Q8BYJ6
Q9CXJ1		Q8R1B5		Q91YE3	P48453	Q7M6Y3
A2AS37		Q8K2G4		Q8VDD8	P56375	A2A8U2
Q9CPY1		Q3UI43		Q07113	P70704	P29699
Q91WE6		Q91WC9		Q9DCG9	Q9WTU6	Q8R574
P20852		O35638		Q99L27	O54865	Q91XU3
Q9JMB0		Q91VC9		Q8C163	Q9CX56	Q9CQZ5
Q8R2M2		Q64519		Q9Z0M5	E9Q236	Q8K3W0
Q9D115		E9PVD3		Q9D0T1	P62761	Q8VBV7
Q8K2Y7		P97438		Q91V81	Q9CZC8	P68134
Q61881		Q9DAM5		Q68FL4	Q70IV5	Q9CZR8
Q9D4E6		Q0PMG2		Q8BPM2	P03921	P07724
P23881		Q6VVW5		P39098	O89017	Q9CQR4
A2AKK5		Q9QWH1		Q8R1K1	P06837	Q9DC61
E9Q3R9		Q8VE85		P97393	Q9JLR1	Q8BWT1
Q91WJ2		Q80TA1		Q8BUR4	Q99NB1	Q9DB20
P01642		Q8K0D7		Q5NCI0	Q9D1X0	Q99LB6
Q8VCH7		Q3TJ22		P62046	Q9R0P9	P18572
Q8CHP5		A2ASI5		O88736	Q80YX1	Q8K370
Q6ZPF4		Q9JHC9		Q91VU7	P61226	Q9DCH4
E9Q8D0		Q6P9N1		Q8BWJ3	P12658	P22599
Q8BHG9		P05214		Q62219	Q8BZF8	Q9QXC1
Q9CY62		Q80V86		Q6PHQ8	A2CG49	Q9DB77
Q9JJ89		O35379		P53612	P60202	Q8CG76
B2RT89.Q96LX3		P37172		Q80XC2	Q6ZPU9	Q9CQ75
P54751		Q9D2C2		Q8C0D4	Q3UN02	Q61735
Q8BGF3		Q8C190		Q8C1Y8	B1AR69	Q8CC86
Q05685		Q8BGV9		P46414	P32848	Q61838
O70570		A2AB59		Q9DB15	Q3UX10	Q8BMS1
Q9D0F4		Q8C180		Q5SVR0	P55012	Q8K0U4
P17717		Q9D2G5		Q6PB93	P59041	P40336
P15535		B1AVP0		Q8BI72	P63318	O35593
Q8K3K7		O55128		P53986	Q9Z0E0	Q5SRX1
P16294		Q9QZB1		Q8R4R6	Q5M8N4	P35564
P13516		P63115		Q6WKZ8	Q9CPU4	Q922E6
Q6P9R1		A2ARS0		Q9D964	Q3TVI8	Q91WK2
B1AQJ2		Q99MX7		Q8VCN5	P63040	P16330
O88803		Q3UDK1		Q9WTP6	Q6PIC6	Q9D1P0
Q8R3C0		P97950		Q91XE8	E9PWZ3	Q9JKB1
Q80ZV0		Q8VHG2		P06537	Q6PD28	P11499
P40694		Q6GQU6		A2APT9	P14873	Q791V5
Q3UBZ5		Q9JHG6		Q8BG30	P13595	Q07235
Q8BP74		Q8BGC9		Q91VX2	P28652	Q9CR86
P04441		Q8BVZ5		Q62172	Q3UHB1	Q80UP3
Q8K2W3		Q8R3R8		Q6PAQ4	Q9JI46	Q8BFZ3
Q8BZX4		Q5SWT3		Q8BJ05	Q61548	Q9Z1Q2
Q9CQV5		Q3UGP9		P35441	O09161	Q8VEM8
Q61409		Q8BZM1		Q6P1H6	Q61481	P23492
A0A0N4SUJ3		Q91WJ7		O89106	P37804	P62880
Q8JZZ0		P52633		Q8BPM0	P56501	Q8BP40
Q9EQW7		Q9D9M5		P70268	Q5XPI3	O88520
Q8K385		Q9JIP4		O70362	P60469	P68510
Q99MZ3		Q8K3C3		Q9CYI4	Q9D6K5	Q9CQQ7
Q921G6		Q8K0X8		Q9D8S3	Q9CWU6	Q8K3J1
Q64374		Q05AA6		P61406	O88935	Q9JIK9
Q8K1J5		Q8BHJ6		Q8BX17	Q8VDI7	Q9WTX5
Q9QZS5		Q8BSI6		Q8CGC4	Q80ZW2	Q99JY8
A0A075B5N4		Q6P5F7		Q5BL07	Q9QX11	Q9Z1K6
Q8R216		P70662		Q5DU37	O55100	Q7TMF3
P26952		Q9QZC7		F2Z3U3	O70622	Q9JKF7
P55050		Q76HP3		Q922H4	O70423	Q9CQ54
Q8BQ30		Q9CZH3		Q9JKS5	Q61743	D3Z2H9
HBB		Q8CG80		Q3UHH1	Q05BC3	Q9D0K2
Q64458		O54901		Q8CIZ8	P84075	Q9Z2Y8
Q9DB42		Q8BG58		Q9Z2A7	Q9R0K7	Q9DCJ5
O35615		Q91ZP9		Q60991	Q8BVF2	P62631
Q9CXL3		O09114		Q9R1P3	P43006	Q8BRH0
Q05117		Q9D0J4		Q80YT7	Q02111	Q3UGR5
P11680		Q80Z25		Q60631	P49813	Q8R0Y8
F6XJP7		Q9DB50		Q9JHS9	Q6P549	Q9WUR2
Q9QZK7		Q9JJJ7		A2AJ88	A3KFX0	P13020
Q8VI84		P28704		P55258	D3Z7P3	P08122
P16110		Q8BKG3		Q9Z0R9	Q80TB8	Q9CQR6
Q9Z126		D3YVV3		Q8BG67	Q6P9K8	O08585
Q91W64		J3QMC5		P42703	Q6PD26	P97765
P12710		Q8BTH8		Q9D8X2	P97355	O55143
Q9ES52		Q6PAL7		Q9QZR0	Q6X893	P62806
Q9D8C4		Q9JIL5		Q3TCN2	Q9JJV2	P53395
Q9CYF5		Q8R0J7		Q8BM55	Q811I0	Q91VM5
O35490		Q80V03		Q8R2U6	Q8C878	P70295
Q5FWH6		Q8K3B1		Q91YJ3	Q9QZB7	Q02248
Q5SWD9		O54828		Q7TN98	O54950	P63323
Q8BK48		Q9EPR4		Q8BYA0	Q925E7	Q9CZY3
Q8BVK9		Q8R1U1		Q8R4U7	P46096	Q8BLY2
Q9Z0K8		Q3UWL8		Q8K212	Q8R127	Q9QXB9
Q8R015		Q9CUN6		Q3UUI3	Q9ESJ4	E9PV24
Q9CY16		Q8CHX7		Q9D1I6	Q6ZWR6	Q00898
Q6QD59		Q91VU0		Q99P30	Q6ZQ73	Q6ZWY3
Q9R092		Q99JW1		P97792	O35343	Q9D517
Q9R0T8		Q9JKL5		Q64378	Q64467	Q3TW96
A2AUP5		B1AR17		O35099	Q9D0L4	Q9EQK5
Q8R105		Q6P9J5		O54825	Q8BH79	Q9D9K3
P48776		Q8BR86		Q8BH55	Q9Z2G1	Q9D892
Q8BHC0		P22933		B2RRE7	Q91UZ1	Q91WK1
Q8C6B9		Q91YY4		Q2TBE6	Q9ERT9	P50446
E9Q8B5		Q76KF0		Q9DBZ5	Q61738	Q8BGR9
Q9CXN7		Q62193		Q9Z2G6	Q8BGB7	Q9D0Q7
P31651		O88834		Q5SUF2	P63054	Q8C3F2
Q91XD4		Q9D6G9		B1ART2	Q920N2	O35609
P35601		Q2MHE5		Q8K2T8	Q8BJD1	Q8BHG1
P55104		O70174		Q80YR4	Q60675	Q811U4
Q8C025		J3QK46		Q8C4J7	Q9CR60	Q99J99
Q61009		Q61183		Q8K297	P07934	Q9CYR0
Q9CW46		Q8VCY8		Q9R049	Q9DBS2	Q91VI7
Q8BM75		Q68FF0		Q8JZM0	Q9R0Y5	O08917
Q8BUH7		O88879		A0A5F8MPI9	Q8CBE3	Q923B0
Q6P2L6		Q9D3S3		Q8JZS0	Q9ET80	Q60597
Q9EQ08		Q3TRM8		Q8VDI9	Q9JMK2	P50396
Q922B9		Q91ZX6		Q8R3Q6	P63011	Q9CQ19
P49710		Q8K0T2		Q3UN04	Q9JJZ2	Q9Z2Q5
Q03160		Q00422		Q9D662	Q8R3Z5	P62918
Q9DB26		Q0VE82		O35955	P84084	O35295
Q8C5R2		Q91YT2		Q8BJ64	Q9QZF2	Q8BKZ9
O54749		P61793		Q9CRC8	Q9D020	Q5FWK3
Q8CGC6		Q9QUN9		Q80W21	Q3UUQ7	Q3U3R4
P29452		Q60571		Q3UKC1	Q8R3B1	O54754
Q9CSB4		O89029		Q9WU60	Q8C0E2	P62281
CATA		Q9D4F2		O88958	P35283	Q9ER35
P70279		Q3TQF0		O08967	P61264	Q91Z53
Q8BZ32		O89026		E0CZ22	Q06138	Q9D898
B8JK39		Q91XL3		Q9CZ83	Q9DCZ1	P21107
Q9DBA6		O08530		Q09200	Q91WC3	P84104
Q9CPR1		Q3UHH2		Q6PDN3	Q7TT45	P45376
K9J7B2		Q8K1S3		Q8R151	Q3UHL1	Q8BK72
E9PVB5		Q8BYP3		Q91YI4	P09470	Q8VEJ9
A2CEK7.E9PVW0		Q8C561		Q571F8	Q60590	Q99KI0
Q9JJ80		Q9D2I5		Q64471	P63044	Q9JJG0
Q9QY93		Q9QZS8		Q8BH44	O55026	Q99LC3
Q3UM18		Q8BHT6		Q8BU31	Q99P31	O70503
Q99N19		P48168		Q922V4	Q9DB73	P29416
Q9CQY5		D3YUJ3		Q4LDD4	O35206	O08997
Q8R5I6		Q8CHK3		Q8BG81	P46660	P63321
P33267		Q6W8Q3		P59114	P21836	Q9CQR2
Q283N4		O35153		Q7TMR0	Q62407	Q8VCA8
Q9JKP7		Q8K3M5		Q8C0K5	Q8R5J9	Q9CXT8
A0A668KLU9		Q8K296		P52795	Q9D1G3	Q8BH86
Q80U70		Q5NCQ5		Q9DC71	C0HKE1.C0HKE2.C0HKE3.C0HKE4.C0HKE5.C0HKE6.C0HKE7.C0HKE8.C0HKE9.Q8BFU2.Q8CGP5.Q8CGP6.Q8CGP7.Q8R1M2	P62320
Q5RJ54		Q8VE52		P35569	Q8C8R3	Q3TDQ1
P11859		Q9CQ49		Q91WG2	P12960	P52825
Q8BGA5		P52875		Q8CFI0	Q64524.Q8CGP0.Q9D2U9	Q9D172
Q8CH02		Q9R1Q9		Q61578	P84309	Q62433
Q8BXB6		P47746		Q9JJH1	Q810U3	P62774
Q8VI94		Q80T85		P51910	Q8R2Z5	Q9Z1F9
P56654		O35544		Q99KD5	Q9CYT6	Q8BKC5
Q91WT7		Q9ER41		Q8VE80	O08532	Q8R307
Q99J62		B2RUS7		Q8C729	P54923	P14094
Q923D1		Q8QZY6		P50428	Q9Z2Y3	Q9CQ62
Q8VCM3		Q9D289		Q80TA9	O70250	Q9CQC9
Q9CQP0		Q8BP27		Q9QXM1	Q9CQ80	Q91VA7
P04202		Q8CIP5		Q6PE01	Q8R429	Q9R233
Q3UIR3		Q3UJP5		Q9DAS9	Q9R118	Q9CXS4
A0A0B4J1H7.A0A0B4J1H8		Q8CIW6		Q8JZR0	P97427	O08715
Q60855		P62340		Q5F2E7		Q91W39
Q9CZE3		Q8JZM4		Q9ERB0		Q9D6R2
Q9JJK5		P61809		B1AUE5		Q9QXY6
Q91WL5		Q0PHV7		Q9QYY0		P0C0S6.Q3THW5
Q9DBF7		Q8K221		P07214		P60670
Q9JJX6		O54784		Q8K1H1		Q8BK30
Q2VLH6		Q9JJ69		Q9CZS1		Q8VHH5
Q8BN21		Q8C3R1		Q60680		P35123
Q3TFK5		Q6GQT6		Q9Z0V7		Q8R0X7
Q64464		Q91WG7		Q6PFR5		Q99KI3
P15307		Q8C4B4		Q80ZK9		Q791T5
Q6KCD5		Q9QYE3		Q9DB29		Q9QXT0
A0A075B5M7		Q9DB32		O35405		Q8K1R7
Q91XE9		P19258		Q0KL02		P70168
P53808		Q3TXX4		Q8R3N6		Q8CAQ8
Q9D8H7		Q8BR90		Q9JHE7		Q9QXX4
Q9JJT0		P55194		Q91VJ5		Q99LY9
Q6DYE8		Q91YD3		B1AZP2		Q8BJY1
P58269		Q60673		Q8CH18		P62264
Q8VCD5		Q80V91		Q8K0C9		Q9DBP5
P51658		Q8BG50		Q91YT7		A3KMP2
Q9WVM8		Q9DAI6		Q9CQV1		P10649
Q9CQB5		E9Q7T7		Q9QZW0		Q921M7
Q05144		Q64707		Q91Z49		Q9ERE7
E9QAP7		A2AJT4		Q80TH2		Q8BG32
Q3UGS4		Q8BVY4		Q0GNC1		Q9WTI7
A0A075B5L0		Q8BUH8		Q6VN19		Q9D6M3
Q9CRA8		Q8C6M1		Q8R0G9		Q07417
Q64339		Q8VEB1		Q99JF5		Q9WTL7
Q9DD20		Q8BSZ2		P54276		Q9D1I5
D3Z0K6		Q8VBV3		Q9ESV0		P58281
P58710		Q99LC8		P69566		Q8R5L3
E9PY03		Q9D0R8		Q6RUT7		Q8K0E8
Q9QYP6		Q6A0D4		Q8VD66		P62270
Q3TGF2		Q9WTU3		Q9JKX6		Q9DCM0
Q8R4Y4		Q8C1S0		Q02614		Q80X50
Q91X91		Q8BNJ3		Q9D9I4		Q9D7G0
Q9D9X6		Q8BYY4		Q9QY36		A2AT37
Q8VC19		Q8CDJ3		G5E870		Q99PL6
Q9DA08		Q9CQ86		Q8R0A0		Q8BFR5
Q9D7J9		Q6ZWR4		O08914		P24270
Q5F2F2		Q5SS80		Q3TIU4		Q8VHE0
Q8K5C8		P22005		Q8C2E7		Q8K1C0
Q9D8K8		Q8BML1		G5E8P1		Q60759
Q3V1V3		Q8BTX9		Q9CQ26		Q61599
Q3UEP4		Q61809		Q8K3X4		Q99P72
Q8K3W3		Q3ULB5		Q8C0Z1		Q4PJX1
Q91VA0		Q80YQ8		P20060		Q8BTZ7
E9PWH2		O35594		Q9CQ06		P49312
Q8K154		E9Q6B2		Q62073		Q9WV98
P56593		Q9JJG9		Q91W18		P50171
Q91V08		P03995		Q99N94		O35215
P05017		Q4QQM4		Q9CYW4		Q8C6B0
Q91Z40		Q8R3C7		Q8R5K4		P06728
Q91X43		Q3TZX8		P46737		Q8BGC4
Q5SX79		Q9R1B9		Q9WU42		Q8BGS7
Q6XVG2		O88602		Q9ERR1		O70400
Q9QXS8		Q8BW70		Q7TQH0		O35083
Q8R3N1		Q921C5		A6X919		P51174
P08071		Q8BGV7		Q78J03		Q9JIG8
A0A075B5V1		Q99ME2		Q9D1E6		Q9D8X1
P11725		Q9CQJ4		Q920Q8		P97390
Q9JK83		Q9DB07		Q8BWU8		Q61545
Q8CFJ7		Q8C460		Q9Z2W1		Q8CAY6
F6Z9B9		Q9R0L6		Q6P5G6		O08759
Q91X77		Q8R092		P11031		Q91ZX7
Q8VC97		P97717		O88735		Q922Q1
P39039		Q99LH2		Q9Z223		Q7TSH2
Q5EBG8		Q7TSN6		Q7TMQ7		O08795
Q69ZN7		Q8BRU6		Q924D1		Q9EPE9
P52840		Q8BJA3		O70370		Q6R891
Q9QXD8		Q8K2L8		Q9D7A6		Q9CZW4
D3YUP5		Q9ERE9		Q9R008		Q8R081
Q9D162		Q920M7		Q9JK81		P70663
Q63886		Q8BG92		Q9D4H9		Q9R1T2
P03958		A2TJV2		Q99M31		P62900
Q9JK38		Q91V51		Q924C1		Q3TIX9
O88908		Q3TUH1		Q60974		Q9CPR5
P60762		Q60841		Q8BWR2		P27546
Q9CR59		O35425		P58059		Q9CZX9
Q921N6		Q0VGU4		Q62393		P19096
Q9WU56		Q61466		Q9CQN6		Q9ERI6
P21180		O35492		Q8CI78		Q9Z1E4
P46656		Q9JIA1		P54103		E9Q735
Q3UYI5		P62812		P54869		P10639
Q3U6U5		Q5SW75		Q8R059		Q6P1F6
Q8BHD8		Q8BMD6		Q8BGD8		Q9D880
Q9JLF6		Q8CF89		Q3V3Q7		P61082
Q9DCD5		P24288		Q9CQ10		Q8BFW7
Q91WS4		Q8R322		Q91WK0		Q9D819
P24456		P41242		Q9WUZ9		P47199
Q8K4H1		P28334		Q9D0B5		P62852
Q8K0D2		P61750		Q69ZX8		Q9WV55
A0A140LIS8		Q149F3		Q9D1G5		E9PVA8
Q9CRC3		Q3UYK3		P52623		Q61830
Q99LG0		Q91ZV7		Q6PEE2		Q505F5
O88451		Q8R2R3		Q61112		Q9EQG9
P83887		Q9ESK3		Q80TP3		Q91YH5
P12791		Q8BGP6		Q3UMU9		P54227
Q03963		O88507		Q3UIA2		P49722
Q9DBJ3		P56818		Q9CR47		Q8R1B4
E9Q842		Q08890		Q8BIP0		P31750
Q8CAS9		Q9JIS5		P28798		Q9Z0X1
Q91X96		Q9WVI9		Q6PIJ4		Q9D0M1
Q3U9N9		P21956		Q9WU40		Q03265
Q9JLJ4		Q8K2V6		A2AWA9		P49586
Q64FW2		Q9JJA2		Q9ES00		Q60649
A0A075B5K2		F7BWT7		Q91WN1		Q61595
Q8CIM7		O54929		O35988		Q8R4N0
Q9Z222		P21661		Q9Z0H3		Q8C0L0
Q9DCJ7		Q8K0G5		O35841		Q80UU9
Q06649		B2RXE2		Q4PZA2		Q922S4
Q9QXD1		E9PV26		Q9CZ28		P14733
Q8R344		Q9EPK2		Q9D0E3		O35857
Q99K41		Q8K3F6		O88271		P23953
Q9R182		Q3TZX3		Q571K4		Q60714
Q921X9		E9PW83		Q8R5C8		Q3U7R1
Q9DBM0		Q8VHQ4		Q69Z38		Q6PCP5
P55292		Q8VEE0		Q9CQF0		Q9ET30
Q9QXY1		P24529		Q3TWW8		Q9DC50
Q64176		Q6ZPK7		P12265		Q925I1
Q91Y47		Q3UM29		Q9Z2G9		Q8JZU2
Q8BU14		P63082		P83741		Q9ET22
O54909		Q3UMB5		P97789		Q7TNG5
Q05421		P68433		Q9WV85		Q9D0G0
Q6PGF5		P61327.Q9CQL1		O09106		P07356
Q9WUK4		Q99JT2		P62331		F8VPK0
P14246		Q8VCZ8		P54254		Q9QZN4
Q3UH06		Q91YK0		Q8VIM9		Q8BL97
Q91WP0		Q7M750		Q9DBR0		O08807
Q9JHD1		Q9CQ33		Q8BWW4		Q8N7N5
P53762		Q9ESX4		Q8BH43		Q60766
Q8VHZ7		Q03137		Q9EQI8		P28660
P97366		Q80UP5		Q8C1B1		Q5SWU9
Q5PSV9		Q9D8Z6		Q80TR8		Q9CZ42
Q91YK2		A2A9C3		Q3UPH7		P01869
Q9D8S4		P63239		Q9D5V6		Q8BWF0
P13597		Q9D6I9		E9PYH6		Q6PDY2
Q8BLY1		O88622		Q9JIA7		Q99KH8
Q8K363		Q3TE80		Q9CQF4		P21550
Q8BVZ1		Q8VDD9		Q99LX5		Q99PT1
Q99PN3		Q9JJF0		Q91WV0		Q9QZ23
P22361		P63058		Q6P1E1		O08600
Q9CWW6		Q8BUN9		O55060		Q9DCV4
P35292		Q8BG18		Q9CWH5		Q06335
Q6PDM1		E9PZM4		Q8K0C4		Q9CPT4
Q7TMW6		Q80TS7		Q8CG72		Q8BG05
Q99L20		Q04888		Q8VCR7		P80314
Q78JT3		Q9QY73		Q8BJU9		Q8VE37
Q62504		Q09143		Q8BMD8		Q8QZS1
Q9DBW0		P60840		Q9CWL8		Q9Z2X1
Q8K4P0		O88974		Q56A08		Q61102
P27048		Q80X66		A2AJL3		Q91VE0
O08692		Q80TN4		Q8K4K6		O08529
Q8BIF9		A2AJW4		Q8R317		P14211
P11247		P97793		Q8K4B0		Q9CWK8
O35730		Q8HW98		P31809		Q8BL66
Q03249		G3X9I7		Q3UVG3		P62835
Q9QY24		Q6GQT5		Q571I9		P70404
P41230		Q8BQP8		Q80X80		Q05920
Q8QZR3		Q6NZL8		Q6DID3		Q91YE6
Q8CGB3		Q80WB5		Q91WT9		Q9D0M3
Q9DCU9		Q8BQZ5		P28063		Q9Z2I9
Q9D0V7		Q9QZB0		Q8VHK9		P07759
P05784		P97467		A2BH40		P07742
Q80VJ3		Q9D708		Q5EG47		Q9DC69
Q60872		Q80YR2		Q8VCH8		Q9EQH2
Q924W7		Q9R088		Q61070		Q78IK2
A0A140T8P9		Q8C9H6		Q3UU96		O55126
Q91V16		P15388		Q9D061		O35344
Q8BW10		O08672		Q61214		Q91VT4
Q64267		P97865		Q62077		Q9CZ13
P47878		Q9ERU3		Q7TPM1		P62141
P11862		Q9Z0E6		Q8CGZ0		Q8C7X2
P97760		Q8R066		Q9CPX6		P62908
Q8K4F6		Q3USZ8		Q9Z1R4		Q6ZPJ3
Q64459		Q78T54		Q91ZM2		P22892
Q8VCU1		Q9D328		Q9WUN2		Q3ULD5
Q91WZ8		Q60603		O88447		Q91VC3
Q8BZ20		Q9D3P8		Q68FM7		Q8BTI8
Q64685		Q6P4T1		Q3URS9		Q61598
P11688		Q8BGY4		Q9WVL3		P48193
Q91YP3		Q8C4Q6		Q8VE97		Q9D8B4
Q9QZ85		Q5RJG1		Q9CQL5		Q8C079
P27656		Q9ER67		Q9CXW2		P63038
P24815		Q8R310		Q9DBT5		P08228
F7ABZ6		Q9D0A3		Q9JJU8		Q8BMA6
Q62230		Q3TRR0		Q9DCJ1		P21619
Q8VC52		Q9Z0Z4		Q9CX30		P99029
Q8K3K8		P59470		A6H5Z3		P32020
Q8CHR6		Q3UVR3		Q99JX4		B1AUN2
Q8VI47		Q6DFY8		Q9CY73		P56480
Q80WR5		Q8R1T1		P62915		Q62086
Q3UED7		P26048		Q99PG2		Q61206
Q9DCQ2		Q8BZQ7		O88630		Q60875
Q91VY9		Q8BLV3		Q62432		P29788
C0HKG5.C0HKG6		Q925N1		A2A654		Q80WJ7
Q3TBD2		Q6PEE3		Q62426		P16125
P28666		Q60803		E9PZJ8		Q8BFY9
Q14CH1		Q91ZW2		Q5SFM8		Q8R164
Q8R4U0		Q9QY15		Q78PG9		Q5SW19
Q91WG0		Q9Z1J2		P53564		O35639
P34927		Q6PD19		Q8BH15		P28352
Q9QY06		Q922J6		Q6GV12		P85094
Q9D902		P15920		Q62415		P70236
Q8R0K4		Q8BZ81		Q3ULL6		Q8K1J6
Q9DB85		Q9CZT8		Q9DAR7		Q9Z1A1
Q8BGL3		P0DP60		A2A6A1		Q9CQC7
Q9JI13		P70459		Q9Z0U1		P60766
Q69ZQ2		A0A1W2P872		Q8CGB6		P42225
Q4LDG0		P58242		Q80XK6		Q5H8C4
P70389		Q9QXV0		P52332		Q62093
Q9DCG6		Q66JV4.Q80YR9		P47856		P70398
Q99JT9		Q9QXV8		P29351		Q64523.Q6GSS7
Q9R269		Q9WV31		A2ALU4		Q6PDM2
Q8R1G6		P47759		Q8C3W1		P41216
P63254		Q91X58		Q3UKJ7		Q91V76
E9Q7F2		Q9JJ61		Q8BNV1		P17427
Q9CPS7		Q61327		Q69ZL1		P60229
Q8CDJ8		A2A6Q5		Q924T7		Q6PAV2
Q9D0R9		Q7TN22		Q9Z0N2		Q3UIU2
P47879		Q8CES0		P58854		P24472
Q9DBB9		Q9Z2D3		Q9EP75		P61961
Q3U3C9		Q9WTK7		Q9CR41		Q80UM3
Q64462		P98200		Q91XY6		Q9JIG7
P56657		Q8JZW5		O35623		Q9CR68
O70145		Q6PCX7		Q8R4X3		Q5SUR0
Q99JG3		Q9DB41		Q9JIW9		P30416
Q9QXD6		Q8CE96		Q6QI06		Q99M71
P16056		Q6P6N5		Q8BWS5		Q9DB27
Q3UP75		Q8BGK6		P60521		Q9D0R2
P51437		Q62406		Q7TPE5		Q9EST5
Q8K0L2		Q9Z0Y1		Q3V1L4		Q99LD4
Q923J1		Q9Z0M3		Q8R238		P05063
O35680		Q3U3Q1		O55022		Q8BU30
Q5HZH2		Q8BZA7		Q99L04		P35980
Q91Y97		Q9ESJ0		Q9Z108		Q00897
P56389		Q9DBR2		Q8VE18		P51150
P25688		P46097		Q8BHJ5		Q9JII6
P08905		Q8BTI9		Q99M51		Q8BL65
Q9Z0Y9		Q5U680		Q91WR3		Q8VEH8
F6U5V1		Q9WUK6		Q3UZ39		O55222
Q9JLZ6		Q62192		Q3URQ4		Q8CGC7
B2RX12		P70365		Q91XF0		Q8K2C9
Q8BVW3		Q91X20		Q5SSH7		P83940
Q8C5P5		Q8BYR5		Q8BK03		P63330
Q9R0M5		Q9ER73		Q9CQE3		Q60770
Q6NWW9		Q9CZ62		Q7TNE1		P54822
J3QNH8		Q8C080		Q8BHL8		Q8BXZ1
Q3UNX5		G5E8C2		B2RXQ2		P62137
Q8BWW9		Q6KAU4		Q9CQ43		Q6ZQ38
Q00262		P0C027.P0C028		Q8JZS9		P56399
Q99N89		Q0VBF8		Q8CI59		O35075
Q8VDQ9		P62309		Q9R1V7		P97364
Q8BXJ8		Q9CZR3		Q60790		Q9EQ20
Q8R1S4		Q9EQG7		Q9CWR2		Q8VDL4
Q9CW42		P70425		Q91XI1		Q61699
Q9Z1R3		Q80U57		Q99LM2		Q64152
Q8VCX1		B1AVZ0		O70496		Q9Z2W0
Q91X34		Q6IMP4		Q00915		Q3TLH4
Q9JHI2		Q63959		Q9DCD6		P47809
Q61510		Q8K1N4		Q61103		Q8R326
P49429		Q9CWF6		Q3UFY8		Q9R0Q7
Q9EPB5		O88597		Q8BRV5		Q8CGK3
Q80SU7		P41233		Q920A5		A2AN08
Q99JZ7		P47867		Q0P678		Q9WV92
Q8BMC4		Q9EQZ6		Q8C9B9		P42859
P00186		Q9CQE7		Q8R1N4		O09167
Q9R098		Q8R191		Q64516		P70362
Q8BZ09		Q9DAI2		P51880		Q9DCM2
Q91YU8		O55192		Q920B9		Q61937
Q99LH1		Q8BZW2		Q8VCX6		Q9DBJ1
Q8BJT9		O35526		Q8BFQ8		Q8VBT9
Q3UEG6		Q8K4T3		Q02257		P63101
P98064		Q6PDG8		P49222		P26443
Q3UHN9		Q96DY5		Q6P4S8		Q61191
Q08288		Q8BTG3		Q8K114		Q9D4H8
P70274		O54781		Q91YD9		Q6IRU2
Q9CRB3		P97441		Q8R313		Q9DAK9
Q8BH00		Q8BWD8		Q9CWU4		Q8VCM7
Q5U5V2		Q5FWH7		Q9DAT5		P38647
Q6P7W0		Q3V3N7		Q6PGH1		Q8K411
Q3UPF5		Q8CEC5		P59016		Q58A65
Q3UND0		Q5PR69		Q5SV85		Q8C0L9
Q9DBA8		D3YVE8		Q07813		Q9CPQ8
Q6PDK2		Q61418		O70439		P62814
Q99LN9		Q8CD26		Q9QYY8		Q9JLZ3
Q2HXL6		Q9EST4		P23475		Q9CWZ7
Q923Q2		Q9R0N7		P16675		Q76MZ3
P23589		Q5SSM3		Q8VCE1		Q3KNM2
Q61878		Q7TPG8		O54941		F6ZDS4
P97348		Q8BGY7		Q8C129		Q60932
Q9QXN0		Q7TSY6		Q99JT1		Q61702
Q8R121		Q8R502		Q8CI08		P12382
Q9D0I8		Q923Z0		Q62189		P63085
E9PZM7		Q9QYS2		Q8K215		Q9CWE0
Q91ZE0		O55057		Q9CQV4		O35350
Q8R2E9		E9Q9Q6		B7ZMP1		Q9D7I5
Q8C0S1		Q9CR89		Q7TSI3		Q80XI3
Q8K119		Q640M6		P97471		P51863
P70324		O08797		P97742		P70296
P35330		A2ALI5		Q8C6G8		Q8BTV2
Q8BGA8		Q6A152		Q8R3Y8		Q9D1L0
P35492		Q9DBN9		Q6ZWQ0		Q9D6J5
P30115		Q641K5		Q9JJ59		Q80UG5
A0JNU3		Q9QWV9		Q9QWY8		Q9CR62
Q8VCS0		Q99ML4		Q9D8Y1		Q9CQS4
E9QAM5		P70453		Q9CZN7		P34022
Q9JL61		Q99MS8		Q8K0V4		Q9WUM5
Q4KL35		Q03059		Q6ZQ88		Q9R0M4
P27046		Q6PIX5		P62305		Q68FE2
Q61083		Q91ZS8		Q9ER39		Q8CFX3
Q61419		Q9WVF8		Q3TAS6		P47941
Q99JH1		Q01063		Q99N95		O08599
Q05915		P52800		Q99N96		P70698
O35601		Q8R2K1		Q8BZN6		P26040
Q9DCX8		P52432		Q8BSF4		Q8VDK1
Q63ZW7		P49769		Q8VDM1		Q9DCF9
D0QMC3		D3YXK0		Q61581		Q9CQJ8
Q9JLI0		P62488		P70452		Q99JB2
Q148V8		Q8BL06		Q9JLI6		Q8BG51
E9PV38		Q8K449		P55937		Q60854
Q80ZQ9		Q2YDW2		Q9Z277		Q99N28
Q69ZR9		B8ZXI1		Q8BWQ6		P10493
Q8BFW4		Q3UXZ6		P68373		Q6DVA0
Q8BHN7		Q9WU28		Q91VZ6		Q8BP67
Q8K0R6		Q8BFQ4		Q9DBS9		P62827
Q99LI5		Q62421		O54692		Q9QUR7
Q5SV80		Q8BX57		Q9D1C8		Q8CI95
Q9R207		Q9CWK3		Q6ZPJ0		Q91YT0
Q6NXL1		P70429		Q8JZM7		Q9D906
O35453		Q8CJ67		Q9CR98		Q91YX5
Q9D937		Q8K3E5		Q99JR1		Q9WVE8
Q5HZI1		Q9DC40		Q60972		P27601
Q9Z2X2		Q8CAL5		P48024		Q9DBS1
Q9D8T2		P70280		Q9Z130		O88746
Q9Z0M9		Q9Z2X8		Q9ERG0		P26039
Q8C8U0		Q9DBX6		Q6PHP4		O55029
P50295		Q9CRA7		Q8BHE8		P49615
O09130		Q8R2R9		Q9CR88		P27659
Q8JZV9		P12657		Q8BZR9		Q9CQ69
O09112		Q9CQ40		B2RXC2		Q8QZT1
Q9ERI5		Q64237		Q6P4T0		P62874
Q8R3H9		Q9JKC6		Q8R570		Q6NVF9
Q8CJ96		P60764		Q8CCN5		Q6DFZ1
Q9D4C5		Q9WV27		Q9WVA2		Q8VHX6
P70194		Q9EPU5		Q8BFR6		Q9Z1J3
Q78IQ7		Q3U0L2		Q9WU84		Q8BMF4
Q91WU0		Q8VDR9		Q8CI32		O70194
Q91X83		Q04735		Q6NZF1		Q3TYX3
Q9D8U0		Q7TNF0		Q8BSK8		P0DP26.P0DP27.P0DP28
O09044		Q60857		O35387		P56380
O08609		Q9QZC2		Q811S7		P47740
Q8K409		Q9CZV8		Q99J08		Q3THK7
Q9EP52		Q7TNR6		Q05186		O35678
Q8R0W0		Q7TSK2		Q8R3F9		P55264
Q8VBT2		Q60928		P17439		Q6NZJ6
Q8BND5		Q9CYN9		Q8K2T1		Q60936
Q9Z1Y4		Q3UH99		Q8JZP9		Q91YM2
Q9JJS6		Q8BZL1		Q6ZQK5		Q8BUV3
Q08093		Q9QUP5		Q7TSE6		Q9Z1T1
Q8R5F7		Q8BMI3		Q5SUC9		Q9DCL9
Q60989		Q8BNE1		Q6NV83		P29758
Q9D1C9		Q8BYI8		Q8C2E4		Q91VA6
P70387		Q9Z2B9		Q8VCH5		A0A7N9VR94
P17665		O35926		Q8K2C8		O08547
Q6PDE7		Q3TTA7		Q80YV2		P06801
Q8BWR8		Q80TN5		Q8C863		P46718
Q91Z96		Q9CY52		Q3UQ84		P59913
P06800		Q66L42		P70261		Q9CWJ9
P33587		Q8K4P8		O88533		O35345
P97864		Q80U19		Q8R0F6		P32233
Q0VEE6		F6W8I0		Q99L48		Q8BRT1
Q9D0K1		B2RXR6		Q9Z1Q5		Q9QZD9
Q6ZQL4		Q9WVJ0		P61759		Q64727
O54834		Q9WUC3		Q9CQ85		O70572
Q3UW53		Q8BGK5		A2RSJ4		O35250
Q9Z2E1		Q61410		P56528		Q91VU6
O70348		P97401		Q9QUG9		Q61543
P26150		Q3UHK1		Q3UMR0		Q9ESX5
Q91W59		P60191		Q6ZQ08		Q9DCA2
Q8BTR5		Q56A07		G3UW40		Q8VDC0
Q8BZ00		Q8BFU8		O35598		Q9CQN7
B2RT14		Q6NVG1		A2A8L5		Q61247
Q61559		Q9EQN3		O55125		Q921J2
Q3UZZ6		Q8C3P7		Q91YR7		Q9CRA5
Q9Z0H1		Q3U1V6		Q9WUD1		Q91Z67
Q61176		Q9Z0G0		Q7TSG2		Q9DAW9
Q9JKX4		A2A716		Q9D0I4		P06745
D3YW26		Q9Z1M0		P97333		Q99KQ4
Q68ED3		Q99J85		Q9R0P4		Q8CC88
O88783		Q6PDC0		Q9JMD0		Q3TIV5
A0A075B5M1		Q8BK26		Q9JKC8		Q5U458
Q5FW60		B2RW11		Q3UIL6		P35235
Q9D1G2		Q9CS74		Q99J83		P47811
P59729		Q61686		Q9D4V7		Q9QYA2
Q9JJA7		Q8BG16		O08579		O54786
Q99J87		P10853.P10854.Q64475.Q64478.Q64525.Q6ZWY9.Q8CGP1.Q8CGP2		Q8CCK0		Q9CZX8
P00375		Q80Y84		P70318		Q61166
P34928		Q9D4V0		Q9Z2V5		P34152
E9Q557		Q8BRG8		Q8CEC0		Q9Z1N5
O09012		Q9D924		Q8CJG1		P42227
P51949		Q3UDF0		Q8BHD7		P12970
Q80Y83		Q9QUR8		O89032		O55023
Q9R0E1		Q99PV8		Q78JE5		P62245
Q91V04		Q6PDJ6		Q6PFD9		P48771
Q8K3M1		O35304		Q3U0S6		Q68FG2
Q9WV03		Q61609		A2ADY9		P62242
Q8R1F9		Q61772		Q9CY57		D4AFX7
P98083		Q6ZPT1		E9Q6H8		E9Q6R7
O09173		Q8BXQ2		S4R1W5		P35550
Q9DBK7		Q3U5F4		Q61249		Q9CPV4
Q9CPW7		Q03146		Q99LC9		Q8BK63
Q571H0		B1AUH1		Q9WTX8		Q3UHJ0
P52792		P47743		Q5SXC4		Q9D8S9
P97376		Q8R555		Q3UNZ8		P08003
O89090		Q91V93		Q91YN5		E9QA15
Q8K339		Q9D7X1		Q8BG07		Q61187
Q8BNX1		P70188		O35465		Q9CZX0
O54782		Q80XD1		Q8CB27		Q60676
Q9CQ56		Q9JIB6		Q8C754		P16332
Q99PG0		Q60987		Q3USH5		Q61739
Q9QXV1		Q62442		Q8VCN9		Q9EPW0
Q5I012		P63056		Q9CQI3		Q8BTY1
Q8JZY2		O35710		Q9R078		Q8CHT0
Q9D2R6		E9Q7P2		Q8VC03		P62192
Q9D816		Q9CR27		Q14B01		G5E8K5
Q711T7		Q80WG5		Q62036		Q02819
Q8VCG3		Q8VEL2		Q3UH60		Q05512
Q8BG17		Q925N0		Q9WV02		Q8C854
Q99PE8		Q6NVF0		Q8R409		Q80TV8
O35309		Q9R020		P30681		Q99PV0
Q8K0G8		Q03517		Q8VDG3		Q9D051
A0A571BF69		Q6PHU5		Q8BYC6		P97823
Q9D8Z1		Q91YI1		Q6PGF7		P97807
Q80VI1		P63137		E9Q6J5		O55201
Q9CQW3		P39087		Q9CQ79		P62830
Q8BWQ1		P63250		P70460		Q6P3A8
Q8K441		Q91Z61		Q8R1A4		Q61425
Q9Z2Q2		Q810B9		Q3UMC0		Q9CXJ4
Q61712		O89084		P50172		Q8BJZ4
Q8R1Q9		Q9R0N8		P58462		Q04447
Q9DBT9		Q9JKK1		Q5XG73		O70251
Q8CD10		Q6ZQ93		Q9CPW2		Q9DBF1
Q9CYQ7		Q62288		Q8CJF7		P58771
P45377		P25785		Q810J8		Q6A4J8
P53569		Q8VEA4		Q80WS3		P01867
P53566		O35681		Q4ACU6		Q99JR5
Q8BTE0		P16388		Q3TX08		Q9ER88
Q9DBK0		Q8CBY3		E9Q7G0		Q8CHW4
Q3TJ91		Q8BPA8		Q99JI6		P58774
B2RT54		Q8C1D8		Q8VDZ4		Q8BY87
E9Q3L4		Q9Z2G0		Q91V09		Q64433
Q62311		Q8BQP9		Q9D903		Q9QYC0
Q3U962		Q8VIJ8		P00520		Q9D0I9
Q91WD4		Q811L6		Q3UMF0		P97384
O35945		Q8BHC1		Q62384		Q9QXK3
P61205.P84078		Q8R2U4		P58137		Q6ZWV7
Q7TMK6		Q9CWM4		Q8C5W3		Q9JKF1
O70281		Q8CC21		Q9D3E6		Q6PDQ2
Q504M2		Q6NWV3		Q9Z0R4		Q9JM62
Q8C5L3		E9Q9B3		P39749		Q8K2C6
Q64324		Q6P1I6		Q99N92		Q3UVL4
Q1ERP8		Q02105		Q8BK67		P46460
Q9CXK9		Q80XU8		Q08943		P56959
P98078		Q8BK75		Q8BX10		Q8K2K6
Q6A098		Q4KML4		Q8R2T8		Q91YJ5
P70255		Q3UCQ1		Q923B1		Q07076
P0DOV2		Q6P9S0		Q6NZM9		Q8R1X6
Q9CZU4		Q0V8T9		Q9CSU0		P62962
Q91WT8		P03899		P15208		P47802
Q99MZ7		Q7TSS2		Q920R0		P26638
Q8VC77		Q9Z2B2		Q501J7		Q9DCT2
P48437		P63087		Q80TE0		Q9DBL1
P27808		Q91VN6		Q9DC23		Q99JB8
A7MCT6		Q6DFW0		Q80X98		Q99L47
Q9D2D7		A2RT62		P04627		P63005
Q3SXB8		Q5SXA9		P59235		O55028
O88876		Q8BGQ1		P27600		O88448
P11679		Q9CQG2		Q8R3L2		Q99MN1
Q80UU1		Q8C8T7		Q6PEB6		Q91VR2
O08738		Q0P5V2		Q8JZZ7		Q6P542
E9Q6D8		P13864		Q3TKY6		Q9JJK2
Q8BWY7		Q9Z2E9		Q9R1J0		Q99LD9
Q91XC8		Q9D486		Q91VW5		Q9ESB3
B2RWS6		Q05860		Q91WB4		Q8BYB9
E9PYK3		Q3TXX3		Q9ESP1		Q6PDI5
P21440		Q8BGD5		Q3UMY5		Q9DBB8
Q80VP5		Q80U23		O54946		Q8C522
Q8K2Z2		Q9CVD2		Q9D198		P62301
P59048		Q8BXK8		P49935		P56695
Q8K2I9		Q9R0N9		Q99MP8		Q8BFS6
Q9R0E2		Q6PEV3		Q920Q4		P08249
Q6PD21		Q63850		Q8R2Y0		Q9CY58
Q9QXF8		Q8CD19		Q9QZ08		P50608
Q6IQX8		Q61625		Q8CIF6		Q9D0F3
TRYP		P63168		Q65Z40		P31001
Q9DBU6		Q5DTL9		P28230		Q62465
Q9D1B9		E9Q1P8		Q8BMP6		P57746
Q7TS68		Q8BXT1		Q8K4Z5		Q11136
O54824		Q9JJC9		Q61136		Q9CRB8
Q8VCG4		Q922H2		Q8R5K2		O55142
Q9QWG7		A2AHL1		Q60520		Q91X72
Q921Y0		Q5HZI2		Q99LB7		P63276
O35711		Q8BTV1		Q9D0M0		Q9JKL4
Q8QZR1		Q9ER58		Q80U78		Q60973
Q99N91		Q9JMF3		Q9EPU4		P47911
Q8C0C0		Q7TNR9		Q8CFV9		P19324
Q569X9		P22723		Q99N85		Q9Z0S1
Q8C165		Q9CWU9		O35114		Q9Z1B3
P43883		Q8BLJ3		Q7TQK5		Q62425
O08550		P70174		Q80XQ2		Q99KX1
Q8VDG7		A6ZI47		Q8VD65		P15532
Q8CIE4		Q8K377		B2RXS4		Q9JHI5
Q9D665		Q3V3R1		Q3UFS4		Q01730
P01592		Q6ZQA6		Q8K2C7		P25976
Q8BGS0		Q9D1K2		Q9R0A0		Q9Z1Z0
Q0VBD2		Q923X4		Q9DCT5		Q9JLN9
Q9WVA4		Q9CWF2		Q9CQY6		Q9CWX2
E9Q238		Q61831		Q8C650		P19253
P59242		Q5SP85		Q3TSG4		Q9D379
Q8VCC2		Q9Z1S3		Q9D2M8		Q9CQM9
Q99NF1		Q8K406		Q3TCJ1		Q80SW1
Q99J95		Q04690		O88291		Q99N87
P16331		Q8BGZ1		A0A286YCX6		Q8BIJ7
Q9JI10		Q922J9		P56960		P63073
A0A0G2JE99		Q9JMA2		Q9D9V3		Q9JHS4
Q9QYC7		Q6VH22		Q9DBU3		Q64442
Q9D0R4		Q8BGB5		Q8BXV2		P28661
Q60838		Q8BGR6		Q9QYE6		Q99LR1
Q9EQC1		Q8K0P3		Q99MU3		Q8K440
P11589		O08581		A0A087WQ44		B1AY13
Q8BTW3		A2APX8		Q9DCN1		P01872
Q5U5M8		O08908		P56213		Q8BKX1
Q6P6M7		Q3UR70		Q8VEK0		P52196
P19973		Q810D6		Q99KK9		Q9CQM5
K7N6C2		D3Z3Y1		P24638		Q9QYB5
Q8R0V5		Q64343		Q9WUP7		Q9JHW2
Q9CYH6		Q8BYN3		Q921I9		Q69ZR2
Q3UHX0		Q8VDP3		O88428		P32067
Q8VCR2		Q7TPD2		P26450		Q8BWY3
Q9D0B0		O88809		A2APY7		Q9JHK4
Q9DCE5		O70551		Q9QYI3		O08677
A0A0G2JG52		Q80TN7		Q68EF0		Q9D404
O08573		Q8BN59		P32883		Q62418
Q62187		P27048.P63163		C0HKD8.C0HKD9		P54310
Q8C0Q2		Q64362		Q80YR5		Q9Z1P6
P02301.P68433.P84228.P84244		Q9WTR1		Q7TNP2		O08539
Q924Y0		Q6NZL0		Q9CRD2		Q9D6J6
Q9CQL6		Q62018		Q689Z5		P45952
Q5FWI3		A2AP18		P98203		Q8BH95
Q6Q899		Q7TPQ3		E9PWW9		Q9ERS2
Q8BWP5		Q8VCV1		Q80U58		Q63844
P70694		Q8BKY8		Q00899		P01901
P10854.Q64478.Q64525.Q6ZWY9		O09126		Q9QZE7		Q8BTM8
P14901		Q3UMG5		Q3U319		P47963
Q99JR8		P80560		Q9DBE9		Q9D6Y9
Q76KJ5		Q6ZPR5		O54916		D3Z3N4
A0A0G2JDV3		Q8BGH7		Q924A2		P63037
Q99KS2		Q9QXG2		Q9JK48		P62717
G5E8Q8		Q9QZ05		Q8CD92		P20152
Q8VHG0		Q9DBX2		Q9QZD8		G3X8U3
P26187		Q8BX94		Q8CI33		P14152
Q64191		P51791		Q8CGF7		P14131
Q91VS8		Q60625		Q8R550		Q7TPR4
Q9CZJ1		Q6P3Y5		P59672		Q9DBL9
P04939		P04925		Q8C0I1		P99026
Q61666		O08842		O55176		P03930
O54750		Q8CBF3		Q8CDM8		Q9D710
Q14AX6		Q62141		Q6A0A2		O55106
Q6AW69		Q9Z0V2		Q60749		Q99L45
Q9CX97		O88444		Q9Z0H4		Q91ZU6
Q8BV49		P52734		O88325		Q9DB34
O35660		O88653		Q8CI75		P62849
Q9D8M4		Q50H33		Q8CDA1		Q9R0H0
Q3TNA1		Q62132		Q80W00		Q3UGC7
Q6NS46		P63141		Q9JHL1		P14148
Q62203		O70507		Q5NCF2		Q8CIH9
P49698		Q7TN73		Q922U1		Q9CY50
Q99MB2		Q6XUX1		Q8C0T5		Q811J3
Q8BKS9		Q4QQM5		Q9CX00		Q9QYR9
O88942		Q61851		Q99LI2		O09174
Q8K205		Q9ERN0		Q8VEE4		Q3UJB0
Q64261		Q8BZI0		Q7TT37		Q922Y1
O88856		Q3TIR1		Q80TY0		Q9D7B6
A0A075B5Q4.A0A075B5Q9		Q6P6L6		E9Q5K9		Q922D4
Q6NZL1		Q9WUE4		P14576		G3X972
Q91X44		Q99LG4		Q3THK3		Q99020
Q9WUU7		P16283		Q9D0D3		P97450
Q61268		Q8BHH2		Q5BLK4		Q9CPY7
P97302		Q9R0N5		Q6A026		Q9D6Z1
P63139		Q8C015		Q9JJF3		Q62419
Q8R2V5		P23819		Q61037		P21460
Q08024		Q8C437		Q9D4H2		Q9QZQ8
E9Q414		Q8CI61		E9PUR0		P48758
Q8CJF9		Q8K070		P57716		P97315
Q8VC28		Q811G0		Q7TSC1		P06151
F8VQG7		Q8CFE6		P35951		Q9ESE1
Q8VBW8		Q8BFX3		Q8BQ46		P02468
Q9EQF5		Q9CQL4		Q9CYA0		Q9Z2U1
Q810V0		Q3V0G7		Q6RHR9		P63024
Q8CG79		A6H6S0		Q7TSV4		Q60668
Q9DCA5		P28741		Q9R1S8		Q80TM9
Q8BWN8		Q8BHW2		B2RX14		Q9WVR4
Q3U0J8		Q64338		Q9CSH3		Q91WU5
O35423		Q8BJI1		Q80X82		Q8JZN5
E9Q394		Q8K337		P11881		P51859
Q9D6Z0		P56371		Q9D0L8		Q8R2Q4
A6H619		P97411		Q8BU88		Q91ZJ5
Q8BJ48		Q61616		Q9Z329		Q9D1A2
O55111		Q9EST3		Q9JHU2		Q9D753
Q9QWK4		O35474		Q8C5P7		P62996
Q8VCB3		Q80U40		P70122		Q9D7H3
Q8K157		Q9D2V5		Q9WTU0		Q3V384
Q9JHF5		Q9WVM3		Q61334		P09103
O08856		Q0KK55		Q9QXE7		Q8BHL5
Q6PCM2		Q7TPB0		Q64487		Q7TNC4
Q9JJN5		D3YTP3		Q924L1		O88487
Q07968		S4R2P9		Q6PAR5		P62751
Q69ZA1		P62069		P06797		Q60692
Q5YD48		Q9R0X5		Q9D8L5		Q9D7J4
Q91WN4		Q80XR2		P61022		Q80VP1
Q6WKZ7		O35231		Q99MR6		Q921G7
Q9CQA6		Q9EPN1		Q8BVI5		Q6ZWZ2
Q8R0F3		Q8CA95		Q8VD75		Q8CHU3
P11714		Q6ZWY8		O54931		Q8BH59
P58064		Q8BWT5		Q9D2N9		P50136
Q8BYZ7		Q80TI0		F8VPP8		Q9ERL9
Q8CG14		Q7TPS5		Q9QXN3		Q8VDM6
P23249		Q8BS40		Q8K2V1		Q3THS6
Q9QY30		Q922H9		Q9JLB2		Q80X95
Q80UZ0		Q91Y09		Q8K284		Q91W90
Q8CB77		P70205		Q00560		Q8VCM8
Q9CXF0		Q99N50		Q8QZV7		Q9CQH3
Q2EMV9		Q8VBY2		P24788		Q8BGW1
Q9EPQ7		Q5NCJ1		P57784		P29341
Q3U1C4		Q8CI96		Q3U1F9		P51125
Q5RKZ7		E0CYQ0		P97863		Q5SSW2
Q8BYU6		O88829		B9EJ54		Q9DCS2
Q9WU19		Q3UNH4		P97820		P11531
Q61508		Q6VNB8		Q91W43		Q9QY76
D3Z5G7		A2AIV2		Q9EPL9		P10630
Q8BHN1		Q80ZJ7		Q99KG3		Q61234
P11609		O88703		Q61490		P62960
O88833		Q9D9E0		Q9JI44		Q9ES28
Q8R4V5		Q8CGF6		Q3UY34		Q9D7N9
P12979		Q9D9S3		Q59J78		P61021
Q9WUH7		Q7TSZ8		E9Q512		P56135
Q9D6W8		Q69ZS6		Q9DAA6		Q9DCS9
E9Q5K4		G3UW60		Q69ZP3		Q64737
Q8CIH5		Q9JHR9		Q99JY4		P47738
O88947		Q8C8N2		Q91WI7		Q62417
Q9JKX3		Q9JHZ2		Q91WM6		Q05D44
P09803		Q8CE90		Q5DTM8		Q9D1Q6
P62254		Q3LAC4		Q91VN4		P62082
Q9DBB4		Q99NF2		Q8BUE4		Q64012
Q9EQ32		Q8BH70		Q9Z280		P40630
Q8BTW9		Q9DCF1		Q8CIV8		D3Z0M9
Q60596		P35969		Q9QYS9		Q9JI78
Q9CPT5		Q01341		Q6ZQB6		Q7TPV4
Q9QZH3		Q61701		O70152		Q80UM7
Q920A7		O35188		Q9CYS6		Q9WV54
Q9D826		Q8VD33		A2RSQ0		Q8K2Q7
P42209		Q80YA7		D3Z7Q2		Q8BRF7
Q9D142		O88741		O54988		Q80TL7
P16301		D3Z649		Q99KY4		Q9D711
Q925N2		P97813		Q3U2A8		P31786
Q99N84		Q9DB72		B1AZI6		Q9EP69
Q8K301		Q924S7		P17918		Q8R1Q8
Q9R1S7		Q9JKN6		B9EJ80		P31230
Q8VC12		O88307		O35144		Q9CR95
Q8R0F9		Q8VDH1		Q8C4X2		E9Q5C9
Q8VCB2		Q8R3E3		P97868		P35293
Q9WV70		Q9R0S3		P58058		Q60930
Q8C7Q4		Q6P1G0		P56212		Q9D338
Q91XT4		Q8BHR8		Q91Z38		Q6P1B1
Q8VDP2		Q3UH93		Q9JJT9		Q99LP6
Q80XC3		Q99K74		Q9R0I7		Q8BVG4
O89110		Q8R3H7		Q99LJ0		Q7TQI3
Q9D3P1		Q9JL26		Q2KN98		Q01405
Q8VCH0		Q0VBD0		Q6Y7W8		Q9CQ65
P70375		Q8BHN0		Q9D824		Q922B2
P45700		Q8K2J0		Q8R4H2		P36552
Q9JHJ0		Q8BGT0		P21271		Q9ERK4
Q8BXA1		Q99MR3		Q8C5W0		P61924
Q9D6J3		Q8K0F1		E9PVZ8		Q8BH64
O09158		Q80TL1		Q9JKF6		Q8BJW6
CASB		Q5EBJ4		Q7TNV0		Q9JLJ2
A0A1L1SSC7		Q9Z275		Q8R5M8		P35486
Q6ZQA0		Q09XV5		O08601		Q61704
Q99KW3		Q6PGF2		Q61503		Q60575
Q9JHH9		Q91VK4		O88874		E9Q0S6
Q62452		Q8CBX0		Q8BJU0		Q91VD9
Q9CZD5		Q62084		Q62245		P51881
Q3UCV8		D3YZU1		Q9D0D5		P67984
Q9DCV7		Q99K70		Q9DBC3		Q9DCU6
P41317		P55821		Q9CQH7		Q9CQW2
K1C15		Q60809		Q9R0Z9		P32921
Q64345		P12849		P51141		Q9DBN5
Q9CQ73		Q64689		Q3U0B3		Q91ZA3
Q9BCZ4		Q3UFQ8		D3YYY8		Q7TNL5
Q8BKF1		P70202		Q8CHG3		Q9CQI6
Q9D7Z3		Q80ZM5		O35218		Q9CX34
Q9CYX7		A2AKG8		Q8BLN5		Q8BGT5
Q8BJL9		Q9D8V7		P58044		Q9Z0N1
Q9QYY9		Q8R4C2		P01898		Q60605
Q7TMI3		Q80YA3		Q80WT5		Q7TQ95
Q9EPA7		P09242		Q6PGG6		Q9D0F9
Q8K1N2		Q99KN2		Q9WU79		Q99JW4
Q9CXA2		A2BE28		Q03958		Q8CI51
Q8VD31		Q8K348		Q9DB16		Q9CZU6
Q99J93		Q80W04		Q9JIH2		Q3UUG6
Q9Z2E2		Q8BZJ7		O08586		Q7TMC8
Q63961		Q9Z1W8		P35822		Q60865
Q8R4H7		O54818		P70388		P57780
Q8VCI0		Q61142		Q8K194		Q99PU8
Q497V5		Q8C817		P70340		Q9CZJ2
Q61694		Q9Z351		Q99NH0		P57759
Q8K182		A2ALS5		Q99M28		Q8VDP4
Q99KG5		Q9JMB8		P49070		Q9CZP5
P70665		Q8BVU0		P61148		E9PWR4
Q6PAC3		Q9R0N3		Q9CS42		Q8BMG7
Q9JIL4		Q8K135		P29533		Q9WUB3
Q91VC4		Q99KR6		P52293		Q8BHA3
Q0VAV2		P27671		P62627		Q9CQC6
Q6XBJ3		Q6PCZ4		O88351		Q64213
Q3UEI1		Q6P5F6		Q8VH51		Q62095
Q8BVD5		Q9DCC8		Q8BM72		Q9CQN1
P68372		A2A8L1		Q9QZH6		Q9DCD0
Q9CWT6		Q8BTU1		P70257		P45591
Q9JL15		Q5GH67		Q9DC33		Q9D8E6
		Q9D1N9		P52431		O88569
		Q9D6E4		Q9D1J1		Q9DCE9
		Q8CGK7		P08226		Q9D358
		Q68EF6		Q9EQC8		Q8VC30
		Q6NXK7		Q9JM96		Q6URW6
		Q8BG40		P97452		Q8CBY8
		Q8BHJ7		Q9QWW1		P62889
		Q8CA71		Q8K274		Q9D6U8
		Q9EP82		Q9QXE0		P80318
		Q9D3A8		Q9JJZ4		O54734
		Q8K093		Q99J36		Q91WQ3
		Q80TZ3		Q99LI8		Q99LF4
		Q3UYG8		Q80VC9		P84096
		Q61220		Q91YP2		Q64133
		Q8VD76		Q62383		Q8BMJ2
		Q6PD31		B1AY10		P84091
		Q9CZJ0		Q9JI39		P28474
		Q99K46		Q9EQJ9		Q71LX4
		P16951		O70311		Q61147
		Q5XJE5		E9Q2E4		Q9CXI5
		P61329		Q8BH57		Q6PER3
		Q6DID5		Q9ER00		Q9D5T0
		Q8CHT1		A2AJ72		Q9CRD0
		Q9JLY7		P06802		Q8BHG2
		Q9JIG4		P83093		Q8VE88
		Q6DID7		Q9DAW6		Q7TMB8
		Q6ZQH8		P61028		P40124
		Q9Z1S8		Q9EP71		Q91YP0
		Q8R3D1		Q921K9		Q8BK64
		Q8BQU6		P10711		P39054
		P51906		Q9D2R8		P97434
		P70414		Q921W4		Q9D023
		Q8BH47		Q9CWX9		Q8QZY1
		Q7TME0		Q9DBQ7		P47753
		Q9R1C6		Q91W92		P05202
		E9PYF7		Q9D6S7		Q60847
		Q8R071		Q8K2F0		Q64331
		P41234		Q8VD62		Q9EQ06
		Q3TY65		Q62523		Q9JIK5
		Q8CA72		Q8WTY4		P11276
		P22437		Q8BIQ5		P27612
		Q99P47		Q8BQ47		Q6IRU5
		Q8BHE3		O70172		O35226
		P60755		Q9QYJ3		Q7TNG8
		B2RXA1		Q9JHW4		Q5F2E8
		Q91ZT5		Q9CT10		Q9QYG0
		G3XA20		Q3UHC7		Q9Z1X4
		Q9ESM3		Q3TDN2		P61027
		Q61026		O54879		Q9DCT1
		P63046		Q9R226		Q61001
		P45481		Q99JX3		Q922F4
		Q922Q4		Q6P9Q6		Q99MK8
		Q8C0L8		Q9D1H6		Q80W22
		Q8BUM6		Q9WVD5		Q9JLT4
		O35409		Q6A0A9		Q8BZA9
		Q62507		Q9D773		Q8CGY8
		Q60780		Q80Y98		Q3UHX2
		Q8BQZ4		Q99N57		Q9QXS1
		Q6PAK3		Q7TPM9		Q99J47
		Q69ZK0		Q3TAQ9		P50427
		Q8CGE9		Q9ESU6		Q4VA53
		P49446		Q8K1R3		Q6P8X1
		Q99N11		P97819		Q9D8W5
		Q9ES89		Q920Q6		Q9CPU0
		Q8BFY6		Q61687		P70302
		E9PV86		Q8C052		Q99J09
		Q8BZ05		Q9CZL5		P05064
		A2ASZ8		Q8R3P0		Q9JLB0
		Q80VP9		Q78HU3		Q9CR16
		Q8CFV4		Q91XE4		Q8C5H8
		Q68ED7		Q91WJ8		Q9CPP6
		P53668		O54833		Q00PI9
		Q923L3		Q3UMB9		O70310
		Q9JJV5		Q8R104		Q9R1Z8
		P97772		Q99MD9		Q91YR1
		Q99J25		Q3U2I3		O54724
		Q3TNH5		Q62470		Q91W50
		Q9CZ16		A6H8H2		Q8K2M0
		Q8R332		Q8CFI7		E9Q616
		Q09LZ8		O88522		Q8BTJ4
		Q8CGM1		Q8VDG5		Q923T9
		Q6GYP7		P41105		Q6NZR5
		Q6P1D5		A2A484		Q91XL9
		Q7TNC9		P53995		Q8BP47
		Q99JP0		Q61464		Q3U2P1
		Q9CQA1		Q91YE7		Q9DBC0
		Q6PHS9		B1AR13		P35279
		E9Q4M0		Q9CSN1		P68037
		Q8QZV4		Q8VBX6		Q91YR5
		Q91VB2		Q61210		Q3B7Z2
		Q9CZP7		P56376		Q9JL35
		Q3TXU5		Q8BMI0		P61222
		Q8BHA1		Q6PB44		Q6PGC1
		O35709		Q8BG73		D3YXK2
		Q3UHG7		Q8K1C9		P61255
		Q80YE7		Q8CDG3		Q921H8
		Q6IR34		Q61216		P63328
		O08739		Q5NCR9		O88668
		P63166		Q91WG8		Q9D1P4
		Q8BNN1		Q68FH4		Q9R1P1
		Q80V42		O35166		Q9D1F4
		P05622		Q69ZH9		Q60710
		Q99NF3		Q9DBS5		P63001
		Q80T79		Q8CCB4		Q3THE2
		Q6RKD8		Q9JLQ0		Q9CPS6
		Q99LJ1		Q8K0L9		P63158
		P70265		Q8C570		P62342
		Q8CI71		P16406		Q8VDJ3
		Q69Z26		Q91X78		O70325
		Q3UFY7		Q9EP97		P45878
		A2AAY5		P61965		P07901
		Q8BM13		G5E8V9		Q7TN29
		B2RXC6		P35505		P39061
		Q4VC33		Q8C181		Q80ZX0
		Q922L6		Q5F285		Q8C7H1
		Q3TWN3		Q80U72		P50518
		Q6ZQ29		Q8BFU3		O54984
		Q6P9J9		Q6P9R4		O88851
		A6H8H5		Q8R3K3		O54774
		Q8JZP2		Q8K2F8		P42208
		Q3UF64		Q8CFE4		Q63932
		P41778		Q8R035		Q9CY27
		Q8C008		P19426		Q9WTM5
		E9Q8I7		Q91YJ2		P84099
		Q80YD6		Q8VHR5		P09055
		Q9WTS2		P08101		O55234
		P33175		Q9JMD3		P42567
		P97492		Q8K245		D3YZZ5
		Q3TPE9		Q9Z2D8		Q9DCX2
		Q9Z0F8		Q8CCS6		P31938
		Q8R554		Q8K2Q9		Q91V12
		B1AWN6		Q06180		Q9DBG6
		Q8BVL9		Q3TYA6		Q8BT60
		Q9QX60		Q3UQ44		P97300
		P21447		Q9Z160		P07309
		Q9EPQ8		A0A286YCV9		Q8K0Z7
		Q9CRC9		Q3TDD9		E9Q411
		Q8VCC9		Q80X81		Q4KMM3
		Q8C6E0		Q0VBL3		Q8K268
		Q6S5J6		G3X9K3		Q6P5F9
		Q499E0		A2BDX3		Q3UM45
		Q8BPU7		Q8CH25		Q8CIN4
		P48381		Q9D281		Q9JLV5
		Q8CCJ9		P08775		Q7TMS5
		Q99KE1		Q9Z247		Q7TMY8
		Q8BX80		O88952		P63325
		E9PZ19		Q3UQN2		Q9DB05
		Q9DBR3		Q78JW9		P21279
		A2AJW5		P46467		Q9WUA2
		O35633		Q8BIL5		Q99KV1
		Q3UE31		Q04207		Q9JHU4
		Q8BGN3		Q0VGB7		Q8BZ98
		Q91V36		Q8BWU5		Q6NSR8
		Q8BGE6		Q3TKT4		Q91YI0
		Q7TN83		Q8K009		Q62348
		Q8VCE6		Q9WUB0		Q9QUM9
		Q80U35		Q8VE47		Q6ZWN5
		Q8BXR5		Q8K3G5		F8VPN4
		Q8BGR2		Q9JLV6		Q9CQX8
		Q8R4F1		Q9Z0S9		P62259
		P63089		Q91YL3		P61087
		O88697		Q91WK5		Q921T2
		Q920N7		Q9JMC8		Q8BX70
		Q8BSL7		P18052		P80315
		Q7M753		Q8BKC8		P10637
		Q924K8		P23591		Q99KK2
		Q6A058		Q80X41		Q9EQQ9
		O08747		Q3U186		Q9R0U0
		Q6WQJ1		Q91VE6		Q9DB90
		Q9CS84		Q99K01		P58252
		Q3U5C7		Q99ME9		Q9CPR4
		Q8BKR5		P25911		P80317
		Q61024		Q9QZS3		Q9Z1P7
		Q80TE4		Q6DIC0		Q9CXZ1
		Q69ZU6		Q70FJ1		Q99K28
		Q5SSL4		Q925B0		Q9R0P3
		Q8C0J6		Q3URQ0		Q8BVW0
		Q9WVL1		Q9D7P6		Q6P5E4
		Q9R1E6		Q9QYF1		Q3TZZ7
		Q99PH1		Q8BH74		P20918
		Q8BMG8		Q8BFR4		Q6Q477
		Q99JH7		P42128		Q8BIJ6
		O89050		Q8BH60		P27641
		Q8BNY6		Q6P6J9		P97855
		Q922H1		Q9D0C4		Q01768
		Q5U4D8		Q6PGL7		Q8K183
		Q3TYD6		Q5SSZ5		Q9D8W7
		Q8BZ60		P70303		P70372
		E9Q4N7		P49962		Q9JK53
		Q3URF8		P63280		Q8VCT3
		Q9WUD8		P97352		Q8BGD9
		Q3V1U8		Q8K124		O88543
		Q80Y50		B2RQG2		Q8BGU5
		Q99K10		Q64674		Q9CRB6
		Q9CTG6		O70252		Q8BML9
		E9Q401		E9Q634		Q8BSY0
		Q8C145		O35604		P70297
		Q99PI8		O88532		Q3ULF4
		P56387		Q01147		Q9DC70
		Q80XP9		Q8BVA5		Q8BX02
		Q9Z2C4		P18653		P10852
		Q921Q7		Q7TT50		P18760
		Q9WVK8		P35821		Q80UJ7
		Q61315		Q8BL74		Q99KR7
		P62484		O88643		P42932
		Q6P2B1		Q80WC7		P59759
		Q810B8		Q8BGT7		Q9WTQ5
		Q8CIQ7		Q8R2U0		Q9CYG7
		Q9JIS8		O35386		Q8BH04
		P11835		Q99NH2		P97371
		O88704		P61967		Q8C2Q3
		Q8CEI3		Q9WTX2		Q62351
		E9PYL2		A2A7S8		Q62318
		P08414		Q80U49		P35278
		Q5SVL6		F8VPU2		Q8CI94
		Q9WUA6		Q8BJU2		Q9DCL8
		O70405		A2AHG0		Q9EQP2
		Q8K3I4		Q8K019		Q99KF1
		Q8CJ40		Q80U87		Q61656
		Q91YH6		Q9D7S7		P46664
		Q925J9		Q3TC33		Q8JZQ9
		Q9QZD4		O35326		A6X935
		Q640R3		Q61194		Q9D2G2
		E9PUL5		Q04750		Q9QY81
		Q6P2K6		A1L3P4		Q9R0N0
		Q3UHU5		Q3UVU3		P54823
		Q6A065		Q8K3Z9		Q9D2V7
		Q9QZM0		Q9DC28		Q3V3R4
		Q8BHF7		Q9D706		Q6KAR6
		Q91W96		P35831		P56812
		Q3UHB8		Q8BKE6		P10126
		Q80ZJ1		Q80XA6		Q9WUM3
		Q6PHZ8		Q99NB8		P08113
		P70451		Q6P5H2		Q9DBR7
		Q9D0B6		P46062		Q8C166
		Q8VHK5		E9PYG6		Q61584
		Q8BG94		Q3UU43		P26231
		P28571		Q9DBR1		O35381
		Q8VI24		Q6NS82		Q3UDE2
		Q9ERS5		Q501J6		P48678
		Q5S006		Q9CPW4		A2AJI0
		O55236		Q8VHI3		Q00519
		Q3U3E2		Q9CR51		P99027
		Q9D1T0		Q99JX7		Q69ZS7
		Q3UYH7		P35922		Q9QUR6
		Q61627		Q8C5Q4		P58389
		P61460		Q9DAU1		Q3UTJ2
		Q60610		Q3TRM4		P14824
		P68500		Q8VD04		Q6GQT9
		Q9JLC8		Q91W86		Q99PL5
		Q3TZM9		P70313		Q9Z1Q9
		Q5DTN8		P28843		Q9Z0J0
		Q921C1		Q69ZZ6		P28656
		O88907		P56379		Q9D4H1
		Q8BLC3		Q9R099		Q99KP6
		A2ACQ1		Q99LC2		Q64521
		E9PXF8		P28651		Q9ET01
		Q63912		Q9WVJ3		Q9QXK7
		H3BKQ3		Q9R060		Q99JY9
		Q80XC6		Q8CIF4		Q64514
		P19137		Q80U93		P59017
		Q61923		Q8BVU5		Q8BGH2
		Q3UN16		Q8CFQ3		Q9Z1G4
		P35285		P62311		P16546
		Q03717		P54797		Q9WV60
		P42337		O88343		Q9ERG2
		Q80U56		Q3UJU9		P50247
		Q9WTS6		Q8BPG6		P17426
		P70232		P70677		Q9EQH3
		Q8VEF1		Q9Z1M8		O08810
		Q8QZT2		Q8BKI2		Q8CIE6
		Q9WTS4		Q9D883		P61202
		Q80YS6		Q9DBY8		P0DN34
		Q6PFX7		Q05CL8		Q91WM1
		Q7TN99		Q9EQ61		Q9WVQ5
		O08989		Q8K327		Q9JJL8
		Q65CL1		Q9CZU3		Q923D5
		Q80TG9		P41241		Q8R016
		Q9DCB4		Q91WE1		O88967
		Q8CHG5		F8VQ05		P97461
		F6V035		Q7TPD0		Q9Z2A5
		Q8BGT1		Q9EQC5		P10605
		Q9D3A9		Q9JMG7		P68368
		Q8K0T0		Q8K4R4		Q6P9R2
		A2AR50		Q6A028		Q9DBG7
		P46662		Q6Y685		P53026
		Q8K3I9		Q9Z210		Q9D1G1
		Q8K1L5		Q9CQV7		P17710
		Q8C5L6		B9EKI3		P58871
		Q8C0Q9		Q8BGF9		P47757
		O08576		Q9WV68		Q68FD5
		Q8VEG4		P97770		P08752
		E9Q3M9		Q9R1C7		Q6PA06
		O35316		Q3UEB3		Q68FF6
		B2RXS3		Q9CXE7		Q8BIW1
		A2A432		Q9WVS7		Q9JL56
		Q8CIP4		Q8VE19		O88738
		Q9Z2V6		Q9CQK7		Q61316
		Q5DU02		Q64520		P70697
		Q9R0C8		Q8C3X4		Q80XL6
		Q9Z1B8		B2RXC1		Q14C51
		Q32NY4		Q3TQI7		P15379
		Q8QZS3		A6H611		Q810A7
		Q6ZPR4		E9QAT4		Q80WQ2
		E9PYR1		Q922K7		P49442
		Q62413		Q3UFK8		P54731
		Q9D6P8		Q8BVL3		Q8C7R4
		Q7TSH8		P56183		O08582
		Q8CFN5		Q5ND34		Q8R5H1
		Q5DU25		Q8K4Q0		Q9Z1K5
		Q925H0		Q8BSE0		O35071
		O70433		Q9CW79		Q01853
		Q9ESK9		Q921L5		P51410
		Q8R0S4		P43406		Q3U5Q7
		Q9QXA7		O70566		Q9D832
		Q5F4S8		Q04519		Q9D6Y7
		Q6NXL5		P16460		Q99M87
		P55288		Q91ZW3		P63242
		Q3U213		Q99MI1		P12367
		D3YZI9		Q9JI11		Q8BUK6
		Q91YN0		Q3UFF7		Q3TXS7
		Q7M6Z0		Q8BGV0		O35737
		P11627		Q9DC51		Q91YM4
		Q8BTY2		Q99LI7		Q99K48
		Q8BXC6		P61458		Q71RI9
		Q9Z2W8		Q8BRN9		Q9JIY5
		Q9JII1		Q9CYA6		Q8VCW8
		Q61016		O88811		P46638
		E9Q6Y8		Q91ZR2		Q99K51
		Q3TLS3		Q3USJ8		Q80XI4
		Q61290		Q61211		P62754
		Q02384		O08784		P47758
		P05555		Q9R0M6		Q6ZQ58
		Q9D4F8		Q2PFD7		Q9DBE0
		Q3TWL2		Q8VBT0		Q99LE6
		P59823		Q9R013		O70133
		Q14CH0		Q6NZN0		Q6WVG3
		Q69ZK9		Q80Y81		Q61879
		Q7TPV2		Q8BSQ9		P11103
		Q80U30		Q9D394		Q8K4G5
		B9EJI9		Q99JF8		P47934
		Q6NSQ9		G5E897		Q9CQV8
		Q80WM5		Q9WVA3		P10833
		G3X9N3		Q8VEB4		P24549
		Q8BLK3		O70585		P01027
		P50586		O88384		Q8BJS4
		Q7TPD3		Q62159		Q9QUH0
		Q9D387		Q61129		Q9ES74
		Q9D2D9		Q8C0M0		P70441
		Q5XJV6		B2KF50		Q9QXS6
		Q9CR39		Q61189		Q01279
		Q8K596		Q8BHC9		Q3UPL0
		P54754		Q8K3A9		Q8BZW8
		P61620		O88983		P70336
		O70340		P61963		P17742
		Q9D428		Q9D5J6		P17156
		B1AXV0		Q02780		Q9JKR6
		E9Q1M1		Q9Z315		P12815
		E9Q8V6		P21995		Q8CC35
		Q02956		Q61730		Q9WUQ2
		Q9D8B7		Q9R257		Q9WV32
		Q3TY86		O08992		Q9JII5
		G3X9J0		P63154		Q9CQD1
		Q3UMF9		Q7TQG1		Q3TGW2
		Q61361		Q1HFZ0		Q61292
		Q5DTX6		Q3TPX4		P37040
		Q3U0K8		P11930		P09411
		P39038		Q99K30		Q01339
		Q9R1V6		Q8BXN7		P46471
		Q80TE7		Q52KI8		Q2TPA8
		P51569		Q6PJN8		P47791
		Q62074		Q8K1N1		P61358
		O88845		Q9DB30		Q3ULJ0
		Q5SYL3		Q8BP56		Q9CXR1
		Q9JME5		Q6PDH0		P62196
		P70392		Q8C0J2		P35979
		Q8C547		E9QAE3		Q3UHD6
		Q8BTF8		Q61550		Q8BYH7
		Q9Z1K7		P97825		Q9D8T7
		Q921G8		Q3TC93		P24547
		A2AHC3		Q9JM13		Q6PHN9
		Q8CIV2		Q9D6T0		Q61035
		Q6RI63		P83870		Q8K310
		Q8K2I1		E9PX68		P46061
		Q8CIM8		P62257		Q8CBW3
		Q9JKD3		Q8JZX4		Q91VM9
		Q8VHQ3		P54729		Q8VIJ6
		F8VPZ3		P53702		Q8BH61
		Q3TES0		Q6PIP5		Q8BHN3
		Q61324		Q9Z1T6		Q923D2
		Q8BV13		Q8VDW0		P46935
		Q8CHE4		Q9CWN7		O70492
		Q6PDI6		Q6PAJ1		P68040
		P15209		Q8CCP0		Q9R190
		Q8BM85		Q8R0H9		Q9R1P0
		Q69Z98		Q6PIU9		P14115
		Q9Z2C9		Q921M4		B9EJ86
		Q9ESJ1		Q569Z6		P62897
		Q80TL0		Q3UMT1		Q921F2
		Q80ZX8		Q9JLM9		Q9Z2N8
		Q812E0		P58404		Q6PB66
		Q8CI03		Q9DCR2		Q99J77
		Q91UZ5		Q6ZPS6		Q61081
		E9PX29		P28659		Q99L88
		Q9JHI7		O08583		P54728
		Q91YL2		Q80ZI6		P97927
		P26049		Q69Z99		Q61033
		Q01815		Q640M1		P16858
		Q8BIF0		Q68FH0		P60122
		Q8CAB8		Q6PAM1		Q8BFZ9
		Q80Y24		Q8R3S6		P14685
		Q6NXK8		Q91XU0		Q8BMK4
		Q5U4F6		Q61074		Q9Z321
		P43300		Q3TIR3		P40142
		Q9WV91		Q99MJ9		O88587
		Q5Y5T5		Q80Y55		O88844
		Q60900		P51655		Q9JJ28
		Q8BPN8		Q9DCP2		O88531
		Q8C7K6		P31649		Q3U0V1
		Q924N4		Q8BX90		P43277
		B1AWC9		Q8BYW1		O35551
		A2A6T1		Q80YD1		Q3UJB9
		Q80ZD8		Q8K382		Q6DFW4
		Q8C033		P70335		O09111
		Q8VHI6		P32507		Q9D1D4
		Q62083		E9Q3G8		P28653
		Q9CWQ0		Q91VH2		Q9Z1D1
		Q8R1Y2		Q9CQ22		P62315
		Q9R0M0		Q9D7N6		O55229
		Q69ZF7		Q8BUY5		P97370
		Q9JL04		Q569Z5		Q9WUL7
		O08688				P50516
		Q80ZU0				P11983
		Q8VCM5				Q9JI75
		Q8VEH3				Q8VDM4
		P57722				Q9CQU0
		Q14BB9				P24369
		Q3UZV7				Q8K2B3
		Q9CYI0				P17047
		Q8VCZ6				Q9CZW5
		Q80ZF8				Q9CR00
		Q3UHE1				P47962
		Q8BLY3				O08749
		P38585				P59325
		D3YVF0				Q6ZPZ3
		P48320				Q61335
		Q8R1F1				P61161
		Q61120				Q8R050
		Q3UA37				Q922J3
		Q7M759				Q61411
		Q07646				P07310
		Q4V9Z5				P62334
		Q18PE0				P26041
		Q3U0D9				Q9CXW4
		Q812A2				Q9WUM4
		Q9CQE5				E9Q9B7
		Q8VEL9				Q3TCH7
		Q923M0				P00493
		Q6NS52				P60335
		Q8VE92				P80316
		O35393				Q9CR57
		Q9DBH0				P53811
		Q8BXR1				Q8BLF1
		Q9Z103				Q91VJ4
		Q76LL6				Q00623
		Q6PNC0				P46735
		Q8K3G9				Q8BMJ3
		Q62443				P00405
		Q3UYC0				Q9D855
		Q8BL48				Q8R0F8
		Q0KL01				P15116
		Q60943				Q9WTX6
		Q8BGT8				P10518
		Q9ET43				P63017
		Q8K285				Q8BVY0
		P56394				Q99P88
		Q8K1S1				Q14DH7
		Q8K031				P42669
		Q3UGY8				O08788
		Q45VK7				Q8BP48
		Q3UR50				Q811D0
		Q8CC27				P51830
		Q9ERA0				Q93092
		Q9R194				Q9WU78
		Q9R0D8				P17182
		O35449				Q9QYB1
		Q69ZW3				A2AQ25
		Q80Z10				P11352
		P98195				Q9D8N0
		Q14BI2				Q91VF2
		Q3UUJ4				Q9D273
		Q3UXZ9				P53994
		P0C7M9				Q80VL1
		E9Q777				O55135
		Q5SUQ9				Q8CJ19
		Q61282				P61922
		Q3UGX3				P43274
		Q91VR8				Q02053
		Q14B80				Q80VD1
		O88998				Q9D554
		Q7TNM2				Q9ERU9
		Q8BS95				O08663
		Q9JJR8				Q9Z2U0
		Q5PR73				Q8VBW6
		Q922R1				P70670
		Q60996				Q505D1
		Q149L6				P17225
		Q3UTQ8				Q5U3K5
		Q9D666				Q9R111
		Q8CCX5				Q9WVT6
		B0V2N1				Q7TMM9
		Q7TPH6				Q8K0D5
		Q8VHW2				Q8R086
		Q920P3				P23116
		P62715				P48036
		P39688				Q9EP72
		Q64096				Q80Y14
		O35621				Q9CR09
		P29387				Q99LC5
		Q80T41				Q3URE1
		P70206				O70591
		Q71B07				Q9EPJ9
		Q6ZPF3				Q8K021
		Q149F1				Q03141
		Q8BG89				Q9JMA1
		Q3UHD1				Q6PF93
		Q91WG5				P32261
		O35454				Q4VBD2
		Q8BNA6				Q6NZC7
		Q6V4S5				Q8JZQ2
		Q91WE2				Q64010
		Q9WU22				Q922P9
		Q6PB70				Q9JHR7
		Q8BYK5				P04186
		O08800				Q9JKY5
		Q80WT0				Q9Z204
		Q5U4C1				Q91WS0
		Q8K448				Q9CYR6
		A0A0N4SVF2				Q91ZV0
		Q810U4				Q8K2H2
		Q9D415				P24452
		Q9CWR0				E9PWQ3
		P97496				Q80UY2
		Q6NXM2				P47754
		Q8C6B2				P15105
		P62881				Q3UJD6
		P98156				Q99KB8
		Q8K209				Q62188
		B1AS29				Q9CZ44
		Q9QZI9				A2ASS6
		Q5RKR3				Q8VDN2
		Q80UG2				Q99NB9
		E9Q8Q6				Q9CY64
		Q91ZH7				Q8K3H0
		Q8R395				P70699
		Q8QZY9				P35585
		Q99K24				Q9CZ30
		Q8VHJ5				Q8K1M6
		Q641K1				P19536
		P35803				O09061
		A2RSX7				Q810B6
		E9PZP8				P16254
		Q01065				P36916
		G5E8G3				P09671
		P35290				Q8VEK3
		Q3UHI4				Q922R8
		P20352				F8VQC1
		P70211				Q6PHQ9
		Q8CBC4				Q60598
		Q5QNQ6				Q9D8Y0
		Q8C996				O88342
		Q9Z218				Q9DBG3
		Q9DBX3				Q6A068
		Q9Z0L0				P05132
		Q80TQ5				O89053
		Q80Z24				P09405
		P16054				Q9D7S9
		Q8R349				O08808
		Q61330				P34914
		E9PY16				Q91YW3
		P28828				Q9CYZ2
		Q5DU41				Q3UIX4
		Q6P5U7				P51432
		Q8CF66				Q99K23
		P50571				Q64511
		Q811C2				P57776
		O35136				Q8BRK8
		O08644				P35700
		Q61771				Q8R0Y6
		Q8C170				Q9DCZ4
		Q3UYV9				Q6ZWX6
		Q9QYF9				Q9R0P6
		Q3TLI0				Q8CGA0
		Q99M01				Q9QYI4
		Q9D4C9				Q9CQA3
		B0F2B4				Q9JMH6
		Q99JP7				Q8BZZ3
		Q3UHD2				O35643
		Q64373				Q9WVG6
		Q99J10				P21981
		Q8C0Y0				O09164
		P61215				Q9QUJ7
		Q61161				Q05793
		Q80TS3				P61089
		Q0P5W1				Q91VH6
		Q3TVA9				Q8VHM5
		P08046				O70318
		Q8VEM1				P42232
		Q9QX66				Q99MN9
		Q8CB44				Q8VEH5
		Q99MR1				Q9CXW3
		P48542				Q9CR61
		B1AXH1				P17751
		Q9D164				Q9DCN2
		B9EKR1				Q91XD6
		Q91V24				Q8C0C7
		P59326				Q99MR8
		Q9JME7				Q9QZQ1
		Q8VHY0				Q921F4
		B8QI36				Q8K1A6
		Q9D5R2				P97351
		Q9WV76				Q8R146
		P61294				Q91VR5
		Q08331				P80313
		Q62148				Q3TC72
		Q925T6				Q8C1A5
		Q7TN74				Q91YQ5
		P63248				Q922D8
		Q3UHD3				Q3TEA8
		P48543				Q8BI84
		Q8BTZ4				Q9QYJ0
		Q8JZP3				P43275
		O88485				Q9QX47
		Q91ZR1				P61164
		Q8BHI4				Q9CXF4
		Q3U1Y4				P62858
		Q9ESN4				P18826
		Q9JMF7				Q3THG9
		Q9D2E2				Q80YV4
		Q8BLE7				O08709
		Q3ZK22				Q5U430
		V9GX34				Q921M3
		P55144				Q8CAK1
		Q8C4G9				P60843
		P70399				Q3URD3
		Q922G0				Q6PDL0
		E9Q271				Q99KJ8
		Q5HZI9				Q3TMH2
		Q91V83				Q61768
		Q3UE37				Q61733
		O70354				Q6R0H7
		Q9CQV6				O08756
		Q91ZU1				P97429
		Q9CZN4				O55131
		E9PY46				Q8VCF0
		P23818				Q6PDG5
		Q3URE9				P99028
		Q8VDN4				P22907
		Q8BIZ1				Q8C0M9
		Q6P9K9				Q8VE22
		O88939				Q8BQM4
		P23242				Q80U63
		Q61626				Q9Z2Z6
		Q9QXL1				Q920E5
		Q80YF9				Q04857
		Q3UHK6				Q62167
		M0QWN7				P25444
		Q9D1E8				Q8VDC1
		O54829				P11087
		O54990				P21614
		D3YUB6				P30999
		Q9D6D0				O35887
		Q8CBH5				Q9EPC1
		Q8CFJ9				Q3TFQ1
		B5TVM2				Q9Z2M7
		Q80Z38				Q9CZM2
		Q99P58				Q8VI36
		Q8BXJ9				Q8BW75
		Q8BHZ0				P97494
		Q9ER47				P55302
		E9Q9K8				B2RY56
		Q9D8N2				Q8R0S2
		Q99J31				Q8R1V4
		P0DW87				P97449
		Q8BXA7				Q91V41
		P70208				P51660
		Q3TY60				P68181
		Q9D6F4				P97372
		Q5DTY9				Q8VDQ1
		Q9JJA9				Q3U487
		Q8CH09				O09131
		Q9JJY4				Q99JI4
		O35954				Q9R1P4
		Q5DQR4				Q9R0P5
		Q8BHY8				Q8BGQ7
		Q8R4V2				Q61655
		F7BAB2				P56391
		P97493				Q9QZE5
		Q9QYE9				Q80X90
		Q99KL7				Q9DD18
		O35127				P48722
		Q14BV6				P28740
		Q6PHS6				Q9CU62
		Q5SVQ0				Q9R1T4
		Q61624				P70333
		P59279				Q8CCJ3
		Q9WV18				Q3TJZ6
		Q8BGA3				Q11011
		Q8BH48				Q60931
		Q6NXJ0				Q61990
		Q8R3T5				Q06185
		Q9DCI3				P52480
		Q00558				Q91WC0
		Q8BGG7				Q8BGF0
		P05532				P62317
		P54818				P97379
		A6H5Y3				Q62186
		Q8VHN8				P28271
		Q1HKZ5				D3YZP9
		Q7TSH6				A2A8Z1
		Q8CE50				Q9CWS0
		Q9Z1W9				P61982
		Q9D850				Q78IK4
		Q6I6G8				Q91V92
		Q9Z188				Q9WV80
		A2RS43				P56395
		Q9R0L7				Q61233
		Q9JJY3				Q78PY7
		Q5DTT2				Q9CVB6
		P35436				P35282
		Q8BGX3				P62911
		P97326				P97290
		E9Q8I9				Q62261
		Q7TPM6				P12787
		O54965				Q99KN9
		O88705				P19783
		P16390				P47857
		Q9JLM8				Q9Z1Z2
		Q922X9				G5E829
		P54763				P05201
		Q8K224				P54775
		P97291				Q8BWZ3
		Q8BR63				Q02788
		Q80Y56				P26043
		Q52KF3				P52760
		Q8CE33				Q60823
		Q9CY18				P68254
		Q9QXW2				Q5SYD0
		Q9JLC4				Q921I1
		Q9R087				Q60902
		Q9ER64				Q9D7X8
		Q8C4Y3				Q68FL6
		Q91W53				Q6P4T2
		Q9WTN0				Q9Z1R2
		Q8VHH7				Q9DBC7
		Q8BGZ4				Q8BWG8
		A2A690				Q8BVI4
		Q8BSS9				P43276
		Q99LS3				Q7TMK9
		Q6GQW0				O35685
		Q9DAM7				Q9CPQ1
		Q61423				B2RQC6
		Q8BIK4				Q9WTR5
		B2RUJ5				P62855
		Q810B7				Q62376
		Q8VI59				Q9ER72
		Q3UTH8				E9PYF4
		Q9JJD0				Q8VI75
		Q6ZQ03				Q9JMC3
		Q60700				O35286
		Q6VNS1				Q9JMH9
		Q8K2D3				P61979
		Q9DC53				Q3TB82
		Q923U0				O88685
		Q8BVG8				Q8CJG0
		Q07409				Q9EP89
		Q8BNU0				O70589
		O55013				Q8VDD5
		Q1RLL3				Q9CQF9
		Q8CHG7				Q9D0E1
		Q60751				Q570Y9
		Q91XM9				Q99LX0
		P0C192				Q9CQT1
		Q61164				P19221
		F8VQK3				Q9JLI8
		Q8BJ42				Q6ZPE2
		Q91WG4				P26516
		Q91Z69				O35382
		Q6ZPQ6				Q8BVQ5
		Q8BZB3				Q9CQX2
		A2AG50				Q60864
		Q9EQZ7				Q8QZR5
		Q4U2R1				Q9CX86
		Q91V57				Q8JZN7
		Q9D1K7				Q91W89
		A2ALK8				Q62448
		Q811Q9				Q9R112
		Q9WTS5				Q99KK7
		E9Q6C8				P13707
		Q62178				Q9WVK4
		Q9JI90				Q9Z0R6
		Q6PGN3				Q8BJ71
		Q8BVP5				Q9DBG5
		Q8VEB6				Q3U7U3
		Q571I4				Q9QZX7
		Q6ZPY2				Q8K010
		Q8VI56				E9Q3C1
		Q9JJE4				P97822
		Q923W1				Q61749
		Q8BNW9				Q9R0Q6
		Q64336				Q62446
		P52912				P21278
		O35495				P36993
		A0A2R8VKG2				P54726
		Q9JIP6				P39447
		Q8VI51				Q3U1J4
		Q9Z1S5				Q8CIB5
		O08648				P62702
		Q6ZQ18				P26883
		Q7TQK1				O08553
		Q80U04				Q99KC8
		Q91VH1				Q99KR3
		Q9EQS9				Q8C0D5
		Q6NSW3				Q9JIF7
		Q8K386				Q07797
		Q52KR3				P24527
		Q9DC04				O70435
		P63034				Q9D8U8
		Q9Z268				Q9EQU5
		Q9JJ43				Q922E4
		Q0GA42				Q6ZWV3
		Q6PDS3				Q9CXY6
		Q80X68				Q9QXZ0
		E9Q5M4				Q9Z2D6
		Q3UTZ3				Q99M04
		O35375				Q8CIG8
		Q8C1W1				Q7TQD2
		Q8CCJ4				P20029
		Q9EQF6				O70493
		Q80XG9				Q9QXL2
		Q8BJH1				Q8BU33
		P63080				Q9JIX8
		Q9WUT3				Q9Z2I0
		Q9EQC0				Q9QXG4
		Q9D938				Q9D5V5
		Q4VBE8				Q99LB2
		Q8BLN6				Q8R1G2
		Q80VQ0				Q9ESW4
		D3Z286				P23198
		Q9R1K9				Q9EPU0
		Q9R0G7				Q78ZA7
		Q8K4Z0				P26369
		D3YXJ0				O88322
		G3X9X1				Q8CHC4
		Q8BKX6				Q9CQE8
		Q9DB43				Q9CZD3
		P49025				Q5XJY5
		Q8BT14				Q9D024
		Q91YQ3				P27773
		Q9CXV1				Q3TL44
		Q8BWY4				P14869
		Q64455				Q9CYH2
		P0C673				P99024
		O08848				Q9JJI8
		Q9Z1L5				P52479
		Q8BLR2				P50580
		Q8BLU0				P53810
		Q5SNZ0				P49443
		Q9ERZ3				Q9CW03
		Q8R4E6				O08638
		P62080				A2AGT5
		Q8BUY8				P62821
		Q61165
		Q8VD63
[truncated: 386 more rows]

## Sheet: Liver+Muscle+Cortex_Common DEP
	Liver	Muscle	Cortex
	SERPINA1C	SERPINA1C	SERPINA1C
Sample	Q00896	Q00896	Q00896
Group1_1	24.244	23.683	21.9058
Group1_3	24.0887	23.5433	21.4278
Group1_4	24.6831	24.1154	21.801
Group1_5	23.9312	23.5529	21.8559
Group1_6	24.9763	23.1594	21.9531
Group1_7	24.6713	23.3229	21.5448
Group1_8	25.6058	23.612	21.4076
Group2_2	25.4556	22.9294	21.8906
Group2_3	25.3245	23.6098	21.3097
Group2_4	25.0918	23.3059	21.0819
Group2_5	25.6399	23.5147	21.2121
Group2_6	25.3854	22.538	20.5889
Group2_7	25.0458	22.8826	20.44
Group2_8	25.5768	22.6527	21.5182

## Sheet: Common DEP
Liver only	Muscle only	Cortex Only	Liver+Muscle only	Liver+Cortex only	Muscle+Cortex only	Liver+Muscle+Cortex
P62743	P50446	Q9D1G3	P46978	P60824	Q99LG2	Q00896
P63260	E9Q0F0	P35441	Q9CZN8	Q8BY89	Q9JL35
Q9CQW0	P04104	E9PYB4	Q9CZB0	Q91W34	Q8K2C9
A6ZI46	P19096	B1AUE5	Q9WTQ8	P70245	Q00898
A9R9W0	P59759	Q7TSH7	Q8K4Z3	P51163	Q9CYH2
Q61153	Q91V92	Q91XZ8	Q78XF5	Q6XPS7	P22599
P14602	Q8JZU2	P97290	P48962	P53798	P51125
P16627	Q8VED5	Q9D0P8	Q8R242	P97801	Q9D023
Q99KU6	Q9DAW9	Q8BGA9	Q05816	Q8CFA2	Q6P8J7
Q9WUA5	Q01097	Q60629	O09172	Q9EPK7	P31001
P56400	A2BIM8.P02762.P04938	Q8CGB6	Q9JKY7	Q9CQ60	P61082
Q5U4H9	Q8BJ56	P27661	Q9CQR4	Q60967	P31230
AMYS	Q4FZG7.Q9WVA2	Q9DC11	Q9DB20	Q8VCL2
Q61390	Q61646	Q9QZA0	Q9DB77	Q8CC86
Q9CPX8	Q8BXR9	Q8CBA2	Q8K3J1	Q9Z0M5
Q3UL36	Q9ERL9	A2AJQ3	Q7TMF3	Q61838
Q60963	Q9DC77	Q8VHK1	Q8BHG1	Q9D1P0
Q91WN2	Q07456	P48771	Q91VA7	Q8R0Y8
Q80T14	Q8CC36	Q61581	Q9D6R2	Q9D517
Q9R0A1	Q9JJC6	Q3TBW2	P50171	P97792
Q63836	P40142	Q02614	Q8CAY6	Q9CQR2
Q9Z1P8	Q91WB2	Q8R3V6	O35857	Q9CXT8
Q5QGU6	Q9R0M4	P50427	Q5SWU9	P62320
Q61036	Q80X73	Q91WB4	Q05920	Q61830
Q61462	Q8R326	Q80UK8	P21619	Q9CQ06
P62843	O09164	Q9D9H8		P23953
P56655	Q9EPL2	E9PYD1		Q9QZN4
Q61301	Q99LP6	A3KFM7		P54869
Q8K4F5	O55229	A0A5F8MQ13		Q8BIP0
Q9CQU3	Q5FW52	Q6AXF6		Q61070
P83882	O55033	D3Z0P8		Q8VCM7
Q9DCB8	P04247	Q9D1I6		E9PZJ8
Q99J56	Q5SX40	O70131		E9Q6R7
Q9JI08	Q6P5D3	Q9JHJ8
Q8VDU5	Q9JK92	Q8BGF7
Q3UC65	P15379	Q923B1
Q9DB60	P70236	Q3TP92
P58158	P06801	P01872
P02463	Q9CQ69	Q6PDX6
Q3TLP5	Q66GT5	P07742
Q91Y74	Q8K1Z0	Q6PDC8
Q8CGR7	Q9CPR4	Q9CR30
P58021	A0A1W2P7J1	Q3TYA6
Q8BH35	Q9CQC9	A2AF47
Q9WV96	Q9QXG4	P49222
Q9CR13	Q80TL7	D3Z6Q9
Q9JKN1	Q8VC30	Q9WVL2
P48428	Q80XB4	P98191
Q99N42	O70571	P31649
Q8K4L0	Q9WTL7	Q9D7M1
Q9DC16	A2A863	O70166
Q99JR6	P70695	Q8VIN1
Q9QWR8	Q91YE6	G5E8F4
Q99PW4	Q78IK4	Q02780
P51954	Q149B8	E9Q3G8
Q62264	Q61187	Q9WV95
P08607	Q8VD26	Q9QXW9
O55042	Q8VBT9	Q08122
A0A571BD48	Q9Z2L6	P97433
P61079	Q8BGU5	Q8BH27
Q566J8	P19536	O88455
P18581	Q99LC5	Q9WUP4
Q9Z2J0	Q8VDP4	Q6P8M1
P97432	Q7TPV4	A0A338P6I9
Q921I2	Q9DCD0	O35900
O08717	A2A8Z1	Q9D1X0
P0C7L0	Q6P8X1	Q91Z92
Q921I0	Q8VEE1	Q9Z1X2
Q8VE38	Q17ST2	Q9ERR7
Q6P9N8	Q91WC0	Q9Z2I2
P97930	Q3TZ89	Q8BPG6
Q6PE15	Q9D8W7	Q8BMQ8
Q9QXZ6	Q9CXZ1	P54729
S4R1W1	Q91YJ5	Q04692
Q91WP6	A6H6E2	O35723
A2AS89	P11103	O70378
Q9CPW9	Q99KR7	Q8C006
O54962	P10922	Q8C031
Q7TQK4	Q9JI75	Q6ZWM4
O88696	Q62186	Q9D273
P98086	Q3THS6	P59240
Q921V5	P19783	P60202
Q8K558	Q8R1G2	Q8K0C1
Q8BHS3	G5E8J6	Q8C6B0
O35969	Q8CI95	Q3V132
Q80W47	Q61655	Q00897
Q8R3G1	Q8BHG2	P01901
Q9JIM1	Q64433	Q9CR20
Q71KT5	Q3UIU2	Q9WTX2
Q8R3Q0	Q9Z1J3	P28230
P62075	Q91VR2	G3X8X0
Q9CQF3	P56391	Q61539
Q8R5C5	Q93092	Q9QY42
Q8R3F5	Q6R0H7	Q8K4X7
P01942	P05201	Q99MB7
A2AQ07	Q9JHI5	Q3TSG4
Q8BI08	Q9CR68	P97825
Q9CW07	P57780	Q5NCE8
Q8CHP8	Q8R016	Q6QWF9
P15327	Q99K51	Q3UWE6
O55239	P97807	Q8K1X4
Q9JIY7	Q60932	Q8R0A5
Q9QZ06	Q61035	Q9DB30
Q9D1L9	Q9JLN9	P84084
Q61696	Q91YT0	Q8BNL5
Q8VHQ9	P70302	Q6ZPY7
Q8BK08	Q99KC8	Q61206
P50462	O08749	P83940
O88712	Q60714	Q04899
Q9Z2V4	Q99JI4	Q9D8L5
Q8QZZ7	Q60737	Q5DU31
A2ASQ1	P61202	Q8BWU1
A6H6A9	Q01405	Q9D071
Q8CIM3	P62196	Q9CQ91
Q61205	P17182	Q8JZL3
P29391	Q80X90	O70496
Q9D8B3	Q68FL6	Q60766
Q9R069		Q9CPW4
Q9CQ89		Q9Z0U0
P19639		P60766
A0A571BF58		Q61285
Q9R0Q9		Q9QUH0
Q91XD7		Q9JHG2
Q9CYV5		Q9CZ28
Q8CAF4		B9EKI3
P09528		P31650
E9Q137		P35283
P06339		Q9DCU6
Q9CR67		O35638
Q8R0N6		Q9EP97
P42125		Q9DAM5
Q9DCG2		Q0PMG2
P34884		Q8VE85
P67778		Q3TJ22
Q76M72		Q9CQU0
Q3UHQ6		Q8C5Q4
P62746		Q80ZW2
A2ADA5		Q99MX7
Q9DCC7		P97950
Q8C7G5		Q8BFR6
A6H6J2		Q8BZM1
Q9ERF3		Q3TX08
Q9Z0H8		Q9EP69
S4R2K0		Q6P5F7
Q4VAA2		Q76HP3
Q80TM6		P28704
Q9CX98		Q6WKZ8
Q8VDT9		Q8BKG3
P58802		Q9EPR4
A8DUK4		Q9JHU9
O89079		B1AR17
O35657		Q9D7P6
P10648		Q9WU84
Q8CIG3		Q64152
Q00724		Q9CZS1
P97785		O89029
Q02357		O08530
P47877		Q3UHH2
O35683		Q9QZS8
P97762		Q8BHT6
A3KGB4		Q8K296
Q91XE0		Q91X72
Q8R366		P47746
Q8CIL4		Q80T85
Q61140		Q9CQM5
Q8BGI5		B2RUS7
Q8C7D2		Q5NBX1
Q9DC63		Q8CIP5
Q9JK42		Q9Z280
Q9CWB7		Q3UJP5
Q8VCZ9		Q8BVG4
Q9D1J3		Q0PHV7
Q9DBI0		Q8BH79
P26928		Q60823
P17563		Q8BR90
Q3TH73		P40240
Q9DCY0		Q61730
Q8CGU1		Q9WTU3
Q7TQI7		Q99JX7
Q80U38		P21981
Q8BGX2		Q8BWZ3
P97821		P03995
Q8JZK9		Q8C2E7
Q99PI5		Q9JIA1
O35728		P62812
Q99J23		O88507
Q99KP3		Q60676
Q5U4C3		Q9WUB3
Q8VBZ3		Q3UHH1
Q9Z2C5		P68404
Q9Z2I8		P31938
P15508		Q8K0G5
Q3UHA3		Q9D6Y7
Q99N16		P53811
P46412		Q8K3F6
P54071		Q3UMB5
P09925		Q91YK0
Q9QXA5		Q03137
Q9Z2H5		A2AHG0
P63028		Q99MJ9
Q9WVL0		P15388
O35658		O08672
P70182		F8VPP8
Q9QYR7		Q8R066
O08983		Q60770
Q5FW57		Q6P4T1
Q9D0S9		Q8C4Q6
Q9D0L7		Q9D0A3
Q61753		Q3UVR3
Q61133		Q6DFY8
Q8K1X1		Q60803
O70309		Q6ZQ88
Q7TT18		Q8BK64
Q9D187		Q9JJ59
Q9D939		Q9Z2D3
Q8CHY6		Q9DB41
Q63880		A2ALU4
P03953		Q3V1L4
Q9DBE8		Q91W90
P38060		P62821
Q8C5L7		Q8BYR5
P04919		Q9Z329
Q9CQF8		O89112
Q76LS9		Q80U87
Q6ZPR6		A0A286YCX6
Q9JJL3		O35526
Q810U5		Q9R0N7
Q9EP53		Q923Z0
P61514		Q9ERK4
Q3TL26		Q01063
Q8BMK0		Q8BFQ4
P13634		Q811I0
Q9WV69		Q8C4X2
Q9EPL8		Q920P5
P02104		Q80U19
Q6A009		Q8C570
P97325		P70188
Q9WUR9		Q91VE0
Q64337		Q6PHU5
Q60960		Q8BIJ6
P97798		Q9EQQ9
Q9D7X3		Q6P1I6
Q9DCT8		Q0VBL3
Q8C6I2		Q5H8C4
Q9DCW4		Q91XU0
P51855		P52760
O88986		Q8K0D0
Q8C092		P70122
Q9JJW0
Q9D154
Q9D7A8
Q6EDY6
Q9DCS3
Q8R3Y5
Q9JLZ8
P23506
Q9CR24
Q8R1S9
Q8BMQ2
Q8CHQ9
P08032
Q6PB51
E9Q7D5
Q3UDR8
P16045
P01844
Q91WL8
A2AIL4
P98192
Q8CFI5
P62983
Q9JKW0
Q9CXI0
Q80ZS3
Q61151
Q9DAC7
P50544
Q9CRB2
Q8CCH2
P17879
Q8BWH0
Q9QVP9
O88962
Q924T2
Q3U829
Q8VCH6
P19157
O35459
Q64446
Q8R180
Q4FK66
O35613
Q99JY0
Q8QZY2
Q9CQW9
P06909
Q9CWP6
Q91X97
P81117
Q9JMG1
O89020
Q8C142
Q5DU57
Q8BMS4
P00920
O35488
Q9CWY8
P50285
Q9DB25
P18242
Q7TSQ8
Q64735
P40936
Q9CQ48
P06683
Q9CWG8
A2A4P0
G3X982
P01639
Q9D8P4
A0A0B4J1I0
Q9JLV1
P47915
Q91X51
Q3UVK0
Q8CCF0
E9Q555
Q9ET54
Q3UBG2
Q14AI6
D3Z423
Q9D1M0
Q99L13
Q06890
Q3U4I7
A0A0A6YXQ0
P39876
Q8CFI2
Q64105
Q3TQB2
Q924Z4
P14206
E9Q1A5
Q8VE95
P16015
Q99JW2
P97872
Q61171
Q80X71
O35963
P58742
Q9D7N3
Q8BNI4
P01837
Q61823
Q61207
Q9CY34
Q8R1S0
Q6PGB6
A2A5R2
P20444
Q8K354
P20108
Q9DBH5
O88544
P24063
Q99J39
Q9DBL7
Q8JZV7
B2RY04
P51175
Q6PD03
Q91X52
O35691
ALBU
Q8R084
Q03311
Q9D1M7
Q8K1B8
Q64669
Q8K273
P59999
P08030
Q08761
Q80W54
O09110
O55137
P99025
Q9JK23
Q60994
P58735
Q9WVJ2
O08966
P50429
Q9D967
P28665
Q8BGS2
Q9R0X4
Q00612
Q9WTP7
Q924D0
Q8BYM8
Q8CIW5
Q3TLD5
Q8VCC1
O09159
Q80XN0
O55091
Q921H9
P24668
Q9DCC4
P57016
Q920L1
Q921S7
P20852
P23780
Q8BFP9
P22315
P84089
Q9QUI0
Q6NZB0
Q8VE09
Q8VDQ8
Q8CDN6
Q9D958
Q8K2Y7
Q91XL1
P23881
A2AKK5
Q8CHH9
P70290
P54116
Q8R1I1
Q9D2R0
Q91Z31
Q8R010
Q8VCH7
Q6ZQI3
Q61235
O08915
P97328
Q3UBX0
E9Q8D0
Q60634
P55096
Q14CH7
Q9CY62
Q8BPE4
Q9JJ89
Q99K67
A2A8U2
P29699
B2RT89.Q96LX3
Q8BH24
Q9CQZ5
Q05685
O70570
P68134
Q9D0F4
P17717
P15535
P07724
Q8BWT1
Q99LB6
Q8K370
Q8K3K7
P16294
Q60953
Q9QXC1
Q8VDD8
Q8CG76
Q07113
Q8C163
Q9D0T1
Q8BMS1
P40336
O35593
P35564
P15626
E9Q4Z2
Q9CQV5
Q6NT99
Q8BUR4
P11499
O88736
Q791V5
Q07235
Q8BWJ3
Q8JZZ0
Q6PHQ8
P53612
Q9Z1Q2
Q8VEM8
Q5SVR0
Q6PB93
P23492
Q64374
P53986
P62880
Q8BP40
Q8K1J5
Q8VCN5
Q9WTP6
Q9CQQ7
Q91XE8
Q9JIK9
P55050
Q9JKF7
Q9CQ54
Q62172
Q9Z2Y8
Q6P1H6
O89106
Q8BPM0
Q64458
Q60866
O70362
Q9CYI4
Q9WUR2
P13020
P08122
Q9CQR6
O55143
O35615
P62806
Q9D8S3
P53395
Q8BX17
Q5BL07
Q02248
P63323
E9PV24
F6XJP7
Q6ZWY3
Q60991
Q91W64
Q3TW96
Q9R1P3
Q9EQK5
Q8C3F2
Q8BG67
O35609
P42703
O35490
Q811U4
Q9D8X2
Q99J99
Q5FWH6
Q3TCN2
Q5SWD9
Q8BK48
O08917
Q8BM55
Q60597
P50396
Q9Z2Q5
O35295
Q8BKZ9
Q3U3R4
Q8BYA0
Q9R092
O54754
P84104
Q8K212
Q3UUI3
P45376
Q8BK72
P48776
Q99KI0
Q99P30
E9Q8B5
Q9CXN7
O70503
P29416
Q8C025
P63321
Q8VCA8
B2RRE7
Q2TBE6
Q8K297
Q922B9
Q9R049
Q8BH86
Q03160
Q9DB26
Q3TDQ1
P52825
Q8R3Q6
O54749
Q9D662
Q8BJ64
P62774
P14094
Q9CQ62
Q9CXS4
O08715
P60670
P35123
Q9DBA6
E0CZ22
K9J7B2
Q09200
Q6PDN3
Q8R151
Q8R0X7
Q9QXT0
Q571F8
Q8K1R7
Q3UM18
Q99N19
P33267
Q8CAQ8
Q9QXX4
Q8BJY1
P10649
Q8C0K5
Q9WTI7
Q9D6M3
Q8CFI0
Q61578
Q8VI94
P56654
Q07417
Q8K0E8
Q8VCM3
Q9CQP0
Q9DCM0
Q3UIR3
Q8BFR5
Q9DAS9
Q91WL5
Q8JZR0
Q8K1H1
P24270
Q8VHE0
Q64464
Q8BTZ7
P49312
O35215
Q8BGC4
O70400
P51174
P51658
Q9QZW0
O08759
Q9WVM8
Q91ZX7
Q922Q1
Q6VN19
O08795
Q9ESV0
Q9EPE9
P69566
P52430
Q9CPR5
P58710
Q9ERI6
O08914
E9Q735
Q6P1F6
Q9D880
Q3TIU4
Q9D819
Q91X91
Q9WV55
Q9CQ26
E9PVA8
Q8R1B4
Q9Z0X1
P20060
P49586
Q60649
Q61595
Q8R4N0
Q91VA0
Q80UU9
P00329
P56593
Q9DC50
Q925I1
Q7TNG5
Q8BWU8
Q8BL97
Q8N7N5
Q9CZ42
Q6XVG2
Q8BWF0
Q99KH8
Q99PT1
Q64726
P11725
Q7TMQ7
Q8BG05
Q9JK81
P14211
Q9CWK8
Q8BL66
Q91X77
Q9Z2I9
P07759
Q91WK0
Q91VT4
Q9CZ13
P62908
P22892
P03958
Q3ULD5
Q8BTI8
Q61598
P48193
Q9CR59
P63038
Q921N6
P99029
P32020
B1AUN2
Q3UYI5
Q8BFY9
Q5SW19
Q9Z0H3
O35841
O35639
P12265
P24456
P70398
P41216
P17427
P60229
Q03963
Q80UM3
Q5SUR0
Q8CAS9
P30416
Q9D0R2
O55060
Q8BU30
Q8VCR7
Q8CIM7
P51150
Q56A08
Q8CGC7
Q9QXD1
Q99K41
Q6ZQ38
P56399
Q05421
Q8CGK3
A2AN08
Q9CPX6
P38647
Q8K411
F6ZDS4
P12382
O35350
Q9CR62
Q9CQS4
Q78JT3
Q9Z0U1
Q9QUR7
P26039
Q8BNV1
P27659
O70194
Q9EP75
O55022
Q91VA6
Q99M51
Q64727
Q3UED7
P35550
G5E8K5
Q8C854
Q9D051
Q9DBF1
Q8BY87
Q6PDI5

## Sheet: SYNAPTIC VESICLE LOCALIZATION
	Liver		Muscle		Cortex
	CADH2	AP3D1	CADH2	AP3D1	CADH2	AP3D1
Sample	P15116	O54774	P15116	O54774	P15116	O54774
Group1_1	21.396	19.8546	15.2462	17.687	22.5516	23.0148
Group1_3	22.1587	19.2213	17.8941	18.03	22.5246	22.8764
Group1_4	21.7571	20.1885	17.5399	18.1299	22.6129	22.6932
Group1_5	22.0747	20.1912	16.5168	17.82	22.6879	22.6964
Group1_6	22.26	20.3137	17.2702	18.1955	22.7291	22.594
Group1_7	22.1761	20.3108	17.6295	18.0133	22.5747	22.6628
Group1_8	22.2035	20.1525	17.6489	19.004	22.0811	22.6157
Group2_2	22.0588	20.2784	16.6636	18.4711	22.667	22.6691
Group2_3	21.8095	20.185	15.8666	18.0583	22.5329	22.7924
Group2_4	22.0118	19.9507	17.3282	17.706	22.4013	22.5144
Group2_5	22.1675	20.2243	15.7381	18.4218	22.6916	22.7534
Group2_6	21.6041	20.1131	18.7382	19.4496	22.6645	22.5212
Group2_7	21.8998	20.1431	18.1271	18.7653	22.5989	22.5146
Group2_8	21.5639	20.6729	17.5811	17.564	22.4633	22.6534

## Sheet: Common BP
Liver+Muscle
Name	GO	GO Term	Genes
VIRION ASSEMBLY%GOBP%GO:0019068	GOBP	GO:0019068	Q9CQ10|Q9D8B3|Q80ZI6|Q61187|P46467|Q8VEJ9|Q9DB34|Q9D7S9|Q78HU3
NON-PROTEINOGENIC AMINO ACID METABOLIC PROCESS%GOBP%GO:0170041	GOBP	GO:0170041	Q91WN4|Q8VCN5|P42859|Q8K4H1|Q91YI0|Q8BTY1|Q61176|Q8BWF0|Q99LB7|Q9QZX7|Q71RI9|P31428|P24549|Q91WT9|Q9WVM8|Q922D8|Q61753|B2RQC6|Q8VC97|Q99J99|Q8R016|P50247|P61922|Q9EQ20|Q9R0E1|P11725|Q9CXF0|O35969|Q8R0V5|P48776|Q9EQF5|Q9QXF8|Q3UEG6|P23506|P16460|Q9CWS0
DICARBOXYLIC ACID METABOLIC PROCESS%GOBP%GO:0043648	GOBP	GO:0043648	Q91Z53|Q8QZR1|P06801|Q78JT3|Q9JHW2|Q9WVM8|O08749|Q922D8|Q04857|Q8R0N6|Q8BH04|P54071|Q8K2B3|Q8VCZ9|Q9CQA3|P15105|Q9CWJ9|Q60597|Q9CZU6|Q8BWN8|Q91VA7|Q8R4H7|Q9D6R2|Q91V92|Q9WUM5|P14152|Q05920|P08249|Q9Z2I8|Q8R0Y6|Q9CQX8|P97494|O88844|Q8K009|Q9Z2I9|Q9D2G2|Q8CIM3|P42859|P70404|O09172|P97807|Q91YI0|Q8BWF0|Q8R3P0|P00375|P26443|P29758|Q71RI9|Q9Z2V4|P05201|P05202|Q8BH59|Q571F8|P28650|P46664|Q8BGT5|Q8BH86|…
PLASMA MEMBRANE REPAIR%GOBP%GO:0001778	GOBP	GO:0001778	Q9CQ10|Q9CQW2|Q9D8B3|Q69ZN7|P46467|Q04519|Q61879|Q8VEJ9|Q9ESD7|Q9DB34|Q9D7S9
GLUTAMINE FAMILY AMINO ACID METABOLIC PROCESS%GOBP%GO:0009064	GOBP	GO:0009064	O09172|Q8R216|P35505|Q91YI0|Q61176|Q8BWF0|P26443|P29758|Q8QZR1|Q8C0M9|Q9JHW2|Q9WVM8|Q61753|Q8R0N6|Q9Z2D6|B2RQC6|Q9DCC4|P05201|P05202|Q8BH59|P70313|Q8VCZ9|Q571F8|P15105|P11725|Q8C196|Q5SUR0|Q8CIH9|Q8R4H7|Q8BH86|Q9WU79|P97494|P16460
ALPHA-AMINO ACID CATABOLIC PROCESS%GOBP%GO:1901606	GOBP	GO:1901606	Q8K4H1|P35505|O09173|Q61176|Q8QZR1|P49429|Q8C0M9|P38060|P60334|Q91WT9|Q8CFA2|Q9JLI6|Q8R0N6|Q80W22|Q9DBE0|P70313|Q8VCZ9|Q91WK5|Q9CXF0|Q8R0V5|P48776|Q8VBT2|O55028|Q91W43|Q8R238|Q8BVI4|Q99LB7|P26443|P29758|Q9DBL1|Q99L13|Q9JHI5|O08756|Q8R016|P05201|Q8QZS1|P05202|P50247|Q9WVL0|Q9EQ20|Q571F8|Q3ULD5|Q99K67|Q8CIH9|Q6XPS7|Q9D826|Q9WU79|Q91X83|Q3UEG6
AMINO ACID METABOLISM%WIKIPATHWAYS_20240510%WP662%MUS MUSCULUS	WIKIPATHWAYS_20240510	WP662	Q8VCN5|P97807|P35505|Q91YI0|Q61425|Q8QZR1|P52480|Q8BU30|P38060|P24549|Q91WT9|Q99L13|O08749|Q9DBF1|Q8BKZ9|P47791|Q921H8|Q9Z2V4|P54869|O35490|Q99J99|P05201|Q8VDC0|P05202|Q8K2B3|Q8QZS1|P24472|P15105|Q91XD4|P45952|Q9CZU6|Q8C196|Q9D0I9|Q99MR8|Q9WUM5|Q8BGT5|Q9WU79|Q9QYY9|P08249|Q8CGC7|O88844|Q99KI0|Q9D2G2|Q9DBM2
PURINE NUCLEOSIDE TRIPHOSPHATE BIOSYNTHETIC PROCESS%GOBP%GO:0009145	GOBP	GO:0009145	Q9CQJ8|Q91YT0|Q9CQZ5|P52503|Q9CQ54|Q91VD9|Q9DC69|Q9DCS9|Q8BK30|P0DN34|Q8K3J1|Q9CQQ7|Q7TMF3|O35683|Q9CZB0|Q9CQH3|Q9CXZ1|Q9CQC7|Q3UIU2|Q9ERS2|Q8K2B3|Q9D8B4|Q91VR2|Q9D6J5|Q9DCT2|Q99JB2|Q9CPP6|Q9CQA3|O09111|Q9CQ91|Q9WTP7|P04202|Q9Z0M5|Q7TNG8|P56380|P50096|Q01768|P15532|P23492|P24547|P55264|Q9CR61|Q9DCJ5|Q99LY9|P56480|Q03265|Q9CQ75|Q99LC3|Q9DB20|Q9Z1P6|P56135|Q9CPQ8|Q9CR84|Q9CPU2|Q91WD5|Q9DCX2|Q9DC70|…
VIRAL RELEASE FROM HOST CELL%GOBP%GO:0019076	GOBP	GO:0019076	Q9CQ10|Q9CQW2|Q9D8B3|P46467|Q8VEJ9|Q9DB34|Q9D7S9
ATP BIOSYNTHETIC PROCESS%GOBP%GO:0006754	GOBP	GO:0006754	Q9CQJ8|Q91YT0|Q9CQZ5|P52503|Q9CQ54|Q91VD9|Q9DC69|Q9DCS9|Q8BK30|P0DN34|Q8K3J1|Q9CQQ7|Q7TMF3|O35683|Q9CZB0|Q9CQH3|Q9CXZ1|Q9CQC7|Q3UIU2|Q9ERS2|Q8K2B3|Q9D8B4|Q91VR2|Q9D6J5|Q9DCT2|Q99JB2|Q9CPP6|Q9CQA3|O09111|Q9CQ91|Q9WTP7|P04202|Q9Z0M5|Q7TNG8|P56380|Q9CR61|Q9DCJ5|Q99LY9|P56480|Q03265|Q9CQ75|Q99LC3|Q9DB20|Q9Z1P6|P56135|Q9CPQ8|Q9CR84|Q9CPU2|Q91WD5|Q9DCX2|Q9DC70|Q9D6J6
RIBONUCLEOSIDE TRIPHOSPHATE BIOSYNTHETIC PROCESS%GOBP%GO:0009201	GOBP	GO:0009201	Q9CQJ8|Q91YT0|Q9CQZ5|P52503|Q9CQ54|Q91VD9|Q9DC69|Q9DCS9|Q8BK30|P0DN34|Q8K3J1|Q9CQQ7|Q7TMF3|O35683|Q9CZB0|Q9CQH3|Q9CXZ1|Q9CQC7|Q3UIU2|Q9ERS2|Q8K2B3|Q9D8B4|Q91VR2|Q9D6J5|Q9DCT2|Q99JB2|Q9CPP6|Q9CQA3|O09111|Q9CQ91|Q9WTP7|P04202|Q9Z0M5|Q7TNG8|P56380|P50096|Q01768|P15532|P23492|B2RQC6|P24547|P70303|P70698|P52623|Q9CR61|Q9DCJ5|Q99LY9|P56480|Q03265|Q9CQ75|Q99LC3|Q9DB20|Q9Z1P6|P56135|Q9CPQ8|Q9CR84|Q9CPU2|…
PROTON MOTIVE FORCE-DRIVEN MITOCHONDRIAL ATP SYNTHESIS%GOBP%GO:0042776	GOBP	GO:0042776	Q9CQJ8|Q91YT0|Q9CQZ5|P52503|Q9CQ54|Q91VD9|Q9DC69|Q9DCS9|Q8BK30|P0DN34|Q8K3J1|Q7TMF3|O35683|Q9CZB0|Q9CQH3|Q9CXZ1|Q9CQC7|Q3UIU2|Q9ERS2|Q8K2B3|Q9D8B4|Q9D6J5|Q9DCT2|Q99JB2|Q9CPP6|Q9CQA3|O09111|Q9CQ91|Q9CR61|Q9DCJ5|Q99LY9|P56480|Q9CQ75|Q99LC3|Q9DB20|Q9Z1P6|P56135|Q9CPU2|Q91WD5|Q9DC70|Q9D6J6
BIOLOGICAL PROCESS INVOLVED IN SYMBIOTIC INTERACTION%GOBP%GO:0044403	GOBP	GO:0044403	Q9CQW2|P11352|Q8K245|P10605|P67778|O35453|Q91Z40|O35345|P63038|P63017|Q62230|P32507|O35604|A0A0G2JDV3|Q9CQ10|Q9JKF6|P51437|P41317|Q9DB34|Q9D7S9|Q8R307|P39039|Q9D8B3|P46467|Q04519|Q920Q4|Q8VEJ9|Q8VCS0|P54116
PROTON MOTIVE FORCE-DRIVEN ATP SYNTHESIS%GOBP%GO:0015986	GOBP	GO:0015986	Q9CQJ8|Q91YT0|Q9CQZ5|P52503|Q9CQ54|Q91VD9|Q9DC69|Q9DCS9|Q8BK30|P0DN34|Q8K3J1|Q9CQQ7|Q7TMF3|O35683|Q9CZB0|Q9CQH3|Q9CXZ1|Q9CQC7|Q3UIU2|Q9ERS2|Q8K2B3|Q9D8B4|Q91VR2|Q9D6J5|Q9DCT2|Q99JB2|Q9CPP6|Q9CQA3|O09111|Q9CQ91|Q9CR61|Q9DCJ5|Q99LY9|P56480|Q03265|Q9CQ75|Q99LC3|Q9DB20|Q9Z1P6|P56135|Q9CPQ8|Q9CR84|Q9CPU2|Q91WD5|Q9DCX2|Q9DC70|Q9D6J6
VIRAL BUDDING%GOBP%GO:0046755	GOBP	GO:0046755	Q9CQ10|Q9D8B3|Q80ZI6|Q61187|P46467|Q8VEJ9|Q9DB34|Q9D7S9|Q78HU3
OXIDATIVE PHOSPHORYLATION%WIKIPATHWAYS_20240510%WP1248%MUS MUSCULUS	WIKIPATHWAYS_20240510	WP1248	Q9CQJ8|Q91YT0|P97450|Q9CQZ5|P52503|Q9CQ54|Q91VD9|Q9DC69|Q9DCS9|Q9CR61|Q9DCJ5|Q99LY9|P56480|Q03265|Q9CQ75|Q99LC3|Q9DB20|Q9Z1P6|P56135|Q9CPQ8|Q9CR84|Q9CPU2|Q91WD5|Q9DCX2|Q9DC70|Q9D6J6
MRNA SPLICE SITE RECOGNITION%GOBP%GO:0006376	GOBP	GO:0006376	Q5SUF2|Q99JF8|E9Q5K9|Q3UEB3|Q9Z0H4|Q91Z31|Q9R0U0|Q3USH5|Q3TWW8|Q6PDM2|Q7TNC4|Q9WV02|Q8K2Z2|Q69ZQ2|P28659|Q9CYI4
L-AMINO ACID METABOLIC PROCESS%GOBP%GO:0170033	GOBP	GO:0170033	Q91WN4|Q8VCN5|P35505|O09173|Q61176|P61458|Q8QZR1|P49429|Q8C0M9|A0JNU3|P38060|Q9JHW2|P60334|Q91WT9|Q9WVM8|P16331|Q922D8|Q8CFA2|Q9JLI6|Q9CZN7|Q80W22|Q8R0N6|Q9Z2D6|Q9DBE0|Q9DCC4|Q99J99|Q9DCX8|P70313|Q8VCZ9|Q9R0E1|P15105|Q8BH69|Q91WK5|Q8R4H7|O35969|Q8VBT2|O55028|Q91W43|Q8R238|P50431|P97494|P16460|O35423|Q8BVI4|O09172|Q8R216|Q91YI0|Q8BTY1|Q8BWF0|Q8R3P0|Q9QZX7|P29758|P26443|Q9JHI5|Q61753|B2RQC6|Q91XE0|…
BIOLOGICAL PROCESS INVOLVED IN INTERACTION WITH HOST%GOBP%GO:0051701	GOBP	GO:0051701	A0A0G2JDV3|Q9CQ10|Q9CQW2|Q9JKF6|Q8K245|P10605|P67778|Q91Z40|O35345|P63038|Q9DB34|Q9D7S9|Q8R307|Q9D8B3|P46467|Q04519|Q62230|Q920Q4|P32507|Q8VEJ9|Q8VCS0|O35604
PURINE RIBONUCLEOSIDE TRIPHOSPHATE BIOSYNTHETIC PROCESS%GOBP%GO:0009206	GOBP	GO:0009206	Q9CQJ8|Q91YT0|Q9CQZ5|P52503|Q9CQ54|Q91VD9|Q9DC69|Q9DCS9|Q8BK30|P0DN34|Q8K3J1|Q9CQQ7|Q7TMF3|O35683|Q9CZB0|Q9CQH3|Q9CXZ1|Q9CQC7|Q3UIU2|Q9ERS2|Q8K2B3|Q9D8B4|Q91VR2|Q9D6J5|Q9DCT2|Q99JB2|Q9CPP6|Q9CQA3|O09111|Q9CQ91|Q9WTP7|P04202|Q9Z0M5|Q7TNG8|P56380|P50096|Q01768|P15532|P23492|P24547|Q9CR61|Q9DCJ5|Q99LY9|P56480|Q03265|Q9CQ75|Q99LC3|Q9DB20|Q9Z1P6|P56135|Q9CPQ8|Q9CR84|Q9CPU2|Q91WD5|Q9DCX2|Q9DC70|Q9D6J6
AEROBIC RESPIRATION I (CYTOCHROME C)%BIOCYC%PWY-3781	BIOCYC	PWY-3781	Q9CQJ8|Q91YT0|Q9CQZ5|Q9CQ54|Q91VD9|Q9DC69|Q9DCS9|Q9CZB0|Q9CQ69|Q62425|Q9CQC7|P56391|Q9D0M3|Q9ERS2|Q9CR68|Q8K2B3|P48771|Q9CZ13|Q9DB77|P12787|Q9CQA3|O09111|Q9CQ91|Q9CR61|Q9DCJ5|Q99LY9|Q9CQ75|Q99LC3|Q9Z1P6|Q9CPU2|Q91WD5|Q9DC70|Q9D6J6
PROTEINOGENIC AMINO ACID METABOLIC PROCESS%GOBP%GO:0170039	GOBP	GO:0170039	Q8VCN5|P35505|O09173|Q61176|P61458|Q8QZR1|P49429|Q8C0M9|A0JNU3|P38060|Q9JHW2|P60334|Q91WT9|Q9WVM8|P16331|Q922D8|Q8CFA2|Q9JLI6|Q9CZN7|Q80W22|Q8R0N6|Q9Z2D6|Q9DBE0|Q9DCC4|Q99J99|Q9DCX8|P70313|Q8VCZ9|Q9R0E1|P15105|Q8BH69|Q91WK5|Q8R4H7|Q8VBT2|O55028|Q91W43|Q8R238|P50431|P97494|P16460|O35423|Q8BVI4|O09172|Q8R216|Q91YI0|Q8BWF0|Q8R3P0|Q9QZX7|P29758|P26443|Q9JHI5|Q61753|B2RQC6|Q91XE0|Q64105|Q99JT9|Q9CQT1|…
VIRAL LIFE CYCLE%GOBP%GO:0019058	GOBP	GO:0019058	Q9D906|Q9CQW2|Q80ZI6|Q8K245|Q61187|P10605|P67778|O35345|Q78HU3|P52293|Q62230|P32507|Q8C0J2|O35604|Q9CQ10|Q9JKF6|Q9DB34|Q9D7S9|Q8R307|Q9D8B3|P46467|Q04519|Q920Q4|Q8VEJ9|Q9Z0H3|Q99J83
VIRAL PROCESS%GOBP%GO:0016032	GOBP	GO:0016032	Q61191|Q9D906|Q9CQW2|Q80ZI6|O54962|Q8K245|Q61187|P10605|P67778|O35345|P62915|Q78HU3|P52293|Q62230|P32507|Q8C0J2|O35604|Q9CQ10|Q9JKF6|Q9DB34|Q9D7S9|Q8CAK3|Q8R307|Q9D8B3|P46467|Q04519|Q920Q4|Q8VEJ9|Q9Z0H3|Q99J83
REGULATION OF TORC1 SIGNALING%GOBP%GO:1903432	GOBP	GO:1903432	Q9D1F4|Q921J2|P68181|Q924H7|O08759|Q61037|Q8VCX6|Q9EP53|Q7TQI3|Q6P4S6|Q8CGY8|O35604|Q8VE19|Q9WUN2|Q9D1M0|Q8BRK8|Q5EG47|Q570Y9|Q80X95|P05132|P31750|B2RWS6|Q9CQ22|P35123|Q8C0M0|Q8R2U0|Q91WI7|Q9D1L9
Liver+Cortex
Name	GO	GO Term	Genes
CYTOPLASMIC TRANSLATION%GOBP%GO:0002181	GOBP	GO:0002181	P62918|P97461|Q8CHW4|P10630|P62082|P62751|P63323|P62911|P25444|P47911|P63325|P62754|P97351|Q9CR57|Q9QXB9|Q9JJI8|P14206|Q9CPR4|P62242|Q9DB27|O55142|P62245|P84099|P62889|Q9CZM2|P53026|O70194|A2AGT5|Q9CQJ6|P26638|P51410|P32233|P62270|P14148|Q9CQR2|P62264|Q6ZWN5|P62267|Q9D8E6|P47962|Q6ZWV7|P47963|P62702|Q8BP67|P62301|Q9CXW4|P35979|P62717|Q99LD9|P19253|Q99L45|P62281|P12970|P14115|P35980|O09167|P47955|…
PROTEINOGENIC AMINO ACID CATABOLIC PROCESS%GOBP%GO:0170040	GOBP	GO:0170040	Q9Z0J4|Q8R0N6|P05201|Q8CIH9|P05202|Q9DBE0|D3Z7P3|Q9WVL0|P26443|Q8BVI4|Q3ULD5|Q8C0M9|P29758|P38060|Q9JHI5|O55028|Q80W22
REGULATION OF PTEN STABILITY AND ACTIVITY%REACTOME DATABASE ID RELEASE 81%8948751	REACTOME DATABASE ID RELEASE 81	8948751	Q5BKP2|Q3UES3|P54775|P62196|Q8BJY1|P14685|P49722|Q9D8W5|P99026|Q9R1P0|O35593|Q9CR00|Q5SSW2|O55234|Q3TXS7|P70195|Q60692|Q99JI4|P31750
REGULATION OF EXTRACELLULAR MATRIX ORGANIZATION%GOBP%GO:1903053	GOBP	GO:1903053	P10493|Q60675|Q61292|Q61553|P02468|Q04857|P02469
S PHASE%REACTOME DATABASE ID RELEASE 81%69242	REACTOME DATABASE ID RELEASE 81	69242	P54775|P62196|Q8BJY1|P14685|P49722|Q9D8W5|P99026|Q9R1P0|O35593|Q9CR00|Q5SSW2|O55234|Q3TXS7|P70195|Q60692|Q99JI4|Q9WTX6|Q9CU62|P31750
Muscle+Cortex
Name	GO	GO Term	Genes
NEUROTRANSMITTER TRANSPORT	GOBP	GO:0006836	P62835|Q8BRU6|Q99LX0|Q9JIM1|O88643|Q3TXX4|Q9CS84|Q8C7M3|Q80U72|O35633|P49769|Q6P9K9|O55017|Q9Z1M0|P97445|P43006|Q8CHC4|Q04690|O88935|Q8BFU8|P28028|Q8BLE7|P63011|P51141|Q5RJI5|P61264|Q8JZP2|P63044|Q920N7|O55042|Q8BG67|Q9QYX7|Q61327|Q8BYR5|P28571|P60191|Q99MI1|Q68FG2|P24529|P60469|Q8JZS0|Q9DBS2|P60879|Q61548|P46097|Q64332|O88952|P56546|Q6NXK8|Q8R1B5|Q80U57|Q9DB05|Q62442|Q60857|D3YWQ0|Q4KUS2|O88533|…
ELECTRON TRANSPORT CHAIN	WIKIPATHWAYS_20240510	WP295	Q9CQC7|Q9CPU2|P56480|Q9CQJ8|Q9CQZ5|Q8BJ03|P48771|Q9DCS9|Q9DB20|P48962|Q9CZ13|P52503|Q9DC70|Q03265|P12787|Q9CQ54|Q9D6D0|P97450|Q91VD9|P56135|Q99LC3|Q9CRA7|Q9Z1P6|Q9D6J6|Q91YT0|Q9CXV1|Q9CQ69|Q9DC69|Q9CR68|Q9CPQ8|Q91WD5|P99028|Q9DCX2|Q9DB77|Q9CPQ1|Q5SUC9|Q8K2B3|Q9CZB0|Q9CR61|Q9CQA3|Q9DCJ5|Q99LY9|Q9CQ75
EXPORT ACROSS PLASMA MEMBRANE	GOBP	GO:0140115	Q61165|Q8VDN2|O35379|P70414|Q9Z0V1|Q3UVU3|S4R2P9|P23242|P63141|Q03717|Q7TMS5|Q6PIE5|Q9Z1W8|P14094|Q6PIC6|P41233|P97370|P21447|Q8CGQ8|Q9WV27|Q8C996|P14231|Q60738|Q8K596|D3Z649
POTASSIUM ION TRANSMEMBRANE TRANSPORT	GOBP	GO:0071805	P16388|Q9Z2I0|Q924N4|Q61923|P97438|P63250|Q9WVL3|P16390|Q9Z0V1|Q9Z0V2|Q08460|Q9Z218|Q9WVJ0|Q3UGP8|Q7TSH7|P56564|P63141|P35561|Q61743|Q9JIS8|Q9JK45|Q03717|Q03719|Q91V14|P55012|B2RXE2|Q61165|Q8VDN2|A1L3P4|O88704|O88705|O88703|O70507|O08581|Q8BLV3|Q6PIE5|Q9Z1W8|P14094|Q6PIC6|P97370|Q9WV27|Q8BXR5|P14231|Q9Z351|Q14B80|Q6ZPR4|Q3TMP8|Q8K3F6|Q91VC9|Q9CXJ4|P15388|P58391|Q9JM63|P58390|Q60603|Q63959|P48543|…
RESPIRATORY ELECTRON TRANSPORT	REACTOME	R-HSA-611105.6	Q9CWD8|Q8BH59|Q9CZ13|Q9CWG8|Q9DC70|Q9DB41|Q62425|Q921G7|P08249|Q91VD9|P05202|Q9DC69|Q6PB66|Q99LC5|Q59J78|Q5SUC9|Q9D0M3|Q9DCW4|Q9CR61|Q9DCJ5|Q99LY9|A2APY7|Q9JKL4|Q9CQN1|Q9CQC7|Q9CPU2|Q9D1H6|Q9CQJ8|Q9CQZ5|O09111|Q9CQ91|Q9DCS9|Q8K0Z7|P56391|Q9D7J4|P12787|Q9CQ54|P05201|Q99LC3|Q9Z1P6|Q9D6J6|Q91YT0|Q8JZN5|Q9CXV1|Q9CQ69|Q8BUY5|Q9CR68|Q91WD5|Q9DB77|Q9ERS2|Q8K2B3|Q9CZB0|Q9CQA3|Q9CQ75
REGULATION OF MICROTUBULE DEPOLYMERIZATION	GOBP	GO:0031114	Q8R1Y2|Q9Z1K7|Q8JZP9|Q8CGF6|Q3UMY5|Q9Z2V5|A2AHC3|Q61315|Q14BB9|Q9QYR6|P14873|Q8BRT1|Q8C052|P20357|Q2KN98|Q60875|Q9JMG7|Q80VC9|Q8C1B1|Q80TV8|P70377
INORGANIC ION IMPORT ACROSS PLASMA MEMBRANE	GOBP	GO:0099587	Q61165|Q8VDN2|Q924N4|P70414|P63250|Q9WVL3|Q75N73|Q9Z0V1|Q6P5F6|A1L3P4|Q8C145|S4R2P9|P35561|Q61743|Q9JIS8|Q8BLV3|Q91V14|Q6PIE5|Q9Z1W8|P55012|P14094|O55017|Q6PIC6|Q61290|P97370|Q8CGQ8|Q9WV27|Q5FWH7|P97445|P14231|Q925B0|Q01815|Q9JM63|P48543|B2RXE2|P52189|P48542|Q8K596|Q9Z307|B2RUS7
SODIUM ION TRANSMEMBRANE TRANSPORT	GOBP	GO:0035725	Q61165|Q8VDN2|P70414|Q6NXK8|A1L3P4|Q60857|S4R2P9|O88704|O88705|O88703|O70507|P83741|O08581|B1AWN6|Q8BLV3|A2ASI5|P31650|Q6PIE5|P31649|Q9Z1W9|Q9Z1W8|P31648|P55012|Q9WTU3|P97952|O55192|O35316|P14094|Q8BJI1|Q6PIC6|Q8BG16|P97370|Q9WV27|Q8BXR5|P14231|Q9Z351|E9Q7P2|Q925H0|B2RXE2|Q6PGE7|Q8K596|Q61327|P28571|A2APX8
NEGATIVE REGULATION OF MICROTUBULE DEPOLYMERIZATION	GOBP	GO:0007026	Q8R1Y2|Q9Z1K7|Q8JZP9|Q8CGF6|Q3UMY5|Q9Z2V5|A2AHC3|Q61315|Q14BB9|Q9QYR6|P14873|Q8BRT1|P20357|Q2KN98|Q60875|Q9JMG7|Q80VC9|Q8C1B1|Q80TV8|P70377
REGULATION OF GLUTAMATE SECRETION	GOBP	GO:0014048	Q01097|Q9WV18|Q8CFE6|Q9Z1M0|Q80UJ7|O08553|Q60612|Q68ED2|O55042|Q14BI2|O08599|P06537
MITOCHONDRIAL TRANSLATION	GOBP	GO:0032543	Q9DCA2|Q8VE22|Q9CR88|Q3U186|O35972|Q8VDC0|Q9CPR5|Q99JT1|Q8BIJ6|Q80X85|Q8K0D5|Q9CZR8|Q9CY73|Q91YJ5|Q9ER88|Q61035|Q9CZD3|Q8C2E4|Q8R035|Q8BJU9|Q9CZN8|Q8BFR5|Q9JKF7|Q9D8P4|Q8R2Q4|Q9CZ83|Q9DC71|Q924T2|Q9CQF0|Q8K2M0|Q9CQE3|Q9CQL4|Q8BK72|Q9D1I6|Q9D0G0|Q9D1P0|Q3TBW2|Q9CQ06|Q99N87|Q9D1N9|Q9JIK9|Q921S7|Q9JJL8|Q9EQI8|Q922E6|Q61733|Q9CQN7|Q9D773|Q9D125|Q9CQ40|Q9D7N6|Q9D7N3|Q9DCU6|Q9DB15|Q99N93|Q9D338|Q14C51|…
POTASSIUM ION TRANSPORT	GOBP	GO:0006813	P16388|Q9Z2I0|Q924N4|Q61923|P97438|P63250|Q9WVL3|P16390|Q9Z0V1|Q9Z0V2|Q08460|Q9Z218|Q9WVJ0|Q3UGP8|Q7TSH7|P56564|P63141|P35561|Q61743|Q9JIS8|Q9JK45|Q03717|Q03719|Q91V14|Q3TXX4|P55012|B2RXE2|Q61165|Q8VDN2|A1L3P4|O88704|O88705|O88703|O70507|O08581|Q8BLV3|P36552|Q6PIE5|Q9Z1W8|P46414|Q9Z0J4|Q9JIN6|P70313|P46467|P46460|P14094|Q9EP53|Q6PIC6|P97370|Q9WV27|Q8BXR5|P14231|Q9Z351|Q14B80|Q6ZPR4|Q3TMP8|Q8K3F6|…
REGULATION OF AMINE TRANSPORT	GOBP	GO:0051952	P63141|Q03717|Q14BI2|P55012|P49769|Q9Z1M0|P97445|O08553|Q8BFU8|Q9ER39|P63011|Q9DCP2|Q8CFE6|O55042|Q01097|Q80UJ7|Q60612|P06537|P31648|O35526|P28334|Q99P72|P63054|P47746|P46096|O35304|Q99104|P22437|P35363|P42208|P35347|P68404|O70174|Q68ED2|O08599|P09055|P26339|Q9CXV1|Q9JIS5|Q9JKW0|Q3UGX3|Q9Z0F7|Q9R0N3|Q9WV18|Q9R0N7|Q68FM7|P61922|Q8R3B1|P55772|Q99MK8|Q8R5J9
KETONE BIOSYNTHETIC PROCESS	GOBP	GO:0042181	Q8K1Z0|P05064|Q8BMS4|Q9CXI0|P17751|Q8R1S0|Q9DC69|Q60936
IMPORT ACROSS PLASMA MEMBRANE	GOBP	GO:0098739	O35379|Q924N4|P63250|Q9WVL3|Q75N73|Q9Z0V1|Q6P5F6|P51906|Q8C145|P03995|P56564|P35561|Q61743|Q9JIS8|Q09143|Q91V14|P97772|P55012|O35874|P49769|P18581|Q5U4D8|O55017|P10852|Q5DU41|Q61290|O35544|Q9ES07|Q8R502|Q8CGQ8|Q8BGR2|O88520|Q80WG5|P97445|P43006|Q5FWH7|Q925B0|Q01815|Q9DCP2|Q8CFE6|B2RXE2|P28867|Q6PGE7|Q8K596|P28571|Q61165|Q8VDN2|P70414|P70441|A1L3P4|S4R2P9|Q8BLV3|Q6PIE5|Q9Z1W8|O35316|P14094|Q6PIC6|…
AEROBIC RESPIRATION AND RESPIRATORY ELECTRON TRANSPORT	REACTOME	R-HSA-1428517.4	Q9CWD8|Q8BH59|Q91VA7|O08749|Q99KI0|Q9D6R2|Q9D023|Q9CZ13|Q9CWG8|Q9DC70|Q9DB41|Q62425|Q91YP0|Q8R0F8|Q9D6D0|Q60932|Q99KE1|Q8BMF3|Q921G7|P08249|P54071|P97450|Q8R0N6|Q91VD9|P56135|P05202|Q06185|Q9CRA7|Q9DCB8|Q8K215|Q9DC69|Q6PB66|Q99LC5|Q8QZT1|Q59J78|Q5SUC9|Q9D0M3|Q4VC33|Q9DCW4|Q8BFP9|Q9CR61|Q9DCJ5|Q99LY9|A2APY7|Q7TSQ8|Q9JKL4|Q9D7M1|Q9CQN1|Q9CQC7|Q9CPU2|P97807|P56480|Q9D1H6|Q9CQJ8|Q9CQZ5|O09111|Q9JK42|…
INORGANIC CATION IMPORT ACROSS PLASMA MEMBRANE	GOBP	GO:0098659	Q61165|Q8VDN2|Q924N4|P70414|P63250|Q9WVL3|Q75N73|Q9Z0V1|Q6P5F6|A1L3P4|Q8C145|S4R2P9|P35561|Q61743|Q9JIS8|Q8BLV3|Q91V14|Q6PIE5|Q9Z1W8|P55012|P14094|O55017|Q6PIC6|Q61290|P97370|Q8CGQ8|Q9WV27|Q5FWH7|P97445|P14231|Q925B0|Q01815|Q9JM63|P48543|B2RXE2|P52189|P48542|Q8K596|Q9Z307|B2RUS7
